# Supplementary material for: Optimized Vivid-derived Magnets photodimerizers for subcellular optogenetics in mammalian cells
Source: eLife. 2020 Nov 11;9:e63230. doi: 10.7554/eLife.63230 (PMC7735757; doi:10.7554/eLife.63230)
Supplement: Figure 1—figure supplement 6—source data 1. [file elife-63230-fig1-figsupp6-data1.xlsx]

## Sheet: Prey accumulation on mito
Prey accumulation on mitochondria
(ft-f0)/f0
	Magnets (1x) Wt 37C					Magnets (1x) Wt - after 28C
Time (s)	Mean	ES	N		Time (s)	Mean	ES	N
0	0	0	12		0	0	1.5759e-16	17
2	-0.0094903	0.0125016	12		2	0.430426	0.0743324	17
4	-0.0025186	0.00608024	12		4	0.464465	0.0812191	17
6	-0.0096789	0.00882571	12		6	0.509973	0.0907578	17
8	-0.006404	0.00652144	12		8	0.505888	0.0868454	17
10	-0.0023458	0.0113328	12		10	0.50106	0.0910928	17
12	-0.002288	0.00705561	12		12	0.508886	0.0907006	17
14	-0.006266	0.0102541	12		14	0.51279	0.0956067	17
16	-0.0193722	0.0113232	12		16	0.529407	0.0964672	17
18	-0.0185103	0.00944035	12		18	0.526864	0.09388	17
20	-0.0064971	0.00902428	12		20	0.525737	0.0930392	17
22	-0.003693	0.00804771	12		22	0.534136	0.0970706	17
24	-0.0040305	0.0110252	12		24	0.500048	0.0898164	17
26	-0.0105293	0.0100576	12		26	0.529143	0.0961271	17
28	-0.0204223	0.0134314	12		28	0.529215	0.0965829	17
30	-0.0055136	0.012036	12		30	0.519856	0.0924909	17
32	-0.0103354	0.0113209	12		32	0.509726	0.0879753	17
34	-0.0073197	0.00960039	12		34	0.513909	0.0941032	17
36	-0.004653	0.00837355	12		36	0.529662	0.0929026	17
38	-0.0145963	0.00797474	12		38	0.541556	0.0956491	17
40	-0.0126769	0.00904704	12		40	0.527785	0.0918525	17
42	0.00554678	0.0106831	12		42	0.527081	0.095786	17
44	-0.0073624	0.0105186	12		44	0.524114	0.093839	17
46	-0.000928	0.0116369	12		46	0.539045	0.0953175	17
48	0.00956099	0.00929904	12		48	0.518328	0.0954884	17
50	-0.0071646	0.0131137	12		50	0.527018	0.0957036	17
52	-0.003385	0.00972781	12		52	0.517985	0.0968658	17
54	-0.0085466	0.00821498	12		54	0.534814	0.101706	17
56	0.00037655	0.0110876	12		56	0.5267	0.0942527	17
58	0.00053836	0.0116351	12		58	0.515348	0.095853	17
60	0.00084572	0.0113653	12		60	0.524828	0.0942923	17
