# Supplementary material for: Optimized Vivid-derived Magnets photodimerizers for subcellular optogenetics in mammalian cells
Source: eLife. 2020 Nov 11;9:e63230. doi: 10.7554/eLife.63230 (PMC7735757; doi:10.7554/eLife.63230)
Supplement: Figure 1—source data 1. [file elife-63230-fig1-data1.xlsx]

## Sheet: eMagsF 37C
Depletion of cytosolic pool of prey
See materials and methods for details
eMagsF
	Time (s)	Cell1	Cell2	Cell3	Cell4	Cell5	Cell6	Cell7	Cell8	Cell9	Cell10	Cell11	Cell12	Cell13	Average	ES	N
1	0	1	1	1	1	1	1	1	1	1	1	1	1	1	1	0	13
2	2	1.17246	1.0022	1.0012	1.01124	0.986805	1.00303	1.0095	1.06649	0.961624	0.903163	0.996319	1.0103	0.994654	1.00915	0.0168855	13
3	4	1.12088	1.0246	1.01466	1.07337	0.967817	1.00215	1.07976	1.01066	1.00094	0.932191	1.00871	0.965641	1.02503	1.01742	0.0140671	13
4	6	1.17104	1.04106	1.02452	1.00523	1.04705	0.986076	1.08987	0.989891	0.982007	0.931011	1.00351	0.994311	1.01222	1.02137	0.0163095	13
5	8	1.17986	1.0523	0.988004	1.03072	1.0159	1.02736	0.954304	1.0764	1.01475	0.972167	1.0246	1.00012	0.987694	1.02494	0.0157634	13
6	10	1.21358	1.05222	0.986079	1.04233	0.984664	0.994169	1.06553	1.00264	1.00941	0.971159	0.97526	1.00008	0.951233	1.0191	0.0186165	13
7	12	0.903231	0.691304	0.772009	0.914403	0.821176	0.864752	0.846872	0.890754	0.641172	0.775142	0.869763	0.831312	0.69768	0.809198	0.0243477	13
8	14	0.75537	0.613341	0.71996	0.80363	0.813017	0.828674	0.855437	0.875031	0.612709	0.668925	0.836742	0.821855	0.661933	0.758971	0.0258462	13
9	16	0.716054	0.576354	0.671268	0.695404	0.78617	0.82412	0.9143	0.879822	0.607001	0.63413	0.903575	0.789882	0.635677	0.741058	0.0322467	13
10	18	0.626368	0.565156	0.652584	0.743704	0.81575	0.813329	0.878866	0.844049	0.579791	0.608215	0.88508	0.801893	0.604183	0.724536	0.0335519	13
11	20	0.625445	0.546041	0.638542	0.714436	0.795005	0.819551	0.891672	0.832585	0.587085	0.641681	0.893417	0.812861	0.617721	0.724311	0.0336143	13
12	22	0.596939	0.523455	0.632292	0.642665	0.77821	0.816422	0.902631	0.871729	0.589349	0.629115	0.855374	0.812831	0.616832	0.712911	0.0356957	13
13	24	0.588898	0.536443	0.657153	0.667674	0.790757	0.809969	0.842274	0.862999	0.575229	0.640867	0.879734	0.788082	0.610961	0.711618	0.0334373	13
14	26	0.650657	0.532104	0.610717	0.708144	0.779279	0.829689	0.882962	0.819502	0.570542	0.613599	0.87644	0.788862	0.609582	0.713237	0.0338427	13
15	28	0.57957	0.53027	0.621885	0.624958	0.791514	0.828983	0.862986	0.900092	0.588898	0.630244	0.874371	0.781951	0.594175	0.708453	0.0367998	13
16	30	0.642471	0.570879	0.585642	0.687464	0.814403	0.842027	0.848022	0.881519	0.583685	0.636046	0.865172	0.792139	0.611371	0.720065	0.0337172	13
17	32	0.563379	0.536149	0.601291	0.623405	0.782242	0.821	0.883897	0.873494	0.585587	0.622624	0.876511	0.806473	0.589692	0.705057	0.0375407	13
18	34	0.642978	0.540049	0.628219	0.615666	0.831294	0.848924	0.875081	0.855471	0.574253	0.655462	0.881444	0.793496	0.596837	0.718398	0.035899	13
19	36	0.573553	0.526763	0.604711	0.625355	0.815701	0.828269	0.900831	0.841681	0.612485	0.617937	0.871856	0.780645	0.602835	0.707894	0.0366865	13
20	38	0.576466	0.539367	0.57775	0.669704	0.806234	0.804805	0.888349	0.832996	0.596349	0.644334	0.862051	0.788228	0.602658	0.706869	0.0348172	13
21	40	0.596849	0.540234	0.596734	0.633013	0.809927	0.836823	0.894245	0.842248	0.577713	0.669367	0.854696	0.784386	0.613796	0.711541	0.035149	13
22	42	0.560841	0.533788	0.57635	0.671254	0.781647	0.827993	0.885856	0.804797	0.598348	0.643214	0.856468	0.784818	0.601445	0.702063	0.0345829	13
23	44	0.638885	0.552828	0.586547	0.643194	0.826513	0.842313	0.929678	0.879623	0.584812	0.637799	0.865314	0.788951	0.603677	0.721549	0.0374155	13
24	46	0.5864	0.557495	0.607554	0.622236	0.836033	0.850317	0.8811	0.802677	0.595023	0.626981	0.875074	0.794834	0.625662	0.712414	0.0350609	13
25	48	0.601524	0.530656	0.531599	0.715612	0.81791	0.851452	0.892721	0.8613	0.588612	0.616811	0.86133	0.784251	0.616734	0.713116	0.037904	13
26	50	0.564884	0.535841	0.598057	0.679811	0.810571	0.845306	0.878792	0.839298	0.592016	0.649242	0.870158	0.811479	0.598133	0.713353	0.0361968	13
27	52	0.568207	0.543365	0.605695	0.64638	0.810272	0.852931	0.923093	0.842223	0.579715	0.633931	0.849506	0.773407	0.608991	0.710594	0.0369178	13
28	54	0.564734	0.547076	0.567875	0.664655	0.821045	0.893853	0.910341	0.854801	0.583681	0.640454	0.878619	0.798279	0.606992	0.717877	0.0395456	13
29	56	0.634675	0.555072	0.53745	0.6635	0.778715	0.828858	0.858282	0.81933	0.593769	0.641674	0.871067	0.801197	0.595989	0.706121	0.0339345	13
30	58	0.560902	0.541536	0.550318	0.621009	0.847862	0.847255	0.889267	0.834944	0.597599	0.639994	0.863575	0.798526	0.617636	0.708494	0.0381528	13
31	60	0.567067	0.552733	0.581449	0.662603	0.849154	0.855057	0.925208	0.908342	0.603112	0.672124	0.914925	0.783106	0.636467	0.731642	0.0399928	13
32	62	0.588927	0.555465	0.558973	0.648568	0.822257	0.854476	0.890368	0.845172	0.595465	0.645179	0.885469	0.772109	0.62952	0.714765	0.0364754	13
33	64	0.565354	0.556443	0.559345	0.649488	0.827928	0.85906	0.907459	0.846706	0.592286	0.662112	0.877086	0.805208	0.633021	0.718577	0.0377888	13
34	66	0.599421	0.577333	0.555193	0.674821	0.799471	0.893403	0.907399	0.853672	0.609122	0.626405	0.860563	0.788598	0.629229	0.721125	0.0364452	13
35	68	0.533842	0.548588	0.542657	0.711377	0.811061	0.866162	0.923913	0.891214	0.616816	0.644555	0.878618	0.781177	0.631004	0.721614	0.0399711	13
36	70	0.600187	0.566271	0.583724	0.635956	0.84174	0.864068	0.882373	0.857867	0.609446	0.626304	0.897747	0.797648	0.629442	0.722521	0.0368045	13
37	72	0.678314	0.580267	0.629756	0.756704	0.899294	0.898407	0.927866	0.906328	0.672903	0.712254	0.918814	0.843132	0.688118	0.777858	0.0346337	13
38	74	0.695891	0.619248	0.691487	0.755677	0.883325	0.949416	0.99432	0.906716	0.749537	0.75854	0.925868	0.851452	0.722333	0.807985	0.0323864	13
39	76	0.700376	0.617646	0.687627	0.800053	0.929548	0.943115	1.04651	0.910019	0.775752	0.786375	0.931067	0.867701	0.738065	0.825681	0.0343192	13
40	78	0.747958	0.649568	0.758712	0.873108	0.916973	0.935573	1.03163	0.898431	0.811896	0.799787	0.929808	0.887774	0.754232	0.845804	0.0285672	13
41	80	0.819451	0.682023	0.741089	0.933575	0.925082	0.97363	1.06706	1.02346	0.832341	0.84214	0.962463	0.884453	0.785216	0.88246	0.0310941	13
42	82	0.842461	0.655418	0.767511	0.889275	1.02093	0.970857	1.07045	0.917457	0.861802	0.831265	1.00484	0.895743	0.817198	0.888092	0.0312153	13
43	84	0.876341	0.708225	0.797043	0.94249	1.00265	0.970591	1.02744	0.944187	0.928218	0.87544	0.98562	0.927135	0.81601	0.907799	0.0252153	13
44	86	0.802102	0.735109	0.804499	0.904384	0.985486	0.974297	1.08477	0.955645	0.934859	0.877616	0.993456	0.918498	0.855148	0.909682	0.0262583	13
45	88	0.831308	0.792517	0.84191	0.958023	0.986074	0.999739	1.05424	0.989368	0.936168	0.882922	1.01157	0.932338	0.852842	0.928386	0.0225018	13
46	90	0.816059	0.765459	0.809346	1.00864	0.98847	0.983575	1.02344	1.0763	0.900006	0.873527	1.02767	0.933488	0.871389	0.929028	0.0270663	13
47	92	0.861131	0.753432	0.834825	1.04847	1.02601	1.00132	1.02141	0.952833	0.934422	0.912195	0.98974	0.946245	0.903993	0.937386	0.0235244	13
48	94	0.886578	0.77187	0.888753	0.991005	0.992718	1.02468	1.0541	0.978353	0.95764	0.929519	1.01536	0.94452	0.913169	0.949867	0.0206254	13
49	96	0.89592	0.781324	0.883476	0.961047	1.02249	0.990356	1.03644	1.02328	0.959962	0.916512	1.02111	0.964021	0.878673	0.948816	0.0207537	13
50	98	0.972435	0.811762	0.922859	1.05498	1.04608	0.993303	1.07771	1.04783	0.974396	0.911575	1.02589	0.950061	0.917417	0.977407	0.0207988	13
51	100	0.920431	0.837656	0.899854	1.01946	1.01763	0.951908	1.07646	1.00915	0.962355	0.920793	1.0219	0.939487	0.921968	0.961466	0.0179505	13
52	102	0.97049	0.809824	0.922678	0.962671	0.973756	0.981992	1.07366	1.03059	1.004	0.900185	1.00318	0.956247	0.937847	0.963625	0.0179654	13
53	104	0.954528	0.837075	0.887657	1.00059	0.984516	1.01624	1.07352	1.01405	0.996652	0.920911	1.01133	0.955005	0.951811	0.96953	0.017174	13
54	106	0.949417	0.828911	0.933803	0.954015	1.00309	0.977778	1.0349	1.07507	0.973862	0.937978	1.02691	0.96457	0.918749	0.967619	0.0170149	13
55	108	0.97206	0.821649	0.960549	1.11008	0.992436	1.01551	1.11076	1.05612	1.00762	0.927658	1.00937	0.957008	0.956796	0.992124	0.0212231	13
56	110	1.05014	0.851857	0.905221	1.00596	1.03926	1.00656	1.07762	0.982061	0.965414	0.964997	1.01387	0.95258	0.936355	0.980915	0.0170948	13
57	112	1.03213	0.852936	0.919978	1.00726	1.02237	0.990002	1.11764	1.02169	0.990685	0.923311	0.996958	0.977688	0.93662	0.98379	0.0180992	13
58	114	1.04485	0.871205	0.962489	1.05863	1.0143	0.981955	1.12437	1.06356	0.995928	0.953453	1.0325	0.969535	0.946235	1.00146	0.0179946	13
59	116	1.07097	0.866578	0.963856	1.06653	1.03885	0.988118	1.08873	1.06845	0.994218	0.925883	0.988861	0.95501	0.947182	0.997172	0.0184567	13
60	118	1.018	0.876926	0.983562	0.957239	1.03346	0.981305	1.08403	1.08865	0.98148	0.985096	1.0151	0.965933	0.954915	0.994285	0.0155088	13
61	120	1.01943	0.866631	1.01927	1.00786	1.08243	0.953025	1.07733	1.0386	0.969778	0.900198	1.0142	0.969167	0.938222	0.988934	0.0177807	13
62	122	1.06994	0.910663	0.940337	1.00583	1.09141	0.985055	1.05687	1.03905	0.938889	0.941678	0.982031	0.965065	0.92693	0.988749	0.0164428	13
63	124	1.00879	0.87312	0.942785	1.07841	0.97675	0.982177	1.0367	1.01843	0.988029	0.953124	1.0157	0.969172	0.946357	0.983811	0.0141307	13
64	126	1.07307	0.83232	0.923243	1.06809	1.02102	1.00622	1.08323	1.13669	1.00602	0.935755	0.978384	0.971969	0.961343	0.999797	0.0222149	13
65	128	1.04018	0.85028	0.952889	1.00346	1.00996	1.01106	1.05343	1.04385	0.992826	0.962867	0.980151	0.95184	0.946705	0.984577	0.0150112	13
66	130	1.09202	0.885944	0.992893	0.947811	1.01743	1.01817	1.06311	1.09588	0.998975	0.942606	1.01303	0.975928	0.956162	0.999997	0.0167994	13
67	132	1.04525	0.914557	0.954965	1.0359	1.05756	0.991503	1.06365	1.10695	1.0196	0.94414	0.989253	0.967867	0.923983	1.00117	0.0163992	13
68	134	1.01719	0.888725	1.0003	1.04536	1.02309	1.02077	1.1168	1.08962	0.970631	0.90403	0.999089	0.980928	0.929905	0.998956	0.0183817	13
69	136	1.04358	0.904224	1.02833	1.02678	0.988596	1.01513	1.05663	1.1051	1.01936	0.96735	0.978876	0.962839	0.942611	1.00303	0.014686	13
70	138	0.966497	0.886538	0.998679	1.03562	1.06341	1.00212	1.09725	1.02053	0.986974	0.905364	0.982886	0.960713	0.949967	0.988966	0.0162222	13
71	140	1.04416	0.88902	0.963079	0.963186	1.01526	1.01523	1.06194	1.10522	0.988555	0.929508	0.991723	0.950924	0.918103	0.987378	0.016903	13
72	142	1.04316	0.883152	0.998893	1.116	1.0101	0.989235	1.08506	1.05018	0.980962	0.913844	1.00485	0.956665	0.93543	0.997504	0.0183836	13
73	144	1.09479	0.851039	0.987102	1.07413	1.0378	1.02326	1.06413	1.11628	0.960634	0.94426	0.985468	0.968878	0.947033	1.00422	0.020389	13
74	146	1.0415	0.884148	0.913615	1.07922	1.06758	1.00994	1.10569	1.18597	1.01482	0.950679	0.959377	0.961775	0.933782	1.00831	0.0238251	13
75	148	1.06268	0.874101	1.01409	1.08343	1.02222	1.00589	1.09944	1.15298	0.997191	0.92437	1.02732	0.966565	0.968811	1.01531	0.0206112	13
76	150	1.00688	0.910012	1.03949	1.03001	0.990787	1.0077	1.06867	1.16778	0.995014	0.94814	0.941272	0.952203	0.940901	0.999913	0.0188715	13
77	152	1.01821	0.897475	0.996939	1.0327	1.02834	1.00975	1.09726	1.11114	0.953024	0.937353	0.960169	0.954293	0.935196	0.994758	0.0175926	13
78	154	1.08706	0.925675	0.976137	1.09187	1.01812	1.01856	1.05983	1.18478	0.986269	0.954035	0.945614	0.964995	0.951736	1.01267	0.0207606	13
79	156	1.06261	0.877094	0.964591	1.02726	1.00116	1.01779	1.045	1.23973	0.971825	0.886733	0.932245	0.930593	0.931219	0.991373	0.0262666	13
80	158	0.996514	0.925739	1.00824	1.08488	1.00363	1.02213	1.10808	1.16799	0.969055	0.948888	0.988226	0.949387	0.937453	1.00848	0.0200082	13
81	160	1.07803	0.89803	1.0111	1.07008	0.987222	1.01706	1.10232	1.12537	1.01659	0.903651	0.971468	0.92716	0.923436	1.00242	0.0211263	13
82	162	1.12857	0.862351	1.01714	0.960221	1.04495	1.02626	1.13175	1.16359	1.00927	0.944462	0.982509	0.965449	0.9353	1.01322	0.0241216	13
83	164	1.16154	0.861695	0.955719	1.04338	0.942549	0.99809	1.09813	1.18421	0.995017	0.930971	0.986567	0.970685	0.971858	1.00772	0.0255424	13
84	166	1.11642	0.898491	0.950603	1.05305	1.01795	0.994292	1.13469	1.10928	1.02298	0.95635	0.978419	0.969569	0.947351	1.0115	0.0203224	13
85	168	1.04146	0.908307	0.971635	1.03207	1.06185	1.03843	1.10817	1.15676	0.967754	0.94077	0.978878	0.978268	0.952386	1.01052	0.0195838	13
86	170	1.03215	0.885371	0.998153	1.09881	1.0503	1.00065	1.1178	1.19676	0.974434	0.931434	1.02551	0.94807	0.956037	1.01658	0.0234963	13
87	172	1.07412	0.890227	0.957695	1.03256	0.992559	1.03013	1.02337	1.13117	0.982433	0.926416	0.99447	0.932037	0.916844	0.991079	0.0188383	13
88	174	0.992381	0.872978	0.946618	0.99705	0.965705	1.05265	1.11869	1.12342	1.01143	0.906391	0.934226	0.966292	0.928953	0.985907	0.0210525	13
89	176	1.13162	0.853613	0.991613	0.975622	1.00611	1.02046	1.1075	1.15124	1.01504	0.927439	0.988689	0.970315	0.952436	1.00705	0.0229854	13
90	178	1.08453	0.882122	0.994984	1.03721	1.05634	1.05493	1.11309	1.13112	1.03992	0.97586	1.00333	0.962845	0.936946	1.02102	0.0196811	13
91	180	1.03051	0.879302	1.00666	1.04695	1.03804	1.03748	1.09736	1.15666	1.03681	0.929137	1.00241	0.9506	0.930899	1.01099	0.0206698	13
92	182	1.02415	0.89642	0.984023	1.03445	1.0103	1.03814	1.09806	1.11148	0.999988	0.950496	0.993705	0.975216	0.94396	1.00465	0.0164716	13
93	184	1.08972	0.907474	0.966005	1.01229	0.999417	1.01603	1.13339	1.19374	0.990491	0.935043	0.987319	0.962935	0.910211	1.008	0.0235577	13
94	186	1.09343	0.857864	1.01927	0.992914	0.990275	1.00524	1.0499	1.20742	0.974368	0.956947	0.977693	0.940833	0.945842	1.00092	0.0232624	13
95	188	1.0598	0.885421	1.0198	0.933067	1.04262	1.02445	1.0974	1.25341	1.04463	0.95681	0.969094	0.959252	0.958541	1.01571	0.0256548	13
96	190	1.08057	0.911521	0.943698	1.01098	0.977133	1.01548	1.05665	1.17047	0.947581	0.949417	0.957359	0.97917	0.945906	0.995841	0.0197585	13
97	192	1.04086	0.920774	1.0142	0.992915	0.996996	1.02725	1.08877	1.17425	0.983681	0.956452	1.00718	0.981652	0.951037	1.01046	0.0180309	13
98	194	1.05022	0.881429	0.97751	0.955244	1.02774	1.02146	1.10078	1.17916	1.00147	0.942031	0.95608	0.982463	0.927871	1.00027	0.0216879	13
99	196	1.04189	0.907987	0.907085	0.99572	1.03037	1.01968	1.08445	1.18223	1.01128	0.942988	1.00505	0.962058	0.934976	1.00198	0.0211139	13
100	198	0.990038	0.927469	0.99498	0.99148	1.00014	1.0332	1.04536	1.18843	0.967935	0.969582	0.99764	0.976799	0.941067	1.00186	0.0179116	13
101	200	0.955765	0.901421	0.981109	1.02368	0.990477	1.03907	1.06174	1.28462	0.989638	0.934618	0.980992	0.963037	0.961787	1.00523	0.0260972	13
102	202	0.953823	0.90699	0.94902	1.00836	1.03815	1.0617	1.0902	1.18869	0.962573	0.965133	0.978856	0.961606	0.955805	1.00161	0.0210175	13
103	204	1.0342	0.859036	0.973476	1.02261	0.931536	1.04257	1.09095	1.23986	1.00575	0.930239	0.997582	0.96879	0.954197	1.00391	0.0256128	13
104	206	1.01117	0.909822	0.971154	0.990577	1.0282	1.02081	1.00669	1.12708	1.00821	0.939203	0.956663	0.981255	0.929983	0.990833	0.0152761	13
105	208	0.954327	0.901642	0.953072	0.997125	1.00953	1.03528	1.04883	1.10742	0.985779	0.963654	1.00579	0.999601	0.933411	0.991959	0.0148455	13
106	210	1.02946	0.895798	0.98904	0.937795	0.9821	1.05333	1.07744	1.13076	0.980173	0.9282	1.01687	0.966047	0.951744	0.99529	0.0180813	13
107	212	1.0074	0.932323	1.00598	0.954584	0.945102	1.04453	1.10992	1.14827	0.980721	0.942008	1.03606	0.958626	0.952132	1.00136	0.0187443	13
108	214	0.987278	0.869231	1.01607	1.02895	1.03273	1.03587	1.05416	1.18838	1.00183	0.94244	0.955973	0.960617	0.928306	1.00014	0.0213462	13
109	216	0.95655	0.896036	1.02444	1.06406	1.02291	1.03184	1.0291	1.19104	0.941387	0.95975	0.981566	0.939433	0.977635	1.00121	0.0205411	13
110	218	0.973907	0.883671	0.982594	1.06298	0.964797	1.03398	1.06667	1.16638	1.0103	0.941961	0.988595	0.958637	0.94717	0.998587	0.0197879	13
111	220	1.00477	0.89376	0.947396	1.07631	1.00586	1.02659	1.07975	1.15907	1.02193	0.955002	0.984714	0.965263	0.94626	1.00513	0.0194144	13
112	222	0.989688	0.859284	1.05448	1.0029	0.991118	1.05516	1.04225	1.11038	0.954711	0.931204	1.01463	0.978308	0.939647	0.994134	0.0180165	13
113	224	1.02069	0.884594	0.976153	1.01357	0.98432	1.04385	1.0195	1.14219	1.00137	0.914545	0.98457	0.97469	0.951923	0.993228	0.0173881	13
114	226	0.966018	0.93612	0.973235	1.06186	0.968068	1.01653	1.10266	1.07486	0.965424	0.891555	0.98715	0.972283	0.945896	0.989358	0.0165172	13
115	228	1.01152	0.862517	0.967088	0.968849	0.950878	1.05365	1.01561	1.19522	1.0061	0.942921	0.984147	0.982134	0.92377	0.989568	0.0216313	13
116	230	0.986071	0.871736	0.973413	1.09325	0.987089	1.05208	1.0434	1.16227	1.00054	0.941032	1.01457	0.992906	0.946917	1.00502	0.0201549	13
117	232	1.03869	0.914384	0.948448	0.970216	0.923183	1.04921	1.05943	1.12302	0.99033	0.96169	0.987331	0.979697	0.952039	0.992128	0.0166001	13
118	234	1.01285	0.893799	0.96775	1.00056	1.00446	1.0299	1.06701	1.23724	0.954558	1.02726	0.963361	0.967754	0.928141	1.0042	0.0232458	13
119	236	1.02115	0.900876	0.982839	1.01127	0.989774	1.01903	1.04688	1.06539	0.966772	0.93963	0.978767	1.00244	0.953961	0.990676	0.0123596	13
120	238	1.0001	0.892921	0.982234	1.04658	0.950893	1.05063	1.08208	1.18457	0.96474	0.990198	0.984277	0.989438	0.956634	1.00579	0.0200754	13
121	240	1.09903	0.907613	0.962714	1.00126	1.00731	1.0327	1.05786	1.10664	1.00564	0.951154	0.963283	1.00113	0.94556	1.00322	0.016442	13
122	242	1.05172	0.900067	0.956263	0.972961	1.01695	1.03428	1.08253	1.15718	1.0147	0.980662	1.01152	1.00643	0.926057	1.00856	0.0185297	13
123	244	1.12411	0.901809	0.989178	1.02681	0.87524	1.04719	1.01271	1.23937	0.960945	1.00311	1.03007	0.987525	0.967143	1.01271	0.0256589	13
124	246	0.984651	0.896849	0.974349	1.01253	0.983258	1.01949	1.07296	1.10172	1.00646	0.941336	0.996987	0.982976	0.94318	0.993596	0.0148708	13
125	248	1.04734	0.897937	0.958279	0.919876	0.977851	1.01432	1.05585	1.13929	0.943871	0.947007	0.987675	0.983168	0.947907	0.986182	0.0180207	13
126	250	0.969916	0.880892	0.976167	1.03383	1.02966	1.00286	1.05266	1.17122	0.97346	0.950622	0.970907	1.01102	0.95084	0.998004	0.0189901	13
127	252	1.0264	0.897473	0.991535	1.0126	0.988906	0.988405	1.06553	1.20956	1.01502	0.974443	0.977817	0.992386	0.948768	1.00683	0.0201524	13
128	254	1.03962	0.858494	0.950102	0.991831	1.02249	1.00152	0.984317	1.16051	1.01671	0.986839	0.956173	1.01282	0.940879	0.994024	0.0189867	13
129	256	1.00387	0.897798	0.982889	0.961601	0.978119	1.02115	1.09655	1.03982	0.990614	0.95094	0.947096	0.970541	0.914554	0.981195	0.014528	13
130	258	1.05894	0.886302	0.987008	0.946329	0.938167	1.03137	1.01085	1.16408	0.995694	0.928103	0.987495	1.02764	0.935572	0.99212	0.0197341	13
131	260	1.06084	0.916785	0.971787	0.973196	1.02565	0.995458	1.08349	1.19556	0.99897	0.963469	0.994676	0.991415	0.953366	1.00959	0.0196849	13
132	262	1.06321	0.87895	0.977671	0.992054	1.01435	0.998944	1.10323	1.22168	1.00118	0.956871	0.936152	1.02118	0.940631	1.00816	0.0237863	13
133	264	1.01439	0.893695	0.955425	0.939489	1.02161	1.00608	1.07678	1.16791	1.00601	0.924768	0.954276	1.0075	0.943617	0.993197	0.0199633	13
134	266	1.08972	0.868183	1.0156	0.993455	0.927416	1.01338	1.08603	1.11353	1.00566	0.939359	0.946394	1.01558	0.960227	0.998042	0.0195803	13
135	268	1.05675	0.862011	0.992486	0.941068	0.983574	1.02173	1.08069	1.16094	0.951027	0.938475	0.963525	0.947163	0.961413	0.989296	0.021069	13
136	270	1.0632	0.967469	0.968422	0.893072	0.988676	0.991341	1.11603	1.16555	1.00128	0.937916	0.961218	1.00688	0.929048	0.999238	0.0210294	13
137	272	1.01545	0.930154	1.01082	0.97665	1.00827	0.999479	1.06378	1.2124	0.990821	0.930599	0.919889	1.01458	0.935347	1.00063	0.0212941	13
138	274	1.13976	0.907853	0.996652	0.983491	0.988127	1.01134	1.05324	1.14252	0.993368	0.932544	0.962346	1.0119	0.922509	1.00351	0.0202106	13
139	276	1.09612	0.938242	0.984998	0.918647	0.985373	0.991384	1.06887	1.18601	0.987744	1.01091	0.917051	1.01877	0.960358	1.00496	0.0209215	13
140	278	1.08408	0.923343	0.952438	0.886654	0.915002	0.979175	1.02568	1.16031	0.957758	0.916383	0.944908	1.03372	0.929385	0.977603	0.0217038	13
141	280	1.06851	0.942261	0.988618	0.908808	0.988509	1.03099	1.08673	1.08308	0.966743	0.953033	0.957522	1.00244	0.913915	0.991628	0.0167203	13
142	282	1.07867	0.903938	1.00362	0.926245	0.971498	1.00941	1.05122	1.15117	0.973006	0.967649	0.947643	0.999403	0.943953	0.994418	0.0186912	13
143	284	1.11398	0.900966	0.996162	0.911119	0.978649	0.989792	1.02566	1.15565	0.998865	1.00684	0.951936	1.01145	0.946571	0.999049	0.0198538	13
144	286	1.09444	0.955105	1.00957	0.9927	0.931683	0.98726	1.06698	1.22037	0.939927	0.964562	0.938191	0.977872	0.957523	1.00278	0.0226225	13
145	288	1.09966	0.942167	0.942723	0.835337	0.966295	0.985686	1.04032	1.17629	1.0282	0.935623	0.955178	1.02082	0.953778	0.99093	0.0235023	13
146	290	1.02562	0.90806	0.990935	0.892876	0.90618	1.01051	1.04631	1.11749	0.965605	0.951621	0.932361	1.02166	0.90372	0.974842	0.0188002	13
147	292	1.06822	0.940925	1.0004	0.918647	0.939628	1.01792	1.12133	1.12525	1.00828	0.975487	0.96196	1.02118	0.954277	1.00411	0.0185312	13
148	294	1.0915	0.91993	0.954124	0.95798	0.931584	1.00823	1.08047	1.09283	1.00939	0.974008	0.929147	1.03202	0.924525	0.992749	0.0179596	13
149	296	0.980283	0.918853	0.948174	0.854043	1.08204	1.01167	1.02733	1.09208	1.01528	0.920815	0.927193	1.01775	0.958288	0.981062	0.0189894	13
150	298	1.08051	0.923185	1.01406	0.93279	0.922017	1.00277	1.01815	1.15512	0.977464	0.961448	0.903335	1.02682	0.926648	0.988024	0.0201201	13
151	300	1.03681	0.943392	0.952613	0.871117	0.930389	1.03251	1.06853	1.16817	0.995166	0.960455	0.957056	1.00352	0.908859	0.986814	0.0214514	13
152	302	1.05776	0.958359	0.933342	0.944596	0.954601	1.01672	0.974202	1.11284	0.948656	0.944703	0.903335	1.02697	0.941521	0.978277	0.0162853	13
153	304	1.041	0.93958	1.03342	0.863119	1.00895	1.01401	1.07273	1.13068	0.92949	0.926919	0.954226	1.0157	0.959182	0.991462	0.019807	13
154	306	1.02882	0.959126	0.986016	0.832713	1.05579	0.97738	1.05785	1.12792	1.0473	0.975224	0.962481	1.03202	0.946456	0.999161	0.019961	13
155	308	1.07744	0.958595	0.992203	0.976622	1.01825	1.01695	0.971027	1.09727	0.969426	0.930083	0.952503	1.03417	0.936782	0.994717	0.0143491	13
156	310	1.08733	0.959642	0.970696	0.902311	1.02795	0.998881	1.09934	1.23982	0.989041	0.970291	0.918523	1.0057	0.935564	1.00808	0.0251661	13
157	312	1.12876	0.912489	0.981882	0.879316	1.05026	1.02598	1.03378	1.14478	0.94801	1.03522	0.937912	1.0285	0.927076	1.00261	0.0223999	13
158	314	1.02847	0.926383	1.00905	0.938992	1.011	0.9848	1.02882	1.13993	1.0356	0.976343	0.960884	1.02012	0.930583	0.999306	0.0158863	13
159	316	1.15439	0.908621	0.958895	0.986803	0.951307	1.02094	1.12757	1.18263	0.96322	0.991737	0.930987	1.03743	0.974016	1.0145	0.0242862	13
160	318	1.114	0.923623	0.929686	0.912068	0.966734	1.01536	1.02927	1.16821	1.00364	0.939674	0.941716	1.03453	0.941669	0.993861	0.0216552	13
161	320	1.08576	0.949011	1.01283	0.948111	1.00787	1.00612	1.02317	1.18049	1.00449	0.967521	0.932349	0.98217	0.93144	1.00241	0.019051	13
162	322	1.05128	0.942873	0.989735	0.872478	1.09357	1.00341	1.02871	1.14662	0.983637	0.97396	0.9551	1.02292	0.962247	1.00204	0.0193163	13
163	324	1.07409	0.917363	1.01765	0.858606	0.977295	0.99977	1.03784	1.09361	0.967518	0.941124	0.963353	0.993618	0.920534	0.98172	0.0181177	13
164	326	1.06089	0.892238	0.976155	0.919196	0.977146	0.984692	0.993318	1.1534	0.97609	0.956197	0.92752	1.03015	0.932076	0.983005	0.0189907	13
165	328	1.1258	0.915283	1.00469	0.961397	0.954702	1.00654	1.01112	1.20932	0.986051	1.01505	0.921647	0.998603	0.936756	1.00361	0.0227783	13
166	330	1.14479	0.916202	1.01508	0.905815	0.943783	1.01454	1.03709	1.12766	1.00141	0.998138	0.965396	1.01525	0.917153	1.00018	0.0206351	13
167	332	1.11847	0.906662	0.942646	0.888153	0.970018	1.01681	1.09856	1.09528	0.966065	0.971274	0.978234	1.04265	0.93281	0.994434	0.0207088	13
168	334	1.05774	0.948375	0.974937	0.943349	0.923653	1.02074	1.03514	1.17125	1.00588	0.973083	0.931053	1.01883	0.910703	0.993441	0.0196016	13
169	336	1.05358	0.944073	0.979721	0.931395	0.967747	1.01057	1.04006	1.16412	1.00931	0.939877	0.93825	1.01967	0.97307	0.997804	0.0177903	13
170	338	1.11045	0.946459	0.968076	0.846089	0.947441	1.03176	1.09294	1.29947	0.990929	0.914234	0.985021	1.03554	0.914242	1.00636	0.0317863	13
171	340	1.14168	0.883253	0.912704	0.840999	1.00867	1.03705	1.03558	1.13553	0.968739	0.986579	0.967846	1.0571	0.912231	0.991382	0.0253029	13
172	342	1.03392	0.876401	0.962863	0.915736	0.958541	1.00263	1.05994	1.11863	1.03026	0.99262	0.968904	1.04818	0.945668	0.993406	0.0180708	13
173	344	1.03268	0.934947	1.03873	0.872847	0.960216	0.99717	1.03565	1.14344	1.01706	0.980653	0.971849	1.04776	0.915723	0.996056	0.0191224	13
174	346	1.13324	0.899034	0.951434	0.929654	0.959539	1.0015	1.072	1.22217	0.993147	0.915045	1.0146	1.01166	0.97455	1.00597	0.0252213	13
175	348	1.15204	0.909912	1.02585	0.86099	1.03838	1.03899	1.06004	1.11416	0.99227	0.981416	0.936711	1.02818	0.956274	1.00732	0.0222562	13
176	350	1.10621	0.896906	0.997165	0.847215	0.967717	1.04179	1.01785	1.15735	0.973273	0.959569	0.955975	1.01582	0.924789	0.989356	0.0229056	13
177	352	1.08148	0.9243	0.957069	0.883904	1.00339	1.06329	1.03286	1.20558	0.972309	1.00224	0.995605	1.00657	0.916816	1.00349	0.0230172	13
178	354	1.12279	0.910445	0.972996	0.905084	1.06074	1.01644	1.02632	1.11647	0.968101	1.0081	0.984977	0.992186	0.920091	1.00037	0.0194159	13
179	356	1.10471	0.944838	0.96995	0.900801	1.00707	1.01259	1.0513	1.18093	0.947109	0.962941	0.925028	1.03442	0.95301	0.999592	0.0217076	13
180	358	1.05617	0.900683	0.988693	0.904456	0.96756	1.00438	1.06158	1.1009	1.04792	0.972602	0.96276	1.00179	0.911981	0.990883	0.0176184	13
181	360	1.16081	0.907204	1.02813	0.837834	0.982886	1.0158	1.0968	1.07536	1.00375	0.993708	0.972978	1.01322	0.92943	1.00138	0.0230752	13
182	362	1.09866	0.919612	1.0421	0.832464	0.990445	1.02498	1.06786	1.05763	1.01555	0.976746	0.971339	1.01388	0.914502	0.994289	0.0201532	13
183	364	1.16776	0.945245	0.963999	0.839504	0.916594	1.02257	1.1055	1.10528	0.9854	0.963915	0.991316	1.02709	0.923008	0.996706	0.0248051	13
184	366	1.09054	0.940658	0.983559	0.91722	0.967003	1.00929	1.06221	1.03024	0.992787	0.97922	0.958729	0.970619	0.946457	0.988349	0.0136237	13
185	368	1.13821	0.911822	0.983944	0.925726	1.04515	1.02175	0.96966	1.10834	1.00597	0.976759	0.932804	1.01808	0.934069	0.997868	0.019203	13
186	370	1.08413	0.933316	1.04554	0.931167	1.02049	1.04363	0.98156	1.11084	1.00302	0.984626	0.968352	1.00233	0.929822	1.00299	0.0158816	13
187	372	1.16776	0.919415	0.992436	0.876633	0.947909	0.995634	0.977437	1.09322	0.974763	0.94927	0.964911	1.00533	0.92465	0.983797	0.0209668	13

## Sheet: eMags 37C
Depletion of cytosolic pool of prey
eMags
											x
	Time (s)	Cell1	Cell2	Cell3	Cell4	Cell5	Cell6	Cell7	Cell8	Cell9	Cell10	Cell11	Cell12	Cell13	Cell14	Average	ES	N
1	0	1	1	1	1	1	1	1	1	1	1	1	1	1	1	1	0	14
2	2	1.02555	1.01241	1.04093	1.01278	0.971123	0.978567	1.01651	1.02294	1.0588	1.01915	1.01031	1.03461	0.993198	0.984316	1.01294	0.00655192	14
3	4	1.1876	0.967092	1.02478	1.00879	1.05787	0.977057	1.01329	1.06617	1.00878	0.986321	0.976112	0.979258	1.0109	1.00045	1.01889	0.0151522	14
4	6	1.00726	1.00921	0.985427	1.01574	1.09306	0.983276	0.991846	1.05048	0.999459	0.972522	0.977101	0.977738	1.02034	0.991149	1.00533	0.00877708	14
5	8	1.05981	1.02344	0.935105	1.01136	1.05641	0.941786	1.01296	1.04461	1.01053	0.957792	0.946543	1.06009	1.03912	0.96601	1.00468	0.0123892	14
6	10	0.967488	1.01245	1.04335	1.00358	1.04944	0.97082	0.983986	1.05442	1.11176	0.9724	1.02764	1.01697	1.03932	1.00624	1.01856	0.0106602	14
7	12	0.814236	0.805326	0.707911	0.860873	0.839235	0.894644	0.901893	0.703628	0.902256	0.919959	0.718653	0.87136	0.888919	0.719449	0.824882	0.0215941	14
8	14	0.744432	0.766428	0.749074	0.791216	0.680857	0.863543	0.845903	0.633485	0.720669	0.91313	0.612489	0.817537	0.743521	0.667519	0.753557	0.023447	14
9	16	0.665887	0.724821	0.660123	0.796586	0.637956	0.874546	0.805472	0.586818	0.726751	0.859011	0.535367	0.758151	0.716218	0.664009	0.715123	0.02629	14
10	18	0.594039	0.707259	0.656084	0.803387	0.617906	0.8428	0.814151	0.584248	0.654326	0.885047	0.517875	0.761388	0.684332	0.646743	0.697827	0.0290642	14
11	20	0.715799	0.7519	0.70634	0.778064	0.577319	0.866939	0.807164	0.593405	0.637236	0.875431	0.515563	0.776737	0.653769	0.664582	0.708589	0.0288824	14
12	22	0.646793	0.756025	0.591682	0.785038	0.550954	0.877058	0.780986	0.549158	0.60506	0.888347	0.525642	0.774601	0.631395	0.655153	0.686992	0.0325318	14
13	24	0.630774	0.710112	0.632045	0.804105	0.563774	0.866593	0.785679	0.560451	0.61682	0.883824	0.513178	0.74252	0.63396	0.627557	0.683671	0.0311654	14
14	26	0.6033	0.714537	0.638135	0.805467	0.544885	0.855982	0.784062	0.536762	0.635669	0.871975	0.540482	0.778913	0.625956	0.629979	0.683293	0.0313157	14
15	28	0.659597	0.716294	0.662712	0.795416	0.532506	0.866106	0.773844	0.519379	0.60331	0.896453	0.520908	0.748261	0.633753	0.640971	0.683536	0.0325255	14
16	30	0.66931	0.673146	0.586147	0.765279	0.537064	0.854417	0.789041	0.53635	0.583114	0.911774	0.544935	0.748714	0.584643	0.647706	0.673689	0.0327552	14
17	32	0.656976	0.703865	0.571174	0.754086	0.495586	0.859138	0.783842	0.526527	0.57279	0.879228	0.554817	0.765541	0.599398	0.61806	0.667216	0.0332396	14
18	34	0.626179	0.744903	0.744306	0.785094	0.482135	0.852054	0.794426	0.553931	0.568368	0.873086	0.538034	0.766933	0.590388	0.628628	0.682033	0.033814	14
19	36	0.563663	0.692787	0.689977	0.778481	0.498036	0.851869	0.77336	0.548754	0.555119	0.874271	0.554757	0.769683	0.618165	0.617824	0.670482	0.0327808	14
20	38	0.612116	0.707055	0.657151	0.771371	0.512006	0.878834	0.754109	0.514603	0.536799	0.861315	0.529684	0.755576	0.613445	0.624767	0.666345	0.0332634	14
21	40	0.598324	0.73221	0.646563	0.774393	0.505768	0.893719	0.76111	0.553817	0.544739	0.876179	0.549894	0.773794	0.587643	0.635374	0.673823	0.0340049	14
22	42	0.596781	0.729562	0.629089	0.774294	0.537169	0.853176	0.771278	0.523119	0.569291	0.905528	0.561925	0.792131	0.609172	0.654624	0.679081	0.0331067	14
23	44	0.607385	0.71943	0.704551	0.779004	0.513141	0.882775	0.750634	0.538186	0.540891	0.859226	0.556115	0.754609	0.591395	0.639528	0.674062	0.0325369	14
24	46	0.618036	0.746309	0.614876	0.80858	0.50549	0.857291	0.766675	0.528898	0.502669	0.856442	0.535871	0.772964	0.607343	0.627455	0.667778	0.0347031	14
25	48	0.520633	0.721463	0.644015	0.763538	0.505199	0.874213	0.767867	0.543856	0.534082	0.864654	0.529873	0.772042	0.599581	0.624432	0.661818	0.034866	14
26	50	0.512029	0.708701	0.610668	0.766613	0.495165	0.862504	0.75447	0.539014	0.55715	0.845038	0.521951	0.760745	0.594423	0.636997	0.654676	0.0338277	14
27	52	0.643527	0.717661	0.623619	0.756422	0.560745	0.872559	0.757243	0.54872	0.518393	0.857449	0.541605	0.751628	0.60286	0.634769	0.670514	0.0309994	14
28	54	0.581549	0.784925	0.658523	0.792292	0.513004	0.873723	0.760208	0.547691	0.531247	0.858863	0.528522	0.780161	0.595528	0.636847	0.674506	0.0346728	14
29	56	0.576555	0.695399	0.688055	0.775554	0.536114	0.866158	0.749799	0.554005	0.556915	0.850486	0.526663	0.764176	0.605094	0.645721	0.670764	0.0311539	14
30	58	0.62729	0.698162	0.68221	0.775926	0.540976	0.869914	0.746947	0.546739	0.541949	0.861535	0.544673	0.775475	0.6033	0.662129	0.676945	0.0310497	14
31	60	0.602593	0.729073	0.572455	0.779692	0.526943	0.865305	0.751899	0.547956	0.532862	0.835398	0.547116	0.785245	0.622404	0.621764	0.665765	0.0321978	14
32	62	0.557483	0.676796	0.580053	0.766439	0.517791	0.863965	0.745748	0.546365	0.51307	0.868307	0.519398	0.777208	0.609549	0.649879	0.656575	0.0340954	14
33	64	0.70892	0.675639	0.775447	0.764926	0.521635	0.884643	0.754512	0.534879	0.531285	0.867516	0.58365	0.753016	0.600701	0.639552	0.685451	0.0323231	14
34	66	0.557042	0.708962	0.638845	0.784885	0.504604	0.880523	0.764509	0.51947	0.522025	0.86163	0.551839	0.769427	0.592124	0.659224	0.665365	0.0347724	14
35	68	0.607291	0.70696	0.595875	0.792382	0.496317	0.871119	0.746897	0.541727	0.516588	0.862749	0.54886	0.775337	0.59291	0.675887	0.666493	0.0340504	14
36	70	0.593873	0.717704	0.722947	0.763338	0.552093	0.871274	0.762363	0.543947	0.552691	0.85452	0.541613	0.744547	0.604955	0.660229	0.677578	0.0307232	14
37	72	0.615851	0.785991	0.658461	0.816089	0.553567	0.893022	0.780623	0.62607	0.548152	0.883368	0.60426	0.809391	0.664372	0.718248	0.711247	0.0312724	14
38	74	0.750192	0.805995	0.833601	0.824371	0.610672	0.888867	0.78004	0.651363	0.622585	0.876114	0.648728	0.82635	0.674168	0.741171	0.752444	0.0255654	14
39	76	0.682072	0.838191	0.761768	0.880829	0.613349	0.919339	0.798206	0.674306	0.643324	0.898929	0.689936	0.86953	0.729509	0.762152	0.768674	0.0269502	14
40	78	0.777367	0.858925	0.877348	0.864517	0.67261	0.930011	0.796954	0.707468	0.667921	0.889477	0.709669	0.878492	0.750378	0.798196	0.798524	0.0232093	14
41	80	0.72882	0.905499	0.881064	0.871665	0.712384	0.933251	0.80612	0.747866	0.648011	0.889709	0.738437	0.889644	0.78873	0.798374	0.80997	0.0231816	14
42	82	0.719929	0.883565	0.853225	0.886478	0.728941	0.938152	0.815154	0.772167	0.711953	0.908407	0.750587	0.922143	0.797742	0.807122	0.821112	0.0209036	14
43	84	0.864399	0.920629	0.876122	0.914116	0.732214	0.956252	0.817642	0.808843	0.707384	0.915659	0.774487	0.895662	0.823123	0.837621	0.846011	0.0197489	14
44	86	0.882524	0.954342	0.903665	0.921666	0.771865	0.954447	0.838593	0.804495	0.740745	0.883037	0.771481	0.97672	0.872669	0.865226	0.867248	0.0197523	14
45	88	0.918065	0.933872	0.923753	0.944757	0.818343	0.931506	0.864503	0.836485	0.793465	0.899313	0.80169	0.94559	0.839042	0.832661	0.87736	0.0150391	14
46	90	0.780353	0.941247	1.01046	0.926123	0.823471	0.955687	0.866736	0.830947	0.758459	0.909028	0.784922	0.955386	0.895743	0.882093	0.880047	0.0202898	14
47	92	0.893524	0.969694	1.00659	0.932857	0.832584	0.959547	0.868239	0.84252	0.786686	0.928834	0.824403	0.966796	0.888651	0.901396	0.900166	0.0171809	14
48	94	0.923778	1.02002	1.01146	0.953608	0.836861	0.961196	0.85023	0.864563	0.788467	0.927004	0.892257	1.00217	0.925248	0.914118	0.919355	0.0183061	14
49	96	0.941507	0.950118	0.975729	0.993285	0.90103	0.968253	0.859696	0.892937	0.852972	0.933029	0.853798	0.980286	0.926842	0.879709	0.922085	0.0130914	14
50	98	0.879001	0.987059	1.06235	0.955247	0.859728	0.959386	0.872169	0.919201	0.825499	0.909467	0.842679	0.986866	0.938906	0.890738	0.920593	0.0175186	14
51	100	1.02747	0.990091	0.97938	0.926066	0.879955	0.973099	0.888022	0.902091	0.833155	0.946994	0.8556	1.00982	0.952357	0.932162	0.935447	0.0155718	14
52	102	0.929493	0.997092	1.02996	0.97366	0.956573	0.958618	0.874548	0.896376	0.827624	0.918876	0.878451	0.99745	0.951404	0.912171	0.935878	0.0148682	14
53	104	0.961574	0.991983	1.10846	0.951207	0.939977	0.971765	0.863999	0.917717	0.850099	0.954017	0.905153	1.00185	0.969146	0.938341	0.951806	0.0167679	14
54	106	0.87553	0.934813	1.10441	0.963138	0.917915	0.976151	0.876025	0.920447	0.877704	0.929044	0.863303	1.00914	0.988272	0.928013	0.940279	0.0174084	14
55	108	0.997767	0.965596	1.07442	0.965725	0.970526	0.982219	0.874169	0.949941	0.922649	0.941734	0.854566	1.02024	0.971122	0.957348	0.960573	0.0146865	14
56	110	0.919552	1.03173	1.07044	0.98041	0.942243	0.990005	0.886532	0.965298	0.894886	0.921122	0.885619	1.0053	0.999707	0.952654	0.960393	0.0150094	14
57	112	0.912269	1.02276	1.09261	0.971159	0.916862	0.989363	0.878643	0.96149	0.897076	0.919911	0.857352	1.04025	1.0113	0.954616	0.958976	0.0179224	14
58	114	0.924399	1.01905	1.14697	0.968389	0.910845	0.987324	0.907563	0.961863	0.914061	0.919925	0.858316	1.00067	0.991119	0.944946	0.961103	0.0185441	14
59	116	0.945687	0.947705	1.06115	0.990418	0.945397	1.00758	0.901467	0.947567	0.935574	0.929689	0.871139	1.02351	0.978182	0.968415	0.960962	0.0131355	14
60	118	1.01254	0.973608	1.09062	0.968258	0.952011	0.9878	0.912914	0.95518	0.925232	0.916437	0.859485	1.00655	0.997897	0.966895	0.966102	0.0147303	14
61	120	0.946522	1.00701	1.00082	0.970021	1.00281	0.98963	0.916243	0.97054	0.996562	0.928667	0.917796	1.01669	1.012	0.977469	0.975198	0.00937102	14
62	122	0.890822	0.975066	1.05327	0.973048	1.02375	0.998046	0.92738	0.98461	0.944729	0.917189	0.885535	1.02594	1.02584	0.993095	0.972737	0.0140997	14
63	124	0.854712	0.93364	1.07254	1.01665	1.02194	0.983994	0.917776	0.96862	0.941905	0.917621	0.886462	1.02773	1.01666	0.981562	0.967272	0.0164043	14
64	126	1.07892	1.01702	1.06904	0.967532	1.01617	0.976613	0.944242	0.970807	0.992175	0.953165	0.868552	1.04116	1.02818	0.984781	0.993453	0.0145935	14
65	128	0.951004	0.99883	1.08536	0.974674	0.957718	0.982029	0.930509	0.977309	1.00496	0.947402	0.914768	1.01454	1.01252	0.977321	0.980639	0.0113572	14
66	130	1.00556	1.01892	1.07513	0.988418	0.98962	0.990219	0.936246	0.986225	1.01856	0.936491	0.898329	1.01895	1.02135	1.00775	0.992269	0.0118086	14
67	132	0.970414	1.05487	1.10672	0.970813	0.999545	0.974665	0.940665	0.980707	0.931527	0.944848	0.926079	1.05333	1.00999	0.966018	0.987871	0.0140441	14
68	134	0.92154	0.980309	1.1166	0.97824	1.03684	0.960139	0.932225	0.99814	0.996664	0.919231	0.901341	1.00061	1.01884	1.00692	0.983403	0.0150041	14
69	136	0.962421	1.04842	1.11554	0.977605	1.04448	0.971528	0.927392	0.966998	0.967396	0.948936	0.912955	1.04706	1.01231	0.992546	0.992542	0.0147597	14
70	138	1.00829	1.03271	1.14931	1.00244	0.984788	0.987022	0.923554	1.00837	1.00729	0.904607	0.885548	1.0215	1.04162	0.979659	0.995479	0.0172771	14
71	140	0.955632	1.06573	1.01191	0.997019	0.995901	1.00793	0.948969	0.996567	1.03706	0.922381	0.872509	1.00474	1.03204	0.964996	0.98667	0.0133783	14
72	142	1.00365	1.0529	1.10879	0.981343	1.01987	0.978376	0.939958	0.980615	1.01187	0.906208	0.907525	1.02855	1.03405	0.978366	0.995148	0.0147209	14
73	144	1.01715	1.06123	1.09382	0.953991	1.067	0.977211	0.930997	0.978601	0.974928	0.948097	0.886482	1.00341	1.02262	1.00392	0.994247	0.0150957	14
74	146	0.973666	1.06258	1.00322	0.981333	1.02646	1.00201	0.927606	0.988224	1.04701	0.938293	0.872168	1.04856	1.01372	0.991577	0.991174	0.0138553	14
75	148	1.08839	1.0448	1.08858	0.955079	0.999716	0.986397	0.899889	0.988575	1.01631	0.919769	0.910755	1.02507	1.04326	1.00457	0.99794	0.0160959	14
76	150	0.895536	1.03676	1.12584	1.00343	1.05325	1.00502	0.920551	1.00554	0.986552	0.918552	0.894848	1.00993	1.03608	1.00418	0.992576	0.0175147	14
77	152	0.926412	1.07574	1.25713	0.975677	0.999767	0.988445	0.927413	0.996202	1.0235	0.919576	0.908136	1.04383	1.04067	1.01931	1.00727	0.0236668	14
78	154	0.947938	1.05961	1.13257	0.972181	1.01057	0.973737	0.93147	1.03057	1.03171	0.92902	0.952973	1.03855	1.04244	1.00086	1.00387	0.0152594	14
79	156	0.923023	1.0765	1.20718	0.961779	1.02236	0.98519	0.931746	1.03986	1.05894	0.945839	0.912001	1.03522	1.00775	1.03109	1.00989	0.0207255	14
80	158	0.927536	1.03436	1.12137	0.975622	1.04441	0.968474	0.93811	1.01425	1.04479	0.927742	0.893851	1.01743	1.05813	1.02532	0.999385	0.0168329	14
81	160	0.940454	0.977825	1.05474	0.981075	1.03383	0.979127	0.937199	1.02655	1.04563	0.93485	0.925351	1.03389	1.02792	0.997362	0.992557	0.0121074	14
82	162	0.970221	0.982421	1.10792	0.990818	1.01025	0.974096	0.916166	1.03811	1.0617	0.935803	0.904864	1.01168	1.04348	1.0165	0.99743	0.0150764	14
83	164	0.968795	1.06228	1.02631	0.982916	0.997377	0.977474	0.94297	1.02743	1.05935	0.918043	0.889086	1.02984	1.01563	0.997456	0.992498	0.0135165	14
84	166	0.896605	1.06061	1.16051	0.963909	1.05378	0.970627	0.948006	1.06356	1.04706	0.937058	0.911515	1.02461	1.05253	1.00936	1.00712	0.0194252	14
85	168	0.867397	1.01345	1.08718	0.989273	1.02587	0.996046	0.9289	1.01678	1.08462	0.95245	0.8784	1.03666	1.05051	1.00538	0.995209	0.0180525	14
86	170	0.932729	1.02448	1.1019	0.994768	1.02291	1.01396	0.943019	1.03598	1.06254	0.929397	0.910756	1.03167	1.0486	1.01241	1.00465	0.0149857	14
87	172	0.898723	1.00471	1.12656	0.99147	0.927648	0.984229	0.94163	1.04812	1.05167	0.938118	0.931941	1.01747	1.01425	1.06591	0.995889	0.0171167	14
88	174	0.866355	1.0182	1.1399	0.977456	0.945776	0.997796	0.935123	1.04328	1.1174	0.935042	0.884465	1.01301	1.03927	0.985299	0.992741	0.0209446	14
89	176	0.957005	1.03665	1.10661	0.980035	0.980728	0.988799	0.95798	1.03843	1.08129	0.936401	0.898454	1.00061	1.03244	1.00843	1.00028	0.0149691	14
90	178	0.960439	1.01469	1.14867	0.967814	0.997973	0.998098	0.945821	1.02831	1.09857	0.964067	0.886974	1.07705	1.01182	0.981142	1.00582	0.0179138	14
91	180	0.931146	1.08001	1.20077	0.983383	0.995128	0.974094	0.953134	1.02126	1.06147	0.937183	0.896665	1.03236	1.04739	1.03	1.01029	0.02046	14
92	182	1.05094	1.06158	1.18812	0.970629	0.962153	0.989742	0.957641	1.00929	1.05909	0.931546	0.875098	1.03519	1.02349	1.02636	1.01006	0.0197376	14
93	184	1.00072	0.977982	1.03839	0.947116	1.03883	0.982953	0.943631	1.01397	1.11577	0.938791	0.891425	0.984719	1.02498	1.00841	0.993406	0.0146729	14
94	186	0.997321	1.05166	1.0422	0.995532	1.02467	1.00666	0.946015	1.03273	1.09257	0.959712	0.87878	1.02362	1.06251	1.00518	1.00851	0.0143502	14
95	188	0.991481	0.990668	1.23403	0.965977	0.987706	1.00607	0.960808	1.04465	1.08584	1.01015	0.857236	1.00307	1.03569	0.996154	1.01211	0.0218517	14
96	190	0.941027	0.987424	1.10096	0.971125	1.0003	1.01062	0.952478	1.01738	1.07959	0.95196	0.935085	1.04511	1.05174	1.00902	1.00384	0.0138236	14
97	192	0.909689	0.996681	1.16044	0.977656	0.998018	0.978155	0.962843	1.04649	1.08776	0.968402	0.889728	1.0217	1.00985	1.03462	1.003	0.0182973	14
98	194	1.00233	1.1154	0.998248	0.977154	0.995771	1.00148	0.975788	1.01108	1.18439	0.927272	0.869476	1.0263	1.04488	1.00255	1.00944	0.0199405	14
99	196	0.926279	0.988109	1.03298	0.984437	1.01083	0.999394	0.958132	1.03569	1.13767	0.923394	0.901612	1.02605	1.04734	0.984395	0.99688	0.0161686	14
100	198	0.941226	1.09595	1.10544	0.951647	1.00494	0.988369	0.94894	1.0794	1.12323	0.949459	0.863868	1.02906	1.02911	1.00947	1.00858	0.0199191	14
101	200	0.955083	1.07445	1.21111	0.974133	1.01629	0.978518	0.957076	1.03541	1.14985	0.958904	0.89498	1.0379	1.02821	1.03186	1.0217	0.0220454	14
102	202	0.935388	1.03968	1.18109	0.968239	0.97932	1.0223	0.966078	1.0606	1.16475	0.918151	0.886945	0.983133	1.04216	1.02055	1.01203	0.0225299	14
103	204	0.97448	1.04168	1.1342	0.991193	1.00161	0.994064	0.985467	1.04143	1.20072	0.965705	0.874136	1.05126	1.01642	1.03816	1.02218	0.0205974	14
104	206	1.0193	0.969678	1.07442	1.01018	0.98018	0.999339	0.964728	1.058	1.19379	0.943595	0.89491	1.03336	1.06557	0.986065	1.01379	0.0191378	14
105	208	0.93902	1.04941	1.02953	0.986375	1.00495	0.988205	0.960295	1.04244	1.16004	0.909166	0.867702	1.04029	1.02803	1.02123	1.00191	0.0188887	14
106	210	1.02815	1.07262	1.09818	0.984607	1.04102	1.01106	0.9533	1.03215	1.16054	0.943087	0.854988	1.00388	1.04311	1.03801	1.01891	0.0195156	14
107	212	0.895132	0.994031	1.24505	0.957925	1.04167	0.996741	0.952575	1.03769	1.20775	0.938884	0.850769	1.05157	1.02802	1.03663	1.01675	0.0285449	14
108	214	0.954149	1.06204	1.1618	0.956553	0.988873	0.987392	0.967399	1.04746	1.17444	0.93041	0.869543	1.05333	1.02662	1.0217	1.01441	0.0223635	14
109	216	0.917371	1.09161	1.07792	0.985019	1.04556	1.00532	0.986655	1.04035	1.21629	0.953547	0.859277	1.0223	1.03046	1.02698	1.01847	0.0224271	14
110	218	1.03561	1.03993	1.14528	0.987181	1.00884	1.00205	0.97093	1.02446	1.18375	0.938035	0.857947	1.01168	1.0211	1.02402	1.01792	0.0209795	14
111	220	0.856699	0.989142	1.08542	1.00376	1.01816	0.997633	0.936989	1.07868	1.19013	0.969786	0.861522	1.02933	1.01804	1.01558	1.00363	0.02296	14
112	222	1.00886	1.0221	1.15581	0.985171	0.988095	1.02779	0.950818	1.01458	1.14633	0.974765	0.908542	1.02663	1.04095	1.01702	1.0191	0.0176333	14
113	224	0.876994	1.04157	1.13634	0.971192	1.03431	1.01536	0.942534	1.0394	1.14331	0.945257	0.87116	1.01818	1.00641	1.01381	1.00399	0.0213577	14
114	226	1.07662	0.988549	1.17063	0.991068	1.03625	1.02484	0.951279	1.04663	1.22611	0.948014	0.928016	0.98538	1.03174	1.01199	1.02979	0.0221906	14
115	228	0.915768	1.00904	1.12203	0.98499	0.981202	1.00482	0.956364	1.01576	1.22293	0.981202	0.868085	1.04109	1.02806	1.03764	1.01207	0.0227415	14
116	230	0.910879	1.0547	1.18886	0.985477	0.997435	1.02238	0.950324	1.05033	1.18986	0.943556	0.863908	1.00493	1.04599	1.02008	1.01634	0.0244589	14
117	232	0.992644	1.01888	1.20508	0.948165	0.959781	1.00047	0.938475	1.03243	1.21439	0.942159	0.882667	1.03343	1.04074	1.02187	1.01651	0.0250412	14
118	234	0.897282	0.990259	1.11527	0.981272	1.01818	0.992531	0.943189	1.03633	1.18115	0.939759	0.842566	1.01196	1.07646	1.0253	1.00368	0.0230728	14
119	236	0.962986	1.01856	1.16757	0.965208	1.02667	1.00096	0.952664	1.05715	1.20963	0.931314	0.83036	1.03241	1.07095	0.984309	1.01505	0.0254433	14
120	238	0.826175	1.05317	1.17975	0.973675	1.04318	1.01869	0.92691	1.05641	1.21454	0.951246	0.82551	1.01795	1.06155	1.03717	1.01328	0.0295252	14
121	240	0.946074	0.976445	1.15432	0.971427	1.01776	1.02719	0.93143	1.03428	1.22544	0.956387	0.842946	0.992545	1.05959	1.06466	1.01432	0.0253905	14
122	242	0.9121	0.996613	1.17017	0.966994	1.00852	0.999522	0.922087	1.0704	1.20155	0.959699	0.854078	1.02294	1.03095	1.04475	1.01145	0.0250353	14
123	244	0.890028	0.956807	1.07791	0.944772	1.03559	1.0085	0.92492	1.0114	1.14469	0.933311	0.901008	1.06278	1.03022	1.05141	0.998096	0.0200018	14
124	246	0.911637	0.979102	1.13133	0.958145	1.04025	1.02711	0.95684	1.05688	1.1871	0.948466	0.828455	0.993842	1.05214	1.03739	1.00776	0.0240306	14
125	248	1.00902	0.949154	1.15602	0.976591	1.05797	1.00011	0.934382	1.00875	1.24937	0.948232	0.825581	1.03522	1.05757	1.07023	1.01987	0.0271893	14
126	250	0.890404	1.07363	1.13288	0.954438	1.01653	1.00699	0.949876	1.02124	1.20368	0.944533	0.849568	1.02523	1.04916	1.0422	1.01146	0.0246562	14
127	252	0.971207	1.02102	1.11009	0.968429	1.03866	1.01987	0.94916	1.02762	1.17627	0.90627	0.876475	1.01845	1.03013	1.0054	1.0085	0.0203004	14
128	254	0.852069	1.03276	1.11575	0.973918	1.06089	1.00763	0.93174	1.03042	1.19011	0.96349	0.889217	0.992813	1.05176	1.00128	1.0067	0.0232331	14
129	256	0.959985	1.07459	1.04148	0.97144	1.0241	0.989817	0.937042	1.01587	1.17745	0.937749	0.883008	1.02782	1.03792	1.02067	1.00707	0.0189839	14
130	258	0.915952	1.02096	1.22546	0.97486	1.01856	1.00223	0.906931	1.03141	1.14504	0.951875	0.85478	1.01604	1.03656	1.03283	1.00954	0.0251161	14
131	260	0.973254	1.02702	1.16687	0.941067	1.02338	1.01883	0.919933	0.998618	1.14688	0.974407	0.839949	1.03316	1.01828	1.0425	1.00887	0.0222452	14
132	262	0.883685	1.02317	1.24194	0.948839	0.996143	1.00872	0.925572	1.04278	1.14712	0.97334	0.866101	1.02243	1.02832	1.0144	1.00875	0.0260392	14
133	264	0.93602	1.00198	1.20466	0.920574	1.04598	1.03124	0.924341	1.0027	1.16828	0.954194	0.861587	1.03003	1.03812	1.01235	1.00943	0.0248013	14
134	266	0.889019	1.0094	1.15227	0.989829	1.01362	1.00892	0.925182	0.97722	1.20012	0.980044	0.842626	1.02825	1.01628	1.0278	1.00433	0.0244572	14
135	268	1.07737	1.03035	1.2684	0.964594	1.03556	0.995112	0.913039	1.03601	1.1677	0.979293	0.865442	1.02121	1.04242	1.04899	1.03182	0.0264657	14
136	270	0.843409	1.04247	1.12293	1.00004	1.02454	1.02747	0.934863	1.05492	1.17762	0.971992	0.890898	0.996772	1.01771	1.04367	1.01066	0.022838	14
137	272	0.893578	1.06672	1.13988	0.955904	1.0439	1.01586	0.954856	1.03367	1.17819	0.931913	0.855398	1.02792	1.02414	1.04001	1.01157	0.0235605	14
138	274	1.05121	1.10945	1.18571	0.947545	0.989373	1.00943	0.94833	1.04635	1.14488	0.923186	0.848075	1.044	1.05032	1.06563	1.02596	0.0241528	14
139	276	1.03134	0.948392	1.11365	0.964812	0.980431	1.02462	0.95016	1.02723	1.13563	0.937443	0.850505	1.00792	1.0269	1.02078	1.00142	0.01931	14
140	278	0.852696	1.04027	1.15465	0.990397	1.00808	1.01071	0.936943	1.03807	1.21229	0.930178	0.897925	0.994057	1.02608	1.03632	1.00919	0.0250438	14
141	280	0.832917	1.06794	1.12334	0.949118	1.00455	0.998276	0.950141	1.0238	1.19581	0.93658	0.821809	1.01736	1.05895	1.01619	0.999769	0.0268862	14
142	282	0.855746	0.971875	1.15727	0.970555	1.00929	1.01822	0.958678	1.03308	1.19949	0.916469	0.901854	1.00875	1.03659	1.0153	1.0038	0.024391	14
143	284	1.04294	0.998205	1.21295	0.982933	0.975917	0.998174	0.9606	1.02445	1.17262	0.95675	0.843853	0.968309	1.04406	1.04458	1.01617	0.0243083	14
144	286	1.00229	1.03442	1.10192	0.960868	1.07759	1.01507	0.947568	1.00838	1.24188	0.941718	0.794452	1.01187	1.0175	1.03892	1.01389	0.0262688	14
145	288	0.809033	0.996252	1.14266	0.995816	1.08746	1.02114	0.957304	1.04163	1.2133	0.93387	0.875919	1.04219	1.03462	1.0317	1.01306	0.027272	14
146	290	1.00317	1.03759	1.1833	0.973035	0.99096	1.01036	0.954093	1.03894	1.17037	0.928367	0.894952	1.01399	1.02201	1.03473	1.01828	0.0212213	14
147	292	1.00026	1.03385	1.12931	0.997705	1.05517	1.03457	0.956468	1.03055	1.23192	0.981057	0.871112	1.02911	1.02412	1.02389	1.02851	0.0217782	14
148	294	0.98006	1.02964	1.19632	0.972928	1.01674	1.01189	0.936561	1.02391	1.1875	0.92744	0.871371	1.03372	1.05162	1.02485	1.0189	0.0236683	14
149	296	0.979056	1.05789	1.17648	0.937308	1.06224	1.00511	0.947552	1.02477	1.16727	0.94889	0.882023	1.02643	1.02009	1.06255	1.02126	0.0221544	14
150	298	0.967264	1.04832	1.18579	0.963491	1.10288	0.992407	0.941865	0.968173	1.22331	0.95004	0.859077	1.00796	1.03176	1.08445	1.02334	0.0264251	14
151	300	1.0485	1.13501	1.00878	0.946472	1.03445	1.00832	0.943862	0.999822	1.20431	0.937931	0.884252	1.00163	1.02751	1.06474	1.01754	0.0219347	14
152	302	0.874001	1.0748	1.19386	1.00281	1.05514	1.00127	0.945272	1.00165	1.18489	0.948869	0.856611	1.05351	1.0324	1.05757	1.02019	0.0261002	14
153	304	0.96094	0.983959	1.0694	0.971618	1.0661	1.01587	0.945657	1.01066	1.14524	0.968529	0.867757	1.01339	1.07024	1.0394	1.0092	0.018179	14
154	306	1.03872	1.01592	1.15912	0.976355	1.01062	1.0212	0.959879	1.01297	1.25509	0.947134	0.849494	1.01761	1.03158	1.04237	1.02415	0.0251837	14
155	308	0.874996	1.04224	1.20349	0.985349	0.96417	1.004	0.95473	0.992596	1.20465	0.962934	0.855545	1.06153	1.03536	1.0363	1.01271	0.0267931	14
156	310	0.963537	1.03023	1.16734	0.95006	1.03221	1.01195	0.943287	1.004	1.22526	0.907653	0.878448	1.03656	1.01205	1.04392	1.01475	0.0247584	14
157	312	1.06927	1.07764	1.19246	0.966808	1.01433	1.02762	0.949858	1.0136	1.14093	0.95639	0.846131	1.03043	1.03307	1.03701	1.0254	0.0225364	14
158	314	1.00803	0.969681	1.12255	0.94742	1.05309	1.02575	0.94724	0.984862	1.18401	0.971509	0.879279	1.04763	1.02781	1.06272	1.01654	0.0206557	14
159	316	0.903696	0.99024	1.18747	0.976004	1.00689	0.99736	0.932468	0.986766	1.24736	0.939719	0.87136	1.02849	1.00293	1.05693	1.00912	0.0271491	14
160	318	0.868503	0.971474	1.10582	0.930002	1.04977	1.03903	0.935335	0.989473	1.19223	0.947141	0.857656	1.00273	1.04299	1.07038	1.00018	0.0245076	14
161	320	1.0098	1.02792	1.22777	0.94933	1.04676	0.997903	0.930239	1.02853	1.23845	0.940387	0.870159	1.03409	1.00375	1.06969	1.02677	0.0273826	14
162	322	0.993958	0.954271	1.26294	0.978204	1.03112	1.02664	0.951734	0.981003	1.20552	0.943798	0.840005	1.03272	1.0334	1.06351	1.02134	0.0284147	14
163	324	1.03498	0.993232	1.24251	0.967159	1.03843	1.00454	0.934761	1.00816	1.29699	0.934379	0.849652	1.0279	1.01093	1.05392	1.02839	0.030974	14
164	326	0.82128	1.01564	1.14419	0.959472	1.03631	1.04143	0.923768	0.995423	1.24094	0.958384	0.87097	1.02653	1.04206	1.09341	1.01213	0.0286182	14
165	328	1.04044	0.966654	1.11078	0.938868	1.0455	1.00355	0.927466	1.00193	1.2094	0.961428	0.87643	1.02632	1.04683	1.07439	1.01643	0.0224037	14
166	330	0.890802	1.01484	1.12144	0.963634	1.00642	1.01308	0.926019	1.00833	1.24434	0.963389	0.881439	0.978044	1.01185	1.07972	1.00738	0.0251682	14
167	332	0.958626	0.978148	1.24401	0.946464	1.035	1.00941	0.937516	1.01439	1.33572	0.971107	0.860105	1.05391	1.03395	1.06255	1.03149	0.0329186	14
168	334	0.991048	1.09065	1.15987	0.970254	1.09627	1.02889	0.951992	1.03812	1.28269	0.974147	0.860776	1.01849	1.0571	1.08455	1.0432	0.0270518	14
169	336	0.934824	1.08226	1.22558	0.9534	1.05942	1.03916	0.935314	0.989685	1.29309	0.955478	0.9034	1.04604	1.02754	1.09629	1.03868	0.0298208	14
170	338	0.956969	1.07098	1.17074	0.959986	1.08713	1.0152	0.94342	0.988144	1.30755	0.952295	0.849035	1.01758	0.995451	1.06416	1.02705	0.0298961	14
171	340	0.983703	1.03409	1.30781	0.942355	1.03093	1.01719	0.947989	1.01783	1.25302	0.936818	0.866866	0.993937	1.00871	1.04343	1.02748	0.0315305	14
172	342	0.94235	1.00537	1.22001	0.913573	1.08604	1.02115	0.934397	0.974649	1.29352	0.96501	0.872953	1.03184	1.02447	1.03574	1.02293	0.0306586	14
173	344	0.986151	1.08213	1.20337	0.96217	1.03447	1.02188	0.937728	1.01033	1.25689	0.965287	0.848456	1.06734	1.03762	1.01033	1.0303	0.0276107	14
174	346	1.02828	1.02514	1.05987	0.949369	1.0713	1.02385	0.928505	0.963152	1.25786	0.946919	0.865904	0.992648	0.99571	1.04358	1.01086	0.0242823	14
175	348	0.910588	1.06964	1.01315	0.975969	1.03161	1.03008	0.948159	1.01435	1.26048	1.00005	0.870667	1.0114	1.04861	1.03157	1.01545	0.0238029	14
176	350	0.873229	0.978702	1.18131	0.971146	1.04604	1.01432	0.947911	1.03098	1.34361	0.95148	0.861045	1.02006	1.04314	1.05189	1.02249	0.0326349	14
177	352	1.04691	1.0256	1.30188	0.982134	1.02618	1.04442	0.943372	1.00221	1.27531	0.971716	0.871114	1.04197	1.05699	1.05617	1.04614	0.0307187	14
178	354	0.919587	1.05735	1.16962	0.969725	1.09083	1.01017	0.950289	0.99311	1.36234	0.941308	0.859862	1.01682	1.03126	1.0381	1.02931	0.0327638	14
179	356	0.973031	1.06417	1.1634	0.985012	0.982115	1.00002	0.93364	0.993863	1.29002	0.973938	0.851383	0.989148	1.05037	1.07603	1.0233	0.0281525	14
180	358	0.896795	1.00972	1.14917	0.952101	1.00536	1.01728	0.940342	1.02414	1.36952	0.959098	0.869791	0.994834	1.0547	1.0385	1.0201	0.0326302	14
181	360	0.940997	1.02907	1.17602	0.959514	1.09617	1.00439	0.933019	1.00449	1.37268	0.967206	0.891609	1.01819	1.03984	1.04709	1.03431	0.0323184	14
182	362	1.01326	1.04916	1.18726	0.951193	1.04941	1.02226	0.921829	1.00024	1.37817	0.935148	0.881576	1.01759	1.0209	1.04605	1.03386	0.0329121	14
183	364	0.910693	0.96614	1.05804	0.934621	1.06308	1.00557	0.953757	0.969535	1.44491	0.967178	0.871848	1.00039	1.05048	1.04343	1.01712	0.0362846	14
184	366	0.991368	1.06298	1.20547	0.935779	1.03672	1.00836	0.939762	0.997233	1.40495	0.940364	0.844816	1.02376	1.01658	1.03265	1.03149	0.0359404	14
185	368	0.878371	0.995856	1.1569	0.955704	1.06961	1.01367	0.912069	0.995876	1.3915	0.928586	0.833673	1.03107	1.03287	1.05146	1.01766	0.036354	14
186	370	0.80019	0.999095	1.14861	0.972107	1.05357	1.02165	0.933949	0.972784	1.37795	0.964421	0.886707	1.01353	1.01103	1.06346	1.01565	0.0354778	14
187	372	0.991368	1.04916	1.05804	0.947511	1.00506	1.02105	0.941791	0.991155	1.31848	0.93187	0.860253	0.99387	1.03056	1.08121	1.01581	0.0279538	14

## Sheet: Magnets1x Wt 37C
Depletion of cytosolic pool of prey
Magnets 1x Wt 37C
	Time (s)	Cell1	Cell2	Cell3	Cell4	Cell5	Cell6	Cell7	Cell8	Cell9	Cell10	Cell11	Cell12	Cell13	Average	ES	N
1	0	1	1	1	1	1	1	1	1	1	1	1	1	1	1	0	13
2	2	1.01057	1.02649	0.962765	0.97861	1.02314	1.01828	1.0437	0.985987	1.05279	1.02913	0.996467	0.985714	1.01167	1.00964	0.00734389	13
3	4	1.01271	1.02451	0.983977	1.01314	1.01896	1.01438	1.00348	1.00866	1.01054	1.04382	1.03117	1.00365	1.02095	1.01461	0.00402293	13
4	6	0.960766	1.00749	0.989174	0.94625	1.01005	0.998343	1.00104	1.00713	1.07349	1.03073	1.03348	0.978991	1.02271	1.00459	0.00909574	13
5	8	1.0426	1.03287	0.979611	0.990456	1.06436	0.999687	0.986563	0.962598	1.03335	1.05104	1.03057	0.968265	1.0346	1.01358	0.00933081	13
6	10	0.963804	1.00387	0.957369	1.03921	1.03235	1.02943	1.00123	0.993699	1.04889	1.00102	1.03083	0.963059	1.0725	1.01056	0.00985412	13
7	12	1.04184	1.04839	1.00345	1.01433	1.0005	1.00689	1.00703	0.944509	1.06361	1.0584	1.05888	0.98682	1.09088	1.02504	0.010946	13
8	14	1.0338	1.02899	0.986783	1.05728	0.985432	1.01436	0.977252	0.94211	1.07362	1.06364	1.08858	0.998172	1.07294	1.02484	0.0124914	13
9	16	0.965194	1.0251	0.999017	1.05737	1.00097	1.04828	1.04783	0.947283	1.06468	1.04308	1.05319	0.988058	1.06668	1.02359	0.010964	13
10	18	0.993696	1.08257	0.980728	1.04731	0.988218	1.02738	1.02672	0.96608	1.03579	1.0863	1.06631	0.956836	1.03424	1.02247	0.011825	13
11	20	1.02151	1.0428	1.01252	1.03306	1.00774	1.01112	1.02931	1.01436	1.06339	1.05434	1.04998	0.970105	1.07772	1.02984	0.00785224	13
12	22	0.956926	1.07165	0.999119	1.01242	1.00956	1.0231	1.04233	1.0218	1.07311	1.06236	1.04808	0.974089	1.0802	1.02883	0.0107067	13
13	24	0.971527	1.05497	0.987249	1.0181	0.989597	1.00321	0.989689	0.984529	1.0565	1.0949	1.03428	0.979671	1.0866	1.01929	0.0116665	13
14	26	0.933855	1.06999	1.04662	1.03042	1.00995	1.01948	1.03149	0.975841	1.10109	1.06644	1.02807	0.954691	1.07458	1.02635	0.0135019	13
15	28	0.980792	1.06706	1.01133	1.07802	0.996153	1.02084	1.05791	0.983758	1.10342	1.02654	1.03815	0.983403	1.07102	1.03219	0.0112823	13
16	30	0.976869	1.08419	0.985956	1.04165	1.00904	1.0262	1.0739	0.931537	1.0461	1.0183	1.02667	0.956856	1.1009	1.0214	0.0138055	13
17	32	0.976573	1.06048	0.994322	1.01308	0.970459	1.00887	1.02951	0.976525	1.02694	1.05413	1.03411	0.964038	1.08312	1.01478	0.010428	13
18	34	0.959332	1.06889	0.963578	1.03823	0.994011	1.03364	0.991063	1.03601	1.01377	1.1347	1.06067	0.943391	1.09283	1.02539	0.0154394	13
19	36	0.970929	1.04412	1.0044	1.0058	0.975689	1.02422	1.00442	1.00749	1.06514	1.05245	1.04749	0.954785	1.05549	1.01634	0.00980576	13
20	38	0.975221	1.04037	0.975788	1.00988	0.972501	1.01625	0.982584	0.992978	1.02419	1.12443	1.03412	0.975034	1.05603	1.0138	0.0120944	13
21	40	0.989294	1.04677	1.04107	1.04991	0.975446	1.03135	1.02101	0.998745	1.03434	1.11379	1.07101	0.986518	1.11836	1.03674	0.0124866	13
22	42	0.989321	1.03631	0.985167	1.08036	1.00565	1.00841	1.00071	0.987384	1.01663	1.08559	1.049	0.918633	1.06811	1.01779	0.0127904	13
23	44	0.972935	1.07684	0.986824	1.03566	1.00452	1.01519	1.00524	0.994202	1.03601	1.05214	1.03997	0.945473	1.0975	1.02019	0.0116535	13
24	46	0.998048	1.06319	1.00711	1.03711	1.0153	1.01643	1.06642	1.00049	1.028	1.06611	1.0661	0.953131	1.06085	1.0291	0.00972556	13
25	48	1.00834	1.07781	0.97319	1.05476	1.0042	1.02117	1.04571	0.968451	1.01839	1.07602	1.08901	0.966422	1.08589	1.02995	0.0124742	13
26	50	0.983314	1.03626	0.984145	1.0222	0.986834	1.01078	1.00649	1.00515	1.0658	1.00414	1.04764	0.938226	1.12112	1.01632	0.0124902	13
27	52	0.96634	1.06881	0.982326	1.01171	1.00728	1.02864	1.01715	0.998333	1.11602	1.09285	1.02364	0.934465	1.083	1.02543	0.0145237	13
28	54	0.98248	1.06625	0.977767	0.999949	0.975456	1.0184	1.00296	1.01983	1.06775	1.05233	1.0262	0.949013	1.10005	1.01834	0.0120851	13
29	56	0.995578	1.07665	0.943352	1.02403	0.974545	1.04544	1.03227	0.996604	1.10521	1.09229	1.03599	0.974362	1.10634	1.03097	0.0147245	13
30	58	0.966519	1.07339	0.962844	0.998139	0.976758	1.025	1.02237	1.00004	1.03168	1.06651	1.05286	0.9748	1.09948	1.01926	0.01227	13
31	60	0.994591	1.0617	0.998379	1.05416	0.961159	1.03172	1.03555	1.07506	1.04489	1.08627	1.0604	0.964042	1.10253	1.03619	0.0124219	13
32	62	0.958932	1.08208	0.995111	1.05615	0.983388	0.990325	1.00222	0.978579	1.08259	1.05823	1.05012	0.917615	1.08922	1.01881	0.0150434	13
33	64	0.972143	1.02783	1.01329	1.026	0.973645	1.00481	1.01011	1.01952	1.0723	1.05918	1.05787	0.962563	1.0926	1.02245	0.0110671	13
34	66	0.985388	1.06015	0.98578	1.03455	0.973385	1.03255	1.00545	0.993575	1.05728	1.00514	1.06265	0.96227	1.09851	1.01974	0.0114236	13
35	68	0.968243	1.08911	0.919141	1.02679	0.972193	1.02423	1.01758	0.973204	1.04774	1.08111	1.0649	0.936595	1.0827	1.01566	0.0158789	13
36	70	0.997939	1.07924	1.02199	1.04193	0.978355	1.01643	0.972604	0.965813	1.02331	1.05052	1.06514	0.958867	1.07448	1.01897	0.0116251	13
37	72	0.990069	1.06308	0.940093	1.04623	1.01827	1.0172	0.922047	1.01418	1.00226	1.059	1.06372	0.926892	1.11422	1.01364	0.016059	13
38	74	0.985608	1.10379	1.01562	1.00253	0.97821	1.02501	0.969796	1.01528	0.990799	1.06336	1.06155	0.937184	1.09197	1.01852	0.0137074	13
39	76	0.942655	1.07529	0.972913	1.0354	0.983157	1.00022	0.970266	0.975007	1.02429	1.0873	1.05667	0.929405	1.0966	1.01148	0.0153513	13
40	78	1.01102	1.07119	0.93425	1.03625	1.00895	0.999704	0.953278	0.976701	1.01339	1.05398	1.04754	0.961435	1.10912	1.0136	0.0138621	13
41	80	0.984455	1.08694	1.00397	1.03162	0.939889	0.997299	0.940994	0.957047	1.0156	1.06163	1.0503	0.923484	1.10916	1.00788	0.0162708	13
42	82	0.958038	1.08977	0.995335	1.03982	0.99418	1.02884	0.983417	0.981943	1.0193	1.03533	1.04882	0.936288	1.08731	1.01526	0.0127983	13
43	84	0.979002	1.11362	0.940399	1.021	0.961109	0.989068	0.980854	1.02036	1.08968	1.07969	1.05412	0.946295	1.11013	1.02195	0.0171397	13
44	86	0.95708	1.10082	0.98658	1.04687	0.948058	1.03706	0.99746	0.983807	1.12192	1.08413	1.04407	0.940226	1.09642	1.0265	0.0172368	13
45	88	0.968389	1.04451	0.966968	1.03503	0.963141	1.00618	0.967255	0.956519	1.03445	1.02537	1.05003	0.949576	1.12742	1.0073	0.0143398	13
46	90	1.00413	1.08288	1.01764	1.03167	0.94613	0.994768	0.993744	1.00289	0.975633	1.03456	1.07479	0.94342	1.10376	1.01585	0.0136956	13
47	92	0.989914	1.10646	0.970965	1.02181	0.962745	0.990189	0.999253	0.996511	1.04239	1.07641	1.07646	0.954847	1.111	1.023	0.0150248	13
48	94	0.979229	1.08047	0.975075	1.03107	0.943524	1.03081	1.01621	1.00286	1.01878	1.05583	1.02745	0.936206	1.09521	1.01483	0.0132541	13
49	96	0.970236	1.10368	1.02417	1.03753	0.988233	1.03308	0.97135	0.970399	0.994004	1.06247	1.05074	0.948714	1.11054	1.0204	0.0144365	13
50	98	1.01121	1.09187	1.02086	1.05535	0.970552	1.02412	1.03486	0.996292	0.987295	1.08313	1.0443	0.951569	1.10213	1.02873	0.012865	13
51	100	1.00802	1.11211	0.977622	1.02423	0.96522	1.03058	0.970224	0.968777	1.06774	1.05792	1.06589	0.939691	1.08951	1.02135	0.0151352	13
52	102	1.02523	1.10757	1.00556	1.01078	0.934301	1.01625	0.924665	0.93661	1.05394	1.04714	1.06899	0.913318	1.09573	1.01078	0.0182027	13
53	104	0.971779	1.09634	0.954006	1.01746	0.98465	1.01118	0.950923	0.924563	1.03544	1.03274	1.04532	0.94969	1.12162	1.00736	0.0164001	13
54	106	1.02122	1.0733	1.00531	1.02388	0.980279	1.02216	0.938826	0.947388	1.03799	1.01264	1.06957	0.944737	1.12643	1.01567	0.0152127	13
55	108	0.982794	1.13008	0.950959	1.03837	0.98362	0.995201	0.979005	1.00174	0.969387	1.04895	1.05381	0.946902	1.13202	1.01637	0.016951	13
56	110	0.986085	1.12599	0.983857	1.03002	0.93044	0.994415	0.935749	0.950915	1.02356	1.07314	1.03027	0.951645	1.11104	1.00978	0.0177019	13
57	112	1.01143	1.10601	0.975857	1.03707	0.987724	1.02043	0.932274	1.00885	1.07906	1.03889	1.05542	0.943263	1.10014	1.0228	0.0151659	13
58	114	1.02127	1.08692	0.977052	1.05455	0.972842	1.00119	0.921393	0.978268	1.05165	1.02528	1.07408	0.945252	1.07782	1.01443	0.0147722	13
59	116	0.961385	1.09677	0.948179	1.02206	0.93569	1.02555	0.964092	0.954544	1.094	1.04138	1.04781	0.965326	1.09842	1.01194	0.0168022	13
60	118	0.995629	1.12378	0.982916	1.0491	0.96639	0.996026	0.964795	0.970231	1.07014	1.05395	1.04762	0.946834	1.11966	1.02208	0.0164506	13
61	120	0.979755	1.10045	0.972264	1.03559	0.946907	1.00875	0.944059	1.01773	1.00493	1.01025	1.02112	0.937389	1.10559	1.00652	0.0147562	13
62	122	0.971397	1.10711	0.930974	1.0545	0.955364	0.993737	0.976681	1.0144	1.02448	1.0486	1.07857	0.918419	1.11829	1.01481	0.0178561	13
63	124	1.00044	1.1129	0.950601	1.06988	1.0064	1.00666	0.96668	0.965652	0.970006	1.05231	1.11195	0.930334	1.11692	1.02006	0.0182414	13
64	126	1.02223	1.1177	0.950012	1.0381	0.959449	0.994011	0.925242	0.996776	0.992235	1.04714	1.03311	0.933545	1.08483	1.00726	0.0159896	13
65	128	0.970458	1.11466	0.967461	1.04822	0.970007	1.02821	0.943194	0.940091	1.01111	1.01085	1.04357	0.91205	1.10771	1.0052	0.0173649	13
66	130	1.00901	1.08426	0.953095	1.0166	1.01303	1.00035	0.926034	0.968934	1.03202	0.993535	1.02108	0.934644	1.08238	1.00269	0.0135725	13
67	132	0.992669	1.11059	0.975921	1.01994	0.983628	1.0331	0.929551	0.977059	0.993359	1.06713	1.06042	0.944314	1.08159	1.01302	0.0151636	13
68	134	1.01657	1.15869	0.948073	1.03914	0.960347	1.00102	0.949469	1.0011	1.01196	1.02982	1.04792	0.931786	1.10723	1.01562	0.0179242	13
69	136	1.03204	1.12003	0.970653	1.04599	0.994631	1.00841	0.927426	0.965961	1.08383	1.04035	1.013	0.945214	1.09044	1.0183	0.0161292	13
70	138	0.962039	1.11555	0.940815	1.03634	0.983837	1.02975	0.932205	0.957369	0.990352	1.02769	1.00695	0.916403	1.08763	0.998995	0.016552	13
71	140	0.980189	1.1261	0.976845	1.05118	0.965622	1.02893	0.893397	0.996386	1.04673	1.07167	1.02413	0.946248	1.0956	1.01562	0.0178325	13
72	142	0.974525	1.14619	0.971863	1.02448	0.996081	0.982998	0.94735	0.99377	1.0585	1.07848	1.03213	0.934452	1.13301	1.02106	0.0184947	13
73	144	0.971992	1.09826	0.995274	1.02772	0.953723	0.997255	0.980517	0.958414	1.01816	1.08528	1.01217	0.933064	1.13821	1.01308	0.0169079	13
74	146	0.998189	1.16754	0.999434	1.01242	0.994827	1.01466	0.907619	1.00504	1.07933	1.01658	1.03958	0.923832	1.10766	1.02052	0.0191293	13
75	148	1.00357	1.11175	0.985567	1.00867	0.976125	1.01883	0.954447	0.973557	1.07995	1.00906	1.04806	0.935175	1.10203	1.01591	0.0153151	13
76	150	0.985112	1.14125	0.972144	1.00523	0.949917	0.997272	0.944206	1.01626	0.992343	1.0238	1.03602	0.955175	1.11314	1.01014	0.0164598	13
77	152	0.968744	1.16755	1.00037	1.03699	0.934356	1.01239	0.950986	0.989089	1.03117	1.08161	1.03155	0.950286	1.14095	1.02277	0.0198756	13
78	154	1.0017	1.12742	1.01333	1.03459	0.934256	1.01736	0.965299	0.99359	1.01524	1.07995	1.03014	0.925737	1.10755	1.01894	0.0166863	13
79	156	0.961835	1.16313	1.01184	1.04384	0.972882	1.02309	0.993483	0.993985	0.985275	1.02627	1.01687	0.928943	1.11349	1.01807	0.0172375	13
80	158	0.970867	1.16603	1.00508	1.04568	0.910765	1.02704	0.98014	1.02658	1.00347	1.03607	1.06558	0.936274	1.116	1.02227	0.0191154	13
81	160	0.990798	1.1473	0.967652	1.08342	0.981337	1.00565	0.946041	1.01263	0.966674	1.03496	0.990872	0.942009	1.10189	1.01317	0.017384	13
82	162	0.987965	1.16108	1.00979	1.0695	0.970778	1.02117	0.957543	0.958272	1.10129	1.04575	1.02576	0.965677	1.1201	1.03036	0.0183448	13
83	164	0.963612	1.17761	0.937103	1.04543	0.930448	1.00803	0.996026	0.971691	1.06944	1.03061	1.02038	0.953765	1.11411	1.01679	0.0199804	13
84	166	1.00022	1.15484	0.938486	1.04911	0.966885	1.0024	0.983693	0.971343	0.992509	1.06717	1.01825	0.932995	1.11012	1.01446	0.0181091	13
85	168	0.977223	1.13032	0.966575	0.976151	0.956604	0.984706	0.995599	0.9999	0.994753	1.06956	1.02355	0.929532	1.10525	1.00844	0.0163814	13
86	170	0.994945	1.16361	1.01097	1.04424	0.969196	1.01387	0.990957	0.990667	1.04675	1.05536	1.04634	0.908505	1.08061	1.02431	0.0169399	13
87	172	1.01102	1.1456	0.963748	1.07028	0.926295	1.01659	0.999975	0.925219	1.04554	1.03563	1.05175	0.922038	1.08287	1.01512	0.0187543	13
88	174	1.00592	1.13905	0.98504	1.05276	0.967518	1.02111	0.958138	0.979486	1.05762	1.03239	1.0694	0.923383	1.1122	1.02339	0.0172812	13
89	176	0.961135	1.1582	0.990467	1.03299	0.959008	1.02872	0.970375	0.981218	1.0141	1.01944	1.03836	0.923076	1.10888	1.0143	0.0176527	13
90	178	0.947506	1.1824	1.01063	1.02366	0.963906	0.991459	0.902414	0.944942	1.0133	1.02827	1.02763	0.920597	1.13594	1.00713	0.0221433	13
91	180	0.969448	1.17808	0.993193	1.06217	0.991968	1.02496	0.92603	1.00836	1.02612	1.03834	1.04023	0.926493	1.13187	1.0244	0.0198726	13
92	182	0.97298	1.17551	1.01427	1.04018	0.929785	0.9779	0.945002	0.995203	1.06673	1.01504	1.05922	0.93318	1.12279	1.01906	0.0203849	13
93	184	0.984583	1.16279	0.960697	1.01185	0.980637	1.01356	0.950168	1.03246	1.121	1.04236	1.07828	0.955009	1.10426	1.03059	0.0189149	13
94	186	0.990906	1.11399	0.948291	1.04524	0.97155	0.99994	0.920659	0.944801	1.03169	1.02645	1.03008	0.919977	1.10776	1.00395	0.0176084	13
95	188	0.972281	1.16298	1.00971	1.03649	0.973127	1.01856	0.884861	0.942875	1.00617	1.04172	1.02531	0.964238	1.1	1.01064	0.0193764	13
96	190	0.996462	1.15699	0.983212	1.0648	0.951271	1.01618	0.956383	0.915402	0.997173	1.02292	1.04945	0.959843	1.08392	1.01185	0.0180178	13
97	192	0.976684	1.13528	0.939235	1.06517	1.02101	0.995281	0.969162	0.9274	1.02944	1.04009	1.04188	0.947234	1.11386	1.01552	0.0179592	13
98	194	0.990987	1.12085	0.955894	1.04853	0.980108	1.01828	0.944387	0.963863	0.918336	1.0505	1.0438	0.943795	1.10824	1.00674	0.01782	13
99	196	0.970472	1.13711	0.957012	1.05781	0.971514	1.01445	0.988583	0.982296	1.02581	1.01443	1.02609	0.935371	1.11193	1.01484	0.0163546	13
100	198	0.991212	1.13582	0.959915	1.05176	0.930434	1.01433	0.97537	0.997592	0.979608	0.992407	1.02093	0.947465	1.10226	1.00762	0.016377	13
101	200	0.99245	1.16175	0.970977	1.0416	0.970972	1.01783	0.975331	0.945934	1.01277	1.0151	1.06086	0.936984	1.10947	1.01631	0.0179166	13
102	202	0.980896	1.13904	0.970608	1.06374	0.993647	1.02579	0.921063	0.976466	1.0317	1.0327	1.04953	0.9354	1.08405	1.01574	0.0169195	13
103	204	0.975351	1.16052	0.972737	1.02148	0.969429	1.00855	0.934453	0.942978	0.989376	1.02147	1.02783	0.934461	1.09635	1.00423	0.0180504	13
104	206	0.9799	1.16124	0.971898	1.01966	1.00407	0.995232	0.96143	0.979686	0.99893	1.02666	1.0447	0.902297	1.1107	1.01203	0.0182832	13
105	208	0.935956	1.14137	0.969271	1.01697	0.971199	1.01648	0.876961	0.944622	1.021	1.00109	1.06643	0.950074	1.09203	1.00027	0.0196838	13
106	210	0.911384	1.15374	0.970312	1.0461	0.943098	1.02721	0.931484	0.94003	1.01663	0.98866	1.02461	0.951445	1.10376	1.00065	0.0197574	13
107	212	0.964609	1.12286	1.01847	1.02893	0.950739	1.02667	0.93412	0.979305	0.955214	1.0184	1.02705	0.955372	1.09958	1.00626	0.0159944	13
108	214	0.979779	1.14687	0.970887	1.02502	0.987735	1.03375	0.993632	0.975687	1.02522	1.03597	1.04009	0.92572	1.11718	1.01981	0.0166137	13
109	216	0.950222	1.16102	0.960797	1.04466	0.960428	1.00561	0.961285	1.03455	1.0789	1.01635	1.01727	0.913645	1.12922	1.018	0.0200899	13
110	218	0.975203	1.13437	0.947343	1.01117	0.946214	1.03049	0.953338	1.03634	0.971249	1.03624	1.02586	0.943642	1.11847	1.00999	0.0174697	13
111	220	0.957477	1.17752	0.995942	1.08884	0.925423	1.02774	0.908008	0.931589	1.07122	1.01282	1.02569	0.960619	1.12493	1.01599	0.0227074	13
112	222	0.94577	1.15854	1.02798	1.05218	0.944076	1.03451	0.910039	0.957937	1.05987	1.00753	1.05066	0.933454	1.11419	1.01513	0.0206404	13
113	224	1.00556	1.13062	1.00421	1.04966	0.966556	1.02888	0.996127	0.997806	1.01699	1.02101	1.03901	0.944598	1.11574	1.02437	0.0144444	13
114	226	0.99823	1.15021	0.952443	1.06854	0.969287	1.0207	0.920973	1.00456	0.996224	1.02007	1.06445	0.924854	1.13262	1.01717	0.0197969	13
115	228	0.978229	1.15338	0.98101	1.04214	0.994195	1.04952	0.88325	0.962836	0.917565	1.01376	1.05026	0.914902	1.13282	1.00568	0.0223045	13
116	230	0.962215	1.15017	0.974086	1.01773	0.973883	1.03397	0.961905	0.966416	1.04578	1.01992	1.02708	0.921896	1.12987	1.01423	0.0184221	13
117	232	0.964538	1.15102	1.02629	1.04927	0.97627	1.00996	0.899966	0.964578	0.947704	0.971445	1.04699	0.920189	1.11399	1.00325	0.0202692	13
118	234	0.948085	1.13586	1.00061	1.0693	0.967474	1.04574	1.01534	0.966612	0.992494	1.03175	1.03526	0.919004	1.11405	1.01858	0.0175122	13
119	236	0.96916	1.17816	1.02304	1.07762	0.95352	1.05028	0.941387	0.939223	1.00849	0.984896	1.0214	0.915837	1.12973	1.01483	0.0216141	13
120	238	0.990635	1.12737	0.969879	1.04818	0.981476	1.03527	0.929244	0.938933	1.0669	1.04848	0.982497	0.92223	1.1212	1.01248	0.0188968	13
121	240	0.989573	1.19589	0.984205	1.10777	0.960604	1.02118	0.893108	0.979956	1.02204	1.04007	1.0443	0.950812	1.08019	1.02075	0.0214062	13
122	242	0.988787	1.17322	1.00583	1.04519	0.932895	1.01441	0.941505	0.982035	0.985107	0.995672	0.994867	0.931157	1.09758	1.00679	0.0187066	13
123	244	0.965778	1.13644	0.96855	1.02778	0.994256	1.04605	0.921658	0.946191	0.975589	1.042	0.990476	0.933435	1.1086	1.00437	0.0181096	13
124	246	0.98657	1.11151	0.98271	1.05806	0.96578	1.0297	0.941446	0.903749	0.952666	1.05752	1.07312	0.95264	1.12877	1.0111	0.0194722	13
125	248	0.946347	1.15894	1.00244	1.03847	0.987347	1.01732	0.927391	0.953341	1.02424	1.10817	1.00952	0.927169	1.11695	1.01674	0.0204521	13
126	250	0.94922	1.1482	0.98712	1.07427	0.978593	1.06468	0.90851	0.974322	1.05456	1.05209	1.09314	0.942541	1.10656	1.02568	0.0203097	13
127	252	0.95094	1.1598	0.986032	1.05094	0.968171	1.02811	0.93738	0.99089	1.01973	1.0557	1.00496	0.943474	1.12673	1.01714	0.0188606	13
128	254	0.958304	1.17561	0.980122	1.01929	0.961761	1.05319	0.964413	0.957493	1.02583	1.02914	1.06116	0.936908	1.1267	1.01922	0.019806	13
129	256	0.952418	1.14827	0.920896	1.03353	0.947791	1.0321	0.991407	0.968165	1.01323	1.06026	1.0242	0.938974	1.10904	1.01079	0.0187706	13
130	258	0.976745	1.16007	0.963191	1.06201	0.941672	1.05788	0.980469	0.944526	0.962901	1.06941	1.0301	0.938457	1.09565	1.01408	0.019453	13
131	260	0.930967	1.17222	0.964726	1.06546	0.963736	1.03198	0.951359	0.973472	1.02351	1.02289	1.04749	0.953813	1.10893	1.0162	0.0194938	13
132	262	0.986981	1.18462	0.950583	1.02587	0.963551	1.05157	0.905398	0.963453	0.95684	0.97678	1.00158	0.944721	1.10443	1.00126	0.0208754	13
133	264	0.954178	1.17942	1.017	1.08466	0.963914	1.02819	0.903321	1.02287	0.999021	1.01432	1.03651	0.939073	1.10604	1.01912	0.0204846	13
134	266	0.926072	1.18455	0.95524	1.02893	1.0027	1.02186	0.940728	0.945965	1.04257	1.03242	1.00514	0.923591	1.13525	1.01115	0.0218802	13
135	268	0.963559	1.17944	1.00108	1.07869	1.0315	1.03549	0.933897	0.914613	0.9852	1.04121	1.03421	0.944573	1.12602	1.02073	0.0211962	13
136	270	0.936759	1.16791	1.02357	1.0629	0.972795	1.06616	0.95592	0.938101	0.989853	1.032	1.02124	0.925126	1.12166	1.01646	0.0205778	13
137	272	1.01867	1.19236	0.953233	1.09284	0.98155	1.04381	0.880584	0.929076	1.02066	1.02037	1.03597	0.924218	1.09328	1.01436	0.0231509	13
138	274	0.977279	1.19415	1.01109	1.0611	0.955687	1.02154	0.957226	0.93368	1.00755	1.02733	1.05564	0.9274	1.10739	1.01824	0.0207401	13
139	276	0.981129	1.21771	0.969986	1.06884	0.97658	1.05871	0.921329	0.958494	1.00909	1.05369	1.02802	0.925959	1.11357	1.02178	0.0228238	13
140	278	0.985676	1.17623	1.00317	1.05729	0.928764	1.01945	0.912386	0.980463	0.987536	1.03229	1.02133	0.906633	1.11237	1.00951	0.021166	13
141	280	0.999255	1.19514	1.01337	1.11369	0.942213	1.06639	0.9034	1.00266	0.991806	1.02793	1.04606	0.948302	1.11197	1.02786	0.0221244	13
142	282	0.945798	1.19461	0.974081	1.13973	0.928941	1.04479	0.931519	0.952465	1.04308	1.01701	1.06413	0.944644	1.10026	1.02162	0.0237928	13
143	284	0.970472	1.2177	0.962235	1.0457	0.942682	1.03968	0.94007	0.987198	0.991471	1.01912	1.02253	0.90692	1.1233	1.01301	0.0230676	13
144	286	0.934477	1.18822	0.978228	1.04672	0.958698	1.03852	0.949915	0.967986	0.993675	1.05277	1.02723	0.930934	1.12436	1.01475	0.021194	13
145	288	0.955964	1.21926	0.996056	1.10005	0.942512	1.06546	0.942077	0.95792	0.935767	1.00171	1.02563	0.924497	1.1207	1.01443	0.0246905	13
146	290	0.900813	1.22567	1.01116	1.06142	0.946846	1.02664	0.907232	0.953604	0.991373	1.07341	1.03057	0.946221	1.12845	1.01565	0.0255152	13
147	292	0.931489	1.17865	1.03387	1.06088	0.973436	1.04282	0.944153	1.05059	0.951122	1.07548	1.06236	0.915565	1.09348	1.02415	0.0211743	13
148	294	0.925477	1.2081	0.987749	1.04533	0.987734	1.06353	0.929693	0.966027	0.944603	0.988675	1.01594	0.947843	1.11167	1.00941	0.0224801	13
149	296	0.938126	1.1723	1.03005	1.0154	0.94473	1.02921	0.884107	0.971767	1.00712	1.00653	1.0124	0.938564	1.12428	1.00574	0.0214582	13
150	298	0.893035	1.1874	1.06059	1.05161	0.959809	1.03822	0.970696	0.980769	0.959593	1.03378	1.05024	0.905429	1.11063	1.01552	0.0227229	13
151	300	0.932693	1.1906	0.994094	1.05162	1.02021	1.07733	0.919544	0.948206	1.01502	1.0536	1.02181	0.926955	1.1107	1.02018	0.0219222	13
152	302	0.908309	1.19258	0.992558	1.07028	0.979538	1.01807	0.94076	0.980906	1.02353	1.05393	1.06083	0.907131	1.11927	1.01905	0.0227022	13
153	304	0.950331	1.15499	0.994924	1.04962	0.988837	1.04658	0.942488	0.972398	0.980416	1.02364	1.0192	0.939136	1.12387	1.01434	0.0184367	13
154	306	0.927663	1.21184	1.01413	1.05135	0.934391	1.03146	0.993925	0.991611	0.972909	1.02073	0.992768	0.942604	1.11457	1.01538	0.0216186	13
155	308	0.918391	1.18701	0.986755	1.06674	0.9545	1.06377	0.950594	0.983104	0.932366	1.01538	1.01082	0.931278	1.13263	1.01026	0.0227864	13
156	310	0.992312	1.16838	0.988132	1.0457	0.959856	1.0031	0.947324	0.949186	1.03632	0.998222	1.03687	0.930881	1.11981	1.01354	0.0191229	13
157	312	0.944598	1.19607	0.995492	1.0524	1.02133	1.01212	0.952804	0.983055	1.06213	1.0357	1.02635	0.927037	1.13789	1.02669	0.0209245	13
158	314	0.990096	1.21024	1.03057	1.07879	0.954241	1.05042	0.904357	0.976612	1.04971	1.00163	1.00691	0.936461	1.1343	1.02495	0.0229651	13
159	316	0.923758	1.18764	0.938951	1.05742	0.990194	1.03705	0.944683	1.00157	1.04676	1.05482	0.982064	0.895836	1.11744	1.01371	0.0226868	13
160	318	0.962554	1.19721	0.972527	1.0325	0.990415	1.0586	0.938156	0.940929	0.955375	0.97999	1.01227	0.944404	1.13732	1.0094	0.0221138	13
161	320	0.960259	1.21814	1.01285	1.0867	0.957363	1.02165	0.911906	0.945796	0.940023	0.981425	1.0199	0.912721	1.15685	1.00966	0.0259654	13
162	322	0.932901	1.19251	0.958576	1.07568	0.977961	1.03065	0.894214	0.957531	0.973783	1.00245	1.0243	0.944674	1.12308	1.00679	0.0229718	13
163	324	0.904872	1.20676	0.995557	1.04282	0.967651	1.04831	0.907991	0.968958	0.968536	0.967258	0.97212	0.929473	1.09033	0.997741	0.0229781	13
164	326	1.0028	1.20435	0.956658	1.0495	0.953334	1.04335	1.02227	0.945736	0.913023	0.986324	1.00097	0.925205	1.1308	1.01033	0.023019	13
165	328	0.952028	1.18307	0.983498	1.0789	0.980053	1.03834	0.91848	0.923392	1.02875	1.01658	1.01003	0.928384	1.1329	1.01342	0.022411	13
166	330	0.947226	1.17662	0.971932	1.08673	0.952239	1.03645	0.968334	1.02444	0.986947	0.98325	0.973853	0.945541	1.12846	1.014	0.0204988	13
167	332	0.973396	1.19982	0.978872	1.02619	1.00556	1.04315	0.958591	1.03434	0.977172	1.03149	1.01544	0.932755	1.11205	1.02222	0.0194419	13
168	334	0.955306	1.2065	0.975113	1.05823	0.994649	1.06267	0.960133	1.01792	0.954397	0.974274	1.02821	0.923002	1.1533	1.02029	0.0229459	13
169	336	0.968789	1.18828	0.971773	0.988581	0.96396	1.03172	0.949653	0.982694	0.951338	1.01643	1.02511	0.943677	1.1147	1.00744	0.019834	13
170	338	0.952482	1.20241	0.987991	1.05443	0.933164	1.04878	0.938935	1.00609	1.03805	1.0829	1.00289	0.938349	1.13657	1.02485	0.0226032	13
171	340	0.949085	1.19616	1.03915	1.06132	0.977127	1.00267	0.973645	0.957144	0.974144	1.04626	0.970807	0.922778	1.13927	1.01612	0.0219363	13
172	342	0.924626	1.21809	0.985048	1.06458	0.974101	1.0408	0.927743	1.04599	0.94502	0.96736	0.968615	0.926016	1.12582	1.00875	0.0243757	13
173	344	0.975216	1.22164	1.03415	1.06303	0.964364	1.0446	0.953885	0.977791	0.966203	0.984464	1.02109	0.92433	1.1507	1.02165	0.0233322	13
174	346	0.938145	1.18864	0.997098	1.04589	0.975255	1.06464	0.952951	0.988998	1.08821	0.987542	1.02377	0.933808	1.12829	1.02409	0.0212498	13
175	348	0.965678	1.19839	1.00962	1.08527	1.00521	1.0337	0.972095	0.965768	0.980642	1.01399	1.02662	0.928656	1.1508	1.02588	0.021396	13
176	350	0.972074	1.22934	0.959323	1.01852	0.932148	1.05381	0.951054	0.9494	0.929056	1.01739	0.997912	0.900065	1.12397	1.00262	0.0251198	13
177	352	0.91658	1.20072	0.968922	1.02869	0.944484	1.02306	0.961323	1.00249	0.975206	0.975625	1.04003	0.936648	1.14406	1.00906	0.022739	13
178	354	0.925837	1.23984	0.959957	1.00246	0.955125	1.03788	0.981276	0.920836	0.951782	1.06807	1.02597	0.920279	1.12217	1.00857	0.0256524	13
179	356	0.91718	1.20967	0.954638	1.05875	0.945536	1.02198	0.949772	0.918579	0.92138	1.04411	1.01991	0.918527	1.12133	1.0001	0.0251678	13
180	358	0.936486	1.22462	0.987283	1.03446	0.998283	1.02829	0.970897	0.960812	0.968076	1.05817	1.04493	0.938845	1.13579	1.02207	0.0228275	13
181	360	0.93241	1.21078	0.952265	1.07319	0.959231	1.0472	0.968278	0.910897	0.947111	1.07142	0.933542	0.94117	1.14595	1.00719	0.0260512	13
182	362	0.964054	1.21655	0.998796	1.09305	0.936346	1.03868	0.96202	0.938808	0.910255	1.00129	0.989856	0.93198	1.1264	1.00831	0.0247352	13
183	364	0.929871	1.20675	0.981542	1.02619	0.972046	1.0305	0.947276	0.923346	0.92229	0.998272	0.988581	0.930134	1.15544	1.00094	0.0245814	13
184	366	0.941763	1.20725	0.963499	1.08093	0.91109	1.03425	0.962511	1.00752	0.925956	1.01403	0.975507	0.939731	1.12368	1.00675	0.0239367	13
185	368	0.922185	1.21735	0.972118	1.03694	0.945197	1.03786	0.960532	1.01381	0.974536	0.991816	1.01053	0.936886	1.15822	1.01369	0.0238896	13
186	370	0.944569	1.21228	1.02005	1.00809	0.973898	1.03368	0.948205	0.92897	0.92	0.99686	1.01236	0.937704	1.1325	1.00532	0.0234489	13
187	372	0.963505	1.24041	0.979232	1.03734	0.960211	1.00247	0.918838	0.927645	0.943929	0.978135	0.965689	0.945155	1.1417	1.00033	0.0256021	13

## Sheet: Magnets1x Wt 28C
Depletion of cytosolic pool of prey
Magnets 1x Wt 28C
	Time (s)	Cell1	Cell2	Cell3	Cell4	Cell5	Cell6	Cell7	Cell8	Cell9	Cell10	Cell11	Cell12	Cell13	Cell14	Cell15	Cell16	Cell17	Average	ES	N
1	0	1	1	1	1	1	1	1	1	1	1	1	1	1	1	1	1	1	1	2.33193e-17	17
2	2	1.02194	1.0191	0.938057	0.977358	1.00897	1.04372	0.958501	0.96847	1.02737	1.04009	0.918835	1.01394	1.01419	0.927345	0.969967	1.00171	1.01969	0.992309	0.00990988	17
3	4	1.05419	0.988326	1.00276	0.974731	0.999525	0.984356	0.971044	0.951538	1.05123	1.02152	1.00933	1.07981	1.02707	1.00451	1.01365	0.993779	0.976565	1.00611	0.00827286	17
4	6	1.04491	1.1491	0.964816	0.969302	0.979165	1.01667	0.992624	0.985613	1.0182	1.05864	1.05346	0.978266	1.03301	0.960265	1.00113	0.968955	0.987746	1.00952	0.00759591	17
5	8	1.03842	1.14768	0.973495	0.955518	1.00727	1.05211	0.963355	1.01396	1.02469	1.0051	1.01618	0.989868	1.05665	0.985933	0.99247	1.00148	0.9872	1.01243	0.00634875	17
6	10	1.0008	1.12876	0.964573	0.956773	0.991658	1.01344	0.996979	0.991362	1.03971	0.988718	1.09388	1.01112	0.935167	1.02445	0.985287	0.983323	0.953726	1.00351	0.00949869	17
7	12	0.83275	0.953152	0.762786	0.737998	0.918411	0.844607	0.9909	0.976817	0.899216	0.851499	0.986232	1.01029	0.875405	0.894745	0.967303	0.961219	0.963564	0.907465	0.0135705	17
8	14	0.67245	0.817769	0.665022	0.683434	0.887662	0.739614	1.02075	0.911467	0.849936	0.866407	0.853527	1.03416	0.877708	0.867746	0.993861	0.904981	1.01003	0.862149	0.0205074	17
9	16	0.58697	0.624991	0.652359	0.608613	0.868516	0.814855	1.01809	0.947554	0.80314	0.796411	0.745479	0.929235	1.0124	0.934072	1.02015	0.915853	0.956485	0.837363	0.0222141	17
10	18	0.573539	0.608073	0.617112	0.597555	0.849478	0.786853	1.00739	0.909619	0.811129	0.842435	0.680757	0.853271	0.992697	0.858406	0.960245	0.913221	0.9517	0.812558	0.0220396	17
11	20	0.549353	0.532373	0.601228	0.562746	0.806366	0.773642	1.00503	0.914953	0.761713	0.83972	0.706159	0.812329	0.837125	0.906717	0.987385	0.876362	0.913159	0.787433	0.0212714	17
12	22	0.493482	0.428991	0.575145	0.54159	0.809004	0.778492	1.02249	0.894332	0.716788	0.858499	0.519859	0.901555	0.85969	0.872904	1.00005	0.896602	0.940006	0.771145	0.031417	17
13	24	0.465009	0.455704	0.572029	0.531791	0.798422	0.774763	1.0096	0.890639	0.711507	0.838056	0.649253	0.844755	0.793535	0.831623	0.998526	0.913859	0.979808	0.768169	0.026345	17
14	26	0.447607	0.426954	0.587596	0.530674	0.768508	0.783305	1.02293	0.878897	0.740088	0.811561	0.665576	0.818875	0.786154	0.839512	0.981279	0.89549	1.02079	0.765047	0.0264688	17
15	28	0.50452	0.446043	0.593143	0.533171	0.755446	0.768547	1.01457	0.898027	0.730484	0.846858	0.621852	0.801385	0.861834	0.814453	0.977465	0.893776	0.93648	0.764591	0.0261446	17
16	30	0.465901	0.378011	0.568872	0.572647	0.753048	0.766056	1.01336	0.906127	0.735762	0.848322	0.666153	0.83471	0.772541	0.791806	0.96263	0.883241	0.910909	0.754712	0.0239498	17
17	32	0.453205	0.332558	0.556654	0.560774	0.740698	0.769071	1.00393	0.869373	0.701219	0.81231	0.559842	0.847513	0.788484	0.844522	0.966925	0.929695	0.987935	0.748512	0.0304515	17
18	34	0.429839	0.339267	0.552336	0.54245	0.717743	0.737269	1.02232	0.902564	0.733841	0.904723	0.592956	0.799898	0.714945	0.796436	0.989382	0.906506	0.994168	0.745685	0.0319243	17
19	36	0.433912	0.350423	0.574828	0.550472	0.724625	0.696952	1.01861	0.898546	0.739148	0.826612	0.62382	0.810183	0.755489	0.858595	0.966502	0.897667	0.971935	0.74696	0.0288653	17
20	38	0.444446	0.395417	0.547694	0.552876	0.695314	0.726618	0.997525	0.889622	0.727537	0.846184	0.61384	0.789215	0.740201	0.793018	0.975074	0.891321	0.968187	0.740829	0.0289946	17
21	40	0.443554	0.407774	0.555785	0.553436	0.695986	0.698784	0.998644	0.892425	0.727677	0.793948	0.601802	0.863008	0.898474	0.787991	0.960661	0.892101	0.948816	0.748286	0.0291951	17
22	42	0.444591	0.4061	0.557821	0.559124	0.693335	0.715506	1.00221	0.88851	0.693804	0.789554	0.55223	0.850085	0.735962	0.806246	0.972899	0.918796	0.934834	0.736565	0.0318565	17
23	44	0.423605	0.44363	0.57254	0.557484	0.679299	0.758356	1.02922	0.880713	0.700267	0.789311	0.629373	0.786591	0.725537	0.822132	0.958012	0.909492	1.02873	0.746723	0.0315633	17
24	46	0.411027	0.384899	0.544317	0.579812	0.672125	0.761156	1.04747	0.901213	0.681774	0.770005	0.594462	0.770619	0.80373	0.790864	0.972673	0.882321	0.983455	0.738348	0.0323538	17
25	48	0.430567	0.376992	0.570213	0.569981	0.679477	0.704788	1.02451	0.861206	0.723685	0.783918	0.560633	0.781076	0.782161	0.772039	0.99374	0.900907	0.963862	0.734103	0.0325251	17
26	50	0.442228	0.379066	0.571929	0.569147	0.66155	0.73759	1.0256	0.880104	0.699239	0.784194	0.554881	0.769194	0.684447	0.849835	1.00502	0.902808	0.954819	0.733627	0.0345346	17
27	52	0.43494	0.385444	0.557729	0.570271	0.645151	0.726602	0.98787	0.857327	0.704581	0.778217	0.571606	0.794493	0.840853	0.840317	0.978796	0.891573	0.969713	0.737381	0.0312703	17
28	54	0.45512	0.330699	0.57032	0.567345	0.644043	0.719085	1.02577	0.887373	0.719791	0.793724	0.536437	0.773531	0.765469	0.788977	0.990891	0.886162	1.0003	0.732649	0.0350128	17
29	56	0.436422	0.314416	0.570402	0.569038	0.622884	0.738451	0.995993	0.855171	0.728665	0.784373	0.565081	0.84073	0.742549	0.831849	1.0043	0.92368	0.969302	0.734901	0.0332576	17
30	58	0.388983	0.353766	0.582582	0.562783	0.63045	0.733325	1.01867	0.865309	0.715057	0.789522	0.618836	0.679362	0.709905	0.879288	1.00099	0.901526	1.03656	0.733348	0.0356029	17
31	60	0.42435	0.340447	0.557693	0.577406	0.631987	0.696767	0.95639	0.90713	0.717438	0.767854	0.521435	0.790511	0.737734	0.834494	1.01793	0.91046	0.982842	0.727816	0.0355724	17
32	62	0.422039	0.40656	0.582638	0.569131	0.627859	0.704173	1.00391	0.864203	0.736955	0.769339	0.557841	0.794912	0.751357	0.850476	1.03244	0.880988	0.985569	0.73767	0.0347305	17
33	64	0.360705	0.405453	0.565785	0.561759	0.627464	0.713394	1.02147	0.839067	0.711742	0.731246	0.517998	0.739677	0.745082	0.832514	1.00693	0.901894	1.0077	0.722934	0.0373076	17
34	66	0.427575	0.418867	0.565691	0.591252	0.619019	0.706727	1.01029	0.860577	0.741145	0.772229	0.544313	0.815845	0.64703	0.824036	0.966345	0.911147	1.0037	0.730929	0.0360192	17
35	68	0.395293	0.352374	0.564474	0.572252	0.629112	0.732609	1.02515	0.861393	0.715658	0.767285	0.571552	0.741255	0.753767	0.837513	0.975076	0.863704	0.94985	0.724019	0.0322897	17
36	70	0.432026	0.370804	0.572572	0.568352	0.61621	0.726242	1.00365	0.883204	0.720964	0.777884	0.515817	0.763162	0.692052	0.826158	0.970374	0.884148	0.933	0.720978	0.0344436	17
37	72	0.517565	0.486139	0.605008	0.609214	0.625788	0.76198	1.01227	0.900398	0.925968	0.770158	0.609842	0.770836	0.634975	0.909775	0.999754	0.928425	0.95495	0.766061	0.0348501	17
38	74	0.525889	0.519326	0.635667	0.624916	0.621896	0.793086	1.02553	0.890129	0.936803	0.759006	0.637723	0.775307	0.710715	0.934203	0.962935	0.909655	0.940801	0.776681	0.0315772	17
39	76	0.594372	0.56392	0.648225	0.651992	0.638916	0.8013	0.994951	0.900486	0.973239	0.761151	0.645322	0.806866	0.726033	0.919701	0.943175	0.933191	0.933209	0.790356	0.0296773	17
40	78	0.589463	0.544074	0.67593	0.664033	0.646947	0.818296	1.02713	0.914435	0.943395	0.781058	0.655381	0.887794	0.727472	0.887958	0.949802	0.959816	0.960591	0.801975	0.0297305	17
41	80	0.633498	0.639626	0.669878	0.702804	0.65678	0.817719	1.00944	0.903927	0.953607	0.744955	0.759025	0.797873	0.854128	0.925086	0.970208	0.92973	0.936033	0.817901	0.0252425	17
42	82	0.687969	0.672198	0.718073	0.71369	0.656709	0.855236	0.993499	0.912561	0.973384	0.778905	0.695492	0.871057	0.767247	0.937307	0.967782	0.923885	0.991194	0.830364	0.0275148	17
43	84	0.669727	0.717313	0.703822	0.759282	0.688108	0.871639	0.989416	0.909902	1.00207	0.749012	0.816998	0.796354	0.719849	0.920093	0.96927	0.97006	0.943804	0.835101	0.0261518	17
44	86	0.773267	0.787154	0.729438	0.728733	0.696366	0.880781	1.02863	0.932225	1.0029	0.78837	0.788484	0.898399	0.76657	0.969003	0.979317	0.942535	0.931734	0.86023	0.0248417	17
45	88	0.745365	0.690606	0.764009	0.793282	0.701074	0.851852	1.00393	0.883347	0.975749	0.772749	0.833603	0.846586	0.837215	0.950884	0.994837	0.95386	0.922524	0.854204	0.0220097	17
46	90	0.81595	0.815411	0.764949	0.78027	0.720865	0.913385	0.982621	0.929985	1.02096	0.827099	0.824407	0.875694	0.729971	0.95503	0.98042	0.946543	0.904936	0.869911	0.0228211	17
47	92	0.778716	0.867434	0.774484	0.765861	0.720866	0.934822	1.01446	0.915911	1.01945	0.859909	0.870086	0.860054	0.815437	0.942861	0.978189	0.961292	0.941203	0.88359	0.0203141	17
48	94	0.812735	0.852031	0.757007	0.818284	0.724893	0.928302	1.01054	0.952812	1.03476	0.78665	0.923087	0.932668	0.860856	0.973293	0.988799	0.945696	0.950365	0.897222	0.0211172	17
49	96	0.862729	0.952696	0.744147	0.841738	0.743904	0.878304	1.00927	0.914219	1.00544	0.797581	0.898135	0.931873	0.787442	0.956936	0.996395	0.949807	0.976216	0.896873	0.021175	17
50	98	0.830408	0.9047	0.812013	0.813198	0.792035	0.923335	1.00746	0.927551	1.03912	0.810657	0.918681	0.937038	0.734117	0.974097	0.971519	0.971896	1.01198	0.904694	0.0223106	17
51	100	0.875348	0.917954	0.782004	0.852264	0.760255	0.890753	0.996215	0.927899	1.03208	0.767532	0.951604	0.932987	0.80763	0.945011	0.991454	0.944575	0.933261	0.900519	0.0207557	17
52	102	0.892849	1.02855	0.829294	0.840524	0.765943	1.01778	1.00319	0.925728	0.998802	0.841891	0.963754	0.962531	0.760553	1.00112	1.00931	0.949896	0.921503	0.924307	0.0215955	17
53	104	0.899457	0.997255	0.827201	0.869444	0.804407	0.949215	0.996742	0.950286	1.00876	0.794605	1.01137	0.937963	0.821769	0.983881	1.02721	0.970811	0.957378	0.929868	0.0194936	17
54	106	0.94773	1.00137	0.816886	0.864313	0.778799	0.944479	0.998876	0.937568	1.02902	0.802589	0.915704	0.960352	0.75506	0.981407	0.975813	0.948673	0.987261	0.920347	0.0214182	17
55	108	0.858901	1.07049	0.776569	0.873026	0.803007	0.974741	0.996862	0.93268	1.00824	0.847572	1.01191	0.931735	0.825148	0.964173	0.99328	0.963402	0.934811	0.927444	0.0169786	17
56	110	0.942342	1.05737	0.817616	0.886181	0.811783	0.963681	1.00048	0.931384	1.02334	0.828082	1.01572	0.957307	0.891131	0.993593	0.974112	0.939743	0.967319	0.941247	0.01611	17
57	112	0.940383	1.00501	0.809491	0.866894	0.789378	0.929062	1.00177	0.929198	1.04855	0.778765	0.935783	0.885348	0.780085	0.966458	0.960111	0.964451	0.970758	0.915382	0.0209694	17
58	114	0.91777	1.10005	0.836691	0.873036	0.794873	0.935772	0.971366	0.934503	1.01844	0.821807	1.07425	0.946336	0.898421	0.981856	1.00258	0.95861	0.987481	0.944344	0.0184455	17
59	116	0.901428	1.1587	0.820325	0.868997	0.820859	0.98237	1.02543	0.905803	1.04093	0.812392	1.04235	0.973516	0.981134	0.969439	1.0081	0.986594	0.974708	0.95724	0.017988	17
60	118	0.9335	1.12628	0.818967	0.864728	0.817986	0.961458	0.993897	0.950413	0.990509	0.827974	1.05874	0.99258	0.851997	0.979034	1.01866	0.993501	0.967313	0.949855	0.0180934	17
61	120	0.915917	1.02172	0.800964	0.908344	0.841807	0.990521	1.00976	0.916106	0.997578	0.851543	1.09078	1.06578	0.800096	0.934893	1.01494	0.97112	0.963947	0.946812	0.0210104	17
62	122	0.923952	1.11743	0.834039	0.909988	0.81849	0.970594	0.986697	0.917375	0.949689	0.805916	1.13955	0.999881	0.878235	0.953304	0.999594	0.987468	1.00393	0.952713	0.0211155	17
63	124	0.875813	1.08035	0.852973	0.878239	0.799844	0.974415	0.968265	0.917045	1.01326	0.815076	1.01663	0.987117	0.780029	0.93459	1.01219	0.968538	1.01931	0.934923	0.0209037	17
64	126	0.892122	1.15837	0.822332	0.89944	0.848624	0.943668	0.970868	0.954688	0.966151	0.887285	1.07666	0.975392	0.87106	0.963088	0.998908	0.963479	1.02129	0.953731	0.0148648	17
65	128	0.966887	1.09115	0.811577	0.918675	0.855118	1.00892	1.01273	0.963534	1.00445	0.835217	1.0941	0.994785	0.850267	1.03784	1.01012	0.964795	0.979369	0.964678	0.0188664	17
66	130	0.959655	1.145	0.811184	0.903953	0.836524	0.972373	0.985289	0.955333	0.995595	0.835023	1.13045	1.05483	0.853699	0.964134	0.963817	0.9609	0.973917	0.958922	0.0201124	17
67	132	0.94248	1.07431	0.794207	0.893197	0.864086	0.973938	0.971628	0.955628	0.998978	0.877657	1.01424	0.986114	0.785243	0.982217	1.02247	0.957574	0.960154	0.94436	0.0164365	17
68	134	0.96129	1.05666	0.80907	0.911874	0.864304	1.01353	0.994936	0.922447	0.993502	0.831897	1.06191	0.995083	0.844418	0.99381	0.963625	0.985769	0.961946	0.950945	0.0169734	17
69	136	0.911639	1.12956	0.805712	0.903278	0.872157	1.01148	0.993083	0.952665	0.982279	0.853131	1.06398	1.01465	0.792776	0.935045	0.981996	0.968693	0.980074	0.950129	0.0180293	17
70	138	0.966958	1.12244	0.810797	0.900838	0.844447	0.946432	0.980995	0.961676	0.993886	0.829686	0.979166	1.05678	0.797266	0.96803	0.973477	0.931091	0.96918	0.943126	0.017818	17
71	140	0.961084	1.186	0.823577	0.885744	0.842242	1.04828	0.972633	0.947068	0.99279	0.894805	0.971835	0.970094	0.84231	0.99063	0.975308	0.99382	0.939988	0.955189	0.0145827	17
72	142	0.975996	1.14724	0.808836	0.890675	0.870837	1.02147	1.00315	0.903462	0.983043	0.882048	0.97039	0.999722	0.81577	0.972047	0.982285	0.983181	0.892518	0.947216	0.0154248	17
73	144	1.00161	1.11761	0.819264	0.911395	0.879036	1.02458	0.984322	0.936477	1.03714	0.882532	0.99931	1.02825	0.761957	0.950526	0.973485	0.983091	0.920872	0.953615	0.0185905	17
74	146	0.993991	1.07885	0.801384	0.906522	0.889883	1.01103	1.00353	0.931427	0.980712	0.854198	1.07077	0.978413	0.928258	0.949481	0.985806	0.998772	0.932952	0.958587	0.0137178	17
75	148	0.997631	1.17185	0.806426	0.91825	0.868908	0.961842	0.966856	0.89739	0.991298	0.900747	0.957014	1.00091	0.917313	0.965472	0.999005	0.956355	1.01608	0.958432	0.0109524	17
76	150	1.01471	1.24086	0.820364	0.934128	0.882854	0.951647	0.942575	0.891778	0.956758	0.877986	0.988874	1.087	0.799247	0.963229	0.974731	0.978491	1.01275	0.959882	0.0173764	17
77	152	0.969252	1.1837	0.839062	0.921797	0.89538	0.979578	0.976941	0.930966	1.0006	0.90886	1.11065	0.973646	0.869939	0.957803	0.990538	0.96983	1.01342	0.970115	0.0147014	17
78	154	0.94918	1.21463	0.795046	0.927217	0.885469	1.02021	1.01172	0.911453	1.01396	0.834531	1.06242	0.959146	0.859607	0.956268	0.991553	0.990072	1.01138	0.964345	0.0168515	17
79	156	0.943909	1.06954	0.798878	0.921238	0.89372	0.984058	0.989728	0.905571	0.953436	0.903906	1.00531	0.984243	0.841415	0.95511	1.00389	1.00477	0.976526	0.949132	0.0126155	17
80	158	0.955853	1.30909	0.816308	0.924506	0.888948	0.9937	0.99241	0.89247	0.996354	0.890361	1.03741	1.04264	0.908121	0.935408	0.971993	0.983199	0.939619	0.969317	0.0131315	17
81	160	0.997884	1.15486	0.807275	0.924316	0.874029	0.993801	0.9857	0.886394	1.00803	0.915947	0.989991	1.07724	0.894591	0.928737	1.01238	0.998466	1.01902	0.968745	0.0149557	17
82	162	0.922076	1.11795	0.818122	0.942544	0.882889	0.996825	0.99359	0.891689	1.00494	0.821597	1.06037	1.06612	0.851867	0.98541	1.02249	0.993782	0.945198	0.95985	0.0189306	17
83	164	0.945371	1.13749	0.848227	0.946957	0.897092	0.98014	0.991324	0.899709	1.01543	0.875353	0.957726	1.02986	0.882712	0.987053	0.989519	0.981708	1.03021	0.964464	0.0134621	17
84	166	0.974158	1.17485	0.832481	0.960708	0.909309	1.04591	0.987132	0.959461	0.991511	0.925417	1.05511	1.00792	0.855468	1.01272	0.972633	0.954509	0.978931	0.976366	0.0133006	17
85	168	0.942383	1.15209	0.832315	0.927884	0.90345	0.985975	0.960461	0.910651	0.996406	0.876029	1.09816	1.12241	0.768674	0.991897	1.00883	1.01989	0.988488	0.969764	0.0224476	17
86	170	0.994487	1.1561	0.816086	0.924736	0.903737	1.01158	0.98329	0.937443	1.07709	0.880442	1.04625	0.968425	0.808197	1.01078	0.995803	1.01619	0.985954	0.971565	0.0176487	17
87	172	0.960335	1.13777	0.812982	0.951577	0.926381	1.05264	1.00718	0.916819	1.01881	0.886792	1.09259	1.14269	0.93303	0.955666	1.02468	0.983622	0.989966	0.987854	0.0177572	17
88	174	0.984715	1.09788	0.838438	0.937963	0.91258	1.07511	1.01456	0.921375	1.0296	0.90842	1.09533	0.992308	0.864546	0.907522	0.990155	1.00292	0.915455	0.969934	0.0173916	17
89	176	1.00913	1.20575	0.816779	0.936398	0.918773	1.03932	0.981964	0.904153	1.02906	0.873856	1.01403	0.974859	0.764523	0.998244	0.988468	0.98616	0.971755	0.965483	0.0182756	17
90	178	0.988802	1.15291	0.810148	0.944328	0.9097	1.01797	0.981156	0.920454	1.00126	0.946559	1.11189	1.0662	0.912066	0.979277	0.985331	0.970119	0.969248	0.980436	0.0141958	17
91	180	0.960183	1.21499	0.800098	0.914303	0.911577	1.07762	0.988698	0.928082	0.984526	0.888569	1.11566	0.940132	0.963242	1.00269	1.02286	0.969321	0.99912	0.981274	0.0153805	17
92	182	0.990912	1.2382	0.793242	0.929723	0.910729	1.07781	0.978014	0.941832	1.00555	0.889131	0.99753	1.09932	0.788336	0.910291	0.981599	0.978096	1.00782	0.971654	0.0197193	17
93	184	0.981641	1.19127	0.839995	0.918659	0.914683	1.04196	0.975167	0.917754	0.992284	0.878689	1.06904	1.01179	0.842652	0.969436	0.995014	0.978579	0.96349	0.969536	0.0153507	17
94	186	0.923897	1.25254	0.829362	0.906493	0.929015	1.02144	0.996263	0.953627	1.0207	0.878466	1.09654	1.03888	0.744597	0.980817	0.998237	0.971916	0.982349	0.972067	0.0208715	17
95	188	1.02948	1.22436	0.831388	0.947719	0.911567	1.05638	0.979458	0.930416	0.985892	0.892101	1.07847	0.997229	0.836548	0.97597	0.981677	0.965882	0.945582	0.974713	0.0155845	17
96	190	0.966137	1.17523	0.838264	0.932442	0.892997	1.034	0.983796	0.952666	1.02139	0.836903	1.0488	1.06125	0.837235	0.934214	0.97513	0.973882	0.954961	0.965841	0.0176804	17
97	192	1.01978	1.18332	0.810642	0.933669	0.920335	1.02548	1.00116	0.926276	0.987199	0.903511	1.0654	0.987343	0.886559	0.966005	0.972978	1.00202	0.966867	0.974032	0.0122412	17
98	194	1.02514	1.25956	0.815531	0.964076	0.912265	1.08268	1.03047	0.922365	1.01035	0.882757	1.03374	1.01243	0.832904	0.924682	1.01163	0.997886	0.942518	0.980057	0.0173148	17
99	196	0.925927	1.22295	0.798642	0.926293	0.937246	1.03367	0.985822	0.909661	1.031	0.862578	1.067	0.992587	0.895733	1.01374	0.994748	0.99322	0.984114	0.974996	0.0144065	17
100	198	1.0271	1.19357	0.836934	0.914397	0.953111	1.05678	0.992701	0.911922	1.03276	0.872097	1.10053	1.04264	0.79386	0.996277	0.988167	0.976273	0.991331	0.981204	0.0197208	17
101	200	1.01664	1.15454	0.834078	0.948254	0.921475	1.03601	1.01922	0.935942	1.01129	0.88675	1.02919	1.05817	0.821008	0.921022	1.01179	0.969334	0.979922	0.973802	0.0166633	17
102	202	0.973814	1.17329	0.799025	0.944239	0.92411	1.06292	1.01392	0.946737	1.05594	0.882336	0.922322	1.06355	0.866134	0.920079	0.9998	0.973855	0.973636	0.970336	0.0161946	17
103	204	1.01508	1.21961	0.777297	0.919638	0.931505	1.07178	0.993807	0.956175	1.0044	0.874001	0.966348	1.02823	0.814841	0.945507	0.976842	0.970724	0.895308	0.962417	0.0162993	17
104	206	0.980264	1.22293	0.816647	0.9348	0.936516	0.982024	0.975301	0.934698	1.01559	0.8746	1.06361	1.04778	0.949151	0.969924	0.948722	1.00504	0.999948	0.979855	0.0123034	17
105	208	1.02471	1.24087	0.799613	0.919231	0.925809	1.05772	1.01705	0.942765	0.994239	0.938843	1.08098	1.1064	1.00511	0.993116	0.946088	0.956658	0.977625	0.995695	0.0138547	17
106	210	0.984789	1.28455	0.800197	0.915603	0.919887	1.07568	1.00427	0.971643	1.018	0.896042	1.02927	1.00916	0.933926	0.966263	0.996282	0.993327	0.942899	0.984812	0.0119861	17
107	212	0.979703	1.1987	0.802677	0.910415	0.945045	1.08976	1.0097	0.927093	1.00646	0.863637	0.963398	1.03809	0.982519	0.983202	0.98292	1.0267	0.96406	0.980829	0.0134971	17
108	214	0.992459	1.21736	0.783305	0.902868	0.927005	1.10396	1.02421	0.952411	1.00878	0.84326	1.09908	1.0563	0.854156	0.944979	0.993508	0.975095	0.952627	0.978316	0.0196084	17
109	216	0.996265	1.27094	0.792885	0.926092	0.9402	1.11112	1.00174	0.921119	1.0289	0.907795	0.996132	1.12402	0.934691	0.981301	0.964734	0.987721	0.990083	0.992691	0.0159736	17
110	218	0.9691	1.23586	0.788213	0.935301	0.942875	1.0957	1.0229	0.963814	1.0074	0.943986	0.942011	1.14003	0.833233	0.979747	0.981863	0.995857	0.974843	0.985455	0.0181558	17
111	220	0.894544	1.37672	0.778681	0.892215	0.947213	1.04922	0.994231	0.94251	1.0193	0.901009	1.05216	1.07974	0.770427	0.980804	0.95718	0.988738	0.996427	0.977713	0.0191633	17
112	222	0.941989	1.29576	0.796783	0.908414	0.9402	1.07923	1.01786	0.925661	0.994565	0.899828	1.04074	1.0235	1.10846	0.955123	0.957649	0.992259	0.99097	0.992293	0.0145631	17
113	224	0.957957	1.27279	0.805792	0.891353	0.936541	1.08145	1.03175	0.931076	1.04207	0.884452	1.18325	1.06035	0.874637	0.93165	0.98892	1.00779	0.945785	0.989859	0.0211784	17
114	226	0.940033	1.25272	0.788142	0.925475	0.923161	1.11429	0.982967	0.929871	1.03083	0.90447	1.20258	1.12589	0.872484	0.968075	0.946198	0.995559	0.94059	0.990784	0.0236968	17
115	228	0.966245	1.13513	0.775299	0.904743	0.958664	1.14066	0.996245	0.970823	0.984354	0.919013	0.977023	1.06696	0.932333	0.967734	0.991259	1.00138	0.930147	0.97753	0.0144674	17
116	230	0.965894	1.20084	0.76424	0.929332	0.926703	1.06863	0.999128	0.940036	1.01083	0.914209	1.0455	1.06904	0.958528	0.982005	0.962861	0.992275	1.00749	0.984561	0.012202	17
117	232	1.0114	1.19698	0.792902	0.883996	0.944235	1.10134	1.01116	0.914111	0.984959	0.930494	1.12597	1.06572	0.924319	0.966789	0.985475	0.966505	0.976671	0.987237	0.0162741	17
118	234	0.989838	1.28385	0.753702	0.929476	0.948583	1.10475	1.00541	0.972674	1.00627	0.921367	1.0883	1.09343	0.948284	0.910969	0.999748	0.971817	0.950044	0.992854	0.0157431	17
119	236	0.959041	1.0883	0.790924	0.893573	0.958107	1.13045	0.98722	0.966811	1.0373	0.863849	1.11962	1.16434	0.92771	0.995043	0.997091	0.986832	0.963585	0.989988	0.020687	17
120	238	0.978132	1.26077	0.759704	0.896237	0.950801	1.10284	0.981871	0.97507	1.02818	0.876784	1.09312	1.00992	0.867427	0.939346	0.987011	0.996414	1.00101	0.982626	0.0167666	17
121	240	1.01437	1.25126	0.757323	0.902632	0.954677	1.11848	1.00792	0.946386	1.03382	0.888695	1.10178	0.998724	0.91922	0.978081	0.985279	0.998364	0.98851	0.990913	0.0156221	17
122	242	1.04433	1.25627	0.791651	0.904413	0.953703	1.13649	0.994672	0.955202	1.0857	0.867045	1.09691	1.02154	0.880903	0.932231	0.987602	0.946884	0.990729	0.990957	0.0195268	17
123	244	1.02243	1.30134	0.812987	0.89466	0.934223	1.13094	0.998941	0.952454	1.00192	0.912749	1.00273	1.04105	0.916717	0.947893	0.962832	0.983888	0.982233	0.988235	0.0140954	17
124	246	0.995862	1.22152	0.775349	0.899163	0.918488	1.08693	1.02025	0.943113	1.00431	0.820124	1.07388	1.02163	0.962261	0.915759	0.989494	0.998085	0.903014	0.973484	0.0178714	17
125	248	0.982346	1.14512	0.773888	0.894925	0.951877	1.15845	0.96396	0.94113	1.02322	0.925816	1.09797	1.06548	0.942997	0.955315	0.98637	0.966201	0.922273	0.982197	0.0177091	17
126	250	0.929019	1.25815	0.814049	0.8849	0.959472	1.14531	1.01225	0.965467	1.0296	0.875082	1.07809	1.10558	0.904447	0.953884	0.978196	0.987556	0.940441	0.9895	0.0189089	17
127	252	0.937252	1.2021	0.770784	0.899049	0.94357	1.084	0.971675	0.943674	0.976402	1.00412	1.11038	1.06009	0.936948	0.916233	0.96535	1.00397	0.950633	0.980956	0.0146648	17
128	254	0.967603	1.16893	0.797115	0.902681	0.931579	1.13069	1.00614	0.947554	1.00679	0.892749	1.10044	1.10588	1.19223	0.929629	0.978746	0.953225	0.962113	0.998476	0.0223516	17
129	256	0.963593	1.18443	0.787627	0.894511	0.939243	1.13935	0.983597	0.950737	1.02566	0.907048	1.02611	1.11963	0.888503	0.95537	0.973351	0.958218	1.00905	0.982707	0.0179695	17
130	258	1.00641	1.18604	0.753231	0.882086	0.935782	1.12852	0.99066	0.941819	1.04956	0.924043	1.02311	1.13192	0.883809	0.925575	0.96238	1.0096	0.976319	0.982992	0.0185679	17
131	260	0.968372	1.21885	0.795682	0.876111	0.944651	1.13551	0.988362	0.955355	0.993525	0.908391	1.07833	1.08778	1.02418	0.903586	0.965825	1.00028	0.975078	0.989404	0.0167714	17
132	262	0.989653	1.25266	0.7757	0.874315	0.92632	1.12943	1.00948	0.944857	1.01662	0.843276	1.02117	1.04	0.952095	0.94786	0.982038	0.950975	0.968825	0.977958	0.016483	17
133	264	0.966598	1.15762	0.794143	0.887676	0.929335	1.15196	0.974641	0.953898	1.05542	0.872545	1.05201	1.06944	0.969028	0.978735	0.959734	0.987282	0.910519	0.980622	0.0181883	17
134	266	0.963215	1.10289	0.794446	0.854544	0.955407	1.09209	1.00221	0.938973	1.05279	0.864056	1.10412	1.08843	0.998007	0.98086	0.958824	0.961466	0.946039	0.979904	0.0171988	17
135	268	0.996671	1.30818	0.780457	0.874589	0.940307	1.1251	1.01923	0.964687	1.03824	0.918063	0.94706	1.07056	0.926306	0.960391	0.950503	0.990271	0.99577	0.988611	0.0147757	17
136	270	0.987733	1.23774	0.812477	0.88632	0.942635	1.11111	0.999743	0.962971	1.03	0.924792	1.04275	1.03232	0.971322	0.926433	0.978711	0.972849	0.987494	0.988671	0.0127122	17
137	272	1.01598	1.19194	0.795586	0.912826	0.940523	1.13099	0.981712	0.933995	1.03068	0.903289	1.05669	1.00792	0.9444	0.883749	0.968872	0.969468	0.980253	0.979346	0.0160197	17
138	274	0.96872	1.1798	0.793086	0.887127	0.944159	1.13387	1.00112	0.966062	1.03757	0.865234	1.08131	1.10048	0.970331	0.89324	0.970581	0.984241	1.02354	0.988262	0.0188331	17
139	276	0.967955	1.26947	0.782336	0.880503	0.933452	1.15683	0.955733	0.964701	1.00759	0.866921	0.975412	1.12606	0.991036	0.930125	0.948526	0.966962	1.04296	0.986268	0.0192591	17
140	278	0.953343	1.23981	0.788994	0.90586	0.920267	1.13409	0.966251	0.962132	1.00344	0.906692	1.10101	1.09484	0.982411	0.944378	0.977039	0.961048	0.958729	0.988255	0.0173468	17
141	280	0.967131	1.14368	0.819671	0.884264	0.932309	1.14221	0.978701	0.994155	1.00667	0.873965	1.12494	1.16607	1.01059	0.941326	0.957298	0.975805	1.00086	0.995274	0.0209495	17
142	282	1.00867	1.22372	0.809879	0.895128	0.943962	1.14068	0.997463	0.955882	1.03572	0.923711	1.04424	1.09766	0.925741	0.946752	0.9699	0.962552	0.974731	0.991552	0.0163099	17
143	284	0.969242	1.22827	0.79449	0.878816	0.922964	1.1591	0.970373	0.988008	1.02708	0.945386	1.06892	1.09715	0.956454	0.96751	0.973576	0.981248	1.00056	0.995833	0.0162568	17
144	286	0.998062	1.17857	0.77727	0.898232	0.934846	1.09273	0.988583	0.98049	1.02652	0.905074	0.99033	1.13661	1.10026	0.949149	0.974304	0.948555	0.9869	0.992146	0.0168507	17
145	288	0.984668	1.2106	0.766005	0.880618	0.921369	1.15714	0.997155	0.970138	1.04371	0.854111	0.973104	1.08243	0.960287	0.900227	0.983687	0.952496	0.954144	0.975994	0.0190251	17
146	290	0.972511	1.2605	0.817785	0.916069	0.958399	1.11531	0.979802	0.935255	1.01898	0.936225	1.00317	1.09641	0.867035	0.906616	0.970302	0.946366	0.930951	0.978335	0.0170989	17
147	292	1.00337	1.14641	0.789677	0.899361	0.928835	1.15165	0.979172	0.968608	0.977652	0.910667	1.10216	1.07064	0.924248	0.938888	0.981811	0.967559	0.982242	0.983703	0.017647	17
148	294	0.947833	1.13858	0.818877	0.893385	0.892705	1.11216	0.96124	0.98435	1.002	0.876317	1.02406	1.08722	0.94826	0.902593	0.988242	0.967189	1.01943	0.974379	0.0169868	17
149	296	1.0368	1.18516	0.788737	0.893309	0.931696	1.06675	0.965254	0.954527	0.998652	0.953649	1.10266	1.16082	1.01342	0.902106	0.976948	0.98615	0.986497	0.994302	0.0173794	17
150	298	0.971894	1.1725	0.798446	0.879511	0.940701	1.09595	0.964546	0.950607	1.02711	0.94483	1.15799	1.10526	1.00273	0.880808	0.968413	0.947111	0.991607	0.988236	0.0190818	17
151	300	0.96904	1.20948	0.782333	0.887509	0.907324	1.10959	0.953834	0.956058	1.01962	0.927921	1.05748	1.0621	1.05832	0.934886	0.958948	0.969579	0.976953	0.984763	0.0152266	17
152	302	0.921217	1.28023	0.782128	0.895664	0.943701	1.05477	0.958634	0.984375	1.05553	0.89533	1.12066	1.02905	1.03756	0.936653	0.966266	0.98239	0.997843	0.990706	0.0147424	17
153	304	0.957025	1.27668	0.79942	0.929543	0.922994	1.09848	0.947209	0.972112	1.04527	0.884831	1.09464	1.09775	0.916015	0.934029	0.993174	0.978375	0.941524	0.987592	0.017992	17
154	306	0.951595	1.25107	0.809619	0.943734	0.917859	1.08539	0.971733	0.977149	0.995936	0.92742	1.03471	1.10415	1.0892	0.947474	0.942646	0.953571	0.943486	0.990985	0.015832	17
155	308	0.972353	1.27378	0.814919	0.906302	0.936491	1.0783	0.960323	0.976337	1.00876	0.876826	1.09002	1.08467	0.985776	0.919321	0.981488	0.999165	1.00345	0.992252	0.015519	17
156	310	0.984776	1.27384	0.782927	0.916788	0.920312	1.12823	0.986178	0.96755	0.991447	0.918465	0.860948	1.103	1.10152	0.898282	0.981714	0.971462	0.990842	0.986958	0.0198147	17
157	312	0.984146	1.24584	0.781556	0.925283	0.907778	1.13734	0.989214	0.972897	1.03771	0.905323	1.03992	1.13794	0.975227	0.950374	0.976636	0.991229	0.947329	0.994455	0.0179354	17
158	314	0.906252	1.32543	0.799581	0.950742	0.922204	1.10827	0.959785	0.994108	1.01191	0.87043	1.10995	1.15137	1.07907	0.946973	0.99113	0.975409	0.964928	1.00397	0.0200213	17
159	316	0.967676	1.24235	0.801638	0.909912	0.931474	1.08981	0.957936	0.936955	1.04124	0.965861	1.00533	1.14584	1.02759	0.913936	0.986379	0.998869	0.987367	0.994715	0.0158383	17
160	318	0.926563	1.28402	0.758229	0.932247	0.919056	1.07156	0.992382	0.999881	0.998274	0.906502	1.02538	1.12066	1.06315	0.988001	0.968806	0.973256	0.963377	0.993608	0.0144903	17
161	320	1.00974	1.42154	0.794744	0.929398	0.907909	1.05897	0.987771	0.9781	1.01193	0.89676	1.0738	1.10038	0.826115	0.981336	0.957681	0.957555	0.942919	0.990391	0.0183283	17
162	322	0.980599	1.25636	0.819215	0.931396	0.90341	1.05864	1.00526	0.990754	0.983627	0.949535	0.920711	1.16926	0.905806	0.94261	0.954357	0.989023	0.963926	0.983794	0.0172894	17
163	324	0.972831	1.31376	0.782945	0.957448	0.924452	1.08921	0.996916	0.994789	1.00995	0.907914	1.03878	1.14026	1.00174	0.912589	0.976713	0.999759	0.98947	1.00056	0.0159244	17
164	326	0.949242	1.09675	0.803141	0.941402	0.9233	1.12086	0.982765	0.97736	1.00659	0.849578	1.02437	1.00194	0.949567	0.936224	1.00055	0.986768	0.973674	0.972005	0.0151116	17
165	328	0.965148	1.2913	0.78493	0.960003	0.910656	1.04976	1.00376	0.969282	1.0184	0.89325	0.973121	1.11587	0.998232	0.951306	0.986871	0.976345	0.984081	0.990136	0.0137304	17
166	330	0.974433	1.21451	0.776614	0.968572	0.876595	1.10418	0.990269	0.989256	1.02145	0.894213	1.06738	1.01953	0.972767	0.935178	1.01333	0.989924	0.90834	0.983326	0.0160952	17
167	332	0.93982	1.31393	0.79263	0.929101	0.911901	1.08598	1.01405	0.95031	1.02536	0.914299	1.10289	1.15317	0.903402	0.937516	0.989434	0.942207	0.917384	0.98961	0.0199985	17
168	334	1.00995	1.25809	0.776718	0.959183	0.901816	1.06828	0.99122	0.9911	0.998445	0.951689	1.13797	1.07273	0.955465	0.97644	0.984373	0.982644	0.93412	0.997073	0.0153908	17
169	336	0.955629	1.2597	0.801905	0.953584	0.907712	1.08459	0.972791	0.966259	0.974433	0.93795	1.06762	1.02312	1.04582	0.934786	0.979839	0.978338	0.94508	0.987597	0.0130738	17
170	338	0.977218	1.15406	0.804103	0.964949	0.884889	1.04352	0.973543	1.00203	1.00458	0.91201	0.96564	1.12052	0.913783	0.968281	0.95518	0.972449	0.977074	0.976108	0.014657	17
171	340	0.970184	1.29022	0.803354	0.992243	0.898128	1.10823	0.993998	0.996661	0.980583	0.938072	1.02981	1.12402	1.02454	0.973329	0.977092	0.959344	0.87306	0.996051	0.0173006	17
172	342	0.985499	1.34909	0.765854	0.966331	0.901721	1.11919	0.950394	1.0171	1.01763	0.877636	0.981444	1.11948	1.06649	0.979049	0.978684	1.03961	1.00747	1.00722	0.0176039	17
173	344	0.99411	1.27719	0.79721	0.95149	0.889521	1.14736	0.987393	0.981032	0.991236	0.930025	0.931224	1.106	0.903639	0.922394	0.989396	0.987449	0.938145	0.983812	0.018268	17
174	346	0.991843	1.27106	0.779113	0.980592	0.910935	1.0723	0.987743	1.02314	1.03449	0.923916	1.01729	1.16684	0.950771	0.981873	0.954332	0.974819	0.998977	1.00118	0.0163345	17
175	348	0.985118	1.40687	0.761545	0.953601	0.898607	1.10281	0.964418	1.01307	1.01179	0.915225	1.05295	1.0988	0.920465	0.948989	0.982176	0.981338	0.864606	0.991904	0.0179181	17
176	350	1.02463	1.2509	0.799813	0.955317	0.906041	1.09772	0.970118	1.00039	1.00236	0.87955	1.08706	1.13689	0.897802	0.941781	0.962881	0.973645	0.981668	0.992269	0.0190875	17
177	352	0.966545	1.29183	0.791915	0.948134	0.896785	1.11612	1.00529	1.0222	1.01086	1.00786	0.903836	1.05489	1.04762	0.954117	0.983572	0.944531	1.03016	0.998603	0.0149654	17
178	354	0.994784	1.20683	0.788533	0.957089	0.895896	1.09676	1.00574	1.01112	0.969087	0.896643	1.05725	1.08356	0.83296	1.01487	0.965954	0.983799	1.0113	0.986599	0.0184671	17
179	356	0.980913	1.27121	0.781795	0.951952	0.898256	1.11929	0.970493	0.969207	0.98137	0.905709	1.02384	1.10907	0.862792	0.95537	0.96338	0.965788	1.00966	0.983534	0.0179992	17
180	358	1.02601	1.20926	0.785507	0.946573	0.874729	1.03091	0.985592	0.994137	1.00072	0.91327	0.996195	1.14324	0.863251	0.954271	0.953056	0.980187	1.05768	0.983211	0.0180882	17
181	360	0.955024	1.22114	0.796041	0.966581	0.906852	1.07567	0.997613	0.978368	1.01887	0.908147	0.998464	1.18801	0.856324	0.945365	0.951916	0.950379	0.968426	0.981364	0.0202185	17
182	362	1.02533	1.22731	0.796336	0.961499	0.860456	1.09242	0.988303	0.997477	1.01315	0.919317	1.05524	1.09423	0.83449	0.920848	0.98459	0.979876	0.989209	0.984711	0.0192461	17
183	364	1.01334	1.27337	0.76542	0.981659	0.888278	1.10084	0.971567	1.02199	1.03563	0.912782	1.03952	1.12045	0.991682	0.951962	0.965595	1.01308	0.9711	1.00107	0.0161846	17
184	366	1.05047	1.40541	0.767648	0.969237	0.911081	1.02981	0.953844	1.0237	0.988216	0.929196	0.916961	1.07528	0.915848	0.954057	0.9669	0.947095	1.06889	0.992567	0.0138621	17
185	368	0.982529	1.31527	0.797346	0.961533	0.876411	1.08792	0.991401	0.967394	0.992682	0.904806	1.06448	1.08997	0.962451	0.947699	0.973503	0.973726	0.986912	0.992708	0.0154521	17
186	370	0.970233	1.27675	0.784296	0.980796	0.874029	1.06999	1.00154	0.99678	1.0221	0.943339	1.01315	1.14991	0.918663	0.924568	0.955058	0.97494	0.91189	0.986354	0.0178856	17
187	372	0.932182	1.35423	0.799588	0.949724	0.876332	1.08719	1.00259	0.995971	0.994381	1.01121	0.944166	1.11072	1.088	0.935192	0.999873	0.956962	0.956859	0.999716	0.0162673	17

## Sheet: Magnets3x Wt 28C
Depletion of cytosolic pool of prey
Magnets 3x Wt 28C
	Time (s)	Cell1	Cell2	Cell3	Cell4	Cell5	Cell6	Cell7	Cell8	Cell9	Cell10	Cell11	Cell12	Cell13	Average	ES	N
1	0	1	1	1	1	1	1	1	1	1	1	1	1	1	1	0	13
2	2	0.959745	0.923711	1.02961	1.01375	1.01533	0.972931	1.01409	0.983582	0.985879	1.00544	1.01869	1.00938	1.0579	0.999234	0.00945748	13
3	4	1.06028	0.933554	0.916075	1.05148	1.00949	1.03075	1.02486	0.992729	0.974395	1.02171	1.02717	1.01454	1.06653	1.0095	0.0126025	13
4	6	0.965393	0.936531	0.993232	1.01469	1.01311	1.04123	1.01176	1.00201	0.979957	1.02303	1.02843	1.01378	1.07611	1.00764	0.00962987	13
5	8	0.978024	0.940904	1.01594	1.0154	1.02892	0.993585	1.02655	1.00463	0.95166	1.04874	1.00534	1.0186	1.17357	1.01553	0.0156383	13
6	10	1.09943	0.858834	1.03045	1.01117	1.00193	1.06569	1.02328	1.01537	0.99467	1.0286	1.03123	1.02089	1.13493	1.02434	0.0176728	13
7	12	0.730739	0.710605	0.542287	0.955836	0.842483	0.84405	0.980089	0.776354	0.90902	0.844407	0.983082	0.946829	1.03646	0.854018	0.0381579	13
8	14	0.651064	0.712195	0.382093	0.874403	0.845482	0.806055	0.933581	0.694981	0.860362	0.764014	0.937392	0.929487	1.02315	0.801097	0.0460918	13
9	16	0.5527	0.655645	0.233741	0.804205	0.848482	0.786009	0.919448	0.664537	0.861706	0.743144	0.896037	0.912145	0.93512	0.75484	0.0542083	13
10	18	0.580544	0.606677	0.224488	0.792266	0.826943	0.785964	0.905316	0.634093	0.86305	0.722274	0.868699	0.922535	0.96333	0.74586	0.0551613	13
11	20	0.426501	0.572078	0.244042	0.758068	0.827154	0.775918	0.891183	0.643649	0.864393	0.701404	0.851361	0.914436	0.96154	0.725518	0.0577323	13
12	22	0.482959	0.586386	0.264743	0.757963	0.821372	0.775737	0.912419	0.652212	0.834262	0.711441	0.864023	0.904196	0.982318	0.734618	0.0549812	13
13	24	0.453225	0.582009	0.249447	0.717797	0.815589	0.76898	0.891212	0.650776	0.825113	0.721477	0.876686	0.895383	0.933096	0.721599	0.0548316	13
14	26	0.442081	0.606835	0.23416	0.738504	0.817741	0.772104	0.908848	0.650263	0.830089	0.727069	0.870117	0.911165	0.921522	0.725423	0.0560849	13
15	28	0.436358	0.654565	0.184885	0.73659	0.819894	0.755343	0.908862	0.643827	0.825649	0.707106	0.856369	0.901638	0.909948	0.718541	0.0579028	13
16	30	0.456072	0.570065	0.196509	0.710947	0.82197	0.742037	0.911581	0.63504	0.826884	0.705709	0.846929	0.906706	0.913799	0.711096	0.0577458	13
17	32	0.390191	0.617288	0.24551	0.703751	0.824047	0.735219	0.914913	0.626254	0.824336	0.711934	0.83749	0.902533	0.902225	0.710438	0.0561966	13
18	34	0.395036	0.583926	0.253422	0.683831	0.809245	0.79934	0.893407	0.636678	0.822103	0.722296	0.834292	0.894837	0.907808	0.710478	0.055617	13
19	36	0.406902	0.625825	0.227675	0.69203	0.794443	0.764954	0.900073	0.634295	0.819659	0.722658	0.826933	0.895284	0.901953	0.708668	0.055524	13
20	38	0.354884	0.590612	0.219743	0.66915	0.773766	0.795492	0.892846	0.637798	0.818511	0.721248	0.813431	0.895295	0.913986	0.699751	0.0582644	13
21	40	0.430467	0.614728	0.203843	0.677723	0.753089	0.761416	0.892396	0.637377	0.815872	0.72661	0.808549	0.891671	0.91385	0.702122	0.055611	13
22	42	0.319506	0.619181	0.267788	0.679025	0.772484	0.720144	0.893427	0.638622	0.842059	0.713542	0.800667	0.889175	0.91028	0.697377	0.0563761	13
23	44	0.341504	0.617974	0.233721	0.662923	0.791878	0.738726	0.893471	0.640163	0.827776	0.700474	0.792966	0.887171	0.914628	0.695644	0.0572227	13
24	46	0.395246	0.565639	0.235327	0.66963	0.781728	0.732057	0.886596	0.635158	0.854846	0.732165	0.798344	0.885403	0.948206	0.701565	0.0569037	13
25	48	0.365121	0.599974	0.218029	0.696072	0.771577	0.720712	0.884197	0.637075	0.852779	0.719096	0.795003	0.883018	0.948595	0.699327	0.0580628	13
26	50	0.358021	0.647971	0.206209	0.664776	0.764191	0.762166	0.892098	0.641842	0.851069	0.696348	0.799975	0.882885	0.940644	0.70063	0.0586809	13
27	52	0.33919	0.619133	0.216465	0.676537	0.756805	0.739082	0.88708	0.639641	0.864255	0.680053	0.799405	0.879685	0.940879	0.695247	0.0589301	13
28	54	0.345773	0.616545	0.227677	0.668503	0.755626	0.756049	0.894097	0.642465	0.875356	0.719592	0.786003	0.87999	0.903826	0.697808	0.057521	13
29	56	0.36035	0.637438	0.190345	0.656559	0.754448	0.761919	0.889385	0.64439	0.866744	0.721909	0.79184	0.876588	0.933735	0.698896	0.0593332	13
30	58	0.331668	0.649616	0.231178	0.668781	0.758128	0.763068	0.882075	0.61293	0.843276	0.735485	0.786025	0.889887	0.933328	0.69888	0.0581077	13
31	60	0.378487	0.612445	0.209508	0.658687	0.758569	0.752054	0.885844	0.615304	0.829713	0.741555	0.782243	0.878302	0.923131	0.694296	0.0570452	13
32	62	0.335376	0.659506	0.247238	0.653759	0.746395	0.730365	0.880518	0.637455	0.836782	0.726915	0.757758	0.888021	0.905647	0.692749	0.0555292	13
33	64	0.312481	0.650468	0.246828	0.667444	0.73422	0.715793	0.883784	0.618778	0.81612	0.736739	0.752959	0.882218	0.893022	0.68545	0.0558266	13
34	66	0.332829	0.59723	0.198016	0.661885	0.755801	0.775167	0.875049	0.636399	0.870341	0.736329	0.77582	0.877359	0.918933	0.693166	0.0597609	13
35	68	0.355279	0.595952	0.193176	0.656074	0.754879	0.743671	0.878566	0.627517	0.863545	0.742741	0.760242	0.879317	0.919153	0.690009	0.0589222	13
36	70	0.29022	0.604973	0.228075	0.668035	0.73478	0.71658	0.883346	0.644545	0.865816	0.731339	0.760141	0.877824	0.895928	0.684739	0.0587223	13
37	72	0.342392	0.598869	0.21624	0.696368	0.739953	0.738492	0.881968	0.689745	0.894769	0.784731	0.757021	0.883176	0.956776	0.706192	0.0596892	13
38	74	0.339155	0.616073	0.24988	0.664705	0.767941	0.75884	0.892585	0.703691	0.895879	0.794008	0.75387	0.87731	0.961285	0.713479	0.0584929	13
39	76	0.314229	0.613076	0.264076	0.694426	0.79389	0.787815	0.885719	0.718317	0.937691	0.812762	0.767608	0.895652	1.00217	0.729803	0.0614783	13
40	78	0.397766	0.640126	0.223833	0.686785	0.810591	0.839103	0.899655	0.729011	0.919697	0.826935	0.795232	0.893245	1.01898	0.744689	0.0610117	13
41	80	0.284895	0.631136	0.219812	0.689575	0.820569	0.867313	0.910753	0.772892	0.925674	0.885835	0.807884	0.897617	1.02996	0.749532	0.0676122	13
42	82	0.34372	0.624989	0.24167	0.679314	0.824052	0.946061	0.920607	0.800484	0.944532	0.91483	0.809459	0.902108	1.0488	0.769279	0.066785	13
43	84	0.328066	0.682728	0.331308	0.703169	0.831316	0.863721	0.927777	0.81438	0.962536	0.910845	0.822845	0.912136	1.08871	0.783041	0.062967	13
44	86	0.341007	0.681739	0.375446	0.726943	0.851282	0.93565	0.925571	0.811857	0.98271	0.934748	0.817748	0.908753	1.0261	0.793812	0.0599941	13
45	88	0.3734	0.637853	0.361514	0.731567	0.863873	0.916889	0.934317	0.83452	0.977093	0.969719	0.839825	0.919795	1.06724	0.802123	0.0614811	13
46	90	0.364224	0.721175	0.420082	0.751696	0.865317	0.885035	0.940191	0.855237	0.988611	0.955481	0.856915	0.919168	1.04162	0.812673	0.0572034	13
47	92	0.418599	0.705777	0.41789	0.747643	0.888266	0.907417	0.94513	0.878858	0.999198	0.988311	0.857541	0.929764	1.02612	0.823886	0.055971	13
48	94	0.393044	0.682252	0.487308	0.766885	0.890455	0.946579	0.956017	0.879103	0.991323	0.997134	0.874427	0.931125	1.07436	0.836155	0.0563356	13
49	96	0.438752	0.714216	0.460854	0.752761	0.895851	0.955462	0.959229	0.909999	1.00074	1.02505	0.894375	0.935284	1.09569	0.849097	0.0566233	13
50	98	0.445882	0.729238	0.525104	0.756781	0.896409	0.936709	0.965894	0.909967	0.992599	1.02866	0.908874	0.938296	1.06821	0.854048	0.052487	13
51	100	0.44937	0.730336	0.508646	0.773029	0.892512	0.919247	0.966004	0.932103	1.00644	1.04739	0.913533	0.950599	1.11361	0.861755	0.0548515	13
52	102	0.42575	0.724137	0.451631	0.754035	0.908461	0.914581	0.965045	0.918641	1.04548	1.04227	0.930054	0.939348	1.04343	0.85099	0.0575265	13
53	104	0.413974	0.729379	0.502724	0.758194	0.902973	0.893565	0.969116	0.9265	0.998653	1.05349	0.9285	0.942788	1.0637	0.852581	0.0556028	13
54	106	0.488882	0.715598	0.497488	0.798675	0.91043	0.925154	0.966551	0.961729	1.06773	1.05425	0.944237	0.943069	1.08982	0.874124	0.0547343	13
55	108	0.441278	0.7514	0.495997	0.799368	0.915745	0.948097	0.979369	0.958151	1.01858	1.0829	0.939904	0.953847	1.09665	0.875484	0.0566682	13
56	110	0.469283	0.739302	0.443294	0.796752	0.939043	0.86584	0.966735	0.922004	1.04906	1.05158	0.959126	0.945892	1.09457	0.864807	0.0572201	13
57	112	0.490172	0.780774	0.535872	0.822196	0.924573	0.897148	0.981453	0.954044	1.04674	1.08422	0.96084	0.953691	1.07881	0.885426	0.0520263	13
58	114	0.444555	0.769578	0.533899	0.801484	0.937777	0.909879	0.9816	0.969123	1.03201	1.07043	0.967367	0.958264	1.06279	0.879905	0.0541127	13
59	116	0.493697	0.770225	0.499728	0.812435	0.941463	0.944104	0.998107	0.969205	1.0297	1.1056	0.95971	0.965186	1.07961	0.889905	0.0546391	13
60	118	0.490533	0.709662	0.592168	0.810017	0.93592	0.915209	0.977442	0.996522	1.04278	1.11857	0.974499	0.965749	1.09023	0.893792	0.0529454	13
61	120	0.514614	0.723018	0.527917	0.812572	0.947697	0.928807	0.973055	0.983959	1.03064	1.11374	0.980397	0.95251	1.085	0.890303	0.0534935	13
62	122	0.486526	0.77214	0.671855	0.828127	0.951308	0.922641	0.967602	0.962004	1.01542	1.1067	0.987251	0.95051	1.1132	0.902714	0.0485464	13
63	124	0.542817	0.772181	0.523	0.833843	0.948574	0.870447	0.977351	0.968713	1.04341	1.07103	0.976198	0.963631	1.08254	0.890288	0.0503915	13
64	126	0.509153	0.724076	0.582007	0.852775	0.94935	0.944449	0.979779	0.999987	1.03493	1.11993	0.97695	0.965431	1.1383	0.905932	0.0531651	13
65	128	0.520713	0.784545	0.590725	0.843668	0.940162	0.959504	0.974793	0.982438	1.04384	1.10824	0.981551	0.954985	1.09177	0.905918	0.0495884	13
66	130	0.478868	0.740601	0.634808	0.869732	0.952524	0.935401	0.966861	1.02389	1.04131	1.14385	0.990082	0.956717	1.07488	0.908425	0.0517798	13
67	132	0.518852	0.784141	0.578113	0.858239	0.964394	0.943958	0.971122	1.00092	1.04207	1.12396	0.998564	0.953721	1.09851	0.910504	0.0510333	13
68	134	0.568423	0.732509	0.589755	0.829671	0.951161	0.962223	0.985148	1.01327	1.03273	1.14767	0.991642	0.951255	1.09566	0.911624	0.0501453	13
69	136	0.50838	0.767384	0.573765	0.872228	0.946051	0.972765	0.988712	1.0088	1.05534	1.13423	1.0001	0.962645	1.13267	0.91716	0.0536204	13
70	138	0.541146	0.778107	0.562567	0.853607	0.957907	0.977973	0.980881	1.00868	1.03594	1.16073	1.00246	0.958896	1.13597	0.919604	0.0530206	13
71	140	0.52725	0.780408	0.544763	0.880202	0.958877	0.952604	0.997409	1.00355	1.00934	1.14193	1.00277	0.966077	1.14413	0.916102	0.0535844	13
72	142	0.562571	0.764071	0.640816	0.88848	0.968991	0.910972	0.996166	1.03246	1.03609	1.14037	1.00649	0.960558	1.16632	0.928796	0.0495343	13
73	144	0.513234	0.815896	0.616104	0.916017	0.948725	0.955456	0.990585	0.984598	1.05113	1.12599	1.02546	0.954258	1.14687	0.926486	0.0508105	13
74	146	0.548259	0.762865	0.533408	0.88691	0.933142	1.00093	0.991849	0.977618	1.06926	1.12598	1.00996	0.960097	1.11466	0.916534	0.0531555	13
75	148	0.530555	0.756789	0.675894	0.851791	0.951867	0.96561	0.979239	0.990465	1.03975	1.13996	1.00167	0.957271	1.0705	0.916259	0.0471881	13
76	150	0.496672	0.775329	0.611417	0.883216	0.934699	0.977111	0.98451	0.978007	1.06131	1.15344	1.00117	0.957188	1.07836	0.914802	0.05157	13
77	152	0.476455	0.764909	0.60249	0.870182	0.938915	0.94836	0.990956	1.02643	1.06186	1.17106	1.01866	0.951535	1.15381	0.921201	0.0560526	13
78	154	0.53474	0.804441	0.574673	0.877694	0.942655	0.998328	0.989571	0.995071	1.0713	1.16225	1.00433	0.95731	1.1198	0.925552	0.0524738	13
79	156	0.513538	0.808202	0.634692	0.886317	0.948385	0.987721	0.986011	1.01041	1.05639	1.16162	1.0209	0.955984	1.14046	0.931587	0.0514834	13
80	158	0.520142	0.824671	0.577271	0.875307	0.939145	1.01984	0.981049	1.02883	1.05218	1.19121	1.01555	0.958356	1.15745	0.933923	0.0548793	13
81	160	0.543855	0.81339	0.577778	0.867201	0.944465	1.03421	0.989826	0.999959	1.02963	1.12016	1.01005	0.94479	1.13597	0.923945	0.0509471	13
82	162	0.516284	0.820915	0.632056	0.857446	0.949195	0.97087	0.999666	1.03305	1.03009	1.18081	1.03525	0.954359	1.13795	0.932149	0.0520344	13
83	164	0.544423	0.846812	0.58031	0.903497	0.940102	1.0283	0.988489	0.98929	1.04042	1.16291	1.02952	0.962038	1.14304	0.935319	0.051743	13
84	166	0.54917	0.780585	0.626372	0.875591	0.958165	0.965977	0.994692	1.01489	1.03588	1.15649	1.02388	0.956923	1.13144	0.928465	0.0499087	13
85	168	0.504411	0.834456	0.573474	0.891179	0.963359	1.00819	0.996149	1.04388	1.01543	1.19694	1.02368	0.950939	1.09852	0.930816	0.0542788	13
86	170	0.531016	0.796992	0.580472	0.864369	0.971423	0.980693	0.988944	1.02732	0.99553	1.17722	1.02122	0.942237	1.10459	0.921694	0.0521372	13
87	172	0.579389	0.782479	0.59044	0.873155	0.972177	0.972625	0.990427	1.0373	1.01021	1.16348	1.02222	0.961275	1.07818	0.925643	0.0489716	13
88	174	0.564982	0.782565	0.553903	0.894853	0.96622	0.987667	0.988464	1.02494	1.02359	1.17537	1.02488	0.958188	1.11809	0.927977	0.052429	13
89	176	0.514427	0.847342	0.654798	0.871874	0.972348	0.953872	0.976321	1.0169	1.008	1.13593	1.02338	0.961878	1.11975	0.927448	0.0483615	13
90	178	0.544652	0.842697	0.638239	0.863549	0.957641	1.05383	0.988333	1.04584	0.987164	1.19042	1.01665	0.955153	1.10511	0.937636	0.0498527	13
91	180	0.538587	0.83821	0.623651	0.891345	0.975144	1.03909	0.990703	1.05322	0.989546	1.2001	0.996759	0.953847	1.11301	0.938709	0.0508778	13
92	182	0.552167	0.850208	0.603201	0.860563	0.988139	1.01516	0.986686	1.07144	1.03772	1.1773	0.992987	0.941934	1.08655	0.935697	0.0503546	13
93	184	0.547777	0.834431	0.558424	0.868537	0.980045	1.01132	0.985253	1.05439	1.0173	1.1939	1.01553	0.950741	1.13292	0.93466	0.0537458	13
94	186	0.553609	0.809025	0.566664	0.879082	0.979807	1.00861	0.99272	1.04954	1.0156	1.201	1.00353	0.955316	1.09643	0.931611	0.0526403	13
95	188	0.49878	0.84575	0.597926	0.867944	0.977202	1.00755	0.991337	1.08766	1.05033	1.18505	1.00705	0.976164	1.15533	0.94216	0.0554979	13
96	190	0.524806	0.829706	0.648144	0.8905	0.979744	0.974818	0.98864	1.09056	1.02899	1.21349	1.01766	0.963007	1.12959	0.944589	0.0521926	13
97	192	0.536879	0.83652	0.638984	0.879154	0.966319	1.00929	0.986397	1.08512	1.0006	1.221	1.00336	0.96145	1.18542	0.946961	0.0532857	13
98	194	0.548646	0.850041	0.544996	0.884732	0.969712	1.01353	0.981296	1.08836	1.04798	1.22621	1.01079	0.971605	1.14692	0.944986	0.0561828	13
99	196	0.496728	0.883495	0.556811	0.882658	0.970358	0.980998	0.994316	1.10267	1.03581	1.21624	0.999705	0.966009	1.15855	0.941873	0.0576945	13
100	198	0.558253	0.873643	0.611134	0.8702	0.969346	1.03139	0.980589	1.08267	1.04083	1.18978	0.999353	0.966133	1.12194	0.945789	0.0508772	13
101	200	0.538924	0.855476	0.656113	0.863787	0.970157	1.04057	0.991552	1.05958	1.00614	1.2036	0.998873	0.961823	1.10531	0.942454	0.0498356	13
102	202	0.535341	0.901156	0.69088	0.853291	0.949262	1.0204	1.00515	1.09482	1.0183	1.25124	1.01103	0.969456	1.16224	0.958659	0.0520959	13
103	204	0.591164	0.861749	0.668421	0.87101	0.965259	1.00856	0.987327	1.09404	0.991448	1.23807	1.00646	0.966024	1.18682	0.956643	0.0500987	13
104	206	0.573117	0.883725	0.683754	0.864279	0.95405	0.946233	0.992538	1.09883	1.00762	1.22608	1.0014	0.97508	1.15161	0.95064	0.04884	13
105	208	0.547955	0.911625	0.592543	0.872157	0.960106	1.06697	0.982919	1.08567	0.991857	1.20042	1.01346	0.964252	1.18962	0.952273	0.0540812	13
106	210	0.515386	0.897659	0.621117	0.867709	0.959434	1.03196	0.99905	1.08404	1.01296	1.21786	1.01627	0.968364	1.16513	0.950535	0.0543295	13
107	212	0.530963	0.906349	0.574711	0.8817	0.988819	1.00326	0.998989	1.10542	1.02064	1.24636	1.02237	0.961984	1.17255	0.954931	0.0566882	13
108	214	0.564782	0.889527	0.563417	0.846354	0.96929	1.05692	1.00227	1.11366	0.993519	1.25819	1.00411	0.960768	1.11688	0.949206	0.055546	13
109	216	0.581132	0.912342	0.590329	0.871577	0.973185	0.975736	0.999736	1.10246	1.01964	1.23052	0.999954	0.964596	1.15188	0.951777	0.0523108	13
110	218	0.568382	0.897845	0.633115	0.874705	0.960306	1.01106	0.99822	1.1074	1.01663	1.22887	0.997252	0.964436	1.159	0.955171	0.0514754	13
111	220	0.553516	0.898792	0.628435	0.904719	0.962804	1.04052	0.997172	1.10969	0.999359	1.23984	1.01024	0.976484	1.14952	0.959314	0.0525511	13
112	222	0.592609	0.912884	0.596589	0.903989	0.963264	1.12464	0.993719	1.09675	1.01818	1.24225	1.03109	0.970154	1.18726	0.971798	0.0541483	13
113	224	0.59375	0.897407	0.617806	0.880766	0.985298	1.08263	0.986613	1.09375	0.998753	1.22455	1.03069	0.967104	1.13344	0.960966	0.050783	13
114	226	0.585822	0.877213	0.648714	0.903663	0.962625	1.00092	0.991394	1.07638	0.989009	1.25697	1.03931	0.973744	1.14098	0.957442	0.0500853	13
115	228	0.616114	0.930237	0.636914	0.878179	0.981647	1.01321	0.995501	1.14813	0.981167	1.25811	1.05374	0.969051	1.205	0.974384	0.0522382	13
116	230	0.605632	0.910247	0.6133	0.912098	0.966939	0.985035	0.987044	1.10247	1.01292	1.26103	1.04452	0.976678	1.14776	0.963514	0.0511525	13
117	232	0.65439	0.913907	0.616644	0.870307	0.955615	1.02895	0.993535	1.11201	1.00655	1.2353	1.05202	0.973694	1.17376	0.968206	0.0494778	13
118	234	0.580985	0.926714	0.626352	0.876433	0.990299	1.08799	0.997157	1.13401	1.01433	1.24746	1.04185	0.965041	1.11356	0.969399	0.0523036	13
119	236	0.556979	0.904444	0.630625	0.873884	0.972162	1.01942	0.982053	1.13699	1.01935	1.23455	1.03023	0.980858	1.11977	0.958563	0.0522982	13
120	238	0.574133	0.902611	0.59591	0.869913	0.95938	1.00435	0.991269	1.11722	1.00475	1.26615	1.04409	0.97233	1.15703	0.958395	0.0544359	13
121	240	0.562388	0.901498	0.538044	0.882136	0.968148	1.0065	0.990611	1.13161	0.982176	1.28099	1.03127	0.979872	1.16878	0.955694	0.05832	13
122	242	0.596938	0.939481	0.61439	0.891568	0.977142	1.03951	0.98864	1.06977	1.03212	1.22336	1.04055	0.979843	1.1788	0.967086	0.0509218	13
123	244	0.61866	0.905849	0.655248	0.884395	0.968255	1.0153	0.993858	1.11517	1.05101	1.25769	1.03317	0.965783	1.16252	0.9713	0.0498735	13
124	246	0.59228	0.922931	0.605778	0.850327	0.979655	1.04892	1.00763	1.13647	1.02498	1.28174	1.04059	0.969576	1.18341	0.972638	0.055352	13
125	248	0.572891	0.974448	0.630181	0.863556	0.970732	0.984624	1.00739	1.10053	1.02728	1.23638	1.0359	0.969694	1.17794	0.965504	0.0521792	13
126	250	0.61438	0.946284	0.665821	0.853668	0.970556	0.944989	1.00319	1.08628	0.997797	1.23209	1.02509	0.97108	1.13222	0.957188	0.0470278	13
127	252	0.56846	0.977045	0.629619	0.856094	0.952103	1.00873	0.990063	1.14424	1.02112	1.22623	1.01349	0.974175	1.13555	0.961301	0.051844	13
128	254	0.57602	0.918586	0.682306	0.857782	0.958172	1.01236	1.00528	1.09928	1.01245	1.25538	1.03596	0.966895	1.18471	0.966552	0.051057	13
129	256	0.62571	0.930012	0.656359	0.837147	0.969154	1.00037	0.994325	1.1354	1.0017	1.24746	1.0409	0.973815	1.12842	0.964675	0.0488843	13
130	258	0.5593	0.962698	0.638268	0.870899	0.956957	1.00946	0.989375	1.14151	1.00256	1.268	1.04049	0.977515	1.15522	0.967097	0.053661	13
131	260	0.583565	0.970342	0.57479	0.853944	0.949497	1.04974	0.986917	1.12585	1.04385	1.23717	1.05122	0.966933	1.09416	0.960614	0.0535927	13
132	262	0.534436	1.02676	0.665413	0.856507	0.946798	0.997581	0.99281	1.09659	1.04305	1.22971	1.05196	0.970499	1.16903	0.96778	0.0528355	13
133	264	0.555039	0.99238	0.607175	0.856452	0.96196	1.08212	0.995928	1.14863	0.988168	1.25545	1.04463	0.971229	1.19238	0.973195	0.0565654	13
134	266	0.568694	0.954605	0.592216	0.860059	0.958199	1.01655	0.993657	1.14891	1.03562	1.30181	1.0592	0.97113	1.16697	0.971355	0.057295	13
135	268	0.591649	0.984922	0.598081	0.851436	0.946063	1.0267	0.979764	1.13943	1.01284	1.27866	1.07279	0.961769	1.1415	0.968123	0.0546228	13
136	270	0.596757	0.987667	0.589029	0.824419	0.961642	0.997073	0.984734	1.12614	1.03451	1.26037	1.09134	0.968244	1.17275	0.968822	0.0552181	13
137	272	0.567676	0.972378	0.565647	0.822291	0.969578	1.04525	0.990228	1.13276	1.03484	1.26965	1.08384	0.97249	1.092	0.962971	0.0566676	13
138	274	0.580425	0.905573	0.621444	0.874304	0.968702	1.02401	0.991659	1.12144	1.03146	1.27231	1.09502	0.973557	1.11087	0.966983	0.053315	13
139	276	0.548276	0.993377	0.629236	0.829063	0.956716	1.06397	0.992498	1.15745	1.02798	1.26949	1.0935	0.95507	1.11408	0.971593	0.0559468	13
140	278	0.570868	0.959734	0.631437	0.849302	0.952559	1.01034	1.00295	1.10514	0.995395	1.27797	1.10556	0.959046	1.11544	0.964287	0.0533853	13
141	280	0.544803	0.966135	0.701845	0.823975	0.949004	0.944994	1.00578	1.11614	1.03638	1.25075	1.11587	0.965241	1.11124	0.964012	0.0519956	13
142	282	0.535457	1.02155	0.632242	0.823906	0.96343	0.949496	0.995324	1.06017	1.01514	1.22729	1.12795	0.964209	1.12787	0.957234	0.0538379	13
143	284	0.569034	1.01637	0.6136	0.844019	0.96244	1.06451	0.994357	1.14305	0.999751	1.23955	1.14413	0.974986	1.13906	0.977296	0.0553033	13
144	286	0.557963	1.02609	0.674102	0.826114	0.94685	0.967564	0.995034	1.13017	0.99336	1.25464	1.13758	0.962272	1.1886	0.973872	0.0546142	13
145	288	0.570239	0.989072	0.584451	0.847311	0.953931	0.965953	0.996543	1.13235	0.977534	1.24728	1.15559	0.965796	1.1816	0.966743	0.0570229	13
146	290	0.591078	1.05741	0.640414	0.849186	0.958866	0.999571	1.00433	1.15092	0.972412	1.26511	1.1485	0.971231	1.1237	0.979441	0.0537551	13
147	292	0.576857	1.01566	0.617467	0.855416	0.953392	0.949705	0.99276	1.11979	0.970811	1.27112	1.14225	0.970104	1.13311	0.966803	0.0545679	13
148	294	0.602795	0.982554	0.711001	0.858801	0.967574	0.955899	0.987628	1.12925	1.00614	1.25996	1.13918	0.977212	1.14582	0.978755	0.0496327	13
149	296	0.583409	1.01954	0.593017	0.826589	0.965188	1.01303	0.988897	1.09622	0.950287	1.2506	1.16137	0.964049	1.16703	0.967633	0.0558894	13
150	298	0.59333	1.01098	0.630491	0.813937	0.976785	0.911972	0.988679	1.10154	0.951244	1.27076	1.16239	0.979389	1.17633	0.966756	0.0551567	13
151	300	0.652693	1.05481	0.628373	0.856225	0.960042	0.954443	0.983839	1.11046	1.02347	1.24723	1.15926	0.96999	1.11191	0.977902	0.0501695	13
152	302	0.575703	1.05099	0.592464	0.850992	0.957916	0.963607	0.983919	1.07329	1.01807	1.22115	1.16523	0.981626	1.14546	0.967725	0.0545455	13
153	304	0.587914	1.01081	0.534232	0.865992	0.961901	1.00507	0.982758	1.10736	0.991299	1.25797	1.17679	0.987878	1.16817	0.972165	0.0585271	13
154	306	0.550127	1.03138	0.635238	0.834386	0.961699	1.01529	0.994988	1.08245	1.02509	1.2575	1.17677	0.985036	1.17198	0.97861	0.0562964	13
155	308	0.550582	1.02533	0.568352	0.806988	0.965851	1.01524	0.986974	1.10192	0.996222	1.32192	1.15132	0.98573	1.16301	0.972264	0.0610519	13
156	310	0.576035	0.980908	0.62988	0.841558	0.95937	0.981022	0.983771	1.12728	0.995739	1.27507	1.16396	0.985648	1.13411	0.971873	0.0549562	13
157	312	0.594849	1.04792	0.636775	0.839225	0.969688	1.04381	0.989756	1.0997	0.98933	1.29286	1.19071	0.981109	1.1327	0.985264	0.0551513	13
158	314	0.544122	1.00485	0.626339	0.839876	0.963947	1.05896	0.975109	1.09957	0.981812	1.28453	1.177	0.987556	1.13982	0.975654	0.0573473	13
159	316	0.573751	1.05415	0.69044	0.849952	0.974128	1.01273	0.974177	1.13583	0.966678	1.29355	1.17643	0.982123	1.16762	0.988582	0.0547748	13
160	318	0.525537	1.02922	0.647568	0.834086	0.958615	1.02765	0.97983	1.11281	0.970285	1.28397	1.18478	0.990574	1.12452	0.974573	0.0575219	13
161	320	0.557217	0.983403	0.700342	0.849958	0.970161	1.03787	0.98507	1.15467	0.970415	1.28639	1.18498	0.978783	1.16803	0.986714	0.0553896	13
162	322	0.583895	1.03871	0.573347	0.820249	0.974288	1.01405	0.98327	1.12179	0.978066	1.29155	1.19752	0.991837	1.15566	0.978787	0.0592636	13
163	324	0.596733	1.05429	0.626228	0.83426	0.969415	1.0627	0.979383	1.10008	0.948903	1.26757	1.18987	0.978569	1.17551	0.983347	0.0558138	13
164	326	0.605156	1.01938	0.59853	0.811445	0.965392	1.04907	0.976365	1.10868	0.985177	1.32387	1.20392	0.981189	1.15892	0.983623	0.0587151	13
165	328	0.562032	1.04931	0.624392	0.853359	0.960866	1.09906	0.979588	1.12326	0.947383	1.27891	1.21373	0.991795	1.16975	0.988726	0.0586853	13
166	330	0.619728	1.01361	0.58748	0.821772	0.955326	1.05571	0.980478	1.11138	0.990314	1.28553	1.22893	0.991386	1.13635	0.982922	0.057374	13
167	332	0.540467	1.02925	0.597669	0.832403	0.956657	0.974755	0.974549	1.09429	0.948131	1.25608	1.2063	0.98415	1.16769	0.966338	0.0587534	13
168	334	0.59284	0.993617	0.657459	0.868927	0.974138	1.00692	0.978832	1.08329	0.973994	1.26954	1.19926	0.968675	1.171	0.979885	0.0534953	13
169	336	0.586802	1.08294	0.666495	0.82186	0.967662	1.00518	0.970874	1.1113	0.993952	1.26983	1.21764	0.973313	1.20586	0.990285	0.0564413	13
170	338	0.623633	1.02372	0.598043	0.826192	0.991729	1.01535	0.979207	1.08579	0.999066	1.28942	1.21862	0.98355	1.2122	0.988193	0.0575756	13
171	340	0.635356	1.02646	0.548131	0.808366	0.969093	1.04707	0.977586	1.10868	0.938207	1.28836	1.18592	0.975458	1.1199	0.97143	0.0575104	13
172	342	0.578382	0.970669	0.559833	0.826473	0.952995	1.03797	0.978029	1.11201	0.999208	1.26762	1.19196	0.988877	1.14837	0.970184	0.0587373	13
173	344	0.559378	1.02655	0.650814	0.819907	0.962933	1.0096	0.972675	1.11503	0.996914	1.28977	1.19982	0.985411	1.2	0.983754	0.0580311	13
174	346	0.615669	1.01745	0.603961	0.803525	0.966385	0.970762	0.975793	1.11095	1.00396	1.28081	1.22012	0.982802	1.21812	0.982331	0.058259	13
175	348	0.602158	1.03257	0.64739	0.824691	0.970107	1.07534	0.978376	1.12362	0.975451	1.30881	1.20479	0.977692	1.143	0.989538	0.056282	13
176	350	0.570934	1.0243	0.5971	0.837692	0.958674	0.977111	0.972995	1.11228	0.955012	1.27724	1.21841	0.979889	1.14178	0.971032	0.0580182	13
177	352	0.621025	1.04267	0.617697	0.853733	0.959298	1.0602	0.974618	1.14454	0.944246	1.32054	1.20947	0.987854	1.15619	0.991698	0.0573554	13
178	354	0.536145	1.03033	0.567556	0.829344	0.963827	1.039	0.988867	1.13509	0.965813	1.28724	1.20055	0.994813	1.15569	0.976481	0.0617264	13
179	356	0.580904	1.06249	0.641604	0.819638	0.957324	1.00179	0.987192	1.12977	0.967549	1.26979	1.19845	0.983472	1.16003	0.981538	0.0562744	13
180	358	0.566846	1.02965	0.569479	0.842987	0.964447	1.05125	0.995327	1.08285	0.965843	1.21933	1.19208	0.98851	1.15831	0.971302	0.0571736	13
181	360	0.577878	1.07139	0.649944	0.823555	0.966588	1.07356	0.984721	1.07422	0.956805	1.24948	1.19398	0.993254	1.19224	0.985201	0.0557648	13
182	362	0.598771	1.09462	0.64512	0.82928	0.942566	1.06548	0.98128	1.10752	0.95173	1.26864	1.16544	0.999303	1.20775	0.989039	0.0559297	13
183	364	0.578135	1.07905	0.600936	0.841414	0.949126	1.05604	0.993054	1.10318	0.969684	1.29441	1.19228	0.988158	1.17402	0.986114	0.0586999	13
184	366	0.597656	1.04433	0.595075	0.796633	0.942525	1.03711	0.984165	1.07445	0.959822	1.25629	1.17664	0.975375	1.16196	0.969387	0.0562047	13
185	368	0.558691	1.00988	0.651697	0.831364	0.963143	1.14919	0.972889	1.05988	0.941695	1.27363	1.17535	0.992483	1.20084	0.983134	0.0576381	13
186	370	0.595216	1.00725	0.607326	0.811094	0.970752	1.05863	0.982591	1.11012	0.976369	1.28357	1.17778	0.979624	1.18521	0.980425	0.0573348	13
187	372	0.61929	1.03655	0.653173	0.820322	0.957033	1.16968	0.983519	1.11129	0.971994	1.28368	1.15834	0.996563	1.17817	0.995355	0.0554672	13

## Sheet: Prey accumulation on mito
Prey accumulation on mitochondria
(ft-f0)/f0
Original Magnets 37C	Original Magnets 28C	Original Magnets(3x) 28C	eMags 37C	eMagsF 37C
-0.0456815	1.13528	1.91472	1.34982	1.63471
-0.0060244	1.10196	1.4981	1.40911	2.82431
0.014895	0.694687	2.18751	1.1296	1.61825
0.0107549	0.178406	2.6721	1.41708	2.19453
-0.0220106	0.964685	2.07969	3.11731	1.45511
-0.0602843	0.840586	1.38082	1.65429	1.55569
0.0691646	0.159735	1.97372	1.65699	1.62973
0.0679794	0.228599	2.01938	3.48469	2.13947
-0.0193574	0.993647	2.7823	3.3118	2.80647
-0.0185633	0.175293	2.35894	2.13951	2.65425
0.018852	0.631026	1.71107	2.82668	2.08399
0.00042423	0.788994	2.85035	3.06478	1.92313
	0.482422	1.4734	3.33882	2.00498
	0.217693		3.82541
	0.0449015
	0.201513
	0.0826417
