# Supplementary material for: Optimized Vivid-derived Magnets photodimerizers for subcellular optogenetics in mammalian cells
Source: eLife. 2020 Nov 11;9:e63230. doi: 10.7554/eLife.63230 (PMC7735757; doi:10.7554/eLife.63230)
Supplement: Figure 2—source data 1. [file elife-63230-fig2-data1.xlsx]

## Sheet: PIP2 depletion
Time (sec)	Event1	Event2	Event3	Event4	Event5	Event6	Event7	Event8	Event9	Event10	AVERAGE	ES	N
0	1	1	1	1	1	1	1	1	1	1	1	0	10
2	0.988708	0.988348	0.977998	0.993395	0.970859	0.998589	0.970859	1.0318	1.00046	0.972673	0.989368	0.00588709	10
4	0.995601	1.02294	1.00932	0.986791	0.941268	0.999842	0.941268	1.02147	1.01347	0.919981	0.985196	0.0118134	10
6	0.948028	0.993605	0.961183	1.01134	0.940921	0.999319	0.940921	0.952102	1.02787	0.950303	0.972559	0.0102031	10
8	0.947614	1.02652	0.938504	1.01701	0.990976	0.99924	0.990976	0.922399	1.02671	0.999637	0.985958	0.0117593	10
10	0.987594	0.92458	0.847741	0.968432	0.946757	0.87642	0.946757	0.998306	0.943138	0.963807	0.940353	0.0148816	10
12	0.969345	0.948478	0.772262	0.979262	0.868417	0.821996	0.868417	1.00815	0.960244	0.860675	0.905725	0.0245814	10
14	0.891606	0.833854	0.696772	0.920799	0.767718	0.842046	0.767718	0.914046	0.91697	0.758915	0.831044	0.0252492	10
16	0.839333	0.791592	0.685425	0.848407	0.754232	0.799137	0.754232	0.835161	0.789212	0.727402	0.782413	0.0166028	10
18	0.740816	0.739147	0.591041	0.805	0.700474	0.806302	0.700474	0.757687	0.768173	0.670083	0.72792	0.0206751	10
20	0.660504	0.692503	0.532654	0.806528	0.680028	0.786105	0.680028	0.682013	0.77566	0.660267	0.695629	0.0250814	10
22	0.609471	0.586945	0.465296	0.718586	0.599967	0.694541	0.599967	0.620335	0.666217	0.551127	0.611245	0.0229318	10
24	0.542121	0.603439	0.401888	0.675582	0.663458	0.652663	0.663458	0.563683	0.600937	0.636945	0.600417	0.0262113	10
26	0.502101	0.524228	0.380663	0.707496	0.661246	0.612783	0.661246	0.522846	0.678567	0.630947	0.588212	0.0323778	10
28	0.429788	0.576605	0.401171	0.702628	0.626875	0.576682	0.626875	0.446306	0.651109	0.59243	0.563047	0.0323538	10
30	0.454154	0.563912	0.442317	0.655808	0.572849	0.56792	0.572849	0.468156	0.616966	0.54602	0.546095	0.0222567	10
32	0.491465	0.5406	0.446546	0.702786	0.700251	0.694762	0.700251	0.50244	0.669135	0.669157	0.611739	0.0326945	10
34	0.475513	0.557749	0.43954	0.698455	0.787812	0.698824	0.787812	0.488439	0.672938	0.779959	0.638704	0.0432315	10
36	0.601771	0.637809	0.484183	0.786794	0.766528	0.792099	0.766528	0.601171	0.739006	0.735897	0.691179	0.0327889	10
38	0.563043	0.617898	0.398379	0.815768	0.785907	0.725355	0.785907	0.560354	0.772997	0.778903	0.680451	0.0437813	10
40	0.58949	0.605846	0.421961	0.806985	0.832637	0.790202	0.832637	0.610812	0.778039	0.850757	0.711937	0.0457648	10
42	0.57795	0.605158	0.436563	0.838658	0.799854	0.84271	0.799854	0.568973	0.816219	0.803279	0.708922	0.0463524	10
44	0.582729	0.655268	0.45558	0.873536	0.889088	0.833407	0.889088	0.589862	0.856686	0.87087	0.749612	0.0512272	10
46	0.589007	0.664602	0.461545	0.823709	0.844165	0.858295	0.844165	0.589934	0.775833	0.819333	0.727059	0.0443653	10
48	0.633401	0.712681	0.518396	0.8879	0.843542	0.923294	0.843542	0.652315	0.874551	0.844132	0.773375	0.042639	10
50	0.630559	0.725695	0.554544	0.901411	0.850726	0.990757	0.850726	0.612175	0.850763	0.83555	0.780291	0.0449114	10
52	0.643467	0.750257	0.550502	0.891163	0.908745	1.04535	0.908745	0.648582	0.869241	0.862282	0.807833	0.0485765	10
54	0.687863	0.793221	0.554399	0.848207	0.91216	1.03252	0.91216	0.677565	0.827843	0.89442	0.814036	0.0443723	10
56	0.723796	0.792024	0.554927	0.862483	0.947297	1.04078	0.947297	0.738999	0.833814	0.910663	0.835208	0.0442114	10
58	0.712654	0.793017	0.610255	0.909647	0.881734	1.0271	0.881734	0.774522	0.906001	0.880877	0.837754	0.0372395	10
60	0.740644	0.856779	0.588863	0.889982	0.901695	1.03203	0.901695	0.736927	0.86126	0.916148	0.842602	0.039018	10
62	0.759911	0.861783	0.558645	0.886742	0.943132	1.01865	0.943132	0.765457	0.860723	0.958407	0.855658	0.0420285	10
64	0.724917	0.79686	0.510683	0.972232	0.96957	0.998589	0.96957	0.73598	0.947496	0.933972	0.855987	0.0503783	10
66	0.732105	0.787716	0.483357	0.959383	0.890861	0.999842	0.890861	0.758542	0.9246	0.939452	0.836672	0.0483181	10
68	0.69984	0.786596	0.51463	1.00466	0.94352	1.07588	0.94352	0.707035	0.962425	0.947589	0.858569	0.0551102	10
70	0.739136	0.762465	0.462884	0.989416	0.938826	1.09102	0.938826	0.749794	0.961808	0.921657	0.855583	0.056812	10
72	0.769414	0.788725	0.474961	1.04242	0.920083	1.10204	0.920083	0.787178	0.997873	0.937999	0.874077	0.0566699	10
74	0.750062	0.788135	0.42172	1.04509	0.954106	1.10172	0.954106	0.748468	0.964278	0.956425	0.868411	0.0625071	10
76	0.771018	0.807014	0.577415	1.01762	0.973591	1.05377	0.973591	0.791216	0.914755	0.974207	0.88542	0.0463186	10
78	0.732791	0.812373	0.598872	1.02856	0.956519	1.07863	0.956519	0.768018	0.944437	0.925808	0.880253	0.0468213	10
80	0.790119	0.834116	0.555064	1.03554	0.960419	1.0527	0.960419	0.782087	0.950587	0.953649	0.88747	0.0473939	10
82	0.761607	0.91241	0.575879	1.0412	0.948927	1.115	0.948927	0.767657	0.939163	0.97039	0.898116	0.0493603	10
84	0.808232	0.883795	0.607911	1.09576	0.974084	1.07008	0.974084	0.824046	0.998457	0.961895	0.919834	0.045654	10
86	0.813582	0.924589	0.646552	1.0355	0.949964	1.09554	0.949964	0.835397	0.967794	0.927042	0.914592	0.0396188	10
88	0.788288	0.880943	0.678757	1.04717	0.942445	1.08827	0.942445	0.786786	0.9587	0.916919	0.903072	0.0392927	10
90	0.807985	0.911273	0.670825	1.06188	0.994159	1.07319	0.994159	0.794708	0.956539	0.987023	0.925174	0.0409018	10
92	0.74131	0.87501	0.795517	1.04843	0.977481	1.11382	0.977481	0.735756	0.941592	0.934868	0.914127	0.0400566	10
94	0.824888	0.894837	0.736424	1.05698	0.984808	1.10031	0.984808	0.842521	0.96075	0.954895	0.934122	0.034951	10
96	0.847876	0.950984	0.691112	1.09148	0.966446	1.07618	0.966446	0.83682	1.03403	0.962549	0.942392	0.0384967	10
98	0.842276	0.944416	0.684213	1.03704	0.990186	1.09779	0.990186	0.853255	0.948468	0.963168	0.9351	0.0368545	10
100	0.857489	0.89497	0.698911	1.08696	0.938891	1.08957	0.938891	0.874177	0.976359	0.936	0.929222	0.0358145	10
102	0.82111	0.942521	0.744546	1.13014	0.931231	1.0987	0.931231	0.803023	0.995657	0.963342	0.936149	0.038886	10
104	0.830293	0.95394	0.777645	1.1215	0.971712	1.04963	0.971712	0.817587	1.01187	0.959752	0.946564	0.0342654	10
