# Supplementary material for: Optimized Vivid-derived Magnets photodimerizers for subcellular optogenetics in mammalian cells
Source: eLife. 2020 Nov 11;9:e63230. doi: 10.7554/eLife.63230 (PMC7735757; doi:10.7554/eLife.63230)
Supplement: Figure 3—source data 1. [file elife-63230-fig3-data1.xlsx]

## Sheet: ER-Lysosomes Contacts
3 independent experiments in HeLa
190703_New MagnetsVectorTest
190719_ER_lysososmes Contacts
191204_Optogenetics
Protocol: 1 minute dark (30 frames)/ 1 minute ON (30 frames)/2 minutes OFF (60 frames)
See comment and Material and Methods for detals on analysis
time (s)	Cell1	Cell2	Cell3	Cell4	Cell5	Cell6	Cell7	Cell8	Cell9	Cell10	Cell11	Cell12	Cell13	Cell14	Average	ES	N
0	1	1	1	1	1	1	1	1	1	1	1	1	1	1	1	0	14		Pre-excitation: 1 minute
2	1.02215	0.984292	1.05112	0.971082	0.992371	0.956428	0.967353	1.05497	0.997494	0.977933	1.00405	0.982406	0.975276	0.575339	0.965162	0.0310093	14
4	1.00145	1.05975	0.977871	0.941048	0.988646	0.931706	0.954377	0.867011	0.986854	0.970163	1.01077	0.971385	0.956116	0.778397	0.956824	0.0180097	14
6	0.992331	1.02711	1.0573	0.920029	0.976265	0.90885	0.942219	0.996679	0.936722	0.990349	0.962739	0.967809	0.976055	0.868962	0.965959	0.0129955	14
8	0.985189	0.948626	1.07282	0.907131	0.934577	0.940626	0.882508	1.03896	0.892154	1.02633	0.950643	0.966751	1.00197	0.81492	0.954515	0.0183185	14
10	1.02783	1.02755	1.04226	0.945734	0.955444	0.944404	0.911005	1.00689	0.974165	1.03418	0.987436	1.01138	0.975958	0.592134	0.959741	0.030171	14
12	0.962352	1.00853	1.06844	0.923302	0.948011	0.925557	0.893168	0.916698	1.01319	1.04532	0.981893	0.888351	0.993907	0.95558	0.966021	0.014736	14
14	1.01478	1.02482	1.03533	0.977402	1.01542	0.960656	0.890667	0.921832	0.824801	1.0315	0.976698	0.968911	1.03126	0.994085	0.976298	0.0163725	14
16	1.02366	0.996789	1.04097	0.937175	1.03352	0.936047	0.908618	1.00993	0.878658	1.04672	1.00033	0.928048	1.01869	0.941104	0.97859	0.0147027	14
18	1.03088	1.02338	1.03996	0.950995	0.91235	0.978077	0.89471	0.963883	0.806003	1.0409	0.953055	0.944535	0.995836	1.02206	0.968331	0.0177132	14
20	1.00137	0.977853	1.04849	0.946807	0.954441	0.976403	0.89081	1.17408	0.873503	1.04527	0.955116	0.974163	1.01986	0.594851	0.959502	0.0341977	14
22	1.08305	1.02188	1.03038	1.02383	1.00207	0.950548	0.886023	1.09075	0.850789	1.04856	0.946049	0.889946	1.00278	0.768192	0.971061	0.0250501	14
24	1.04243	1.01855	1.00791	0.96924	1.00349	0.8689	0.873217	0.849868	0.886188	1.10718	0.957034	0.884894	1.00996	1.08645	0.968951	0.0225537	14
26	0.992434	0.984329	1.01121	0.969884	0.912831	0.964443	0.845079	0.717944	0.810495	1.05877	0.973805	0.888302	1.0107	0.848276	0.927751	0.0252828	14
28	0.975938	0.968552	0.96134	0.96355	0.861517	0.971064	0.872288	0.679337	0.843776	1.05354	0.947908	0.902105	0.990212	0.537429	0.894897	0.0365041	14
30	0.974079	0.963918	0.958157	0.923481	0.856661	0.936039	0.91549	0.541066	0.835026	1.11917	0.994644	0.880468	0.967631	0.938251	0.914577	0.0340019	14
32	0.978513	0.952585	0.957267	0.991832	0.90089	0.924341	0.91723	0.636697	0.853899	1.07401	1.00884	0.924284	0.96828	0.847677	0.924025	0.0272373	14
34	0.982498	0.956427	0.964969	0.967092	0.956527	0.920661	0.933634	0.688005	0.887159	1.06657	0.974446	0.958126	1.00232	0.824836	0.934519	0.023982	14
36	0.984999	0.944955	1.02558	0.946389	0.954863	0.91652	0.979786	0.654772	0.843813	1.0856	0.947814	0.95873	0.931553	0.802473	0.926989	0.0277946	14
38	1.02209	0.948388	1.01683	0.956427	0.941422	0.874752	1.03462	0.5928	0.775017	1.083	1.00857	0.907796	1.02229	0.759042	0.924503	0.0360331	14
40	0.997094	0.967872	1.02385	0.947057	0.890095	0.83974	0.957348	0.731243	0.933507	1.01134	1.01457	0.908523	0.999239	0.746336	0.926273	0.0254196	14
42	0.983224	0.955521	1.06179	0.956765	0.853213	0.852036	0.8581	0.636932	0.858175	1.01576	0.924643	0.955976	1.0255	0.709946	0.903399	0.0319218	14
44	0.929659	1.0334	1.01906	0.969327	0.873323	0.840328	0.907993	0.736452	0.86644	1.05641	0.881119	0.972008	0.972885	0.539921	0.89988	0.0359213	14
46	0.970902	1.00092	1.01905	0.953606	0.887326	0.874271	0.923274	0.755763	0.98591	1.06514	0.94149	1.02301	0.962226	0.894372	0.946947	0.0208315	14
48	0.986062	1.02477	1.00833	0.971834	0.844015	0.825014	0.970088	0.662918	0.951459	1.06431	0.967033	1.06223	1.03786	1.0769	0.960916	0.0304322	14
50	1.04447	1.05897	1.02783	0.973516	0.907381	0.845858	0.935174	0.582855	1.033	1.07407	1.06116	1.11114	1.03733	0.730357	0.958794	0.0399505	14
52	0.959438	0.994501	1.02053	0.95301	0.893084	0.870255	0.949146	0.736799	1.10151	1.13187	0.98808	1.0509	1.00389	0.888657	0.967262	0.0269581	14
54	0.96788	0.992148	0.99145	0.975452	0.896514	0.83263	0.930866	0.707012	1.08858	1.11139	0.93062	1.07727	0.987417	0.862048	0.953663	0.028831	14
56	0.939121	1.04789	0.959889	0.981769	0.936948	0.78879	0.924201	0.754933	1.04255	1.10876	0.896121	1.0809	0.979046	0.841881	0.948772	0.027933	14
58	0.933045	1.03758	0.992592	0.945718	0.980668	0.848538	0.983097	0.764392	0.872173	1.16208	0.815426	1.03315	0.994263	1.03522	0.956996	0.0278505	14
60	0.960111	1.0148	1.03774	1.01737	1.02251	0.870901	1.02576	0.858392	0.746929	1.1753	0.826417	1.051	0.988208	0.581477	0.941209	0.0403177	14
62	0.947943	1.04836	0.903436	0.983229	1.06699	0.878884	0.970476	0.920644	0.892874	1.17411	0.875932	1.06813	0.999052	0.790653	0.965766	0.0267493	14
64	1.01146	1.29411	1.10117	1.09394	1.28611	1.03095	1.03995	1.11689	1.19465	1.33897	1.0492	1.09457	1.28859	1.22023	1.15434	0.0302194	14		Excitation: 1 minute
66	1.05696	1.4486	1.14484	1.2253	1.29897	1.05516	1.01011	1.21209	1.27379	1.53625	1.07912	1.2373	1.3651	1.39861	1.23873	0.0427835	14
68	1.0825	1.44493	1.22985	1.24661	1.37044	1.13825	1.06323	1.59942	1.35892	1.58818	1.18019	1.31651	1.44256	1.33264	1.31387	0.0452564	14
70	1.06971	1.50341	1.28494	1.30245	1.44267	1.11956	1.08529	1.40613	1.44076	1.69399	1.23758	1.30868	1.45763	1.03648	1.31352	0.0511225	14
72	1.09188	1.53381	1.24674	1.26489	1.4143	1.1895	1.0468	1.56648	1.59525	1.79017	1.28777	1.34755	1.50123	1.33478	1.37223	0.0555179	14
74	1.11435	1.49257	1.29217	1.27589	1.41316	1.17716	1.09149	1.52325	1.58463	1.82509	1.2707	1.39633	1.62289	1.33719	1.38692	0.0554773	14
76	1.12182	1.50958	1.2547	1.3195	1.43681	1.20902	1.08014	1.49208	1.68089	1.8565	1.31421	1.42552	1.61087	1.63649	1.42487	0.0598828	14
78	1.12024	1.55896	1.30015	1.36329	1.43312	1.23634	1.07501	1.48474	1.73125	1.83012	1.2871	1.45269	1.62266	1.64391	1.43854	0.0599475	14
80	1.12668	1.55251	1.36948	1.31131	1.46971	1.21876	1.09845	1.53872	1.67512	1.88424	1.28635	1.49495	1.65509	1.79194	1.46238	0.0642357	14
82	1.08075	1.59537	1.36982	1.36549	1.43963	1.21702	1.02706	1.7052	1.54995	1.88852	1.34337	1.47304	1.67317	1.84397	1.46945	0.0696675	14
84	1.18674	1.64517	1.38477	1.35278	1.49302	1.14825	1.05073	1.68621	1.76482	1.88963	1.36595	1.48847	1.7771	1.83204	1.50469	0.0719136	14
86	1.16344	1.65901	1.40801	1.35609	1.50755	1.19303	1.04679	1.72467	1.58079	1.92902	1.45795	1.52835	1.7834	1.83858	1.51262	0.0704683	14
88	1.19891	1.69546	1.35799	1.37407	1.47492	1.24705	1.07416	1.58865	1.68037	1.90231	1.44166	1.52216	1.73922	1.78618	1.50594	0.0644336	14
90	1.13539	1.699	1.36775	1.35266	1.43759	1.22914	1.11099	1.66498	1.55698	1.93485	1.43593	1.4851	1.84539	1.816	1.50512	0.0696536	14
92	1.14354	1.69447	1.40782	1.42075	1.52159	1.19217	1.12244	1.68037	1.68053	1.88747	1.43796	1.44114	1.87487	1.58502	1.50644	0.0657658	14
94	1.18383	1.69518	1.39062	1.38925	1.50349	1.21012	1.0555	1.66454	1.6386	1.91463	1.45319	1.44996	1.8878	1.73888	1.51254	0.0692206	14
96	1.25489	1.67351	1.35869	1.38659	1.46913	1.23404	1.02621	1.62939	1.70717	1.95166	1.45633	1.50785	1.89039	1.64659	1.51375	0.0685828	14
98	1.11887	1.6766	1.38461	1.37306	1.50233	1.23133	1.05133	1.53926	1.63479	1.94711	1.42944	1.50944	1.87192	1.85063	1.50862	0.0727888	14
100	1.12772	1.64566	1.39311	1.32344	1.49328	1.21678	1.11782	1.46939	1.59444	1.96945	1.45174	1.44538	1.90376	1.91522	1.5048	0.0741021	14
102	1.1547	1.63319	1.40486	1.32247	1.54447	1.22336	1.06024	1.60604	1.66913	1.89032	1.40825	1.41829	1.93048	1.94614	1.51514	0.0755154	14
104	1.14054	1.72864	1.41234	1.34149	1.46239	1.25099	1.07316	1.65512	1.58209	1.96638	1.5174	1.505	1.86505	1.95649	1.53265	0.0754204	14
106	1.14558	1.74576	1.47185	1.31534	1.51517	1.26364	1.09495	1.59892	1.52073	1.91363	1.50065	1.49808	2.03198	1.76398	1.52716	0.0728066	14
108	1.1622	1.75042	1.35901	1.3276	1.55786	1.29062	1.10302	1.59693	1.43729	1.978	1.45791	1.54891	1.81721	1.83916	1.51615	0.069897	14
110	1.18054	1.68301	1.41753	1.30372	1.51386	1.23936	1.14039	1.47868	1.47956	1.94279	1.47815	1.64713	1.85886	1.50543	1.49064	0.0631133	14
112	1.16385	1.70316	1.34594	1.30452	1.51729	1.22985	1.12644	1.63209	1.33079	1.9426	1.45518	1.67458	1.86161	1.3989	1.47763	0.0678347	14
114	1.18394	1.74792	1.31034	1.32409	1.53476	1.23362	1.13179	1.63216	1.36486	1.9677	1.51242	1.58849	1.90668	1.47366	1.49374	0.0689005	14
116	1.17943	1.75636	1.2992	1.35178	1.51	1.25533	1.07176	1.63424	1.44739	1.95072	1.56419	1.61361	2.00106	1.28035	1.49396	0.0746382	14
118	1.17348	1.7113	1.22346	1.35502	1.61753	1.26712	1.19651	1.5426	1.14561	1.87858	1.63665	1.62777	1.94409	1.33004	1.47498	0.0715596	14
120	1.22595	1.68552	1.32948	1.30633	1.54166	1.21064	1.1469	1.43476	1.15725	1.84464	1.51026	1.5923	1.84266	1.38534	1.44383	0.0629749	14
122	1.12445	1.63612	1.15084	1.25789	1.46714	1.20627	1.09093	1.54809	1.25528	1.8244	1.53349	1.56427	1.66887	1.44791	1.41257	0.0616481	14
124	1.14318	1.57045	1.2499	1.23465	1.43411	1.14002	1.0268	1.51232	1.17496	1.77513	1.47622	1.58929	1.75025	1.30576	1.3845	0.06319	14		Recovery: 2 minutes
126	1.1199	1.60071	1.27271	1.18613	1.44576	1.16372	1.04467	1.47132	1.16603	1.71566	1.47355	1.52136	1.68857	1.20843	1.36275	0.0595323	14
128	1.07498	1.50726	1.21891	1.19122	1.42039	1.14136	1.01254	1.46937	1.08299	1.65266	1.4918	1.49669	1.69525	1.20327	1.33276	0.0602403	14
130	1.06366	1.53886	1.23143	1.15226	1.38267	1.1348	1.02796	1.51903	1.11849	1.6687	1.42554	1.44426	1.61458	1.39396	1.33687	0.0569246	14
132	1.09175	1.52377	1.17466	1.20509	1.40827	1.122	0.96493	1.36522	1.12749	1.62496	1.40709	1.46852	1.54029	1.30791	1.30943	0.0529298	14
134	1.06439	1.44178	1.18961	1.12129	1.35107	1.12228	0.963624	1.31172	1.15425	1.58906	1.40242	1.4658	1.53073	1.34006	1.28915	0.0504477	14
136	1.08597	1.39914	1.19816	1.09284	1.3399	1.11169	0.997046	1.41533	1.10028	1.53761	1.35566	1.44045	1.62417	1.26596	1.28316	0.0509527	14
138	1.02798	1.36272	1.13074	1.12261	1.2951	1.13555	1.03237	1.37129	1.2487	1.53625	1.38862	1.37344	1.50659	1.28005	1.27229	0.0435915	14
140	1.03993	1.31039	1.13076	1.11315	1.25066	1.14831	0.9546	1.1623	1.07454	1.49028	1.31872	1.40227	1.55456	1.38357	1.23815	0.0475255	14
142	1.04977	1.31608	1.13302	1.13859	1.2745	1.13158	0.892513	1.16805	1.12934	1.4291	1.24797	1.42523	1.5095	1.25736	1.22161	0.0440499	14
144	1.00568	1.32932	1.13584	1.10205	1.21899	1.11172	0.945827	1.21824	1.04184	1.47182	1.24665	1.3698	1.4366	1.2634	1.20698	0.0426143	14
146	1.05168	1.32502	1.16909	1.06627	1.18368	1.11339	1.04659	1.20527	0.979087	1.37034	1.23663	1.31404	1.46643	1.10481	1.18802	0.0376505	14
148	0.997231	1.29425	1.18697	1.09335	1.16241	1.13758	1.02553	1.09131	1.2334	1.31253	1.33738	1.32676	1.45194	1.17983	1.20218	0.0348974	14
150	1.01839	1.2916	1.15346	1.06038	1.17366	1.09288	1.029	1.05775	1.06171	1.33025	1.28516	1.34738	1.46113	1.28574	1.18918	0.0380597	14
152	1.01733	1.29775	1.12202	1.11797	1.16136	1.06043	1.04045	1.16546	1.09492	1.35639	1.25923	1.24924	1.37543	1.24568	1.18312	0.0308899	14
154	1.01434	1.35555	1.15237	1.15403	1.19736	1.10874	0.971214	1.1616	1.08868	1.31327	1.23205	1.1848	1.36869	1.31224	1.18678	0.0323345	14
156	1.01609	1.31719	1.17729	1.08569	1.17315	1.0481	1.00602	1.12974	1.04405	1.30161	1.18749	1.21025	1.42242	1.23816	1.16838	0.0330941	14
158	1.03835	1.33138	1.16704	1.08322	1.13164	1.07698	0.993164	1.19008	1.09567	1.32306	1.20707	1.25979	1.39945	1.05211	1.16779	0.0329482	14
160	1.02919	1.34802	1.20808	1.02801	1.12306	1.01476	1.02989	1.22348	1.12569	1.3044	1.21585	1.2227	1.43452	0.990613	1.16416	0.0369513	14
162	1.01819	1.31701	1.07724	1.05064	1.0806	0.995413	1.02406	1.17326	0.974066	1.327	1.15654	1.22615	1.42279	0.822821	1.11898	0.0433273	14
164	0.986176	1.24127	1.12636	1.08204	1.1258	0.996866	1.02592	1.11425	0.969398	1.30434	1.15693	1.21724	1.3535	0.821015	1.10865	0.0383572	14
166	1.02252	1.2451	1.05316	1.01391	1.05269	0.92048	1.04437	1.19277	0.960726	1.31496	1.17352	1.27433	1.34084	0.754516	1.09742	0.0445676	14
168	1.00275	1.25862	1.11206	1.05791	1.06333	0.970812	1.05214	1.13246	1.01274	1.30863	1.27556	1.22506	1.37556	0.831464	1.11994	0.0404643	14
170	1.01067	1.2476	1.04799	1.02169	1.14064	0.902891	1.00716	1.11936	1.00971	1.30995	1.17559	1.24826	1.38359	0.882223	1.10767	0.040264	14
172	1.0028	1.27653	1.11549	1.00035	1.07219	0.936463	0.97822	1.09502	0.900539	1.30759	1.1497	1.2325	1.42827	0.812682	1.09345	0.0460392	14
174	0.978968	1.23738	1.1784	1.01392	1.03082	0.942926	0.962635	1.04945	0.948036	1.28864	1.16352	1.23841	1.36911	0.890107	1.09231	0.0402925	14
176	0.970556	1.23529	1.09924	1.03199	1.13425	0.963645	0.961004	1.03699	1.01147	1.26283	1.15784	1.25026	1.32539	0.872473	1.0938	0.0366934	14
178	0.981468	1.2011	1.17147	0.983881	1.09068	1.05038	0.959777	1.02313	0.954015	1.26751	1.12206	1.26187	1.40603	0.791368	1.09034	0.04288	14
180	0.988129	1.23516	1.14814	1.01618	1.12743	1.0361	0.944247	0.994525	1.02031	1.2285	1.13758	1.24222	1.31122	0.873798	1.09311	0.0347648	14
182	1.00145	1.24695	1.15668	1.0078	1.09402	1.02418	0.937412	0.995197	1.0175	1.22446	1.12308	1.24479	1.36601	0.77281	1.0866	0.040958	14
184	1.02748	1.24608	1.11847	1.04772	1.08424	0.981514	0.930896	0.978805	1.06543	1.26304	1.07907	1.25666	1.34581	0.69636	1.08011	0.0443397	14
186	1.0061	1.23496	1.16313	1.00903	1.12984	0.976788	0.930379	1.24859	1.01242	1.292	1.11979	1.23512	1.40006	0.593357	1.09654	0.0532438	14
188	0.9397	1.18355	1.08547	1.0105	1.11299	1.02567	0.886048	1.0846	1.03319	1.28427	1.13092	1.23324	1.37008	0.565461	1.06755	0.0520813	14
190	0.95635	1.13905	1.22449	1.01594	1.06635	1.02694	0.918737	1.2185	1.07229	1.27269	1.11303	1.19568	1.39468	0.620855	1.08826	0.049862	14
192	0.930849	1.19399	1.16618	1.01738	1.04527	1.0394	0.890348	1.23077	1.06873	1.24505	1.09662	1.18473	1.40366	0.609151	1.08015	0.0509908	14
194	0.927657	1.19324	1.1273	1.08892	1.04577	0.971009	0.898562	1.07313	0.942883	1.28034	1.09156	1.15023	1.3031	0.542469	1.04544	0.0508369	14
196	0.980717	1.20071	1.14866	1.04874	1.10764	0.985754	0.87087	1.02268	1.05063	1.26281	1.12391	1.15938	1.24653	0.504753	1.05098	0.051149	14
198	1.00807	1.20624	1.08146	1.03229	1.02591	0.965958	0.905658	1.15579	1.15414	1.30545	1.12506	1.14628	1.30914	0.497272	1.06562	0.0538308	14
200	1.00166	1.14941	1.07115	1.00869	1.05161	0.997977	0.913571	1.07454	1.07108	1.2532	1.06766	1.1726	1.38713	0.605199	1.05896	0.0471001	14
202	0.942227	1.15137	0.996497	0.973594	1.10337	0.98187	0.936669	1.06458	0.997085	1.25902	1.07075	1.21618	1.35085	0.55998	1.04315	0.0500356	14
204	0.98625	1.12332	1.01444	0.994834	1.09971	0.929041	0.899734	1.03468	1.06194	1.24814	1.04708	1.21063	1.32169	0.538368	1.03642	0.0498281	14
206	0.957915	1.15345	1.06824	0.997695	1.03781	0.955838	0.953902	1.06859	1.08702	1.2947	1.03621	1.21124	1.29897	0.552665	1.04816	0.0490326	14
208	0.983568	1.1104	1.06764	0.973001	1.06687	0.952438	0.906345	1.06597	0.989532	1.2724	1.04075	1.19588	1.36404	0.72344	1.05088	0.0422405	14
210	1.03018	1.1121	1.00028	1.01058	1.00472	0.982082	0.905302	1.0555	0.964587	1.22162	1.02027	1.15957	1.32682	0.621062	1.02962	0.043244	14
212	0.979794	1.08127	1.03597	0.994462	1.0569	0.9502	0.891957	1.0017	0.922444	1.20283	1.00015	1.19957	1.3663	0.587989	1.0194	0.0475429	14
214	0.973939	1.16034	0.997416	0.998761	1.02135	0.940934	0.914475	1.00494	1.0666	1.25775	0.98925	1.14658	1.34833	0.607436	1.03058	0.0464393	14
216	1.01046	1.12902	1.03266	0.986501	1.00214	0.934572	0.902424	0.986265	1.00382	1.24842	0.958475	1.15271	1.3404	0.645478	1.02381	0.0440025	14
218	1.02584	1.10942	1.03924	1.00348	1.04856	0.975426	0.947824	1.04322	1.14742	1.25297	0.956259	1.14472	1.27793	0.67862	1.04649	0.0392646	14
220	1.02533	1.17049	1.11123	0.989713	1.08542	0.979779	0.921025	1.01913	1.24886	1.21695	1.00974	1.24933	1.32838	0.579906	1.06681	0.0497013	14
222	1.01872	1.08473	0.951673	1.00495	1.08226	0.97718	0.910677	0.952908	1.135	1.21281	1.001	1.18284	1.28418	0.640611	1.0314	0.0419602	14
224	0.987197	1.01801	1.02966	0.997848	1.06614	0.969908	0.871069	1.05261	1.08255	1.21901	0.937194	1.08083	1.36172	0.626546	1.02145	0.0441758	14
226	0.964868	1.02899	0.992525	1.02265	1.098	1.01202	0.885056	1.09347	0.915375	1.26083	0.990144	1.08286	1.26229	0.656002	1.01893	0.0405056	14
228	1.00026	1.01888	0.962265	1.02544	1.11175	0.980467	0.9293	1.05241	0.908384	1.25904	1.08437	1.08168	1.30012	0.599991	1.02245	0.0441866	14
230	0.981361	1.02074	0.974553	1.01991	1.03507	1.03042	0.886392	0.941961	1.1133	1.19904	1.13273	1.09555	1.27543	0.617277	1.02312	0.0415567	14
232	1.0023	0.985376	0.9063	1.0165	1.08522	0.957165	0.841235	0.929724	1.05282	1.25073	1.12017	1.19721	1.31747	0.597691	1.01857	0.0483417	14
234	0.998848	1.03615	0.911642	1.03781	1.11552	0.986539	0.862481	0.910296	0.980624	1.21775	1.09651	1.23669	1.24103	0.545799	1.01269	0.0483972	14
236	1.05158	1.01382	0.871362	1.08743	1.10942	0.946862	0.847886	1.11426	0.951829	1.17861	1.14362	1.18834	1.25502	0.568745	1.02349	0.0475587	14
238	0.975169	1.04304	0.868667	1.08439	1.1385	0.99241	0.822697	1.15909	0.962487	1.21187	1.12457	1.11413	1.37235	0.584103	1.03239	0.0510651	14
240	0.985058	1.0691	0.970552	1.06061	1.05433	0.920908	0.810925	1.15911	0.973145	1.2551	1.15532	1.18585	1.3471	0.57783	1.0375	0.0515313	14

## Sheet: ER-Mito Contacts
3 independent experiments in HeLa
200310_OptoContacts
190703_EREGFPnMag12+4+MitopMag
190723_Optogenetics
Protocol: 1 minute dark (30 frames)/ 2 minutes ON (60 frames)/5 minutes OFF (150 frames)
See Material and Methods for detals on analysis
time (s)	Cell1	Cell2	Cell3	Cell4	Cell5	Cell6	Cell7	Cell8	Cell9	Cell10	Cell11	Cell12	Cell13	Cell14	Average	ES	N
0	1	1	1	1	1	1	1	1	1	1	1	1	1	1	1	0	14		Pre-excitation: 1 minute
2	0.992274	1.01783	0.99472	0.99658	0.976401	1.00891	0.995227	0.986104	1.0091	1.00969	0.997298	0.977617	1.00096	1.01131	0.998144	0.00334365	14
4	0.975075	0.959715	0.995818	0.99337	0.979604	1.02881	0.960768	0.982896	1.03084	0.972371	1.01107	1.00513	1.00139	1.0044	0.992946	0.00600879	14
6	1.09435	1.0177	0.987745	0.984905	0.966178	0.988653	0.982942	0.996593	1.02116	0.998758	1.00597	1.00854	0.998605	1.01248	1.00461	0.00797865	14
8	0.926169	0.962185	0.996365	0.985034	1.00103	1.00903	0.97937	0.961967	1.0095	0.967036	1.00881	0.944305	0.97635	1.01801	0.981798	0.0072909	14
10	0.989446	0.992146	0.98722	0.981187	1.00511	1.02513	0.940015	0.993943	1.02478	0.981575	0.998037	1.03828	0.993224	0.988092	0.995585	0.00634223	14
12	0.924667	0.979428	0.998698	0.982419	1.00161	1.04402	0.903714	1.01888	1.00918	0.984588	1.01365	0.990888	0.966626	1.05813	0.991178	0.0109871	14
14	0.992753	0.897144	0.994033	0.95716	0.995149	1.05212	0.976842	1.01973	1.00195	0.94487	1.01344	1.03698	0.996744	1.0512	0.995008	0.0112521	14
16	1.00238	0.947137	0.997212	0.966544	0.955422	1.0389	0.995572	0.984273	1.00824	0.937123	1.02317	1.08715	0.975071	1.02842	0.996186	0.0107604	14
18	1.03905	0.956015	0.991427	0.957549	0.95555	0.983849	1.10337	0.994153	1.0276	0.926941	1.01613	1.07338	0.986997	1.11942	1.00939	0.0154123	14
20	1.03141	0.981836	0.997298	0.969196	0.995786	1.00306	0.989322	1.0053	1.02537	0.942564	1.01685	0.996001	0.996383	1.06389	1.00102	0.0076907	14
22	1.00034	0.96705	0.996172	0.960426	0.959234	1.02704	0.966037	1.02703	1.01223	0.978976	1.0031	0.99424	1.00273	0.883119	0.984123	0.00986659	14
24	1.04195	0.990687	0.991831	0.962625	0.956775	1.01505	0.894093	1.02855	1.02394	0.947595	1.01176	1.01809	0.979967	1.02172	0.991759	0.0107784	14
26	1.01713	0.964498	0.997903	0.977981	0.947489	0.987373	0.995434	1.01941	1.03065	0.954131	1.0141	1.01575	1.00052	0.811227	0.980971	0.014716	14
28	1.04695	0.933585	0.994153	0.987166	0.956054	1.00717	1.00137	1.01905	1.02022	0.979908	1.00968	0.989094	0.946615	0.990674	0.991549	0.00816166	14
30	1.05228	0.929888	0.992584	0.960696	0.951684	0.968701	0.950173	1.01708	1.03459	1.01338	1.01691	0.989865	0.996839	0.925981	0.98576	0.0104174	14
32	0.936151	0.9051	0.991449	0.988444	0.972158	1.02322	0.998444	1.00612	1.04243	0.972095	1.02326	0.996172	0.975085	0.867604	0.978409	0.01271	14
34	0.994932	0.944743	0.989898	0.978273	0.958232	1.00061	0.879879	1.01777	1.02758	0.97389	1.02438	0.992228	0.995328	0.814447	0.970871	0.0156915	14
36	1.05438	0.918945	0.979169	0.983804	0.947358	1.03784	0.952203	1.00275	1.03028	1.05601	1.02608	0.995343	0.94087	0.911877	0.98835	0.0130164	14
38	0.97757	0.936924	0.987981	0.973154	0.955111	1.02004	0.989064	0.986672	1.02097	1.0067	1.02756	0.974036	0.987623	0.930076	0.98382	0.00789943	14
40	1.07418	0.936948	0.989633	0.959147	0.961386	1.01197	1.00523	0.978863	1.0336	1.00945	1.01806	0.978887	0.969291	1.0339	0.997181	0.00975918	14
42	0.973158	0.872363	0.981334	0.963099	0.957496	1.04299	0.921908	1.00457	1.03205	0.951114	1.0263	1.00328	0.984812	0.941946	0.975458	0.0123555	14
44	0.993276	0.887578	0.99067	0.984462	0.96616	1.04372	0.979474	1.01008	1.04378	1.01241	1.03005	0.982523	1.03106	0.980895	0.99544	0.0107188	14
46	1.0451	0.920746	0.988686	0.992556	0.945579	1.03103	0.998148	0.996885	1.04191	0.993947	1.03112	1.00985	1.00776	1.04404	1.00338	0.00970281	14
48	0.971848	0.891014	0.99431	0.992565	0.939014	1.07373	0.939326	1.0004	1.07722	0.940494	1.02387	1.0003	1.00052	1.03105	0.991118	0.0139719	14
50	1.02986	0.86923	0.980093	0.984251	0.952595	1.0251	0.977635	1.00745	1.07401	1.01271	1.03604	0.98078	0.986669	1.03992	0.996882	0.0130538	14
52	1.04244	0.840461	0.991645	0.987993	0.936536	1.1294	0.996316	1.04383	1.05236	0.975632	1.02371	1.0031	1.00178	1.01963	1.0032	0.0172771	14
54	1.01892	0.895326	0.957493	0.967887	0.946938	1.04313	1.00074	0.99613	1.01774	1.02001	0.999365	1.01296	0.998694	0.9077	0.984503	0.0116935	14
56	1.01905	0.868081	0.965859	0.969841	0.944404	1.07444	1.02575	1.0205	1.01329	1.02872	1.03143	0.799791	0.978531	0.933807	0.976678	0.0194509	14
58	1.13535	0.860312	0.971774	0.95137	0.933186	1.07598	1.01773	0.963547	1.00123	1.03683	1.04263	0.972709	0.962134	1.01773	0.995894	0.0178989	14
60	1.06392	0.851422	0.976272	0.954402	0.95674	1.04892	0.959159	1.00101	1.00961	0.943832	1.03669	0.875254	0.942753	0.983954	0.97171	0.0161079	14
62	0.981054	0.96327	0.977191	0.931065	0.936756	1.02302	0.975972	1.03642	1.05665	0.997438	1.02727	0.98536	0.970908	0.984156	0.989038	0.00966568	14
64	1.09301	0.922377	1.02442	1.01273	0.997554	1.06872	0.998262	1.06947	1.1319	1.05621	1.05986	1.04179	0.985061	1.08969	1.03936	0.014346	14		Excitation: 2 minutes
66	1.09043	1.0166	1.03924	1.05028	1.01131	1.11833	1.04682	1.12778	1.15266	1.10035	1.07574	1.05502	1.04412	1.06249	1.0708	0.0112388	14
68	1.02915	0.965538	1.04938	1.06744	1.05259	1.08911	1.13027	1.13126	1.19267	1.0997	1.08724	1.09883	1.0622	1.21668	1.09086	0.0171621	14
70	1.05429	0.948652	1.04013	1.08586	1.03844	1.09238	1.05634	1.17364	1.24824	1.18137	1.05921	1.08804	1.13147	1.16306	1.09722	0.0203292	14
72	1.05516	0.958069	1.05605	1.09312	1.0455	1.12662	1.0985	1.21471	1.22487	1.12969	1.10804	1.09258	1.14888	1.1822	1.10957	0.0189609	14
74	1.06801	0.990311	1.06262	1.06568	1.05323	1.12668	1.14608	1.2006	1.19332	1.18435	1.14266	1.06977	1.15695	0.942031	1.10016	0.0206393	14
76	1.11787	0.972608	1.05795	1.08513	1.07581	1.15686	1.13209	1.19449	1.21501	1.16431	1.13287	1.08331	1.12626	1.08297	1.11411	0.016446	14
78	1.11001	0.981358	1.05563	1.10363	1.07178	1.15789	1.12182	1.25618	1.22618	1.17941	1.11142	1.06072	1.26746	1.08957	1.12808	0.021762	14
80	1.07231	0.939768	1.06834	1.11103	1.06963	1.1562	1.06227	1.25863	1.22529	1.20495	1.14475	1.09346	1.1452	1.23978	1.12797	0.0231595	14
82	1.13861	1.05535	1.06714	1.09367	1.10873	1.21202	1.09754	1.26151	1.24008	1.21656	1.13112	1.10554	1.21488	1.12831	1.14793	0.0180598	14
84	1.06098	1.01777	1.07506	1.07531	1.10359	1.15036	1.14801	1.21016	1.30564	1.22177	1.13155	1.08981	1.16828	1.00289	1.1258	0.0221747	14
86	1.06889	1.07951	1.07807	1.10471	1.07887	1.23696	1.14146	1.24987	1.31943	1.21848	1.1195	1.07521	1.14451	1.1153	1.14505	0.0212588	14
88	1.07102	1.00713	1.07723	1.11132	1.07991	1.18512	1.23811	1.25954	1.31474	1.20424	1.12334	1.10869	1.19846	1.23208	1.15792	0.0234462	14
90	1.13115	1.00131	1.07425	1.10306	1.07985	1.19896	1.14946	1.3006	1.29443	1.1997	1.08714	1.11174	1.19243	1.23688	1.15435	0.0232323	14
92	1.04705	1.12991	1.07924	1.12337	1.06963	1.14118	1.11553	1.30527	1.34145	1.20393	1.08873	1.08535	1.25448	1.25099	1.15972	0.0252287	14
94	1.1491	1.07157	1.07968	1.12272	1.08579	1.20654	1.12268	1.31	1.36201	1.20577	1.10961	1.14819	1.21728	1.16675	1.16841	0.0228783	14
96	1.1466	1.01471	1.07568	1.10998	1.10418	1.19964	1.09895	1.31524	1.31543	1.13978	1.11042	1.12313	1.22494	1.24893	1.15912	0.0238946	14
98	1.0684	1.01902	1.08858	1.10395	1.10336	1.23547	1.24424	1.35752	1.31139	1.17511	1.08119	1.13656	1.28063	1.36901	1.18389	0.0307129	14
100	1.08929	1.04937	1.0956	1.11543	1.12522	1.23301	1.08845	1.33466	1.39171	1.18823	1.12355	1.15685	1.25459	1.28015	1.18044	0.0276258	14
102	1.16494	1.10355	1.09855	1.12225	1.11516	1.21927	1.17376	1.34586	1.38442	1.17454	1.12247	1.1305	1.24628	1.25249	1.18957	0.024051	14
104	1.10627	1.08243	1.11116	1.13114	1.10619	1.21744	1.10495	1.35928	1.38709	1.18207	1.12041	1.16077	1.28325	1.36474	1.19409	0.029233	14
106	1.13693	1.10069	1.1017	1.14662	1.11055	1.26581	1.21054	1.34809	1.42951	1.23908	1.10836	1.12797	1.21487	1.28215	1.20163	0.0272802	14
108	1.08404	1.10525	1.10675	1.13076	1.10394	1.24345	1.19294	1.31012	1.42252	1.21973	1.11335	1.13954	1.17639	1.30653	1.18967	0.0267963	14
110	1.17004	1.06978	1.10908	1.14136	1.09241	1.25647	1.18241	1.3627	1.40411	1.20565	1.10947	1.13681	1.19147	1.36863	1.20003	0.0290409	14
112	1.24248	1.09083	1.12375	1.14309	1.0819	1.23942	1.19558	1.34545	1.44733	1.19408	1.10164	1.15499	1.19333	1.31477	1.2049	0.0282494	14
114	1.20816	1.09209	1.11813	1.15581	1.09464	1.26918	1.19737	1.32406	1.40973	1.21206	1.10607	1.15009	1.13941	1.33031	1.20051	0.0264928	14
116	1.22295	1.08845	1.12362	1.17917	1.13706	1.26177	1.15248	1.32811	1.38298	1.19187	1.10478	1.14492	1.18551	1.26124	1.1975	0.0228718	14
118	1.17986	1.06334	1.12307	1.18546	1.11338	1.22876	1.19315	1.31923	1.37809	1.17086	1.11392	1.16072	1.30435	1.25714	1.19938	0.0238431	14
120	1.16624	1.1184	1.12478	1.14896	1.13076	1.22501	1.19152	1.31586	1.41946	1.20205	1.10914	1.16898	1.18129	1.30694	1.20067	0.0239209	14
122	1.28261	1.12565	1.12351	1.11809	1.13895	1.2354	1.20474	1.31711	1.41989	1.21989	1.08643	1.15696	1.28145	1.31101	1.21584	0.0259515	14
124	1.16742	1.1885	1.1281	1.13142	1.13192	1.27201	1.20297	1.29319	1.40797	1.14322	1.11126	1.14522	1.3052	1.32634	1.21105	0.0248344	14
126	1.21856	1.12057	1.12694	1.15214	1.14107	1.23665	1.13987	1.31657	1.40796	1.2225	1.10701	1.16637	1.32208	1.38124	1.21854	0.0270096	14
128	1.16395	1.13552	1.1275	1.13302	1.11027	1.23119	1.15318	1.32871	1.44102	1.19524	1.1157	1.1064	1.16692	1.35327	1.19728	0.0278777	14
130	1.14206	1.08686	1.11452	1.12999	1.13046	1.19404	1.1487	1.32271	1.42654	1.24247	1.11498	1.11608	1.219	1.35104	1.19568	0.0278571	14
132	1.13735	1.06599	1.12572	1.14961	1.12219	1.26334	1.18179	1.3318	1.39179	1.23204	1.11872	1.05236	1.20834	1.34011	1.19437	0.0280484	14
134	1.25206	1.18145	1.11972	1.14816	1.11572	1.22086	1.14122	1.34838	1.43228	1.18795	1.16577	1.16782	1.36012	1.26135	1.22163	0.0261394	14
136	1.13752	1.03358	1.11958	1.14165	1.11959	1.19886	1.14555	1.31608	1.3726	1.20884	1.1708	1.16935	1.34596	1.2563	1.19545	0.0257011	14
138	1.15665	1.06476	1.1221	1.16941	1.11566	1.22453	1.20534	1.33032	1.42993	1.23528	1.11379	1.08653	1.33778	1.12367	1.19398	0.0287678	14
140	1.18322	1.0596	1.12131	1.1821	1.12225	1.21606	1.15796	1.35096	1.39339	1.2256	1.12033	1.15205	1.30959	1.37322	1.21197	0.0281353	14
142	1.12226	1.01153	1.12686	1.16585	1.13625	1.23926	1.1958	1.3347	1.42072	1.25164	1.12188	1.16708	1.29655	1.34978	1.21001	0.029721	14
144	1.329	1.09151	1.10471	1.16044	1.10862	1.25179	1.18497	1.31971	1.4498	1.22577	1.11458	1.124	1.35801	1.30965	1.22376	0.0305512	14
146	1.21151	1.06215	1.13086	1.16154	1.123	1.21502	1.1991	1.31654	1.42316	1.23103	1.17642	1.12167	1.33204	1.30069	1.21462	0.0264332	14
148	1.33701	1.02007	1.13042	1.21257	1.13572	1.2511	1.27108	1.34397	1.44602	1.26117	1.2496	1.10228	1.33942	1.15394	1.23245	0.0307199	14
150	1.20736	1.03106	1.134	1.23449	1.11423	1.26157	1.21156	1.34187	1.46363	1.23375	1.19375	1.13296	1.31956	1.18527	1.21893	0.028729	14
152	1.16596	1.08329	1.13186	1.18662	1.12846	1.24935	1.17902	1.36585	1.46807	1.25561	1.20217	1.13949	1.30505	1.25474	1.22254	0.0277984	14
154	1.19447	1.07388	1.13451	1.16721	1.12846	1.22938	1.21107	1.32804	1.42892	1.255	1.19375	1.11945	1.31907	1.26602	1.2178	0.025662	14
156	1.16376	1.0725	1.14044	1.17353	1.1379	1.23222	1.19295	1.36997	1.46907	1.2419	1.19558	1.11885	1.27802	1.21184	1.21418	0.0277177	14
158	1.22902	1.05775	1.14746	1.19188	1.13434	1.24762	1.16319	1.38086	1.46507	1.26683	1.18334	1.1376	1.31024	1.47041	1.24183	0.0334982	14
160	1.15231	1.10306	1.16236	1.18581	1.11363	1.22677	1.17541	1.38769	1.46836	1.28091	1.17339	1.09157	1.30502	1.44728	1.23382	0.0335192	14
162	1.02636	1.03646	1.15534	1.19527	1.12752	1.21618	1.16069	1.38831	1.50037	1.2562	1.19767	1.06488	1.29598	1.21735	1.20276	0.0349631	14
164	1.1403	1.02441	1.16187	1.19825	1.13432	1.20528	1.25652	1.36864	1.49923	1.25329	1.17473	1.04144	1.25408	1.25963	1.21228	0.0326783	14
166	1.0982	1.04213	1.15976	1.18944	1.13428	1.23681	1.27966	1.44199	1.47699	1.26153	1.1719	1.04566	1.26819	1.3123	1.22277	0.0349817	14
168	1.21373	1.03916	1.16719	1.20415	1.13869	1.23558	1.19473	1.36857	1.47989	1.26803	1.1743	1.08516	1.32286	1.36623	1.23273	0.0318966	14
170	1.09519	1.03735	1.15221	1.19134	1.13596	1.18105	1.22645	1.42396	1.47151	1.27325	1.11566	1.03011	1.3125	1.54794	1.22818	0.0427604	14
172	1.17669	1.10845	1.17535	1.25524	1.10954	1.25235	1.16891	1.4098	1.47358	1.27948	1.14127	1.00884	1.27723	1.52316	1.23999	0.0390583	14
174	1.18857	1.11584	1.15867	1.20424	1.14621	1.24405	1.16461	1.373	1.45977	1.24936	1.22653	1.03612	1.27589	1.50423	1.23908	0.0347178	14
176	1.14897	1.05254	1.17012	1.16769	1.12517	1.21706	1.17813	1.37227	1.48235	1.27776	1.22265	1.06797	1.33598	1.44883	1.23339	0.035614	14
178	1.14463	1.10578	1.17243	1.20493	1.12951	1.22226	1.17422	1.35901	1.49535	1.2269	1.14644	1.0793	1.31982	1.45775	1.23131	0.0344982	14
180	1.11314	1.09233	1.16856	1.16732	1.14034	1.2362	1.21368	1.37942	1.48511	1.26548	1.22119	1.04318	1.33838	1.45327	1.23697	0.0357966	14
182	1.1407	1.07601	1.17467	1.20256	1.1135	1.24791	1.18789	1.37925	1.44083	1.23612	1.23577	1.07795	1.33169	1.47806	1.23735	0.0341457	14
184	1.19671	1.13403	1.16366	1.13664	1.10712	1.19436	1.15593	1.38963	1.45607	1.23999	1.13644	1.02747	1.30941	1.31588	1.21167	0.0315121	14		Recovery: 5 minutes
186	1.21854	0.966425	1.16425	1.111	1.10301	1.20015	1.16039	1.3191	1.41306	1.24996	1.12309	1.06554	1.29536	1.30618	1.19258	0.0315134	14
188	1.12434	1.02235	1.11877	1.1404	1.08506	1.16168	1.19694	1.29464	1.42148	1.17928	1.09493	1.01561	1.29323	1.17165	1.16574	0.0295261	14
190	1.18108	0.987455	1.14392	1.11453	1.0811	1.22767	1.15085	1.31071	1.37658	1.19671	1.11386	1.00461	1.28229	1.27345	1.17463	0.0301557	14
192	1.07899	1.01099	1.15558	1.06182	1.08591	1.1758	1.15624	1.28533	1.42287	1.17607	1.14641	1.02061	1.29787	1.21748	1.16371	0.0306505	14
194	1.1424	0.971068	1.1452	1.07906	1.05418	1.22239	1.12043	1.28939	1.42529	1.16725	1.11028	0.981834	1.25787	1.28035	1.1605	0.0335515	14
196	1.05794	0.971948	1.13649	1.10406	1.04431	1.20754	1.12891	1.26084	1.39665	1.19577	1.20839	1.00638	1.26916	1.09651	1.14892	0.030893	14
198	1.06993	0.905004	1.13154	1.13723	1.03574	1.20494	1.13544	1.24719	1.35729	1.16077	1.10238	0.985481	1.2647	1.14923	1.13478	0.0310087	14
200	1.16825	0.915585	1.13241	1.04907	1.05576	1.19279	1.13362	1.27124	1.37212	1.16381	1.08172	0.990201	1.26446	1.09125	1.13445	0.0318265	14
202	1.05592	0.941061	1.13211	1.08627	1.05581	1.09131	1.14929	1.25842	1.39177	1.19853	1.08133	0.979993	1.2715	1.27379	1.14051	0.0334968	14
204	0.988892	0.84197	1.13198	1.03321	1.07167	1.13082	1.08531	1.22454	1.261	1.1179	1.08959	0.980077	1.20743	1.1091	1.09096	0.0290035	14
206	1.00681	0.908036	1.12572	1.11109	1.05392	1.13126	1.06613	1.23114	1.2635	1.14694	1.13784	0.977121	1.23803	1.144	1.11011	0.0270112	14
208	1.13347	0.879138	1.11759	1.0467	1.039	1.1279	1.02519	1.2228	1.36286	1.18487	1.06588	0.984543	1.2189	1.14907	1.11128	0.0317775	14
210	1.14239	0.798625	1.11804	1.04261	1.02731	1.14281	1.06498	1.19608	1.20217	1.16668	1.08407	0.976747	1.19941	1.21737	1.09852	0.0303617	14
212	1.01547	0.83338	1.118	1.04393	1.03171	1.1137	1.08527	1.1881	1.32013	1.10794	1.10448	0.971126	1.21085	1.05728	1.08581	0.0306496	14
214	1.02361	0.811158	1.12053	1.06791	1.03677	1.10099	1.06366	1.17497	1.29453	1.20091	1.07216	0.969763	1.19326	1.10429	1.08818	0.0309358	14
216	0.998198	0.839446	1.12003	1.0363	1.03706	1.0844	1.06359	1.17309	1.28593	1.18038	1.06903	0.992303	1.17882	1.14316	1.08584	0.028941	14
218	1.01518	0.803558	1.12033	1.01119	1.01684	1.09932	1.05833	1.17766	1.18891	1.19236	1.0622	1.01935	1.16244	1.21286	1.08147	0.0291125	14
220	1.1084	0.869609	1.11153	1.01824	1.02885	1.12004	1.07079	1.17894	1.26329	1.16235	1.11474	0.979909	1.17535	1.16759	1.09783	0.0265079	14
222	1.1177	0.778456	1.10502	0.993901	1.01282	1.05459	1.08465	1.18112	1.19694	1.14784	1.05578	1.02658	1.16159	1.17609	1.07808	0.0290274	14
224	0.853569	0.770237	1.09982	1.02133	1.00829	1.0513	1.03083	1.19941	1.07515	1.1644	1.09283	1.04073	1.18049	1.07166	1.04715	0.0312393	14
226	1.16564	0.816733	1.09567	1.00785	1.01007	1.11941	1	1.17669	1.08185	1.19262	1.1001	0.97617	1.16494	1.1574	1.07608	0.0278487	14
228	1.0379	0.830102	1.09035	1.02019	1.01238	1.10166	1.01543	1.16791	1.243	1.17791	1.09938	1.02338	1.17492	1.09605	1.0779	0.0271126	14
230	0.944515	0.791303	1.09181	1.03019	1.01756	1.12807	1.106	1.15321	1.2344	1.16405	1.10449	1.05621	1.15746	1.16242	1.08155	0.0297789	14
232	1.04134	0.836235	1.08421	1.05921	1.00089	1.09281	1.04645	1.14124	1.10092	1.1703	1.1024	1.03093	1.13133	1.02156	1.06142	0.021659	14
234	0.933169	0.766733	1.08115	1.02222	0.998185	1.15117	1.10024	1.15009	1.20695	1.15954	1.10369	0.995953	1.1429	1.02393	1.05971	0.0306989	14
236	0.93515	0.8176	1.07891	1.05861	0.992069	1.07582	1.02502	1.1618	1.21399	1.12772	1.08693	1.01922	1.06972	1.14409	1.05762	0.0266161	14
238	0.927059	0.76462	1.08105	1.04297	0.992859	1.12543	1.06371	1.16523	1.22232	1.12476	1.08955	1.02157	1.14704	0.959468	1.05197	0.0310268	14
240	1.00537	0.763712	1.07884	1.0147	0.999518	1.07729	0.990478	1.12676	1.20606	1.14498	1.06985	0.994468	1.13933	0.972416	1.0417	0.0285788	14
242	1.04307	0.823979	1.07695	1.02617	0.997279	1.0872	1.05659	1.12482	1.19366	1.11827	1.07111	0.930498	1.08901	1.08477	1.05167	0.0240135	14
244	1.02567	0.761174	1.07247	1.04891	0.997308	1.06783	1.08279	1.11841	1.19362	1.16452	1.08045	0.984259	1.10415	1.0506	1.05373	0.0272451	14
246	0.967247	0.800013	1.06983	1.04512	0.977021	1.11052	1.02593	1.14244	1.19859	1.11333	1.08293	0.97029	1.08269	1.07507	1.04722	0.0259953	14
248	0.918191	0.698639	1.07338	1.04264	0.992963	1.00812	1.02219	1.11167	1.23835	1.12586	1.08107	0.994495	1.11339	1.15126	1.04087	0.0339192	14
250	1.05358	0.758037	1.0677	1.03708	0.982282	1.10177	1.03859	1.12031	1.19221	1.15643	1.06204	1.00882	1.10821	1.028	1.05108	0.0272676	14
252	0.975318	0.731447	1.05496	1.04598	0.977494	1.09385	1.03311	1.10305	1.2068	1.14184	1.05795	0.969013	1.12735	1.13301	1.04651	0.0305372	14
254	1.00603	0.716327	1.05815	1.03416	0.982386	1.12762	0.951127	1.11437	1.17402	1.15203	1.05749	0.931829	1.10774	1.02516	1.03132	0.0311835	14
256	1.03882	0.799719	1.05875	1.05584	0.997825	1.09077	1.05292	1.0797	1.18518	1.10875	1.04302	0.936699	1.10089	1.14875	1.04983	0.0251481	14
258	1.12453	0.720238	1.06145	1.02415	0.977231	1.10021	0.961398	1.1343	1.04558	1.12866	1.05259	0.961234	1.108	1.08012	1.03426	0.0289718	14
260	1.03743	0.767443	1.05244	1.03249	0.965399	0.980915	1.03928	1.10997	1.21518	1.14518	1.05472	0.944305	1.11924	0.979964	1.03171	0.028565	14
262	1.09882	0.70296	1.05685	1.01931	0.963519	1.10529	1.04531	1.09579	1.22762	1.13534	1.06339	0.968077	1.08118	1.03244	1.04256	0.0316829	14
264	1.05272	0.72503	1.05885	1.01731	0.961521	1.10901	1.0691	1.10486	1.2034	1.17416	1.06098	0.977653	1.10961	1.07335	1.04983	0.0305485	14
266	1.00096	0.69685	1.04933	0.973186	0.958797	0.968566	1.03366	1.13395	1.19043	1.12686	1.06826	0.97853	1.10154	0.963691	1.01747	0.0315923	14
268	1.08223	0.761518	1.05148	0.995777	0.960039	0.985454	1.02047	1.16004	1.18504	1.18266	1.03653	0.93409	1.12743	1.02498	1.03627	0.0301897	14
270	1.1846	0.726558	1.04813	0.974903	0.967527	1.12986	1.01965	1.11301	1.16152	1.11881	1.05139	0.924589	1.10122	1.0417	1.04025	0.0315103	14
272	1.08206	0.691589	1.05572	0.976122	0.946938	1.10863	1.08194	1.12441	1.18539	1.15095	1.05913	1.02557	1.11745	1.04567	1.04654	0.0322419	14
274	1.08004	0.645945	1.05897	0.966563	0.971197	1.11009	1.06374	1.10597	1.16334	1.17152	1.06283	1.01125	1.09184	1.12882	1.04515	0.0348672	14
276	1.04785	0.657302	1.04487	0.982863	0.971811	1.1058	0.986816	1.12105	1.02366	1.15851	1.07139	0.891171	1.07958	1.02045	1.01165	0.0328441	14
278	1.01358	0.66907	1.05061	0.992288	0.958914	1.11478	1.04166	1.09395	1.19261	1.13417	1.06517	0.930925	1.10465	1.1531	1.03682	0.0345518	14
280	1.06569	0.649241	1.04756	0.991571	0.961484	1.14625	1.00308	1.11249	1.0655	1.16312	1.02626	0.938461	1.03296	1.13664	1.02431	0.0341358	14
282	0.960331	0.704245	1.04933	0.992877	0.942911	1.11199	1.03443	1.09867	1.18789	1.14955	1.03517	1.06077	1.10555	1.16944	1.04308	0.0327087	14
284	1.12803	0.675996	1.05448	0.993967	0.951872	1.12835	0.992991	1.13521	1.21873	1.14159	1.06648	0.970903	1.09618	1.12478	1.04854	0.0352765	14
286	1.07496	0.711275	1.04833	1.00555	0.9387	1.06911	1.03968	1.09521	1.19991	1.16925	1.03962	0.940366	1.08465	0.957774	1.02674	0.0317263	14
288	1.06173	0.69318	1.0512	1.00524	0.942209	1.04568	1.01846	1.09398	1.17565	1.10654	1.05027	0.934699	1.0901	1.11227	1.02723	0.0309675	14
290	1.05446	0.698975	1.0551	0.993916	0.935141	1.13192	0.951416	1.08666	1.19037	1.12475	1.07086	0.920382	1.08543	1.13338	1.03091	0.0333981	14
292	1.06207	0.665664	1.0494	0.978072	0.928095	1.11457	1.04261	1.08495	1.17295	1.15284	1.0757	0.929774	1.0914	1.12548	1.03383	0.034601	14
294	1.11327	0.637905	1.05377	1.00313	0.937347	1.13284	0.996114	1.07323	1.17688	1.07647	1.0601	0.906485	0.932898	1.11297	1.01524	0.0361085	14
296	1.07294	0.658647	1.04645	0.99164	0.949563	1.09522	1.02474	1.12654	1.14352	1.17211	1.04956	0.967552	1.08264	1.07639	1.03268	0.0334588	14
298	1.07729	0.640487	1.04211	1.00428	0.954226	1.03025	1.03524	1.18648	1.13058	1.1712	1.06372	1.01867	1.08924	1.05378	1.03554	0.0347664	14
300	1.05615	0.678189	1.04829	0.952409	0.964312	1.11536	1.01477	1.1123	1.13149	1.13629	1.09199	0.972288	1.08307	1.04581	1.02877	0.0315561	14
302	1.09223	0.63788	1.04938	0.932672	0.943965	1.04812	1.03083	1.09924	1.12867	1.06482	1.0275	0.976649	1.08513	1.13409	1.01794	0.0336142	14
304	1.07787	0.657188	1.05822	0.979428	0.947027	0.966306	1.0013	1.12434	1.1701	1.15472	1.00829	0.982964	1.0379	1.17717	1.02449	0.0351186	14
306	1.09304	0.668734	1.06034	0.944033	0.930876	1.03961	0.989512	1.09265	1.15075	1.10458	1.01467	0.882362	1.05749	1.05028	1.00564	0.0325907	14
308	1.20481	0.700883	1.05867	0.948686	0.94279	1.12899	0.996257	1.09154	1.14387	1.02154	1.01298	0.912645	1.08683	1.06533	1.02256	0.0331037	14
310	1.00592	0.66116	1.05831	0.944448	0.938054	0.918308	0.987072	1.07305	1.14645	0.998705	1.00225	0.934601	1.12439	1.00855	0.985805	0.0310798	14
312	1.05513	0.686721	1.05954	0.951121	0.984664	1.12664	1.02771	1.0792	1.17105	1.09542	1.01468	0.926135	1.08646	1.05828	1.02305	0.0312642	14
314	1.06438	0.700322	1.05597	0.955979	0.924061	1.11712	1.04592	1.11899	1.17473	1.14338	1.00225	0.906368	1.12432	1.10759	1.03153	0.0337859	14
316	1.05894	0.684561	1.05329	0.936589	0.945838	1.1311	0.998498	1.11252	1.16961	1.1298	1.02239	0.913397	1.11994	1.04787	1.02317	0.0335942	14
318	1.11463	0.640346	1.05355	0.954103	0.934868	1.00033	1.04085	1.23467	1.1485	1.12934	1.01135	0.891958	1.03273	1.17039	1.02554	0.0392229	14
320	1.04555	0.555778	1.0467	0.94284	0.936574	1.1007	1.05704	1.10811	1.13615	1.12995	1.00989	0.946237	1.07242	1.13716	1.01608	0.0401104	14
322	1.13347	0.708025	1.04192	0.963866	0.92242	1.08054	1.01443	1.03529	1.15566	1.16137	1.00527	0.927307	1.19413	1.04902	1.02805	0.0335405	14
324	1.21275	0.613321	1.05855	0.946353	0.923682	1.13934	1.04666	1.05968	1.15413	1.09803	1.00927	0.875104	1.22373	0.992099	1.02519	0.0420851	14
326	1.08523	0.627416	1.05878	0.94114	0.944798	1.00913	1.03103	1.05306	1.15805	1.07463	1.01308	0.93712	1.0849	0.994038	1.00089	0.0333	14
328	1.02095	0.647762	1.05558	0.923297	0.95388	1.11721	1.02651	1.04161	1.16039	1.12069	1.00462	0.972375	1.08554	1.08946	1.01571	0.0335391	14
330	1.15333	0.635189	1.05605	0.915403	0.926923	1.09037	1.02406	1.04053	1.13993	1.12598	0.994471	0.925877	1.07433	1.02998	1.00946	0.035454	14
332	1.02152	0.632026	1.04867	0.953894	0.937232	1.127	1.04371	1.09981	1.14176	1.13488	1.01224	0.929178	1.20402	0.952272	1.01702	0.0374758	14
334	1.07884	0.603331	1.05009	0.971535	0.934427	1.1093	1.00394	1.00051	1.15202	1.12948	1.02105	0.985731	1.16161	0.977558	1.01282	0.036913	14
336	0.970176	0.643935	1.05291	0.932046	0.948026	1.11577	1.04679	1.09879	1.17007	1.10997	1.01454	0.925381	1.21788	1.02246	1.0192	0.0372663	14
338	1.1109	0.652477	1.06393	0.927046	0.924886	1.13818	1.04075	1.0973	1.2155	1.1088	1.00928	0.955737	1.09042	1.07358	1.0292	0.0363378	14
340	1.06506	0.622509	1.05508	0.953474	0.949314	1.10694	0.98957	1.06792	1.16373	1.03309	0.99295	0.908141	1.18492	1.0032	1.00685	0.0363585	14
342	1.05201	0.646214	1.0623	0.965638	0.922266	1.10362	1.05225	1.0901	1.165	1.08029	1.01636	0.836865	1.04843	1.12145	1.01163	0.0360336	14
344	1.1031	0.634343	1.05931	0.962058	0.926424	1.12641	1.07453	1.08817	1.17054	1.08168	1.01175	0.986422	1.11223	1.04171	1.02705	0.0350967	14
346	1.06385	0.651958	1.04664	0.924486	0.950263	1.15389	0.945155	1.0382	1.17099	1.06991	1.04798	0.974787	1.12032	1.07578	1.01673	0.0345358	14
348	1.02003	0.636056	1.04798	0.944558	0.938926	1.1481	1.01526	1.02625	1.16225	1.02096	1.01153	0.923872	1.07358	0.956035	0.994671	0.0335174	14
350	1.07634	0.627028	1.04597	0.942742	0.921969	1.13502	0.976987	1.01827	1.2052	1.06033	1.00815	0.917275	1.09011	1.10176	1.00908	0.0367265	14
352	1.05964	0.595659	1.05676	0.92	0.915288	1.15869	1.025	1.06859	1.16627	1.01955	1.0304	0.887907	1.05406	1.0718	1.00212	0.0380781	14
354	1.15163	0.632358	1.04727	0.913665	0.931768	1.14724	1.05988	1.03021	1.2028	1.06784	1.04926	0.922339	1.09556	1.09965	1.0251	0.038021	14
356	1.00701	0.711622	1.05354	0.913587	0.918059	1.147	1.0835	1.05827	1.21989	1.06037	1.03489	0.908845	1.0552	1.14228	1.02243	0.0339684	14
358	1.04431	0.650593	1.05913	0.928746	0.902059	0.949234	0.987363	1.11445	1.17745	1.05854	1.04374	0.932241	1.08524	1.23885	1.01228	0.0379177	14
360	1.08797	0.595097	1.05927	0.93525	0.919712	1.1452	1.01984	1.04773	1.2257	1.1164	1.03172	0.925343	1.08828	1.01528	1.0152	0.0396033	14
362	1.10701	0.573848	1.05048	0.903752	0.914212	1.14292	0.991404	1.13866	1.20324	1.05964	1.02577	0.91455	1.08812	1.09187	1.01468	0.0417985	14
364	1.15758	0.612814	1.05513	0.903194	0.93161	1.16043	1.04707	1.11851	1.22391	1.07499	1.00959	0.928991	1.11869	1.11409	1.03261	0.0410665	14
366	1.01921	0.631761	1.04252	0.895629	0.902021	1.11721	0.985186	1.06827	1.22603	1.08464	0.997844	0.903369	1.03272	1.11338	1.00141	0.0376787	14
368	0.990856	0.730512	1.05653	0.895563	0.898738	1.16275	1.03305	1.09139	1.16799	1.0975	1.01758	0.900612	1.05461	1.08896	1.01333	0.0322522	14
370	1.01562	0.658318	1.04766	0.921326	0.901903	1.06003	1.01323	1.04416	1.21042	1.08728	1.02838	0.896967	1.05922	1.12889	1.00524	0.035071	14
372	1.08634	0.614804	1.05401	0.921533	0.914471	1.16431	1.02012	1.07589	1.18455	1.03761	1.02564	0.907232	1.06316	1.07245	1.01015	0.0376446	14
374	1.11404	0.633117	1.05283	0.903337	0.911211	1.15159	1.07524	1.09937	1.16945	1.07946	1.01222	0.880756	1.07728	1.03345	1.01381	0.0377932	14
376	1.01937	0.581282	1.04449	0.903028	0.902725	1.1355	1.0641	1.0674	1.15525	1.05661	1.01333	0.884916	1.09167	1.13495	1.0039	0.0399648	14
378	1.06504	0.630825	1.02919	0.898889	0.920877	1.02316	1.08325	1.10384	1.15295	1.07978	1.00505	0.910788	1.08565	1.08867	1.00557	0.0354417	14
380	1.10388	0.58422	1.03838	0.896465	0.899596	0.967629	1.10684	1.08814	1.1607	1.07324	1.01549	0.931509	1.05625	0.902279	0.987473	0.0387161	14
382	1.0617	0.621398	1.04737	0.932377	0.921688	1.1714	1.02042	1.07054	1.17293	1.07831	1.00873	0.92722	1.08033	0.85005	0.997461	0.0381669	14
384	0.936538	0.594702	1.05033	0.890097	0.914362	1.16487	1.0657	1.12598	1.16802	1.10801	0.985798	0.885849	1.01143	1.02157	0.994518	0.0399803	14
386	1.10789	0.578755	1.0547	0.898633	0.902213	1.17703	1.04877	0.999041	1.17657	1.08984	1.03359	0.899039	1.0639	1.01218	1.00301	0.040621	14
388	1.04142	0.611777	1.04793	0.888107	0.929657	1.14644	1.12577	1.07498	1.16712	1.05825	1.00801	0.88147	1.05313	1.09291	1.00907	0.0385751	14
390	1.1028	0.582233	1.0476	0.913429	0.921294	1.17843	1.08122	1.0633	1.17637	1.07202	1.02267	0.922527	1.0133	0.970624	1.00484	0.0397113	14
392	1.08474	0.553683	1.04369	0.892113	0.926779	1.18582	1.04106	0.997682	1.17033	1.1002	1.00936	0.913713	1.07966	0.963326	0.997297	0.0416475	14
394	1.02347	0.565376	1.03334	0.895728	0.922869	1.15843	1.06535	1.064	1.16776	1.01697	1.00562	0.917696	1.07233	0.833214	0.981582	0.0408956	14
396	1.08217	0.556826	1.04433	0.903803	0.925946	1.15238	1.04228	1.0389	1.1597	1.04933	1.01324	0.898189	1.0594	0.954513	0.991501	0.0398792	14
398	1.07466	0.603299	1.04838	0.91594	0.929549	1.17334	1.05051	1.09847	1.14215	1.10094	1.01083	0.905112	1.08876	0.799039	0.995784	0.0410802	14
400	1.00891	0.584878	1.0473	0.879024	0.93165	1.1499	1.04059	1.00202	1.1428	1.08154	1.00845	0.871471	1.02789	0.80838	0.970343	0.0397026	14
402	1.00973	0.572261	1.04161	0.910816	0.914856	1.09907	1.09745	0.99206	1.15793	1.08496	1.02437	0.886709	1.05382	0.973472	0.987079	0.0382457	14
404	0.934145	0.624	1.05321	0.884994	0.938502	1.18058	1.1438	1.00365	1.15796	1.10053	1.00444	0.924506	1.0576	0.950412	0.997024	0.0381787	14
406	0.982316	0.636574	1.05273	0.920714	0.919467	1.16506	1.0664	1.12078	1.14138	1.04398	0.996581	0.918214	1.02374	0.923726	0.993689	0.035443	14
408	0.978416	0.586249	1.05219	0.897319	0.890301	1.1782	1.07944	1.03539	1.1659	1.07805	0.989959	0.898023	1.04836	0.944422	0.987302	0.0394721	14
410	1.116	0.598351	1.05943	0.895004	0.911492	1.1536	1.076	1.09386	1.17985	0.963184	1.00311	0.936955	1.06339	0.95435	1.00033	0.0391624	14
412	1.00631	0.565001	1.0593	0.889745	0.886727	1.17741	1.0959	1.13225	1.17538	1.07147	1.0049	0.978847	1.06686	0.847556	0.996975	0.0432119	14
414	1.02119	0.584938	1.05144	0.903406	0.885658	1.16426	1.08573	1.04611	1.18816	1.08181	1.00958	0.907575	1.08106	0.974401	0.998951	0.0400669	14
416	0.989108	0.537898	1.04697	0.887947	0.904667	1.15787	1.07267	1.07757	1.19641	1.08389	0.998759	0.844837	1.04032	0.951068	0.984999	0.0434936	14
418	0.954055	0.634637	1.03583	0.875901	0.897743	1.16841	1.0538	1.08119	1.21534	1.0876	0.991714	0.91584	1.03996	1.12723	1.00566	0.0391615	14
420	1.04072	0.569765	1.04621	0.885652	0.896351	1.15927	1.10485	1.02547	1.18641	1.09199	0.993682	0.890979	1.02962	1.01946	0.995746	0.0409949	14
422	0.997707	0.605864	1.0529	0.863018	0.893831	1.15118	1.04305	1.08198	1.19182	1.06367	1.00287	0.975174	1.08212	1.07861	1.00599	0.0387657	14
424	0.881221	0.600003	1.04733	0.871575	0.878457	1.16627	1.07088	1.11488	1.17723	1.09235	0.993996	0.895762	1.04921	1.0145	0.989547	0.040965	14
426	1.04374	0.573828	1.04777	0.881525	0.887216	1.1883	1.06251	1.11047	1.16265	1.10495	0.998405	0.916471	1.04746	1.02018	1.00325	0.0413444	14
428	0.931972	0.630002	1.04542	0.893704	0.881792	1.17038	1.08598	1.12165	1.1581	1.08617	0.986002	0.894229	1.05314	0.84953	0.984862	0.0396512	14
430	0.969419	0.553034	1.04146	0.880777	0.849603	1.06495	1.04899	1.04936	1.18119	1.05326	1.00348	0.875594	1.06557	0.913419	0.967865	0.0403838	14
432	0.963285	0.57667	1.0447	0.870724	0.889988	1.16091	1.10096	1.08732	1.11375	1.05491	0.993075	0.878357	1.06621	1.07482	0.991121	0.0402437	14
434	0.915964	0.527169	1.04505	0.886239	0.878553	1.16421	1.13539	1.09236	1.19483	1.05661	0.989393	0.890696	1.05933	1.07259	0.993456	0.0454278	14
436	1.02677	0.589374	1.04347	0.892754	0.885161	1.16717	1.10658	1.07553	1.22322	1.04992	0.994564	0.859489	1.03898	0.982109	0.995363	0.0415727	14
438	0.990414	0.533053	1.0516	0.878886	0.865403	1.14484	1.09932	1.00413	1.20097	1.01579	0.98554	0.922903	1.04648	1.0802	0.987109	0.0430624	14
440	0.872948	0.498909	1.04381	0.859597	0.900061	0.865622	1.10936	1.0439	1.19652	0.955078	0.97062	0.928155	1.03027	0.968534	0.945956	0.0431249	14
442	0.916202	0.495189	1.02714	0.8679	0.909599	1.16639	0.999594	1.0514	1.20856	1.10949	1.02929	0.920571	1.06173	1.04077	0.985988	0.0459288	14
444	0.902789	0.563051	1.04682	0.866856	0.905278	1.13928	1.10249	1.05941	1.1855	1.08146	0.992823	0.899686	1.0633	1.10777	0.994037	0.0425157	14
446	0.99023	0.538715	1.04842	0.863522	0.88205	1.1584	1.09894	1.0377	1.2082	1.03385	0.97922	0.890612	1.07724	1.01438	0.987248	0.043529	14
448	1.05217	0.496785	1.04876	0.873194	0.85951	1.17681	1.09526	1.01397	1.22538	1.09066	0.991136	0.904717	1.04936	1.07879	0.996893	0.0475416	14
450	1.01534	0.579507	1.03834	0.887726	0.887736	1.14909	1.04001	1.09345	1.20417	1.03853	0.999639	0.894662	1.0751	1.00392	0.993374	0.0403009	14
452	0.977283	0.558803	1.03949	0.873192	0.872545	1.16192	1.07748	1.10524	1.18316	1.06993	0.996576	0.882305	1.03461	0.889855	0.980171	0.0427412	14
454	0.986678	0.504197	1.04626	0.86912	0.82662	1.15258	0.983645	1.03039	1.21056	0.980189	0.980744	0.887273	1.02258	1.0074	0.963446	0.0444419	14
456	0.984285	0.544979	1.03298	0.883006	0.892826	1.157	1.0557	1.09154	1.21832	1.01332	1.03238	0.898506	1.05684	0.949506	0.986513	0.0427173	14
458	1.00484	0.533695	1.04621	0.887648	0.911309	1.16718	1.159	1.07861	1.1988	1.05863	1.00362	0.89196	1.03398	0.961892	0.995526	0.0442562	14
460	1.02269	0.52931	1.05137	0.863387	0.895264	1.15418	1.03802	1.11468	1.19666	1.02824	1.01441	0.878914	1.04527	0.968755	0.985796	0.04368	14
462	0.916192	0.555199	1.04197	0.883515	0.904539	1.11584	1.08326	1.17017	1.18114	0.9636	0.996124	0.875395	1.04771	1.1178	0.98946	0.0434057	14
464	0.981037	0.561082	1.05373	0.856592	0.869998	1.16051	1.12205	1.09762	1.21287	0.954804	1.00371	0.917962	1.05494	1.02128	0.990584	0.0432143	14
466	0.95176	0.533509	1.05229	0.864433	0.860123	1.1816	0.974905	1.10251	1.21654	1.02532	0.982017	0.827251	1.07189	1.07744	0.980113	0.0461758	14
468	0.955935	0.55091	1.05579	0.863058	0.876031	1.1936	1.07836	1.02629	1.20918	0.934511	0.996346	0.907187	1.04922	1.03163	0.980574	0.0432207	14
470	0.849876	0.484869	1.05214	0.861237	0.834649	1.11161	0.954761	0.963025	1.20246	0.990211	1.00626	0.906791	1.04825	1.01048	0.94833	0.0449637	14
472	0.959121	0.556595	1.05142	0.846276	0.869058	1.17332	0.998798	1.00936	1.20716	0.989324	0.985422	0.861207	1.04068	1.15309	0.97863	0.0440423	14
474	0.984982	0.483791	1.0551	0.857261	0.906021	1.13159	1.05824	1.09786	1.18732	0.887747	0.977273	0.910014	1.04982	0.963645	0.967905	0.0453867	14
476	0.960991	0.509918	1.0502	0.860703	0.866269	1.12672	1.06004	1.01331	1.21078	0.980532	1.03517	0.90859	1.04231	1.01981	0.974667	0.0437868	14
478	0.936688	0.507603	1.05081	0.867244	0.860706	1.1617	1.01682	1.05957	1.17255	1.04086	0.990407	0.897802	0.993812	0.964241	0.965772	0.0434086	14
480	0.901696	0.531364	1.04926	0.874281	0.860326	1.09651	0.998251	1.03685	1.16192	1.03825	1.05437	0.913245	1.04203	1.02352	0.970134	0.0409834	14
482	0.810283	0.509615	1.05022	0.869285	0.85744	1.22648	1.02737	1.08232	1.19203	1.06437	1.00261	0.832813	1.04088	1.10165	0.976242	0.0496307	14

## Sheet: Mito-Lysosomes Contacts
2 independent experiments in HeLa
200310_OptoContacts
191204_Optogenetics
Protocol: 1 minute dark (30 frames)/ 2 minutes ON (60 frames)/5 minutes OFF (150 frames) 5 min recovery
See Material and Methods for detals on analysis
time (s)	Cell1	Cell2	Cell3	Cell4	Cell5	Cell6	Cell7	Cell8	Cell9	Cell10	Cell11	Cell12	Cell13	Cell14	Cell15	Cell16	Cell17	Average	ES	N
0	1	1	1	1	1	1	1	1	1	1	1	1	1	1	1	1	1	1	0	17		Pre-excitation: 1 minute
2	0.911384	0.877619	0.966215	0.937437	0.972429	1.13752	0.955111	0.971154	0.996928	0.959302	0.946866	0.981572	0.839597	1.01887	1.00309	1.00748	0.948719	0.966547	0.0154574	17
4	1.14575	0.693363	0.83139	0.98934	0.898626	1.10735	0.907206	1.01154	0.976381	1.03678	0.931621	0.914786	0.906826	0.926698	1.08274	0.872083	0.990572	0.954297	0.026433	17
6	0.91871	0.735837	1.02968	1.05446	0.987638	1.03066	1.04974	1.07315	0.911251	0.970456	1.13182	0.901492	0.92804	1.22499	0.977982	1.80561	1.13102	1.05074	0.054357	17
8	0.96948	0.797037	0.843376	0.929706	1.01357	1.14902	1.03125	1.15596	1.05335	1.17902	1.06316	0.870964	1.0098	0.944055	1.15368	1.22563	1.17259	1.03304	0.031143	17
10	0.951237	0.812	1.02326	0.992857	1.05394	1.35018	1.06114	1.02154	1.08614	0.958212	1.00252	0.867814	0.990494	0.764178	1.19528	1.01803	1.24729	1.0233	0.035396	17
12	0.928066	0.881016	0.907374	0.979403	1.09312	1.28929	1.28901	1.12462	0.795516	1.00306	1.01272	1.02703	0.947217	0.854586	1.08355	1.01433	1.02379	1.01492	0.032673	17
14	0.924041	0.84868	0.970633	0.934216	0.946125	1.12758	1.00082	1.03368	0.895516	1.06417	1.02255	0.923397	0.736358	0.782601	0.962181	0.891699	0.900354	0.939094	0.0236689	17
16	0.974758	0.87634	0.867617	0.990265	0.977223	1.21076	1.08061	1.14852	0.876382	1.08194	0.936095	0.919772	0.796621	0.834302	0.996237	0.989378	1.22042	0.986896	0.0305689	17
18	1.13208	0.85668	0.952779	0.867968	0.941562	1.44214	0.863937	1.08321	0.849325	1.16318	0.819933	1.03151	0.775975	0.944566	1.00695	1.02943	1.22287	0.999065	0.0415049	17
20	1.06111	0.879532	0.9864	0.954304	0.961603	1.57157	0.941451	0.938078	0.838978	1.07273	0.753827	1.00179	0.831644	0.859975	1.18316	1.04418	1.09583	0.998598	0.0445721	17
22	1.01582	1.02404	0.904612	0.952769	1.04653	1.31807	1.13692	0.966023	0.828282	1.1691	0.913225	0.858133	0.908911	0.863389	1.28365	1.28355	1.09691	1.03353	0.0383115	17
24	1.02502	0.985971	0.921735	0.920346	0.892112	1.16027	1.10109	1.18506	0.875478	1.30158	0.949634	0.876088	0.980757	0.906831	0.99684	1.11882	1.30327	1.02947	0.0342904	17
26	0.948429	1.00905	0.919619	0.874465	0.924702	1.1194	1.1532	1.16848	0.786426	1.10207	0.861055	0.880618	0.960941	1.28493	0.939838	1.11108	1.17929	1.01315	0.0339879	17
28	0.867902	0.914152	0.991532	0.849088	0.92453	1.11729	1.12864	1.08782	0.852775	1.0102	0.911218	0.928994	0.951178	0.87691	0.774466	1.0814	1.24908	0.971598	0.0302827	17
30	0.92013	0.882267	0.936504	0.884266	0.860364	1.06363	1.47093	1.30698	0.769361	1.06506	1.04652	1.04403	0.909146	0.91781	0.858173	1.05466	1.34149	1.01949	0.0464561	17
32	0.871669	0.995627	0.859375	1.01685	0.960901	1.06815	1.11368	1.24715	0.734059	1.15621	0.903205	0.971536	0.792734	0.962821	0.823874	1.02948	1.29558	0.988407	0.0375416	17
34	0.76976	0.896723	0.752431	1.12581	0.935713	1.09464	1.20314	1.16624	0.748076	1.00621	0.856756	1.0455	0.783866	0.884318	0.802612	1.01302	1.25379	0.961094	0.0405289	17
36	0.839881	0.922732	0.739581	1.05072	0.871974	1.22824	1.22004	1.19904	0.722759	1.08618	0.810682	1.0841	0.750733	0.838067	0.855415	1.16512	1.2181	0.976669	0.0453972	17
38	0.857498	1.02	0.897242	1.13444	0.888111	1.07207	1.22284	1.15859	0.755372	1.03465	0.861476	1.00294	0.682579	1.04639	0.825883	1.37733	1.16487	1.00014	0.0439288	17
40	0.816134	0.999688	1.09144	1.09095	0.925727	1.11394	1.39008	1.09578	0.784896	1.05673	0.833858	1.00874	0.734633	0.939427	0.894855	1.26213	1.17531	1.01261	0.0424147	17
42	0.812726	1.0462	0.887744	0.959666	0.941684	1.14744	1.12334	1.17575	0.786545	1.19905	0.822759	1.08072	0.765741	0.787934	0.893565	1.33867	1.11243	0.993056	0.0421605	17
44	1.12325	0.992976	0.77347	0.928529	0.904916	1.13953	1.2146	1.10548	1.05889	1.05075	1.11453	1.03486	0.812999	0.948447	0.977767	1.13743	1.13087	1.02643	0.0297036	17
46	1.03355	1.11531	0.773281	0.933638	1.01158	1.13645	1.17032	1.02048	1.06487	1.08598	0.788057	1.00717	0.793825	0.861014	0.943241	1.33099	1.10454	1.01025	0.0363159	17
48	0.986042	1.1276	0.92325	1.12987	0.961926	1.06795	1.1268	1.0677	1.05938	1.00657	0.920438	1.00433	0.867998	0.875831	0.964957	1.30493	1.09663	1.02895	0.0269817	17
50	1.03339	1.23493	1.33351	0.979828	1.04105	0.995009	0.98093	1.07012	1.03782	1.01667	0.754073	1.00318	0.867971	1.11057	1.02775	1.48271	1.10376	1.06313	0.0403828	17
52	0.934467	1.26888	0.986217	0.911841	0.834749	1.13195	1.12982	0.966599	0.929275	0.988379	0.751875	0.96328	0.849465	1.00721	1.09337	1.56177	1.01841	1.01927	0.0452256	17
54	1.00554	1.35886	0.97853	0.830226	0.893364	1.27324	1.10957	0.951275	0.756424	0.994991	0.738524	0.983028	0.806151	1.25648	0.956187	1.76046	0.955171	1.03577	0.0621418	17
56	0.953995	1.3353	0.940624	0.956831	0.905089	1.14721	1.0515	1.07247	0.983943	0.974678	0.807244	0.967031	0.757278	1.19503	0.875625	1.55705	1.10481	1.03445	0.0474027	17
58	0.972287	1.23289	0.937127	1.02087	0.94865	1.26207	1.12057	0.815903	0.9271	0.99732	0.789796	1.03697	0.814934	1.2944	0.927986	1.38636	1.11192	1.03513	0.0427432	17
60	0.934221	1.19131	0.986106	0.872326	0.955885	1.19043	1.13481	1.04206	0.796019	1.00104	0.766329	0.942589	0.769647	1.05598	0.884311	1.36054	1.15489	1.00226	0.0401538	17
62	0.997082	1.24405	1.084	0.906677	0.952218	1.17707	1.08309	0.914743	0.808332	0.974897	0.700518	1.20179	0.763703	0.896723	0.855611	1.35962	1.11052	1.0018	0.0437134	17
64	1.0595	1.44909	1.20912	1.00937	0.965088	1.23311	1.06308	1.04717	0.812793	0.908865	0.847573	1.30678	1.00059	1.15375	0.966156	1.76225	1.24433	1.11992	0.0572835	17		Excitation: 2 minutes
66	1.23636	1.62203	1.41606	1.05081	1.02537	1.43044	1.19322	1.11438	1.46492	1.09503	0.926541	1.26598	0.88372	0.967223	1.04926	2.20682	1.33393	1.25189	0.0781796	17
68	1.24766	1.6822	1.47009	1.13919	1.12815	1.45088	1.27528	0.893873	1.37551	1.10619	1.04233	1.34556	0.923524	1.20213	1.01554	2.50843	1.2709	1.29867	0.0904756	17
70	1.68846	1.64073	1.24365	1.1051	1.12186	1.81378	1.30144	1.19408	1.18559	1.08967	1.09572	1.33619	1.15657	1.50433	1.02334	2.42471	1.36788	1.37018	0.0866062	17
72	1.86992	1.77446	1.49897	1.12955	1.57572	1.58712	1.2136	1.10911	0.910465	1.10477	1.08971	1.43898	0.965437	1.5275	1.08236	2.53793	1.26101	1.39274	0.0991351	17
74	1.73712	1.99265	1.77584	1.19811	1.59818	1.75857	1.34936	1.42725	0.952702	1.27435	1.08304	1.62679	0.980266	1.37479	1.05196	2.89447	1.407	1.49897	0.114255	17
76	1.93581	1.87482	1.64437	1.18588	1.57311	1.94006	1.3614	1.27514	0.959339	1.09323	1.01555	1.52252	1.07764	1.1222	1.07352	2.87344	1.22691	1.45617	0.118863	17
78	1.93723	2.15155	1.57155	1.23962	1.28573	2.26821	1.16104	1.17975	1.26305	1.4987	1.24784	1.71215	1.06434	1.28965	1.21416	2.84551	1.48707	1.55395	0.117943	17
80	1.95284	2.13061	1.88144	1.2278	1.343	1.88606	1.38393	1.19156	1.02961	1.0336	1.24212	1.56654	1.2154	1.27338	1.19169	2.95808	1.28706	1.51734	0.121389	17
82	2.05656	2.17072	1.84843	1.2708	1.27888	1.84334	1.51712	1.64032	1.02027	1.14742	1.00975	1.63206	1.43739	1.60917	1.29122	3.01369	1.58813	1.61031	0.119498	17
84	2.07069	2.28905	1.81836	1.16747	1.26187	2.03931	1.63459	1.50308	0.969738	1.19992	1.26734	1.71572	1.17518	1.99026	1.2447	3.14779	1.30607	1.63536	0.133535	17
86	2.03744	2.42398	1.86434	1.34056	1.3353	2.17177	1.3133	1.54041	1.08254	1.20861	1.36497	1.7081	1.22665	1.65577	1.29667	3.12481	1.4418	1.65512	0.128781	17
88	2.04625	2.36125	1.84678	1.48406	1.82809	2.13443	1.60849	1.53786	0.989691	1.10164	1.52957	1.61903	1.24022	1.87463	1.34438	3.2188	1.60864	1.72787	0.127671	17
90	1.92578	2.33254	2.11576	1.47265	1.45987	2.04494	1.59812	1.43849	0.974395	1.04653	1.0643	1.68056	1.41997	1.68274	1.35506	3.04523	1.37598	1.64899	0.126566	17
92	1.91529	2.37258	2.19458	1.81272	2.08548	2.303	1.58275	1.50024	0.978025	0.462945	0.501256	1.64466	1.20728	1.85706	1.32981	3.14279	1.37914	1.66292	0.16471	17
94	2.20378	2.35634	2.04488	1.87383	1.59103	2.45969	1.64053	1.67115	1.00327	1.10106	1.17378	1.74555	1.42778	1.83492	1.37999	3.21316	1.55212	1.78076	0.134842	17
96	2.18691	2.49729	2.3391	1.63457	1.82118	2.22907	1.7204	1.89975	1.14406	1.10634	1.18926	1.76181	1.25131	1.91689	1.37312	3.00402	2.04414	1.83054	0.127634	17
98	2.59391	2.44274	2.46461	1.69914	2.17998	2.17306	1.5599	1.8765	1.27938	1.0959	1.28931	1.58659	1.22853	1.85789	1.41284	3.41491	1.97492	1.89001	0.147231	17
100	2.4569	2.38952	2.19003	1.61747	1.9943	2.23219	1.52721	1.72518	1.25533	1.23276	1.11734	1.71308	1.29124	1.66592	1.44604	3.45971	1.83103	1.83207	0.142215	17
102	2.10328	2.54046	2.32128	1.76613	1.80402	2.37341	1.74625	1.84604	1.2868	1.11365	1.24298	1.86751	1.24213	2.16857	1.46142	3.40196	2.08162	1.90397	0.13985	17
104	2.15253	2.72292	2.34692	1.57627	1.53602	2.17673	1.69034	1.61387	1.33803	1.01097	1.53173	1.93676	1.29473	1.78804	1.4872	3.44669	1.86621	1.85388	0.142587	17
106	2.06354	2.53496	2.40979	1.33881	2.01719	2.2328	1.69966	1.7394	1.29283	1.0873	1.79057	1.73172	1.34381	1.62573	1.4557	3.14216	1.93431	1.84943	0.126422	17
108	2.34468	2.6223	2.55934	1.35099	2.04748	2.56816	1.86154	1.70461	1.17143	1.16281	1.8527	1.77012	1.33785	1.72989	1.55915	3.63784	1.83675	1.9481	0.154619	17
110	2.34479	2.61716	2.55446	1.45029	2.26494	2.4711	1.88875	1.75722	1.23481	1.15753	1.99255	1.86987	1.50939	1.91549	1.55948	3.71337	1.78099	2.00483	0.151101	17
112	2.40238	2.58691	2.24992	1.43839	2.19212	2.44156	1.69061	1.5857	1.2214	1.26678	2.13405	1.95907	1.66028	1.90381	1.51632	3.7507	1.6443	1.97908	0.149627	17
114	2.54177	2.71782	2.00311	1.68874	1.81339	2.6403	1.79147	1.63156	1.14596	1.21045	1.40163	1.82268	1.36792	1.79698	1.48687	3.72547	1.47392	1.89765	0.161016	17
116	2.53686	2.61357	2.90341	1.57217	2.35355	2.47217	1.86741	1.70243	1.2735	1.11095	1.81448	1.99696	1.45503	1.58472	1.64012	3.67456	1.7421	2.01847	0.159669	17
118	2.53468	2.69544	2.96326	1.71831	2.2037	2.54499	1.96773	1.72982	1.27231	1.32033	2.07347	1.82063	1.50877	1.52173	1.54114	3.88213	1.82569	2.06612	0.164913	17
120	2.47533	2.62283	2.77058	1.82436	1.81567	2.91859	1.89393	1.85576	1.21533	1.23411	2.0927	2.01488	1.53784	1.5779	1.54936	3.75157	1.97928	2.06647	0.159821	17
122	2.39003	2.6607	2.95083	1.6095	2.07298	2.50345	1.84227	1.75043	1.2279	1.26714	2.45416	1.75397	1.53252	1.88289	1.48114	3.73774	1.92127	2.06111	0.158753	17
124	2.46375	2.64096	3.04005	1.55186	2.271	2.58285	1.73752	1.76616	1.24276	1.22033	2.05347	1.70767	1.60346	1.84891	1.5513	3.7469	1.8254	2.05025	0.161966	17
126	2.37155	2.64259	3.12421	1.55159	1.9532	2.15745	2.02893	1.69306	1.23324	1.72744	2.27355	1.73475	1.43347	1.79199	1.59606	3.36523	1.78576	2.0273	0.140506	17
128	2.45641	2.5029	2.90304	1.58089	2.13522	2.61294	1.90679	1.43237	1.20452	1.23589	1.94664	1.96516	1.6534	2.30239	1.51887	3.30738	1.56226	2.01336	0.145254	17
130	2.5816	2.55646	3.20475	1.56167	1.75829	2.84979	1.99583	1.79595	1.2534	1.26871	2.55738	2.0151	1.46897	1.84285	1.62668	3.33009	1.53207	2.07056	0.158882	17
132	2.556	2.84504	3.209	1.68897	2.00621	2.44024	1.97732	1.84006	1.21179	1.34899	1.57718	1.71791	1.47132	1.91583	1.70287	3.81861	1.17205	2.02938	0.17634	17
134	2.56266	2.70893	3.07155	1.83143	1.73734	2.68682	1.86874	1.87012	1.14958	1.46452	2.33611	1.93629	1.5262	1.63551	1.62543	3.82234	2.106	2.11409	0.163893	17
136	2.45179	2.711	3.1534	1.66728	2.02366	2.42867	1.87447	1.80386	1.12753	1.48297	2.22384	1.94001	1.56102	1.5564	1.70064	3.74577	1.88175	2.07847	0.15936	17
138	2.55989	2.8606	2.82519	1.82324	1.85916	2.36457	1.77475	1.73844	1.1094	1.16053	2.27774	1.89619	1.52774	1.62806	1.62479	4.00279	1.52433	2.03279	0.175161	17
140	2.44696	2.78847	3.08539	1.62435	1.9525	2.6641	2.08768	1.93127	1.15282	1.23016	2.24255	1.7947	1.55076	1.90127	1.61784	3.75423	1.47557	2.07651	0.167356	17
142	2.70171	2.74911	2.60007	1.50355	2.39693	2.77797	2.09347	1.85541	1.15615	1.34095	2.34768	2.01566	1.54156	1.45926	1.55825	3.70741	1.83233	2.09632	0.162737	17
144	2.67461	2.67912	2.94808	1.70733	2.04484	2.50404	2.10329	2.00339	1.3962	1.48681	2.4918	1.85317	1.41001	1.91069	1.5572	3.65431	1.55585	2.11651	0.152363	17
146	2.68585	2.65268	3.09662	1.69637	1.71517	2.70048	1.89036	2.00597	1.33709	1.62898	1.63171	1.8781	1.47037	1.39132	1.6325	3.62691	1.84141	2.05188	0.159444	17
148	2.27026	2.67449	2.81018	1.73622	1.86514	3.28334	1.86896	1.60108	1.31076	1.63173	2.59621	2.07291	1.72493	1.6435	1.67581	3.70881	1.53253	2.11805	0.163559	17
150	2.4341	2.98338	2.71905	1.64633	1.79733	2.96558	2.04979	1.89472	1.18624	1.69419	2.38258	2.02795	1.48783	1.80988	1.70679	3.72819	1.88668	2.14121	0.157326	17
152	2.29241	2.76296	2.85861	1.76735	1.86379	3.32095	2.04729	1.82577	1.21753	1.26805	1.40946	2.09566	1.71229	1.66838	1.77851	3.67284	1.67267	2.07262	0.169543	17
154	2.42395	3.11891	2.79342	1.6843	1.87208	3.00716	2.03314	1.58424	1.32043	1.56814	1.43355	1.94873	1.50789	2.13291	1.79675	3.83062	1.8536	2.11234	0.169304	17
156	2.6062	2.77778	3.22606	1.75251	2.07871	2.78848	2.39634	1.85993	1.32009	1.40677	2.131	2.18809	1.59283	2.07858	1.8739	3.67655	1.84905	2.21193	0.154183	17
158	2.49485	2.73756	3.11319	1.73116	1.79352	3.08137	2.16841	1.88729	1.19134	1.53223	2.17158	2.04437	1.49899	2.30715	1.79914	3.69379	1.87401	2.18353	0.159911	17
160	2.51532	2.82012	2.93827	1.6756	1.86303	3.09796	2.16658	1.82969	1.15758	1.50488	1.58761	2.00542	1.57537	2.04434	1.94149	3.7836	1.92224	2.14289	0.164446	17
162	2.44353	2.78561	3.09865	1.8124	2.14472	3.40231	2.17103	1.78519	1.15739	1.22881	2.22122	2.13704	1.61235	2.4073	1.84448	3.80201	1.8558	2.22999	0.173635	17
164	2.68947	2.78219	2.88798	1.59202	1.9487	3.05197	2.02602	1.8509	1.25898	1.22405	1.49934	2.23232	1.56305	2.7564	1.93405	3.90148	1.88061	2.18115	0.176461	17
166	2.66458	2.80712	2.73958	1.78269	2.25399	3.22915	2.13133	1.88804	1.35639	1.53102	2.26623	2.20676	1.5974	2.31267	1.91697	3.83782	1.93294	2.26204	0.154845	17
168	2.65941	2.77288	3.20514	1.80123	1.97542	2.70177	1.92536	1.81853	1.15876	1.49005	2.25742	1.91923	1.85894	2.41756	1.91964	3.82935	1.81334	2.2073	0.159822	17
170	2.66292	2.81274	3.2456	1.89319	2.39725	3.34023	1.91157	1.7853	1.22804	1.4701	2.3193	2.3448	1.62235	2.44058	1.97611	3.91346	1.62868	2.29366	0.176141	17
172	2.83326	2.84266	3.09671	2.10999	2.25182	3.23017	1.86479	2.01484	1.21215	1.50602	1.83407	2.02687	1.66683	2.02384	2.21557	3.97204	1.97857	2.27531	0.170061	17
174	2.79891	2.80754	3.23906	1.94018	2.13863	3.25501	1.91415	2.0087	1.36359	1.42209	1.79615	2.36524	1.7616	2.25816	1.74882	3.82517	2.01419	2.27395	0.167014	17
176	2.63938	2.83933	2.79178	2.03662	2.16451	3.39583	1.97664	2.01787	1.34429	1.62532	1.95114	2.10553	1.86158	2.12441	1.81655	3.80779	2.08752	2.26977	0.153495	17
178	2.61051	2.80367	2.9961	2.01886	1.98434	3.41295	2.02041	2.07188	1.39579	1.69985	1.57274	2.09435	1.7438	2.68687	1.84963	3.78749	2.10619	2.28561	0.160877	17
180	2.72061	2.81959	3.31529	2.02395	2.42352	3.51731	1.92005	2.13148	1.34689	1.80579	2.3266	2.29816	2.06901	2.82759	1.84526	3.85478	2.17435	2.43649	0.160789	17
182	2.4607	2.79767	3.04493	1.9028	2.31737	3.50236	1.82933	2.1587	1.32984	1.79957	2.04855	2.13853	2.05312	2.41678	1.79619	3.80949	2.34667	2.33839	0.155046	17
184	2.41835	2.67969	2.96576	1.77889	2.14954	3.22732	1.92274	1.91797	1.304	1.53686	2.00414	2.02187	1.88575	2.3991	1.72898	3.71857	2.16786	2.22514	0.151283	17		Recovery: 5 minutes
186	2.47301	2.55284	3.02851	1.84161	2.33464	3.09752	1.9705	1.76828	1.13846	1.4039	1.94398	2.25579	1.87835	2.39794	1.63652	3.436	1.95105	2.18288	0.147911	17
188	2.39474	2.51995	2.97007	1.72897	2.19904	3.23175	1.99463	1.76231	1.29797	1.44739	1.73698	1.90852	1.54844	2.32732	1.5734	3.34757	1.82923	2.10696	0.149428	17
190	2.24471	2.46594	3.13996	1.68816	1.86796	3.01696	1.8921	1.72742	1.23969	1.33361	1.90779	2.03538	1.49613	2.17764	1.55729	3.36151	1.69088	2.04959	0.151368	17
192	2.23958	2.45217	2.81415	1.61801	1.77564	2.67557	1.90569	1.85682	1.06913	1.26609	1.81251	1.78598	1.36947	1.99284	1.5578	3.27406	1.61873	1.94613	0.140969	17
194	2.12972	2.35746	2.58103	1.69379	1.87995	2.51164	1.67094	1.69744	1.05478	1.165	2.01243	1.86136	1.75248	2.05759	1.51369	3.24368	1.55832	1.92596	0.130211	17
196	1.97601	2.66293	2.5974	1.628	1.78095	2.4135	1.65176	1.61062	0.977419	1.1115	1.13181	1.8109	1.42707	1.87397	1.42217	3.12422	1.61942	1.81292	0.142761	17
198	2.06193	2.12839	2.58719	1.67986	1.86373	2.687	1.60594	1.58308	1.48315	1.13666	1.23018	1.97632	1.45119	1.78784	1.96087	2.97705	1.46361	1.86259	0.123699	17
200	2.0684	2.17409	2.84163	1.64597	1.76866	2.1767	1.54035	1.49388	1.17877	1.03002	1.1361	1.82854	1.41805	1.83621	1.83313	2.82591	1.45185	1.77931	0.126605	17
202	1.87971	2.08572	2.53831	1.56131	1.51984	2.27656	1.54808	1.39364	1.0382	1.30796	2.01855	1.78712	1.43416	1.85156	1.35172	2.78981	1.22872	1.74182	0.116326	17
204	1.80158	1.99172	2.36884	1.74529	1.61266	2.32653	1.66177	1.37045	0.920619	1.24912	1.72727	1.87945	1.32903	1.58588	1.98252	2.65496	1.45078	1.74462	0.106229	17
206	1.7685	2.12288	2.48022	1.68224	1.70239	2.22948	1.78099	1.40495	1.00203	1.08881	1.10862	1.75861	1.34384	2.02539	1.32552	2.72897	1.34149	1.6997	0.120365	17
208	1.7662	2.02696	2.69514	1.78638	1.78425	2.19707	1.6495	1.4398	1.11665	1.20439	1.13369	1.8062	1.66103	1.6299	2.01721	2.59262	1.41801	1.76029	0.109694	17
210	1.69904	2.08155	2.42379	1.637	1.6685	2.18939	1.75771	1.36069	1.10394	1.33866	1.14577	1.90114	1.36106	1.6955	1.31756	2.58231	1.34565	1.6829	0.105476	17
212	1.73638	1.91917	2.66419	1.34388	1.62129	2.50486	1.65006	1.2703	1.45787	1.25458	1.18556	1.95898	1.61	1.45875	1.76875	2.39344	1.18242	1.70473	0.111063	17
214	1.64874	2.03697	2.27986	1.37403	1.41195	1.95602	1.66164	1.20569	0.976232	1.81619	1.88288	1.90714	1.28213	1.7284	1.19725	2.55202	1.24079	1.65635	0.103243	17
216	1.56089	2.07059	2.40552	1.55364	1.546	2.02646	1.65574	1.18434	1.47128	1.69694	1.23547	1.64157	1.22573	1.38599	1.28085	2.40418	1.17057	1.61857	0.096028	17
218	1.65551	2.0406	2.49984	1.37121	1.36403	2.04064	1.73658	1.21267	1.45515	1.35431	1.2314	1.7687	1.61118	1.75232	1.17109	2.41014	1.14337	1.6364	0.100971	17
220	1.38482	1.90413	2.58601	1.33048	1.67079	2.15515	1.64468	1.20329	1.50294	1.57729	1.0292	1.82409	1.25336	1.25595	1.1808	2.38251	1.19055	1.59271	0.109065	17
222	1.25479	1.95002	2.40853	1.38789	1.49691	2.11697	1.59203	1.1807	1.33628	1.35739	1.19109	1.81937	1.63219	1.40919	1.20084	2.26801	1.1613	1.57432	0.0970553	17
224	1.29785	1.90414	2.43339	1.34529	1.3391	2.11975	1.62148	1.19143	1.09002	1.30459	1.08853	1.66808	1.57901	1.39997	1.22082	1.94878	1.13884	1.51124	0.0948492	17
226	1.50494	1.87411	2.148	1.39683	1.58971	2.04646	1.5158	1.01965	1.43303	1.16381	1.03346	1.66078	1.577	1.28731	1.18525	2.19285	1.00059	1.50762	0.0929083	17
228	1.44178	1.7593	2.18001	1.47062	1.74683	2.00121	1.50314	1.18549	1.0645	1.23899	1.01235	1.62011	1.70243	1.33318	1.14142	2.1164	1.07724	1.50559	0.0901492	17
230	1.38971	1.76756	2.18346	1.44526	1.69152	1.98043	1.34523	1.17454	1.24496	1.69332	1.06044	1.7302	1.50595	1.50079	1.23422	2.11093	1.12737	1.54035	0.0825813	17
232	1.54071	1.80611	2.1161	1.39332	1.72121	2.00713	1.4218	1.16635	1.4828	1.06808	0.888378	1.64476	1.4455	1.18399	1.21182	2.30948	1.12023	1.50163	0.09543	17
234	1.46634	1.77914	2.20666	1.69762	1.64384	1.96101	1.35323	1.13174	1.37366	1.15349	1.06339	1.72704	1.54396	1.23172	1.20696	2.12429	1.06944	1.51374	0.0882376	17
236	1.32378	1.77479	2.26669	1.33479	1.60517	1.87251	1.29472	1.02208	0.903913	1.14297	1.03094	1.7205	1.34853	1.34504	1.19771	2.14026	0.896651	1.42477	0.0998077	17
238	1.31231	1.74143	2.23908	1.39962	1.44761	2.08999	1.3293	1.23117	1.07114	1.26674	0.961249	1.58898	1.24534	1.74034	1.24257	2.14607	1.13351	1.48156	0.0934115	17
240	1.37569	1.65243	2.31331	1.48964	1.51693	1.82	1.24273	1.15939	1.02937	1.27001	1.08226	1.65582	1.65257	1.21748	1.19711	2.04848	1.02445	1.45574	0.0888418	17
242	1.31454	1.69083	2.18588	1.57141	1.94379	1.84463	1.31448	1.14524	0.901212	1.41283	0.976996	1.53965	1.56436	1.0899	1.24575	2.22908	1.20056	1.48065	0.0961655	17
244	0.971156	1.68384	2.16453	1.53398	1.64858	1.74233	1.27545	1.06865	1.04462	1.20867	1.06519	1.49997	1.62233	0.925993	1.25771	2.14395	1.00137	1.40343	0.0951535	17
246	1.17544	1.67158	2.36666	1.33797	1.71276	1.7545	1.47133	1.055	0.914574	1.63634	1.12653	1.57902	1.51271	1.14635	1.23251	2.21334	1.07935	1.46976	0.097677	17
248	1.02027	1.67354	2.23781	1.39637	1.52763	1.80245	1.29585	1.0656	1.34415	1.33814	1.11958	1.48303	1.70925	0.98076	1.21911	2.047	0.990276	1.42652	0.0897915	17
250	0.966347	1.72402	2.35949	1.35522	1.45142	1.83959	1.30678	1.26961	0.858026	1.46806	1.19578	1.56861	1.45762	1.21439	1.23058	2.14627	1.27081	1.45192	0.0939337	17
252	0.844419	1.71536	2.35612	1.5596	1.49618	1.78201	1.18118	1.04758	0.899146	1.3112	0.986085	1.7379	1.62551	1.0405	1.23778	2.17821	1.05272	1.4148	0.107583	17
254	0.873532	1.69158	2.20144	1.43791	1.56767	1.79627	1.26751	1.04512	0.814309	1.41076	0.974172	1.51034	1.52916	0.872929	1.19212	2.11349	0.993158	1.37009	0.10269	17
256	0.832657	1.70182	2.10961	1.46478	1.56151	1.64646	1.2898	1.20324	1.11061	1.4609	1.01999	1.6459	1.66388	1.26401	1.29226	2.17786	1.11697	1.44484	0.0878975	17
258	0.874999	1.70569	2.4813	1.43507	1.47637	1.74908	1.16687	1.22779	0.903234	1.41452	0.968952	1.65142	1.64405	1.36172	1.26799	2.14548	1.25522	1.45469	0.102389	17
260	0.878049	1.72287	2.24891	1.49181	1.42012	1.85912	1.16653	0.961557	1.15335	1.47083	1.02654	1.62127	1.58579	1.26142	1.16402	2.01602	0.87959	1.40752	0.0973306	17
262	0.948217	1.76581	2.0457	1.47042	1.58121	1.75841	1.09158	1.07121	0.890553	1.17361	0.964163	1.831	1.58639	1.32834	1.1421	1.9745	1.05843	1.39304	0.093209	17
264	0.974159	1.70737	1.79016	1.58006	1.65328	1.83005	1.33011	1.18851	1.05274	1.13089	0.960794	1.71569	1.53664	1.14953	1.18207	2.05416	1.2066	1.41428	0.0821475	17
266	0.764463	1.72966	1.96762	1.43916	1.48102	1.7785	1.20722	1.14112	1.04191	1.22182	0.972085	1.87415	1.50448	1.21302	1.30536	2.00418	1.14798	1.39963	0.088733	17
268	0.760054	1.72931	1.93869	1.32173	1.37446	1.71109	1.24529	0.844244	1.38153	1.30042	1.02943	1.58781	1.45336	1.41035	1.18634	2.01196	0.840356	1.36038	0.0886375	17
270	0.769063	1.72688	1.82178	1.37247	1.41354	1.65427	1.21112	0.887232	1.38538	1.10689	0.98516	1.65002	1.38875	1.41716	1.2026	1.94994	0.869775	1.34188	0.0843076	17
272	0.766324	1.70509	2.04681	1.48249	1.35029	1.85957	1.18944	0.923894	0.775739	1.18153	0.971145	1.62894	1.39255	1.10527	1.19174	2.04499	0.836052	1.3207	0.102105	17
274	0.792249	1.81002	1.99791	1.84107	1.5453	1.68192	1.22137	0.927424	1.03277	1.20752	1.03824	1.68872	1.40081	1.15769	1.16694	2.12341	0.909276	1.38486	0.0997191	17
276	0.748872	1.72308	2.08716	1.28925	1.3979	1.63567	1.38187	0.945807	1.37758	1.12737	1.02685	1.75231	1.52112	1.16814	1.15489	1.95781	1.00864	1.37084	0.0897613	17
278	1.01787	1.76066	2.03738	1.61508	1.30453	1.67003	1.32468	0.894399	1.38549	1.24744	1.15083	1.6258	1.43543	1.19967	1.17154	1.92807	0.927084	1.39388	0.0814382	17
280	1.10427	1.65667	2.05365	1.56987	1.37628	1.60208	1.09934	0.802437	1.07389	1.18841	0.964312	1.67426	1.45029	1.23579	1.11816	1.89686	0.82646	1.33488	0.0884329	17
282	1.07666	1.78766	1.98152	1.57093	1.50023	1.6955	1.22407	0.94439	1.34789	1.23398	0.998085	1.65977	1.67738	1.05237	1.14246	1.90833	1.01661	1.40105	0.0832889	17
284	1.11116	1.72606	2.09174	1.29336	1.48742	1.38573	1.2307	0.86142	1.36638	1.20994	1.02655	1.61166	1.39771	0.976827	1.15113	1.9889	1.06699	1.35198	0.0832965	17
286	1.12913	1.75646	2.17731	1.14354	1.3896	1.59486	1.22959	0.760465	1.00374	1.16691	1.04122	1.7094	1.34461	1.03895	1.14549	1.99169	1.03793	1.33299	0.0936476	17
288	1.00624	1.7052	2.05334	1.29331	1.41909	1.68002	1.14832	0.823135	1.0114	1.19231	1.17962	1.6485	1.77808	1.06229	1.27951	1.84608	0.855992	1.35191	0.0897895	17
290	1.08239	1.63331	2.05513	1.5331	1.32774	1.89482	1.12894	1.03082	1.00256	1.38614	1.19984	1.69267	1.52758	1.01242	1.16071	1.95194	0.991594	1.38892	0.0865823	17
292	1.17693	1.68311	2.03732	1.30961	1.43112	1.59742	1.1898	1.01715	1.08082	1.24039	1.28882	1.4905	1.63072	1.10428	1.20904	1.93603	0.955863	1.37523	0.0760748	17
294	1.15538	1.78951	2.00112	1.44239	1.64749	1.7116	1.17653	1.03061	1.04666	1.28255	1.04286	1.62184	1.44801	1.14205	1.13774	1.97833	0.991317	1.39094	0.0829721	17
296	1.02948	1.81073	2.08257	1.43815	1.55408	1.6842	1.21544	1.00755	1.01886	1.20766	0.869651	1.52865	1.43383	0.985121	1.13965	2.1034	0.926034	1.355	0.0953334	17
298	1.23115	1.82842	2.35622	1.47049	1.32149	1.75483	1.16182	0.848311	1.01162	1.36587	1.09248	1.50455	1.51835	1.27995	1.40531	2.01324	0.912412	1.41627	0.0962495	17
300	1.07206	1.80518	1.95326	1.70745	1.27997	1.54489	1.2469	0.890197	0.973913	1.20681	1.05999	1.42124	1.40518	1.07714	1.23316	2.13148	0.839299	1.34401	0.0910367	17
302	1.12029	1.84376	1.99222	1.54464	1.49992	1.67009	1.21988	0.798502	0.954342	1.27011	1.02417	1.39591	1.41536	1.05373	1.19289	2.03559	0.830432	1.34481	0.0923624	17
304	1.23247	1.76177	1.86277	1.3978	1.40527	1.47637	1.06296	0.87991	0.939818	1.11659	1.01211	1.44522	1.35373	1.00481	1.06689	2.02706	0.824236	1.28646	0.0853726	17
306	1.23494	1.77059	2.10995	1.27477	1.22619	1.69911	1.0977	0.831602	0.954756	1.18052	1.19839	1.32702	1.51406	1.01291	1.06437	2.00571	0.815674	1.31284	0.0932557	17
308	1.20862	1.6888	2.18565	1.26627	1.41899	1.37383	1.14477	0.891524	0.977592	1.28085	1.10732	1.41774	1.519	1.19858	1.12543	2.02326	0.874766	1.33547	0.0874929	17
310	1.02662	1.67924	1.85061	1.5647	1.30542	1.32898	1.18277	0.849025	0.937315	1.08021	0.859099	1.44201	1.41585	1.21127	1.0755	1.93226	1.02492	1.28034	0.0800906	17
312	1.00203	1.70742	1.73036	1.49984	1.44232	1.35524	1.18722	0.775072	0.987655	1.25922	1.15425	1.42719	1.43306	1.17536	1.48243	1.91625	0.744577	1.31056	0.0786145	17
314	1.27186	1.67853	1.96062	1.40902	1.40278	1.28092	1.19429	0.811003	0.901764	1.0762	1.00316	1.46252	1.49586	1.17549	1.11258	1.98908	0.996731	1.3072	0.0820628	17
316	1.31905	1.66779	1.91487	1.45365	1.36863	1.31164	1.20497	0.791684	0.961565	1.41385	1.0369	1.44794	1.50797	1.18816	1.11351	1.82921	0.623991	1.30326	0.0825954	17
318	1.38411	1.77329	2.04685	1.43017	1.29914	1.40275	1.22056	0.747978	0.913634	1.47685	0.895267	1.53475	1.47259	1.23755	1.17262	1.87315	0.806169	1.33455	0.0884685	17
320	1.35004	1.63463	2.07287	1.49502	1.35329	1.18813	1.05851	0.775192	0.922013	1.29326	1.04982	1.53637	1.49109	1.40219	1.05036	1.84733	0.688119	1.30637	0.0887592	17
322	1.24139	1.75905	1.91044	1.50665	1.57832	1.38395	1.09434	0.781467	0.925948	1.07812	1.0723	1.42212	1.34644	1.07511	1.08441	1.8522	0.766079	1.28696	0.0850477	17
324	1.21828	1.75	1.8874	1.35743	1.28799	1.32482	1.25738	0.842078	0.864014	1.17857	0.940065	1.50136	1.32009	1.17463	0.936543	1.81724	0.950035	1.27105	0.0783255	17
326	1.19025	1.73822	2.17174	1.41598	1.42401	1.26981	1.2269	0.741942	0.934305	1.17726	0.943676	1.53495	1.40895	1.20216	0.921736	1.84981	0.692782	1.28497	0.0953551	17
328	1.17516	1.62939	2.12374	1.41136	1.3962	1.18468	1.30063	0.843811	0.880441	1.0583	0.878718	1.47677	1.43027	1.26971	0.932522	1.69212	0.864335	1.26754	0.0850485	17
330	1.168	1.62961	2.23391	1.5147	1.39059	1.19001	1.07204	0.771532	0.883989	1.28713	1.10624	1.48257	1.27183	1.07405	1.04971	1.68032	0.8896	1.27623	0.086983	17
332	1.2001	1.6986	2.22358	1.77662	1.30012	1.28292	1.13325	0.866191	0.904622	1.16281	0.965385	1.4671	1.48504	1.09508	1.06995	1.62518	1.11616	1.31604	0.0867018	17
334	1.10583	1.58697	1.98975	1.50847	1.30414	1.34997	1.11698	0.656181	0.909093	1.20268	0.886897	1.48642	1.24161	1.31439	1.31792	1.72513	0.667965	1.25708	0.0859699	17
336	1.12328	1.70589	1.81246	1.75341	1.54887	1.33402	1.14497	0.792724	0.928594	1.18486	1.00384	1.50446	1.17523	1.10172	1.10263	1.84871	0.784472	1.2853	0.0845917	17
338	1.07997	1.50955	1.49494	1.4454	1.42155	1.47672	1.10887	0.84849	0.860219	1.20562	1.08045	1.37221	1.24668	1.12598	0.880948	1.76981	0.751737	1.21642	0.0692632	17
340	1.03242	1.57582	1.77558	1.70621	1.46357	1.28333	1.17695	0.761169	0.910598	1.14023	1.05233	1.39136	1.19637	1.24568	0.99835	1.76762	0.761072	1.24933	0.0787861	17
342	1.16557	1.54699	2.16781	1.73151	1.4887	1.32928	1.01949	0.704283	0.833746	1.15366	0.987726	1.6461	1.20166	1.06247	1.25633	1.8232	0.743679	1.28601	0.0976263	17
344	1.02235	1.46065	2.15881	1.48526	1.50568	1.3058	1.10683	0.772039	0.980538	1.17724	1.25616	1.60608	1.26974	1.22912	1.18664	1.79199	0.803381	1.30108	0.0847438	17
346	1.08971	1.54433	2.20285	1.42407	1.41347	1.26319	1.06421	0.850682	0.863087	1.14243	1.19128	1.56134	1.21932	1.11851	0.939811	1.76044	0.883187	1.26658	0.086559	17
348	1.16691	1.47047	1.93435	1.49155	1.32667	1.52059	1.04927	0.825208	0.834846	1.23466	1.26221	1.50617	1.40202	1.07756	0.874756	1.65259	0.795007	1.26029	0.0786219	17
350	1.18314	1.42659	2.11599	1.45041	1.39264	1.20511	1.05314	0.795584	0.863132	1.03716	1.21449	1.46109	1.30982	1.0086	0.956644	1.65761	0.71065	1.22599	0.0842201	17
352	1.18665	1.4748	2.12077	1.50313	1.35053	1.22952	1.01887	0.783871	0.826576	0.96418	1.07381	1.45552	1.21496	0.937299	0.929291	1.6467	0.714896	1.20185	0.0878353	17
354	1.14669	1.48344	1.96523	1.61975	1.4662	1.21094	1.09412	0.788369	0.840061	0.903556	1.09811	1.50687	1.23206	1.00393	1.02778	1.7643	0.88884	1.23766	0.0831112	17
356	1.19908	1.45917	1.94263	1.53338	1.45218	1.33384	1.00986	0.82646	0.853496	0.957974	1.11642	1.37297	1.26476	1.06423	1.13475	1.55923	0.894587	1.23383	0.0725663	17
358	1.12933	1.54747	2.28466	1.82505	1.36032	1.40729	1.0788	0.754465	0.849003	1.04893	1.13434	1.53811	1.2874	1.29344	1.19788	1.84898	0.784737	1.31589	0.0981648	17
360	1.04487	1.55021	2.16677	1.39017	1.436	1.285	1.0147	0.986381	0.879659	1.10286	0.970066	1.34769	1.42638	1.20216	0.961694	1.71621	1.06132	1.26718	0.080535	17
362	1.00853	1.48699	2.12885	1.47655	1.38712	1.42743	1.06248	0.736763	0.882653	1.15894	0.941482	1.36825	1.58849	0.832283	1.13526	1.72196	0.752698	1.24098	0.0921621	17
364	1.03118	1.48946	1.88393	1.41305	1.41057	1.30052	0.987283	0.883744	0.81057	1.15573	1.08521	1.42566	1.26094	0.922131	1.11069	1.72895	0.9803	1.22823	0.0729192	17
366	1.05925	1.48796	1.71986	1.46265	1.39115	1.27478	1.13737	0.705757	0.849098	1.09807	1.01732	1.47194	1.5424	0.891585	1.04121	1.70524	0.774031	1.21351	0.0777515	17
368	1.1096	1.39015	2.00448	1.31753	1.49089	1.32081	0.972431	0.88657	1.14872	1.06669	1.03912	1.4542	1.47654	1.16427	0.916225	1.63167	0.794131	1.24612	0.0752118	17
370	1.02403	1.46542	1.72958	1.25952	1.492	1.36308	1.19772	0.807817	0.796199	1.05676	1.06077	1.44218	1.26665	1.05007	0.918982	1.64714	0.697603	1.19268	0.0735148	17
372	1.10733	1.43946	2.16971	1.47674	1.35432	1.04913	1.04892	0.835284	1.11905	1.12595	0.986126	1.4903	1.57637	0.988086	0.895366	1.64267	0.764764	1.23939	0.0871462	17
374	1.03579	1.41271	1.84656	1.34248	1.3126	1.15027	1.08716	0.771844	0.817636	1.07168	0.872211	1.39066	1.70249	0.954136	0.935479	1.67509	0.819363	1.18813	0.0808806	17
376	0.998948	1.39524	1.81137	1.2569	1.42121	1.30878	1.15803	0.673253	0.866177	1.06815	0.950241	1.53508	1.69094	0.898782	0.885953	1.52295	0.698174	1.18472	0.0831717	17
378	1.14278	1.44471	1.82841	1.42407	1.62942	1.27907	1.15692	0.776468	0.884713	1.13315	0.83052	1.40014	1.74211	1.05136	0.902718	1.59715	0.725051	1.23228	0.084247	17
380	1.07832	1.4598	1.85444	1.23972	1.30166	1.12449	1.08746	0.704173	0.854924	1.21478	0.853564	1.57679	1.31002	0.987499	0.829141	1.79241	0.765748	1.17853	0.0834568	17
382	1.09885	1.55259	2.22927	1.31519	1.25154	1.21942	1.05558	0.798408	0.861968	0.930134	0.83362	1.57169	1.28206	1.11599	0.856012	1.96886	0.828097	1.22172	0.0997317	17
384	1.04698	1.48781	2.16344	1.26704	1.72623	1.25132	1.06952	0.777067	0.874439	0.9695	0.76272	1.38462	1.42517	0.938839	0.859392	1.79363	0.831276	1.21347	0.0981262	17
386	0.995538	1.53931	2.29846	1.40903	1.47283	1.22858	0.987969	0.747975	0.817514	1.01585	0.852759	1.37272	1.2729	1.04257	0.791333	1.48981	0.795525	1.18416	0.095925	17
388	0.94531	1.52337	2.19994	1.50071	1.40856	1.24167	1.01985	0.718731	0.782611	1.00619	0.830221	1.42772	1.18211	1.05053	0.786598	1.80616	0.766271	1.18803	0.0999282	17
390	0.9956	1.56859	2.10152	1.38845	1.45696	1.09963	1.06369	0.709743	0.838469	1.08373	0.952931	1.46498	1.76373	0.890691	0.772821	1.70686	0.710046	1.20991	0.10014	17
392	1.10048	1.55911	2.4788	1.32073	1.3055	1.11085	1.02248	0.743073	0.783634	1.03252	0.975469	1.33256	1.3639	0.942157	0.802135	1.71486	0.791409	1.1988	0.105042	17
394	1.09516	1.46066	1.8497	1.35254	1.28209	1.19067	0.98564	0.787567	0.783745	0.975102	1.07982	1.4523	1.35269	0.915541	0.864956	1.69081	0.7847	1.17081	0.0782272	17
396	1.07988	1.47714	1.67634	1.32017	1.27345	0.987399	0.984247	0.69222	0.893559	0.993652	0.927984	1.41484	1.5821	0.906886	0.824215	1.64726	0.753781	1.14324	0.0781617	17
398	1.06763	1.53218	2.02406	1.57022	1.41216	1.16502	0.935129	0.634151	0.782485	0.989318	1.02144	1.43145	1.34357	1.12669	0.827353	1.59842	0.678789	1.18471	0.091475	17
400	1.04879	1.48273	2.23453	1.55851	1.39696	1.00858	1.06695	0.671715	0.81266	0.986732	0.830422	1.45792	1.4254	1.02084	0.824124	1.52834	0.642037	1.17631	0.0997461	17
402	0.975402	1.5685	2.1351	1.53373	1.32874	1.00213	0.957155	0.771474	0.779486	1.06768	0.830056	1.39011	1.50647	0.923354	0.80852	1.67944	0.825808	1.18136	0.0963562	17
404	0.91709	1.73178	1.86007	1.83395	1.31443	1.04323	0.901026	0.570501	0.780699	0.958518	0.902851	1.36996	1.51956	0.838248	0.906786	1.66463	0.62004	1.16079	0.103613	17
406	0.958182	1.54212	2.18689	1.56649	1.44308	1.04257	1.04158	0.662406	0.719569	0.904887	0.745209	1.34804	1.55325	0.852157	0.740023	1.51517	0.673786	1.14679	0.105264	17
408	1.0392	1.63416	2.09652	1.85429	1.29959	0.96997	1.00854	0.739973	0.800671	0.992185	0.921169	1.35891	1.44678	0.866217	0.764041	1.63232	0.656547	1.18124	0.103284	17
410	1.00186	1.683	2.05324	1.52361	1.64818	0.925849	0.914528	0.656221	0.720755	0.93192	0.861417	1.62651	1.28517	1.0316	0.788303	1.59052	0.656621	1.17055	0.104929	17
412	0.997096	1.70149	1.89047	1.73403	1.41175	1.00787	0.899958	0.62105	0.763845	0.975651	0.90865	1.51103	1.39905	0.880586	0.790501	1.55121	0.710335	1.16203	0.0983634	17
414	0.977348	1.66993	1.65898	1.5367	1.31727	0.98694	0.910235	0.71055	0.797986	1.12094	0.926412	1.46675	1.12771	0.981676	0.797317	1.70898	0.785553	1.14596	0.0832964	17
416	1.16939	1.63636	1.68406	1.83096	1.30203	1.01778	0.928182	0.670293	0.739388	0.973248	1.05483	1.4648	1.36453	0.938757	0.803458	1.65338	0.722157	1.17374	0.0909785	17
418	1.02923	1.61138	2.15602	1.81228	1.56188	0.975856	0.939828	0.631505	0.668301	0.922371	1.01751	1.42901	1.56043	0.985277	0.892766	1.49137	0.649667	1.19616	0.107833	17
420	1.00938	1.66564	1.92853	1.37405	1.58487	1.1206	0.979419	0.574839	0.74768	0.928533	1.07275	1.49119	1.40889	1.07812	0.951986	1.63495	0.582051	1.18432	0.0953756	17
422	1.09777	1.6813	1.92115	1.7615	1.37332	0.916486	0.978818	0.606117	0.661558	0.992432	0.970181	1.39621	1.62152	0.980508	0.980695	1.67143	0.590351	1.18831	0.102888	17
424	1.02975	1.61458	1.67363	1.60043	1.35805	1.22165	0.870303	0.663148	0.7065	0.929787	1.32748	1.45182	1.42153	0.852905	0.834725	1.60137	0.680922	1.16698	0.0882652	17
426	0.954129	1.74846	1.79174	1.44288	1.42615	0.987663	0.864051	0.646452	0.720675	0.886061	1.32732	1.52503	1.71735	0.829827	1.00081	1.6329	0.663153	1.18616	0.0987569	17
428	1.17724	1.66976	2.15963	1.54419	1.53883	0.907685	0.925237	0.673031	0.722676	0.962154	0.950243	1.40429	1.36582	0.981957	0.97577	1.69145	0.763345	1.20078	0.100733	17
430	1.24281	1.65703	1.88664	1.92846	1.42243	1.07847	0.832112	0.631728	0.686426	1.09615	1.3039	1.50603	1.5156	0.845749	0.950445	1.44317	0.653287	1.2165	0.100643	17
432	1.29222	1.63468	2.06922	1.6178	1.43629	1.07284	0.919034	0.70105	0.702482	0.978956	1.0167	1.20154	1.72878	0.964282	0.917214	1.43671	0.651979	1.19657	0.0983078	17
434	1.09865	1.69569	2.19561	1.45573	1.32831	0.989439	0.87023	0.643298	0.69013	1.01366	1.1706	1.61893	1.14073	0.911886	0.902294	1.67335	0.673286	1.1807	0.103849	17
436	1.10555	1.69082	1.93484	1.88945	1.40689	1.04798	0.879758	0.59655	0.666697	1.01205	1.0014	1.64256	1.23191	0.974824	0.939007	1.66376	0.638605	1.19545	0.105065	17
438	1.08852	1.663	1.85321	1.6932	1.62558	1.12181	0.895858	0.564432	0.662629	0.916387	1.05772	1.48881	1.75301	0.90504	0.932747	1.64959	0.631807	1.20608	0.105751	17
440	1.02377	1.66791	1.88097	1.65554	1.55502	1.0501	0.878197	0.614611	0.711649	0.887352	1.03695	1.46783	1.13587	1.12304	0.976265	1.63718	0.658398	1.17416	0.095558	17
442	1.08212	1.67145	1.64289	1.56073	1.32887	1.03622	0.889083	0.598648	0.6953	1.05089	1.01721	1.43427	1.57481	0.954207	0.913176	1.65043	0.632067	1.16073	0.0901755	17
444	0.923217	1.65667	2.11252	1.64756	1.51343	1.0195	0.984853	0.58506	0.683519	1.10247	0.988986	1.36095	1.5826	0.928247	0.933229	1.66721	0.59071	1.19298	0.106761	17
446	0.960826	1.67264	1.75888	1.39023	1.49846	1.04991	0.858873	0.703269	0.692534	1.05628	0.976731	1.50592	1.39928	0.939061	0.935212	1.70356	0.75147	1.16783	0.0887105	17
448	1.0831	1.58723	2.1094	1.47074	1.57992	1.01446	0.839189	0.563266	0.697709	1.0443	0.894348	1.32656	1.57965	0.852769	0.921293	1.57441	0.588817	1.16042	0.104912	17
450	1.12336	1.65301	1.75866	1.63375	1.37458	1.03712	0.860141	0.548849	0.706686	0.947662	1.03712	1.54736	1.29699	0.913563	0.883418	1.63422	0.60144	1.15047	0.0950782	17
452	1.05827	1.62139	1.82805	1.5369	1.45018	1.03585	0.922438	0.695513	0.726272	0.958175	1.07801	1.58846	1.13924	1.01608	0.909773	1.6301	0.777501	1.17484	0.0868112	17
454	1.01919	1.67654	2.11277	1.38888	1.37267	0.999117	0.876109	0.592293	0.718454	1.05372	0.878284	1.2585	1.14378	0.961237	0.873355	1.70344	0.639463	1.1334	0.0994896	17
456	1.14105	1.65532	1.73488	1.35137	1.35192	1.01161	0.865551	0.660012	0.704043	1.02183	0.973575	1.3673	1.64047	0.802585	0.947635	1.73106	0.681875	1.15542	0.0913768	17
458	1.07786	1.64266	1.93387	1.38722	1.27079	1.01878	0.80999	0.617583	0.685113	1.31151	0.926256	1.50201	1.21793	0.884708	0.898814	1.80283	0.638603	1.1545	0.0976028	17
460	1.13485	1.65163	1.98732	1.6134	1.42173	0.968449	0.811611	0.634894	0.724103	1.19551	0.865149	1.47561	1.26383	0.927262	0.929296	1.71703	0.693286	1.17735	0.0987725	17
462	1.24368	1.65663	1.92084	1.34661	1.42083	0.966211	0.825188	0.672811	0.732809	1.293	0.928512	1.37245	1.18175	0.781401	0.761243	1.67694	0.591121	1.13953	0.0960207	17
464	1.27888	1.68145	2.16787	1.53775	1.51019	0.935508	0.90009	0.686698	0.621089	0.992327	1.00886	1.5525	1.48177	0.886658	0.799257	1.65768	0.621379	1.19529	0.108966	17
466	1.04779	1.59134	2.13932	1.43771	1.399	0.975234	0.873476	0.550757	0.679185	1.02413	0.958082	1.29359	1.29538	0.942283	0.822096	1.67339	0.563659	1.13332	0.102803	17
468	1.34347	1.60294	2.16448	1.47379	1.48407	1.05521	0.835551	0.59134	0.688395	1.01181	0.787814	1.41362	1.43732	0.910337	0.865561	1.54399	0.684937	1.17027	0.103725	17
470	1.03033	1.53032	2.02548	1.38393	1.55134	0.995239	0.796371	0.576265	0.694053	1.06	1.00892	1.38553	1.14277	0.845576	0.775793	1.62124	0.597233	1.11885	0.0987913	17
472	1.13816	1.58974	2.19524	1.41122	1.57657	0.97308	0.795601	0.62297	0.691882	1.15169	1.01026	1.40158	1.1339	0.895426	0.862737	1.55345	0.659913	1.15667	0.101702	17
474	1.13178	1.54408	2.3809	1.34568	1.59098	1.1946	0.829523	0.624152	0.692791	1.10854	1.05103	1.47926	1.10546	0.782118	0.791045	1.60803	0.584713	1.16733	0.11187	17
476	1.13801	1.49392	2.07728	1.43281	1.38265	0.986258	0.837955	0.748757	0.699767	1.05598	1.14314	1.30191	1.41326	0.926224	0.802038	1.68478	0.623309	1.16165	0.0945922	17
478	1.09244	1.55797	1.96524	1.43276	1.58754	0.999043	0.829915	0.549477	0.664614	1.11849	1.04095	1.29332	1.25908	0.952268	0.943295	1.66411	0.579689	1.14884	0.096709	17
480	1.22717	1.59785	1.99775	1.4574	1.32617	0.86445	0.788535	0.535311	0.620605	0.914901	1.11605	1.30645	1.485	0.827429	0.777068	1.63248	0.550007	1.1191	0.103857	17
482	1.16278	1.53271	2.0293	1.22024	1.46128	0.918869	0.865968	0.623951	0.670342	0.973877	1.19116	1.28213	1.09462	0.931127	0.936758	1.72121	0.617939	1.13143	0.0941806	17
