# Supplementary material for: Optimized Vivid-derived Magnets photodimerizers for subcellular optogenetics in mammalian cells
Source: eLife. 2020 Nov 11;9:e63230. doi: 10.7554/eLife.63230 (PMC7735757; doi:10.7554/eLife.63230)
Supplement: Figure 4—figure supplement 2—source data 1. [file elife-63230-fig4-figsupp2-data1.xlsx]

## Sheet: HeLa WT + MSP
VAPB Accumulation on ER
200214_Optogenetics
190912_OptoVAPB_Mito
190905_OptoVAPB+ITZ
190801_Opto_MSPVAPBrecruitment
Measure: (FROI-FBkg) Normalized for F measured at t1
Time	Cell1	Cell2	Cell3	Cell4	Cell5	Cell6	Cell7	Cell8	Cell9	Cell10	Cell11	Cell12	Cell13	Cell14	Cell15	Cell16	Cell17	Cell18	Cell19	Cell20	Cell21	Cell22	Cell23	Cell24
0	1	1	1	1	1	1	1	1	1	1	1	1	1	1	1	1	1	1	1	1	1	1	1	1	1	0	24
2.5	1.04104	1.00685	1.05597	0.955645	1.04525	0.961973	1.01133	0.954858	1.07654	1.07837	1.03169	1.30691	1.21382	1.11573	1.01032	1.09176	1.02669	1.38049	1.08621	1.14679	1.26663	1.43807	1.0939	1.11749	1.10476	0.0263751	24
5	1.11245	1.03475	1.08038	0.924608	1.00426	0.956515	1.02485	0.990454	1.06529	1.06684	1.06203	1.39797	1.32728	1.17486	1.05704	1.10138	1.06179	1.66357	1.18471	1.33911	1.30407	1.57828	1.13659	1.19081	1.16	0.0383449	24
7.5	1.17624	1.06537	1.11217	0.960921	0.981353	0.974326	1.03473	0.971423	1.15288	1.12673	1.14968	1.4402	1.2667	1.16712	1.10716	1.21529	1.13676	1.82195	1.2036	1.48409	1.51916	1.63039	1.18558	1.2465	1.21376	0.0446507	24
10	1.29247	1.0995	1.10949	0.943409	0.994344	0.974905	1.07141	0.990877	1.13604	1.08093	1.17289	1.4817	1.38666	1.17983	1.15093	1.18651	1.14446	2.13091	1.406	1.6251	1.48164	1.7148	1.24808	1.32807	1.26379	0.0561496	24
12.5	1.31268	1.09544	1.16226	0.967884	1.02537	1.00587	1.12335	1.01573	1.11235	1.1931	1.24412	1.53172	1.55145	1.29596	1.18146	1.15497	1.16626	2.28017	1.54102	1.65916	1.5416	1.85434	1.31521	1.33187	1.31931	0.0627088	24
15	1.39503	1.14919	1.14531	0.94729	1.0028	1.0217	1.088	1.03494	1.19897	1.23211	1.24226	1.57297	1.44993	1.33371	1.22121	1.25384	1.22535	2.16459	1.63722	1.61742	1.63016	1.90455	1.36351	1.36745	1.34165	0.0601134	24
17.5	1.41148	1.16264	1.19974	0.977934	1.01609	1.00962	1.15147	1.03237	1.11971	1.22629	1.31953	1.60582	1.35508	1.33502	1.2562	1.25886	1.25117	2.30832	1.76356	1.72628	1.73017	2.03655	1.38839	1.44072	1.37846	0.0681872	24
20	1.52644	1.16876	1.19748	0.998126	1.03564	1.03503	1.11399	1.06901	1.17975	1.27237	1.37818	1.66452	1.58323	1.33573	1.25758	1.29534	1.24416	2.34368	1.6829	1.77257	1.73873	2.03985	1.43069	1.44068	1.40852	0.0685268	24
22.5	1.5154	1.21878	1.22366	0.975041	1.04227	1.03353	1.11801	1.09651	1.21821	1.37784	1.41844	1.7281	1.55536	1.33148	1.34798	1.31739	1.32802	2.4618	1.85668	1.90958	1.77601	2.24833	1.46155	1.49583	1.46066	0.0768277	24
25	1.53036	1.24687	1.23657	1.01947	1.09297	1.06207	1.14337	1.09754	1.22369	1.3439	1.46604	1.77042	1.71851	1.42501	1.3532	1.43055	1.3008	2.4366	1.89145	2.03724	1.90685	2.23543	1.51224	1.5464	1.50115	0.0777175	24
27.5	1.59538	1.27001	1.22884	1.04445	1.06801	1.06028	1.15886	1.10738	1.25761	1.34987	1.49004	1.80843	1.74671	1.45723	1.37086	1.45873	1.3911	2.45287	1.92813	2.0924	1.99935	2.23437	1.52263	1.60752	1.52921	0.0794619	24
30	1.65258	1.26373	1.23084	1.0388	1.0812	1.07736	1.17345	1.09787	1.33984	1.37042	1.51328	1.82841	1.72973	1.51529	1.38802	1.52241	1.43275	2.54419	2.0188	2.21156	2.06288	2.33991	1.57595	1.60495	1.56726	0.0851679	24
32.5	1.72963	1.31117	1.27123	1.04424	1.06933	1.0911	1.1905	1.14299	1.34859	1.40595	1.52944	1.86392	1.79634	1.54647	1.41816	1.53476	1.45484	2.63046	2.0582	2.19534	2.04259	2.39256	1.56644	1.63357	1.59449	0.0868264	24
35	1.8262	1.32245	1.30926	1.06959	1.08837	1.10957	1.14283	1.15172	1.2636	1.42521	1.60982	1.88652	1.98025	1.54835	1.47545	1.50983	1.42046	2.65066	2.15693	2.14965	2.1899	2.40454	1.62906	1.68443	1.62519	0.0906851	24
37.5	1.76592	1.3288	1.27805	1.06041	1.08598	1.09752	1.21885	1.14959	1.36188	1.52276	1.65663	1.90879	1.78966	1.54199	1.50318	1.63041	1.47892	2.74107	2.22947	2.29206	2.23579	2.51678	1.6075	1.70129	1.6543	0.0946747	24
40	1.84579	1.38009	1.3023	1.05791	1.11219	1.08772	1.21676	1.18229	1.3769	1.50041	1.66354	1.93916	1.79279	1.58965	1.54788	1.65488	1.50838	2.87072	2.28055	2.35235	2.25819	2.48159	1.62973	1.71911	1.68129	0.0975605	24
42.5	1.82107	1.39719	1.30454	1.06472	1.09059	1.09195	1.24584	1.18591	1.32762	1.57172	1.70343	1.95022	1.7537	1.59081	1.56022	1.65145	1.52798	3.03142	2.38777	2.40511	2.19784	2.4847	1.64545	1.74842	1.69749	0.102272	24
45	1.92613	1.3806	1.34502	1.0763	1.10907	1.08797	1.25891	1.19916	1.3854	1.56826	1.7292	1.99593	1.96381	1.65048	1.56682	1.66965	1.53424	2.82258	2.4008	2.42629	2.26284	2.5283	1.70333	1.74828	1.72247	0.0992014	24
47.5	1.83233	1.39972	1.32912	1.10631	1.14001	1.11022	1.25396	1.18238	1.36719	1.62056	1.76605	2.00312	1.94549	1.69447	1.55161	1.61829	1.53191	3.04355	2.28903	2.54487	2.23399	2.64384	1.72792	1.76541	1.73756	0.10486	24
50	1.80937	1.42683	1.33199	1.0899	1.14993	1.10071	1.273	1.22494	1.3393	1.63626	1.83212	2.01502	1.90181	1.62718	1.54349	1.80721	1.57903	3.14228	2.40401	2.58975	2.42854	2.73729	1.71116	1.83044	1.77215	0.111624	24
52.5	2.07652	1.44172	1.37052	1.16371	1.15142	1.1269	1.28863	1.21136	1.43585	1.61244	1.83985	2.02554	1.86081	1.6647	1.64821	1.72363	1.60676	3.14554	2.50323	2.54594	2.4545	2.86578	1.69439	1.89547	1.80639	0.112846	24

## Sheet: HeLa WT+MSP+ITZ
VAPB Accumulation on ER
190912_OptoVAPB_Mito
190905_OptoVAPB+ITZ
190801_Opto_MSPVAPBrecruitment
Measure: (FROI-FBkg) Normalized for F measured at t1
Time	Cell1	Cell2	Cell3	Cell4	Cell5	Cell6	Cell7	Cell8	Cell9	Cell10	Cell11	Cell12	Cell13	Cell14	Cell15	Cell16	Average	ES	N
0	1	1	1	1	1	1	1	1	1	1	1	1	1	1	1	1	1	0	16
2.5	1.03962	1.09977	1.15176	1.08875	1.02415	1.02357	1.08698	1.16107	1.12859	1.11519	1.096	1.07593	1.13232	1.08516	1.00014	0.98576	1.08092	0.0132372	16
5	1.08041	1.127	1.19907	1.22677	1.12239	1.16563	1.18115	1.23134	1.18621	1.11173	1.18371	1.1585	1.22644	1.13061	1.01653	1.04456	1.1495	0.0159943	16
7.5	1.13913	1.14957	1.30806	1.22742	1.19011	1.18309	1.25055	1.22546	1.25599	1.11817	1.25591	1.20052	1.23911	1.22447	0.994291	1.07988	1.19011	0.0196353	16
10	1.21536	1.20248	1.34134	1.3284	1.26721	1.25399	1.34122	1.33978	1.28579	1.19794	1.26721	1.21723	1.31085	1.23713	1.08106	1.06893	1.24725	0.0209243	16
12.5	1.22719	1.31294	1.46963	1.45183	1.34183	1.35577	1.39613	1.40445	1.34828	1.19554	1.28955	1.26893	1.33952	1.2698	1.05611	1.13714	1.30404	0.0277519	16
15	1.29107	1.35365	1.5006	1.53147	1.39753	1.28978	1.40923	1.45468	1.33036	1.27447	1.29633	1.31761	1.38585	1.29429	1.08892	1.21061	1.33915	0.0273531	16
17.5	1.36321	1.43435	1.47642	1.4873	1.43662	1.42721	1.47124	1.50837	1.41085	1.2729	1.33912	1.34366	1.4285	1.3144	1.1038	1.15548	1.37334	0.0290358	16
20	1.39897	1.45001	1.59132	1.64415	1.46159	1.45498	1.51603	1.52659	1.44953	1.31832	1.37188	1.35968	1.47741	1.37475	1.12494	1.21437	1.42091	0.0326796	16
22.5	1.43334	1.5073	1.66263	1.62766	1.47272	1.48512	1.58818	1.59577	1.492	1.38157	1.39304	1.40537	1.48215	1.36943	1.12377	1.17076	1.44943	0.0368572	16
25	1.45694	1.55606	1.73475	1.69765	1.62874	1.5162	1.58617	1.61179	1.5316	1.35849	1.43079	1.43081	1.49429	1.37738	1.17158	1.22128	1.48778	0.0389847	16
27.5	1.48245	1.59185	1.74842	1.75983	1.6523	1.58924	1.6159	1.65743	1.59119	1.46147	1.46487	1.43748	1.48971	1.40818	1.19693	1.24361	1.52443	0.0397315	16
30	1.54271	1.64195	1.79616	1.82562	1.68359	1.62001	1.66767	1.70462	1.54626	1.42703	1.48269	1.48665	1.57346	1.44505	1.16651	1.25051	1.55378	0.0445973	16
32.5	1.55584	1.65075	1.86203	1.82377	1.68979	1.68866	1.71609	1.738	1.58363	1.45929	1.51062	1.52262	1.56341	1.47246	1.23168	1.29403	1.58517	0.0432585	16
35	1.64956	1.63909	1.93111	1.92374	1.73875	1.74168	1.77131	1.75149	1.6231	1.49938	1.53712	1.53083	1.5814	1.48131	1.19774	1.29543	1.61832	0.0497113	16
37.5	1.62742	1.74739	2.02608	1.95592	1.83444	1.74838	1.77283	1.81646	1.6951	1.55869	1.54896	1.56925	1.56799	1.49751	1.22966	1.30498	1.65632	0.0533729	16
40	1.67707	1.73947	2.00905	1.93773	1.83889	1.73414	1.8726	1.87046	1.66438	1.56316	1.57345	1.53513	1.60481	1.55295	1.23639	1.30232	1.6695	0.0534435	16
42.5	1.67863	1.79851	2.00817	1.97843	1.8704	1.81649	1.90763	1.86581	1.70193	1.59018	1.59514	1.58334	1.64349	1.57762	1.26291	1.33863	1.70108	0.0529275	16
45	1.72058	1.82206	2.03758	2.04609	1.87987	1.83033	1.93603	1.94105	1.76933	1.58563	1.61626	1.58111	1.68134	1.55263	1.26593	1.30918	1.72344	0.0579401	16
47.5	1.68613	1.88124	2.09363	2.07427	1.99006	1.84205	1.9262	1.98222	1.77963	1.62217	1.57608	1.6116	1.72306	1.60826	1.26613	1.32272	1.74909	0.0612283	16
50	1.71414	1.89548	2.14865	2.10101	2.00006	1.85775	1.96224	1.99778	1.7609	1.64766	1.65021	1.62477	1.72396	1.58568	1.28218	1.35057	1.76894	0.0619725	16
52.5	1.78767	1.88909	2.27077	2.16885	1.95817	1.92327	1.99827	2.01335	1.8081	1.68892	1.67878	1.69422	1.769	1.5631	1.28337	1.36208	1.80356	0.065975	16

## Sheet: VAPDKO+MSP
VAPB Accumulation on ER
HeLa VAP DKO + MSP domain
200313_PI4POpto
200206_Optogenetics
191011_MSPrecruitment
190905_OptoVAPB+ITZ
Measure: (FROI-FBkg) Normalized for F measured at t1
Time	Cell1	Cell2	Cell3	Cell4	Cell5	Cell6	Cell7	Cell8	Cell9	Cell10	Cell11	Cell12	Cell13	Cell14	Cell15	Cell16	Cell17	Cell18	Cell19	Cell20	Average	ES	N
0	1	1	1	1	1	1	1	1	1	1	1	1	1	1	1	1	1	1	1	1	1	0	20
2.5	1.05243	1.04345	1.09534	1.09832	1.09943	1.06125	0.983096	1.05945	0.961292	1.09902	0.999963	1.22911	1.04889	1.06466	1.15084	1.17546	1.28045	1.23128	1.10779	1.18632	1.10139	0.0190309	20
5	1.10035	1.11523	1.17141	1.18551	1.14402	1.1544	1.04861	1.08263	1.05243	1.03693	1.0661	1.29761	1.17577	1.05289	1.21251	1.23745	1.3294	1.31897	1.18667	1.1025	1.15357	0.0203347	20
7.5	1.12832	1.14645	1.22041	1.20479	1.20997	1.15917	1.09434	1.10567	1.08999	1.16766	1.08932	1.28476	1.19081	1.02884	1.13512	1.263	1.35612	1.39854	1.22084	1.12755	1.18108	0.0206942	20
10	1.18852	1.20488	1.27127	1.22967	1.25408	1.16606	1.1122	1.10917	1.08869	1.18195	1.18853	1.29763	1.24296	1.03616	1.17385	1.34885	1.45798	1.46387	1.31649	1.20536	1.22691	0.0248871	20
12.5	1.24938	1.25748	1.32978	1.28935	1.27987	1.21926	1.126	1.17034	1.09791	1.3093	1.16137	1.40432	1.32338	0.998686	1.17149	1.44554	1.52123	1.5755	1.36878	1.16615	1.27326	0.032144	20
15	1.27858	1.28795	1.36591	1.31883	1.31165	1.23405	1.20271	1.14982	1.1175	1.30468	1.21835	1.43625	1.24773	1.03197	1.18841	1.47265	1.51292	1.63779	1.37041	1.21504	1.29516	0.0319681	20
17.5	1.35892	1.34248	1.41746	1.36979	1.34497	1.26361	1.20676	1.16229	1.18039	1.33287	1.219	1.55044	1.33574	1.02617	1.23551	1.58012	1.71906	1.72105	1.42821	1.25099	1.35229	0.0402477	20
20	1.37313	1.37704	1.43267	1.40267	1.37749	1.30531	1.25966	1.19363	1.14477	1.35754	1.29272	1.57398	1.40264	1.06861	1.28262	1.64765	1.72728	1.78308	1.47352	1.30692	1.38915	0.0408245	20
22.5	1.44353	1.42394	1.49571	1.42184	1.40534	1.33203	1.28501	1.19259	1.19938	1.38076	1.27214	1.6419	1.48061	1.12057	1.30412	1.69943	1.77242	1.87267	1.529	1.28302	1.4278	0.0443932	20
25	1.45571	1.46242	1.51305	1.47383	1.44266	1.38686	1.31856	1.18208	1.1389	1.45939	1.39559	1.6669	1.56562	1.0893	1.31469	1.71508	1.83394	1.9013	1.55742	1.34893	1.46111	0.0472151	20
27.5	1.49861	1.5048	1.55248	1.51244	1.46659	1.42091	1.31242	1.21711	1.22583	1.51097	1.43232	1.60944	1.44575	1.17513	1.31662	1.75993	1.85574	1.93347	1.61808	1.30724	1.48379	0.0455186	20
30	1.50834	1.52635	1.60525	1.57392	1.49657	1.38769	1.34718	1.22693	1.16077	1.48016	1.5257	1.8102	1.65929	1.17815	1.30932	1.74499	1.92825	2.01477	1.73307	1.41439	1.53156	0.0527073	20
32.5	1.57718	1.56241	1.63705	1.54118	1.52078	1.46392	1.39989	1.25839	1.20351	1.57486	1.49195	1.809	1.68737	1.16719	1.34581	1.86151	1.99438	2.09308	1.61422	1.40396	1.56038	0.0546604	20
35	1.58442	1.59857	1.67239	1.61819	1.54219	1.47698	1.33972	1.23964	1.20164	1.50618	1.39993	1.86687	1.75488	1.16987	1.39277	1.91244	2.05585	2.11124	1.69907	1.46123	1.5802	0.0593958	20
37.5	1.59799	1.61797	1.69509	1.64583	1.56611	1.50096	1.43441	1.24806	1.21277	1.54772	1.45458	1.93589	1.72865	1.23372	1.37341	1.88311	2.00379	2.18601	1.73455	1.47503	1.60378	0.0580937	20
40	1.65964	1.67094	1.72213	1.65033	1.59821	1.54617	1.48102	1.29186	1.20088	1.60581	1.45557	2.02207	1.80389	1.20404	1.36969	2.05662	2.1533	2.21935	1.82413	1.45901	1.64973	0.0662267	20
42.5	1.68414	1.68024	1.75803	1.68203	1.63579	1.57297	1.46787	1.27681	1.27165	1.63005	1.60535	2.02077	1.80057	1.23562	1.43037	2.03996	2.13433	2.25418	1.8803	1.48591	1.67735	0.0635705	20
45	1.71586	1.69899	1.78643	1.75013	1.64866	1.55174	1.46175	1.31047	1.25371	1.68278	1.69106	2.02455	1.8189	1.22767	1.37467	2.06074	2.17955	2.2804	1.87288	1.47807	1.69345	0.0662243	20
47.5	1.71873	1.73725	1.81296	1.73708	1.67265	1.55341	1.55662	1.28823	1.2309	1.68046	1.56767	2.11345	1.93118	1.20498	1.37011	2.19075	2.20522	2.30012	2.05956	1.58649	1.72589	0.0730792	20
50	1.77046	1.76019	1.84821	1.69561	1.6699	1.61091	1.56042	1.32381	1.28076	1.68775	1.63979	2.08475	1.91111	1.16838	1.37146	2.17372	2.21464	2.29843	2.17154	1.46422	1.7353	0.0736904	20
52.5	1.80842	1.78952	1.85741	1.79029	1.66715	1.6312	1.56423	1.32673	1.25757	1.74976	1.65531	2.04201	2.01235	1.27925	1.36504	2.17685	2.28103	2.40097	2.05317	1.58595	1.76471	0.0731002	20

## Sheet: VAPDKO+MSP+ITZ
VAPB Accumulation on ER
HeLa VAP DKO + MSP domain + ITZ
200206_Optogenetics
190905_OptoVAPB+ITZ
200313_PI4POpto
Measure: (FROI-FBkg)/(FWholeCell-FBkg) Normalized for F measured at t1
Time	Cell1	Cell2	Cell3	Cell4	Cell5	Cell6	Cell7	Cell8	Cell9	Cell10	Cell11	Cell12	Cell13	Cell14	Cell15	Cell16	Average	ES	N
0	1	1	1	1	1	1	1	1	1	1	1	1	1	1	1	1	1	0	16
2.5	1.05205	1.00078	1.10485	1.0402	1.10259	1.05463	1.04812	1.31513	0.994091	1.10168	1.08657	1.11778	1.05896	1.14173	1.12671	1.16174	1.09423	0.0189204	16
5	1.11714	1.05992	1.19459	1.0794	1.16726	1.11392	1.09134	1.3185	1.01253	1.02189	1.14396	1.12142	1.18007	1.11971	1.08694	1.18596	1.12591	0.0186603	16
7.5	1.11539	1.08144	1.19031	1.12024	1.21987	1.14372	1.12691	1.34297	1.01414	1.11006	1.19604	1.20895	1.19497	1.20683	1.14801	1.22642	1.16539	0.0187146	16
10	1.16526	1.17826	1.20415	1.12804	1.26641	1.20503	1.20434	1.43632	1.00539	1.14824	1.23877	1.3393	1.32719	1.29113	1.22028	1.2828	1.22756	0.0248526	16
12.5	1.24633	1.22367	1.24927	1.1948	1.34914	1.21877	1.32286	1.49615	1.01207	1.20444	1.27786	1.29409	1.36744	1.32313	1.2693	1.32163	1.27318	0.0256506	16
15	1.25461	1.26822	1.29879	1.22228	1.38112	1.26628	1.32332	1.58073	1.04867	1.29525	1.32255	1.34576	1.29121	1.33418	1.2597	1.33865	1.30196	0.0263214	16
17.5	1.30094	1.27074	1.3875	1.27349	1.41768	1.26959	1.25904	1.64873	1.03703	1.35836	1.37547	1.36866	1.50074	1.42647	1.29794	1.32522	1.34485	0.0325956	16
20	1.33294	1.32857	1.46417	1.26435	1.47112	1.31037	1.38496	1.69574	1.02904	1.34823	1.42764	1.43143	1.55357	1.49167	1.30766	1.44244	1.39274	0.0363096	16
22.5	1.4298	1.34223	1.39918	1.2814	1.53314	1.33064	1.29025	1.74109	1.04263	1.34117	1.45432	1.48863	1.44083	1.44551	1.39946	1.47793	1.40239	0.036567	16
25	1.39657	1.41301	1.4904	1.32166	1.5846	1.40565	1.40938	1.76411	1.04231	1.38944	1.48779	1.46556	1.60053	1.58943	1.4678	1.46771	1.456	0.0385373	16
27.5	1.37666	1.43373	1.49638	1.38024	1.62235	1.4644	1.48542	1.80859	1.09978	1.40031	1.52627	1.51112	1.61476	1.49713	1.58025	1.51654	1.48837	0.0373212	16
30	1.4573	1.43411	1.50538	1.3742	1.66891	1.48207	1.47766	1.8745	1.07482	1.4647	1.54518	1.55586	1.64494	1.72497	1.48748	1.56542	1.52109	0.0431924	16
32.5	1.45188	1.46247	1.57458	1.42367	1.71393	1.51844	1.49895	1.87371	1.09121	1.52499	1.55693	1.69025	1.73655	1.65801	1.60827	1.62782	1.56323	0.0434486	16
35	1.45168	1.52498	1.5663	1.43553	1.73274	1.51666	1.54538	1.93536	1.10201	1.52876	1.59336	1.70631	1.80581	1.63973	1.57251	1.65806	1.5822	0.0457909	16
37.5	1.5092	1.55151	1.5828	1.4644	1.79486	1.54712	1.58613	1.89768	1.13526	1.67059	1.59681	1.69356	1.89008	1.69388	1.58572	1.60109	1.61254	0.0446854	16
40	1.47242	1.5581	1.62337	1.50483	1.73691	1.58806	1.60502	1.94033	1.1424	1.58273	1.63691	1.65112	1.85809	1.79473	1.64585	1.66387	1.6253	0.0445587	16
42.5	1.52288	1.57664	1.64425	1.4912	1.80851	1.55932	1.68109	2.00652	1.12901	1.64691	1.66459	1.74599	1.7276	1.81735	1.63872	1.69347	1.64713	0.0467703	16
45	1.56911	1.55658	1.72202	1.5235	1.87074	1.63019	1.6662	2.08781	1.16532	1.77174	1.68895	1.81464	1.75075	1.85951	1.69599	1.77715	1.69689	0.0497089	16
47.5	1.58157	1.6104	1.70856	1.50967	1.87002	1.6555	1.67003	2.06856	1.14342	1.80672	1.70087	1.77209	1.97688	1.84198	1.71372	1.72339	1.70959	0.051979	16
50	1.59121	1.62277	1.75101	1.55099	1.89365	1.62191	1.63003	2.1424	1.18693	1.71336	1.73029	1.86778	1.8737	1.96702	1.89852	1.84716	1.74305	0.0544741	16
52.5	1.61717	1.70397	1.74145	1.59673	1.94775	1.68159	1.73955	2.15404	1.16682	1.81328	1.76581	1.86052	1.90355	1.95464	1.8385	1.9038	1.77432	0.0537942	16
