# Supplementary material for: Optimized Vivid-derived Magnets photodimerizers for subcellular optogenetics in mammalian cells
Source: eLife. 2020 Nov 11;9:e63230. doi: 10.7554/eLife.63230 (PMC7735757; doi:10.7554/eLife.63230)
Supplement: Figure 4—figure supplement 3—source data 1. [file elife-63230-fig4-figsupp3-data1.xlsx]

## Sheet: Wt + PH
PI4P Removal from Golgi
HeLa Wt + PH domain OSBP
Experiments:
200214_Optogenetics
200313_PI4POpto
Measure: (FROI-FBkg)/(FWholeCell-FBkg) Normalized for F measured at t1
Time	Cell1	Cell2	Cell3	Cell4	Cell5	Cell6	Cell7	Cell8	Cell9	Cell10	Cell11	Cell12	Cell13	Cell14	Cell15	Cell16	Average	ES	N
0	1	1	1	1	1	1	1	1	1	1	1	1	1	1	1	1	1	0	16
2.5	1.01209	1.00018	1.00529	0.976056	0.999978	0.98005	1.00787	0.998059	1.03472	0.997626	0.997568	1.01133	0.972424	1.00914	1.00938	1.00786	1.00123	0.00383324	16
5	1.00244	1.00487	1.00186	0.960825	1.00608	0.982568	1.01187	1.00786	1.03512	0.994623	0.979593	1.00752	0.96092	1.0019	1.00638	1.00512	0.998096	0.00473731	16
7.5	1.01564	1.00407	1.0047	0.975056	1.01661	0.986846	0.99675	1.01739	1.05715	1.00302	0.991871	1.01056	0.957327	1.01437	1.00418	1.01539	1.00443	0.0054346	16
10	1.01841	1.01184	1.0085	0.978218	0.989968	0.997723	1.0148	1.01944	1.03494	1.00541	0.987332	1.00076	0.967896	0.995887	1.00975	1.00948	1.00315	0.00419007	16
12.5	1.02961	1.0065	1.00118	0.986255	1.01034	0.96675	1.00142	1.01297	1.03604	0.991208	1.00872	0.995632	0.970929	1.00272	1.01136	1.00682	1.0024	0.00451806	16
15	1.04809	1.01184	1.0014	0.97185	0.996267	0.975337	0.99175	1.03295	1.02102	0.988886	0.995037	1.02114	0.982695	0.995639	0.991453	0.999985	1.00158	0.00516863	16
17.5	1.04812	1.00767	1.00957	0.981641	1.00919	0.995417	0.992699	1.00649	1.02297	0.984525	0.991138	1.01299	0.988261	1.00679	0.999579	1.0064	1.00397	0.00407858	16
20	1.05479	1.01873	1.01259	0.962379	1.03336	1.00797	1.00101	1.02677	1.03336	0.988189	1.00402	1.01925	0.992111	1.01025	1.00446	1.00838	1.0111	0.00530156	16
22.5	1.07229	1.01372	1.00796	0.957713	1.02056	0.994573	0.990069	1.02442	1.02062	0.985262	1.01615	1.01741	1.00378	1.01272	0.993311	1.00722	1.00861	0.00602274	16
25	1.08232	1.01513	1.00581	0.940149	1.01438	0.982355	0.992148	1.01881	1.03251	0.990039	0.999343	1.00768	0.980992	1.01594	0.993786	0.998456	1.00436	0.00739411	16
27.5	1.07873	1.01168	1.01102	0.971666	1.03883	0.985622	0.996166	1.03163	1.04561	0.995162	1.00508	1.01755	0.977536	1.03172	0.991797	1.01988	1.01311	0.00696799	16
30	1.07953	1.01508	1.0092	0.949331	1.0157	1.0039	0.986778	1.02137	1.04125	0.992139	0.996563	1.01893	0.990779	1.01888	0.976449	1.01442	1.00814	0.00718027	16
32.5	1.09125	1.01785	1.01006	0.954117	1.01684	1.01749	0.986998	1.03599	1.05636	0.992059	0.99706	1.01633	0.994306	1.01346	0.965526	0.997418	1.01019	0.00820737	16
35	1.08676	1.01812	1.0107	0.933669	1.01709	0.957361	0.978393	1.0248	1.04753	0.987306	1.00439	1.02461	1.00443	1.02305	0.983511	0.9991	1.0063	0.00884933	16
37.5	1.09552	1.02319	1.00768	0.926236	1.02253	0.97917	0.981209	1.02779	1.0304	1.00188	1.00532	1.01456	1.01139	1.0406	0.992774	1.00928	1.0106	0.00878367	16
40	1.09089	1.04074	1.01088	0.915211	1.03346	0.999816	0.966711	1.04632	1.03226	0.994593	1.02318	1.02497	0.999004	1.03591	0.973507	1.01598	1.01271	0.00989394	16
42.5	1.08358	1.03039	1.00366	0.920462	1.04656	0.997463	0.985638	1.06168	1.04143	1.0073	1.03381	1.02602	0.983758	1.04387	0.993997	1.00504	1.01654	0.00955161	16
45	1.07424	1.03174	1.00076	0.918463	1.06571	1.00698	0.982712	1.06997	1.03205	1.01076	1.01208	1.03188	1.00593	1.05213	0.967285	1.01797	1.01754	0.0100533	16
47.5	1.07463	1.03727	1.00442	0.919893	1.05206	1.00345	0.968729	1.07224	1.04108	1.01743	0.995334	1.03264	1.0329	1.05316	0.958906	1.01458	1.01742	0.0104774	16
50	1.07917	1.02759	0.99492	0.909796	1.06791	0.9645	0.958682	1.06826	1.04512	1.0162	0.989067	1.04153	1.0193	1.0584	0.98634	1.00522	1.0145	0.0115839	16
52.5	1.07572	1.02565	1.00661	0.892866	1.05979	0.976147	0.958845	1.08334	1.02898	1.01095	0.985843	1.04363	1.03956	1.05696	0.993868	1.03895	1.01736	0.0121282	16
55	1.07139	1.02014	1.00135	0.871902	1.06163	0.96763	0.960159	1.08152	1.04349	1.01185	0.984018	1.03651	0.995336	1.04962	0.955874	1.00889	1.00758	0.0132605	16
57.5	1.07241	1.0124	0.998909	0.901981	1.05709	0.991416	0.967146	1.09075	1.0412	1.01899	0.980497	1.04387	1.014	1.05567	0.98135	1.00784	1.01472	0.0115926	16
60	1.05817	1.01696	1.00148	0.882341	1.0693	0.955451	0.945428	1.08849	1.04467	1.02423	0.972829	1.0608	1.00603	1.06417	0.961633	0.999661	1.00948	0.0138922	16
62.5	1.04357	1.01027	0.996932	0.909327	1.07528	0.954682	0.950238	1.11415	1.04765	1.03414	0.981975	1.06355	1.00537	1.07901	0.96591	1.02537	1.01609	0.013723	16
65	1.03832	1.00773	0.995033	0.91972	1.05118	0.971737	0.974573	1.13767	1.05626	1.02642	0.95593	1.06928	1.03274	1.0669	0.956726	0.996947	1.01607	0.0136805	16
67.5	1.02917	1.00203	0.999017	0.910677	1.05552	0.955391	0.970765	1.16324	1.03246	1.01278	0.959727	1.0797	1.02602	1.06677	0.960907	0.997678	1.01387	0.0150268	16
70	1.0253	1.00579	0.989215	0.899364	1.06822	0.965762	0.946192	1.14107	1.0464	1.02228	0.951752	1.08734	1.01581	1.07315	0.974127	1.00061	1.01327	0.0152202	16
72.5	1.01456	1.00786	0.989379	0.915867	1.08715	0.960045	0.980529	1.1509	1.05284	1.01763	0.953144	1.06994	1.00861	1.08739	0.957014	0.994215	1.01544	0.0152442	16
75	1.01737	1.01062	0.990199	0.918769	1.07111	0.953189	0.965042	1.17323	1.09605	1.01922	0.94945	1.09562	0.996419	1.08843	0.968657	1.01378	1.02045	0.0169799	16
77.5	1.00126	1.00537	0.986895	0.958325	1.07856	0.961904	0.973962	1.15043	1.07863	1.01149	0.95349	1.10113	0.972535	1.07019	0.959863	1.01002	1.01713	0.0150378	16
80	1.00936	0.998789	0.991059	0.927512	1.07947	0.954707	0.991633	1.13975	1.06151	1.00338	0.930507	1.10778	1.01676	1.06243	0.968767	1.00202	1.01534	0.0151415	16
82.5	0.996018	1.00094	0.984804	0.952508	1.07037	0.963054	0.98604	1.13341	1.06937	0.992673	0.947316	1.11065	1.02126	1.09374	0.966442	0.999154	1.01798	0.0147041	16
85	0.991756	0.996973	0.990789	0.959153	1.06345	0.976775	0.958725	1.11622	1.03949	0.99016	0.939552	1.12711	1.01592	1.09656	0.960528	1.0064	1.01435	0.0145711	16
87.5	0.981498	0.988754	0.996841	0.9659	1.05667	0.941932	0.996299	1.11387	1.07885	0.982765	0.930443	1.12829	1.01093	1.0816	0.960333	0.995957	1.01318	0.0150834	16
90	0.983712	0.99252	0.995917	1.00056	1.04267	0.953138	0.980292	1.13611	1.08884	0.981667	0.923445	1.1371	1.04408	1.10714	0.96307	0.998304	1.02054	0.0163551	16
92.5	0.979531	0.990549	0.993503	0.947037	1.04767	0.957331	0.993016	1.07716	1.04626	0.98661	0.92824	1.12656	1.04497	1.09902	0.968957	0.979921	1.0104	0.0142013	16
95	0.960561	0.987991	0.989086	0.949374	1.06781	0.97599	0.973302	1.09604	1.02651	0.976842	0.93162	1.10731	1.04158	1.09406	0.980671	0.980036	1.00867	0.0140042	16
97.5	1.01112	0.969708	1.01713	0.95723	1.0669	0.953625	0.965787	1.0689	1.07673	0.977035	0.929136	1.10358	1.03481	1.09008	0.969098	1.01309	1.01275	0.0138029	16
100	1.0124	0.972307	1.02293	0.964761	1.0389	0.957825	0.95357	1.08256	1.03683	0.980878	0.935343	1.09526	1.0367	1.0902	0.95572	0.966089	1.00639	0.0132082	16
102.5	1.01617	0.983221	1.02683	0.933151	1.0502	0.947318	0.970992	1.09122	1.08446	0.980934	0.95111	1.08933	1.03781	1.08991	0.956028	0.990978	1.01248	0.0140081	16
105	1.01294	0.976184	1.02554	0.944548	1.04223	0.965309	0.98252	1.06345	1.03306	0.985266	0.96713	1.09326	1.02607	1.11189	0.950373	0.984734	1.01028	0.0124284	16
107.5	1.00174	0.971817	1.02614	0.934193	1.06066	0.95876	0.970367	1.06654	1.0467	0.978193	0.962119	1.08607	1.0417	1.09111	0.949778	0.981467	1.00796	0.012892	16
110	1.00125	0.978422	1.02546	0.948247	1.04935	0.965822	0.976301	1.08521	1.04893	0.985789	0.969552	1.08095	1.05212	1.08594	0.947838	0.977672	1.01118	0.0123523	16
112.5	0.99783	0.98222	1.03904	0.957134	1.04124	0.969824	0.9674	1.07023	1.02589	0.981628	0.961051	1.07351	1.02687	1.08378	0.936657	0.976797	1.00569	0.0115453	16
115	0.99719	0.987663	1.02957	0.942039	1.05865	0.963191	0.971308	1.0631	1.03572	0.979458	0.944914	1.06904	1.03612	1.08479	0.941044	0.994596	1.00615	0.0120562	16
117.5	1.00074	0.984998	1.02984	0.938752	1.03937	0.971419	0.953226	1.06751	1.04167	0.973968	0.958635	1.07286	1.01484	1.09506	0.932966	0.971916	1.00298	0.0125513	16
120	0.989246	0.987668	1.03161	0.941529	1.04368	0.987588	0.954724	1.06324	1.01222	0.97842	0.953964	1.05813	1.05291	1.07753	0.9389	0.976394	1.00298	0.0115233	16
122.5	0.980946	0.978741	1.03387	0.94955	1.0704	0.969124	0.935884	1.05174	1.00525	0.985729	0.937741	1.06629	1.04437	1.08174	0.939635	0.985407	1.00103	0.0126156	16
125	0.983659	0.982151	1.04969	0.919114	1.0623	0.975999	0.966568	1.04917	1.01389	0.974951	0.92933	1.07587	1.04994	1.08602	0.934839	0.976566	1.00188	0.0135081	16
127.5	0.974569	0.993637	1.04474	0.924259	1.07456	0.982782	0.941117	1.06676	1.04056	0.988248	0.952102	1.07457	1.0541	1.08719	0.921503	0.989685	1.0069	0.0141243	16
130	0.972318	0.981144	1.0366	0.910603	1.06812	0.997544	0.930767	1.06763	1.03736	0.985686	0.960932	1.07732	1.02513	1.08983	0.922769	0.962101	1.00162	0.0143807	16
132.5	0.979045	0.98565	1.04023	0.907435	1.0525	0.992197	0.906438	1.05215	1.04909	0.995562	0.958442	1.07186	1.06104	1.08853	0.924841	0.971233	1.00226	0.014776	16
135	0.970561	0.97951	1.03342	0.910628	1.06867	0.99315	0.926173	1.05592	1.05783	0.97597	0.970611	1.06274	1.04983	1.09559	0.938952	0.968327	1.00362	0.0142293	16
137.5	0.962116	0.9817	1.04116	0.884668	1.06041	0.979018	0.925335	1.05754	1.05105	0.982317	0.968592	1.07376	1.05656	1.09781	0.923956	0.988378	1.00215	0.0155051	16
140	0.964782	0.982863	1.03996	0.909903	1.08013	0.994127	0.940924	1.07093	1.08865	0.987116	0.96549	1.06807	1.05248	1.1001	0.934376	0.971703	1.00948	0.0153459	16
142.5	0.958366	0.979405	1.04698	0.918409	1.08526	0.983654	0.930655	1.04616	1.06251	0.989888	0.971683	1.08103	1.04252	1.09761	0.928761	0.977946	1.0063	0.0148794	16
145	0.96786	0.980657	1.03833	0.908323	1.08328	0.992963	0.924215	1.04517	1.0664	0.98979	0.961753	1.08939	1.0488	1.09794	0.927722	0.991349	1.00712	0.0153402	16
147.5	0.951187	0.982212	1.03389	0.883621	1.07547	0.986994	0.931531	1.05186	1.09181	1.001	0.983241	1.06843	1.06236	1.07674	0.9242	0.959385	1.004	0.0159353	16
150	0.955005	0.990255	1.04616	0.894914	1.07623	0.99262	0.947535	1.05728	1.11907	0.998913	0.992569	1.05476	1.04322	1.08237	0.915905	0.974087	1.00881	0.0157562	16
152.5	0.957581	0.985073	1.03552	0.913524	1.07061	0.978591	0.949451	1.04794	1.13315	0.993875	1.00925	1.07205	1.04858	1.09261	0.918792	0.969077	1.01098	0.0158984	16
155	0.952982	0.984879	1.03252	0.893386	1.09463	0.996143	0.945885	1.06794	1.10166	1.00177	0.965731	1.07351	1.0604	1.09283	0.927712	0.966542	1.00991	0.0164991	16
157.5	0.96253	0.985015	1.02263	0.894934	1.08988	0.986579	0.923243	1.09556	1.10312	0.99899	0.974263	1.05419	1.07955	1.09646	0.924343	0.971666	1.01018	0.0172234	16
160	0.956842	0.979197	1.02852	0.894024	1.07426	0.997068	0.939485	1.09007	1.12069	1.01815	0.986857	1.05975	1.07832	1.09247	0.924949	0.965561	1.01289	0.0169705	16
162.5	0.958562	0.982921	1.02461	0.890942	1.07462	0.983528	0.959725	1.11119	1.13599	1.01276	0.981003	1.05167	1.09696	1.0942	0.907459	0.976545	1.01517	0.018226	16
165	0.954046	0.98742	1.03109	0.891074	1.09119	0.966891	0.966085	1.11721	1.14429	1.01345	0.990115	1.07487	1.06067	1.10774	0.921249	0.970747	1.01801	0.018626	16
167.5	0.966919	0.979731	1.0342	0.894968	1.09946	0.999449	0.95966	1.10622	1.11346	1.0261	1.01264	1.07376	1.07288	1.12108	0.921766	0.976229	1.02241	0.0175936	16
170	0.966917	0.987283	1.03174	0.91243	1.09325	0.986003	0.928459	1.13126	1.11495	1.02115	0.992958	1.072	1.07542	1.09628	0.906761	0.964372	1.01758	0.0182624	16
172.5	0.963482	0.990961	1.01975	0.892479	1.08965	0.998213	0.979637	1.13039	1.12723	1.01979	0.999287	1.07906	1.09294	1.11097	0.910358	0.985192	1.02434	0.0184146	16
175	0.988344	0.984491	1.02603	0.926334	1.07841	0.990572	0.970757	1.15489	1.10538	1.00931	1.00589	1.07082	1.0924	1.10282	0.925428	0.981391	1.02583	0.0168508	16
177.5	0.982976	0.986016	1.02243	0.913318	1.07267	0.989964	0.966417	1.14029	1.07499	1.01427	1.00312	1.07391	1.10777	1.11605	0.916626	0.980429	1.02258	0.017109	16
180	1.00358	0.982543	1.02089	0.927613	1.0656	0.973673	0.961308	1.15642	1.09417	1.0422	0.994293	1.08226	1.11301	1.139	0.905901	0.99666	1.0287	0.0185055	16
182.5	0.99711	0.986156	1.03004	0.925679	1.0881	0.961413	0.979877	1.17539	1.10266	1.03026	0.991173	1.0766	1.09904	1.12834	0.90987	0.993116	1.02968	0.0187974	16
185	1.00579	0.979185	1.02856	0.919212	1.07828	0.978553	0.975739	1.17266	1.08047	1.02023	0.992354	1.07503	1.10482	1.13412	0.891032	0.991906	1.02675	0.0190218	16
187.5	1.0159	0.98034	1.03898	0.938013	1.0824	0.973568	0.991343	1.15405	1.11584	1.02826	0.978282	1.07162	1.09879	1.14092	0.907871	0.989107	1.03158	0.0181867	16
190	1.00837	0.984425	1.04722	0.935811	1.05919	0.98585	0.974558	1.15669	1.13113	1.01543	0.986323	1.06939	1.10755	1.14038	0.899264	0.986816	1.03052	0.0187844	16
192.5	1.01538	0.99012	1.04354	0.925273	1.0766	0.978641	1.00279	1.15129	1.14721	1.0293	0.997576	1.06834	1.10104	1.13108	0.88462	1.01424	1.03482	0.0189024	16
195	1.01524	0.984977	1.04424	0.94542	1.08118	0.983279	0.989638	1.1659	1.16518	1.01191	0.994589	1.07006	1.10364	1.13361	0.896851	1.00742	1.03707	0.0193173	16
197.5	1.02089	0.974426	1.04113	0.955664	1.0729	0.993527	1.00695	1.15702	1.1117	1.01883	0.970667	1.06556	1.131	1.13546	0.901631	1.01117	1.03553	0.0180172	16
200	1.02151	0.981358	1.04744	0.949151	1.07966	0.972398	0.997546	1.1624	1.11155	1.01533	0.995375	1.06469	1.1103	1.12631	0.89753	1.02499	1.03485	0.0177759	16
202.5	1.02165	0.987201	1.04807	0.975065	1.07914	0.96606	0.989217	1.13474	1.10242	1.01692	0.966058	1.0588	1.1127	1.12788	0.900917	1.02729	1.03213	0.0167996	16
205	1.0237	0.985977	1.05577	0.974486	1.06969	0.974045	0.994264	1.14223	1.11419	1.02377	0.971692	1.06651	1.11477	1.13603	0.903364	1.00693	1.03484	0.0171735	16
207.5	1.02692	0.988302	1.04646	0.944974	1.07403	0.947964	0.974871	1.11785	1.10698	1.02079	0.955014	1.06639	1.10045	1.14073	0.898469	1.02843	1.02741	0.0178012	16
210	1.01721	0.981168	1.04176	0.944814	1.0718	0.969572	0.986086	1.14163	1.07863	1.02048	0.945443	1.07298	1.12178	1.13667	0.898968	1.01741	1.0279	0.0180559	16
212.5	1.01081	0.987239	1.05199	0.964574	1.06639	0.956257	0.987275	1.13543	1.09789	1.01636	0.966352	1.07692	1.07618	1.14498	0.898772	1.02068	1.02863	0.01712	16
215	1.00863	0.982557	1.04868	0.957996	1.08107	0.973606	0.984392	1.14026	1.08835	1.00934	0.94909	1.07549	1.10166	1.12958	0.912885	1.04207	1.03035	0.0170324	16
217.5	1.01624	0.978838	1.04601	0.951549	1.06373	0.95284	0.970191	1.15261	1.11194	1.01893	0.954971	1.08787	1.10513	1.144	0.91338	1.04346	1.03198	0.018607	16
220	0.998476	0.984239	1.05246	0.960222	1.06623	0.981195	0.998711	1.12692	1.11194	1.011	0.96027	1.07996	1.10737	1.15168	0.928676	1.01619	1.03347	0.0168347	16
222.5	1.00336	0.985848	1.04418	0.952893	1.07144	0.970611	0.984705	1.1238	1.13296	1.01451	0.96591	1.08221	1.11063	1.16407	0.928122	1.02984	1.03532	0.017909	16
225	1.01208	0.992411	1.05437	0.943736	1.05697	0.971799	0.998784	1.13229	1.15141	1.01792	0.9593	1.08783	1.13561	1.14172	0.926749	1.03367	1.03854	0.0184495	16
227.5	1.00993	0.988548	1.05109	0.948741	1.07606	0.962604	0.955796	1.12719	1.13676	1.03084	0.9632	1.08056	1.10025	1.12902	0.925482	1.02881	1.03218	0.0176529	16
230	1.00289	0.987055	1.03519	0.936688	1.07456	0.953438	0.977057	1.13596	1.1262	1.0259	0.942952	1.07812	1.11182	1.13394	0.92364	1.03082	1.02976	0.0183901	16
232.5	0.994102	0.984259	1.03269	0.924445	1.0711	0.951715	0.952261	1.11282	1.12554	1.03195	0.959749	1.08773	1.12503	1.13693	0.926569	1.01995	1.0273	0.0186859	16
235	0.992654	0.98906	1.04626	0.915944	1.07045	0.974846	0.975819	1.12361	1.09973	1.02453	0.960976	1.07131	1.13047	1.14211	0.915818	1.02564	1.0287	0.0182321	16
237.5	0.98818	0.978964	1.04919	0.913985	1.07472	0.963258	0.972198	1.12836	1.09655	1.02076	0.939001	1.08385	1.11099	1.16104	0.930896	1.02255	1.02716	0.01902	16
240	0.991311	0.985875	1.04931	0.918531	1.07132	0.97234	0.961591	1.13225	1.11426	1.02503	0.96566	1.07451	1.11732	1.15431	0.925857	1.01312	1.02954	0.0186929	16
242.5	0.992504	0.982266	1.04634	0.922389	1.06373	0.957514	0.971703	1.13108	1.1395	1.04222	0.959946	1.08372	1.12237	1.1504	0.92768	1.03199	1.03284	0.0192405	16
245	0.986831	0.981121	1.04318	0.902666	1.08453	0.966031	0.965762	1.09696	1.11495	1.0231	0.968207	1.0743	1.11523	1.1748	0.922214	1.0373	1.02857	0.0192821	16
247.5	0.99632	0.975211	1.04931	0.908825	1.08026	0.944921	1.00037	1.12939	1.13385	1.02255	0.980514	1.08677	1.09556	1.14695	0.927856	1.01949	1.03113	0.0187886	16
250	0.983652	0.983941	1.04488	0.912212	1.07648	0.94753	0.948578	1.12801	1.16989	1.03759	0.967056	1.08677	1.10532	1.14942	0.944951	1.01831	1.03154	0.0201701	16
252.5	0.985863	0.98513	1.04515	0.89763	1.07306	0.96362	0.959376	1.13686	1.15872	1.0464	0.974329	1.09683	1.11942	1.14753	0.923234	1.02695	1.03376	0.0205927	16
255	0.985028	0.973906	1.04539	0.933906	1.09157	0.952968	0.952061	1.14342	1.13722	1.03036	0.981941	1.07849	1.1101	1.14706	0.915284	1.02681	1.03159	0.019654	16
257.5	0.977441	0.988733	1.05112	0.914625	1.08232	0.977512	0.963768	1.13016	1.15916	1.03285	0.969661	1.08372	1.14548	1.14402	0.922868	1.02229	1.03536	0.0202859	16
260	0.977659	0.972949	1.04824	0.89847	1.08853	0.969786	0.956586	1.13692	1.1403	1.03259	0.988043	1.08843	1.11154	1.13806	0.919304	1.02831	1.03098	0.0199388	16
262.5	0.984388	0.983013	1.04678	0.891271	1.09012	0.976545	0.974693	1.12708	1.12918	1.0261	0.981937	1.10576	1.12279	1.15259	0.909845	1.02643	1.03303	0.0202703	16
265	0.973024	0.986037	1.05494	0.873255	1.10056	0.976134	0.978055	1.14235	1.1376	1.03256	0.989678	1.09666	1.11563	1.16292	0.918199	1.02455	1.03513	0.0212455	16
267.5	0.967198	0.989431	1.04715	0.891544	1.10808	0.974604	0.94118	1.13161	1.17905	1.03336	0.986678	1.10057	1.12767	1.16809	0.915909	1.02127	1.03646	0.0225969	16
270	0.960253	0.985711	1.04165	0.895375	1.09391	0.953387	0.961895	1.15466	1.16317	1.03901	0.974842	1.09621	1.0995	1.13531	0.915348	1.01412	1.03027	0.0213869	16
272.5	0.973109	0.993867	1.04952	0.897256	1.09653	0.949397	0.973875	1.13999	1.16559	1.03787	0.990243	1.11155	1.13792	1.15822	0.910641	1.0251	1.03817	0.0220494	16
275	0.959658	0.98619	1.03974	0.887224	1.11168	0.967641	0.943508	1.13568	1.14214	1.03558	0.983274	1.11267	1.12317	1.14845	0.923047	1.01099	1.03192	0.0216635	16
277.5	0.957275	0.998334	1.05125	0.897803	1.08587	0.963494	0.950479	1.13985	1.15725	1.02648	0.971495	1.10502	1.10943	1.15981	0.915247	1.01873	1.03174	0.021585	16
280	0.950336	1.00001	1.05252	0.874347	1.09474	0.983893	0.946641	1.14189	1.1706	1.03075	0.978739	1.11093	1.1107	1.15506	0.911542	0.993063	1.03161	0.0227506	16
282.5	0.943643	1.00176	1.04873	0.884717	1.09837	0.981484	0.969078	1.14751	1.13374	1.03247	0.969046	1.09637	1.10217	1.13454	0.899992	1.01082	1.0284	0.0210668	16
285	0.947303	1.00295	1.05228	0.890929	1.08393	0.96338	0.953379	1.13878	1.12901	1.02465	0.979672	1.10835	1.10343	1.15232	0.915655	0.998465	1.02778	0.0209467	16
287.5	0.951237	0.999964	1.05169	0.898536	1.07814	0.95729	0.954918	1.14355	1.14115	1.03482	0.970954	1.11299	1.10879	1.14636	0.906643	1.00074	1.02861	0.0213632	16
290	0.943729	1.00716	1.05134	0.903555	1.07234	0.966396	0.940239	1.15036	1.16829	1.01153	0.991041	1.12598	1.11617	1.15894	0.905344	0.986968	1.03121	0.0227673	16
292.5	0.94451	1.00592	1.05105	0.891995	1.0729	0.976849	0.936464	1.14757	1.14364	1.02287	0.990524	1.10532	1.10311	1.15776	0.903517	1.00802	1.02888	0.0216927	16
295	0.948155	1.01158	1.04843	0.920253	1.07488	0.960611	0.941965	1.1609	1.16896	1.02362	0.986139	1.10378	1.09426	1.16732	0.894896	0.997838	1.03148	0.0223695	16
297.5	0.945643	1.00704	1.05336	0.92528	1.05178	0.962455	0.948661	1.1656	1.14	1.01476	0.985677	1.11748	1.11161	1.18579	0.897478	0.996279	1.03181	0.022428	16
300	0.947196	1.00732	1.05095	0.89758	1.06502	0.967487	0.950236	1.18047	1.16471	1.00658	1.00741	1.11648	1.09858	1.15243	0.891926	1.00498	1.03184	0.0228671	16
302.5	0.942947	1.01713	1.04509	0.937084	1.06261	0.967357	0.961475	1.1831	1.16053	1.02465	0.996213	1.11403	1.10301	1.1712	0.91058	1.00633	1.03771	0.0218077	16
305	0.963352	1.01226	1.04057	0.920657	1.04731	0.958789	0.951331	1.19428	1.16098	1.02922	1.00398	1.1217	1.08877	1.18261	0.893705	0.995141	1.03529	0.0230671	16
307.5	0.955004	1.01123	1.04678	0.927215	1.05354	0.983357	0.979312	1.19065	1.18119	1.02192	0.984919	1.11583	1.09738	1.19075	0.893107	1.00901	1.04007	0.023111	16
310	0.960868	1.00116	1.03949	0.92397	1.0583	0.983126	0.959033	1.20702	1.16318	1.02055	0.993839	1.12309	1.12504	1.20428	0.89599	0.991496	1.04065	0.024251	16
312.5	0.957813	1.00417	1.04472	0.948054	1.05961	0.958768	0.949285	1.21027	1.17514	1.00948	1.00496	1.12194	1.08644	1.19123	0.883255	0.994859	1.0375	0.0240996	16
315	0.964914	1.00425	1.04245	0.935135	1.05747	0.959382	0.971967	1.22571	1.17033	1.01268	0.996047	1.11697	1.04783	1.17818	0.903201	0.996601	1.03645	0.0231823	16

## Sheet: VAPDKO + PH
PI4P Removal from Golgi
HeLa VAPB DKO + PH domain OSBP
Experiments:
200206_Optogenetics
200313_PI4POpto
Measure: (FROI-FBkg)/(FWholeCell-FBkg) Normalized for F measured at t1
Time	Cell1	Cell2	Cell3	Cell4	Cell5	Cell6	Cell7	Cell8	Cell9	Cell10	Cell11	Cell12	Cell13	Cell14	Cell15	Cell16	Cell17	Average	ES	N
0	1	1	1	1	1	1	1	1	1	1	1	1	1	1	1	1	1	1	0	17
2.5	0.999191	1.0053	0.994427	1.00373	1.00219	0.988112	1.01091	0.995868	1.00608	0.964497	0.984201	0.976543	0.976272	1.00977	0.990617	0.974776	1.00209	0.99321	0.00335221	17
5	1.01582	1.0011	0.994812	1.00361	0.974851	0.981878	1.0269	0.966128	0.99834	0.961483	0.984331	0.960841	0.972813	1.01874	0.941563	0.963038	0.988426	0.98557	0.00570544	17
7.5	1.02122	1.00905	0.99004	1.02978	0.989914	0.967547	1.01909	0.952112	1.00098	0.969894	1.02066	0.962284	0.961962	0.99912	0.937453	0.981715	0.980627	0.98785	0.0065438	17
10	1.00759	1.01507	0.98769	1.01061	0.990568	0.972585	1.02065	0.949823	1.01052	0.984797	1.00703	0.961023	0.992755	0.993089	0.936262	0.971385	0.994095	0.988561	0.00576377	17
12.5	1.00268	1.0117	0.988926	1.00126	1.00046	0.982885	1.02131	0.971826	1.01965	0.969552	1.01671	0.993469	0.975728	0.98991	0.915039	0.963349	1.02025	0.990866	0.00655546	17
15	1.00289	1.00617	0.983636	0.987679	0.995108	0.987646	1.02734	0.977708	1.02308	0.955832	1.01947	0.994864	0.977319	1.00148	0.947535	0.9614	1.01663	0.992104	0.00567222	17
17.5	0.998526	1.00129	0.97631	1.01195	0.999484	0.97306	1.01147	0.95662	1.00419	0.987909	0.999878	0.983403	0.981351	0.986744	0.966628	0.980737	1.00453	0.989651	0.00387991	17
20	0.989438	1.00692	0.988389	1.01533	0.99857	0.981429	0.98827	0.961337	1.00074	0.975012	1.03679	0.987617	0.951308	1.00479	0.975092	0.981082	1.02609	0.992247	0.00531065	17
22.5	0.986721	1.00704	0.987287	1.01034	1.00245	0.979471	0.986459	0.956557	1.00268	0.95327	1.00501	0.999694	0.931827	1.00991	0.9532	0.959409	1.00204	0.984316	0.00594537	17
25	0.989188	1.01086	0.989732	1.02208	1.00689	0.983397	1.00773	0.952856	0.995772	0.935184	1.01745	0.967058	0.923595	1.03715	0.984247	0.998193	0.979034	0.988259	0.0073282	17
27.5	1.00371	1.00477	0.993748	1.03938	1.02929	0.988078	1.00015	0.941358	0.99372	0.92953	0.993781	0.976168	0.949324	1.02513	0.982483	0.994855	0.968623	0.989065	0.00721587	17
30	1.00289	1.00617	0.983636	0.987679	0.995108	0.987646	1.02734	0.938105	1.01383	0.927167	1.02234	0.967115	0.953655	1.05813	0.974176	0.998264	0.963956	0.988659	0.00804553	17
32.5	0.998526	1.00129	0.97631	1.01195	0.999484	0.97306	1.01147	0.928971	1.02347	0.9635	1.02263	0.959604	0.947741	1.05968	0.977561	1.00566	0.951597	0.988971	0.00807616	17
35	0.989438	1.00692	0.988389	1.01533	0.99857	0.981429	0.98827	0.945007	1.01708	0.964267	1.02606	0.98027	0.962794	1.04604	0.961489	1.01373	0.965644	0.991219	0.00656412	17
37.5	0.986721	1.00704	0.987287	1.01034	1.00245	0.979471	0.986459	0.950273	1.02357	0.942636	1.0337	0.951173	0.967677	1.07786	0.967706	0.998911	0.950748	0.989648	0.00851012	17
40	0.989188	1.01086	0.989732	1.02208	1.00689	0.983397	1.00773	0.937611	1.02971	0.928833	1.03253	0.982349	0.951199	1.09448	0.969621	1.00304	0.942883	0.993066	0.00998267	17
42.5	0.977053	0.999727	1.00413	1.0325	1.03219	0.981452	0.990597	0.967797	1.03155	0.93128	1.02678	0.951431	0.951315	1.10432	0.965592	1.02949	0.953661	0.995934	0.0105149	17
45	0.977852	0.999376	1.00823	1.02469	1.00961	0.972829	0.990817	0.96034	1.02522	0.909546	1.04259	0.995763	0.95789	1.11932	0.972733	1.01254	0.942986	0.995431	0.0111988	17
47.5	0.983498	1.00392	1.01249	1.03837	1.00774	0.973508	0.982065	0.956329	1.0208	0.919755	1.03123	0.996325	0.956703	1.09345	0.998964	1.0383	0.930088	0.996678	0.010422	17
50	0.987713	1.00423	1.00448	1.03065	1.01567	0.966041	0.996563	0.945741	1.03292	0.896534	1.0142	0.970391	0.928564	1.12924	0.975634	1.01035	0.937161	0.990946	0.0126333	17
52.5	0.989471	1.00701	1.01323	1.01978	1.02068	0.962232	0.999684	0.955774	1.02199	0.883284	1.04009	0.969965	0.900557	1.11512	0.952246	1.01592	0.919589	0.987449	0.0136415	17
55	0.974164	1.02826	1.0194	1.04499	1.01587	0.953615	1.00911	0.938885	1.01263	0.853551	1.02937	0.984782	0.885758	1.13865	0.979832	1.03504	0.937648	0.99068	0.0159399	17
57.5	0.980409	1.02253	1.01147	1.05113	1.01466	0.954672	1.00149	0.945616	1.01591	0.846229	1.03655	0.99172	0.947437	1.12686	0.946988	1.02557	0.917742	0.990411	0.0150603	17
60	0.991472	1.01085	1.00323	1.05753	1.0202	0.956148	0.990658	0.955395	0.999652	0.866396	1.00954	0.991071	0.95619	1.12323	0.960287	1.03651	0.925667	0.991414	0.0135888	17
62.5	0.976205	1.01205	0.997264	1.05455	1.00272	0.960372	0.987903	0.966012	1.01223	0.833705	1.01837	1.0159	0.948973	1.11927	0.943871	1.04167	0.925004	0.989179	0.0148914	17
65	0.979263	1.00927	1.00227	1.07577	0.988866	0.95911	0.995548	0.965497	1.01717	0.828038	1.01828	0.999526	1.03536	1.11862	0.958087	1.05634	0.938777	0.996811	0.0152545	17
67.5	0.999146	1.00855	1.00241	1.08349	0.980692	0.960493	0.984373	0.949831	0.997817	0.820638	1.029	0.981079	0.986386	1.08778	0.968507	1.06642	0.932784	0.990553	0.0150263	17
70	0.993384	1.00763	1.00191	1.09577	0.983957	0.944845	0.98716	0.932362	1.01497	0.805863	1.02921	0.978933	0.949445	1.07904	0.971499	1.07905	0.922858	0.986934	0.016654	17
72.5	0.96475	1.01052	0.986813	1.1034	0.97153	0.938556	0.978023	0.937205	1.01842	0.821737	0.996156	1.00872	0.989447	1.09208	0.978253	1.1048	0.908054	0.988733	0.0171262	17
75	0.977175	1.01312	0.992947	1.10271	0.968163	0.943655	0.984786	0.941274	1.01683	0.808464	1.01413	1.00615	0.98785	1.09446	0.943118	1.11106	0.918836	0.98969	0.0177596	17
77.5	0.963962	1.00961	1.01295	1.11384	0.975342	0.95235	0.991441	0.963011	1.00981	0.805227	1.01306	1.02514	0.998637	1.06574	0.977668	1.12021	0.904079	0.99424	0.0177382	17
80	0.976384	1.01547	1.0037	1.10034	0.966958	0.950093	0.984149	0.97299	1.02409	0.784721	1.01129	0.987516	1.01459	1.0768	0.998585	1.07596	0.929739	0.992552	0.0169914	17
82.5	0.961216	1.00845	1.01053	1.14068	0.965214	0.948754	0.982043	0.950486	1.03749	0.777957	1.00036	0.984343	0.968322	1.06953	0.977213	1.09959	0.900476	0.987214	0.0194067	17
85	0.953238	1.00843	1.0028	1.14904	0.967217	0.953078	0.962485	0.936336	1.01678	0.771376	1.03273	1.0098	0.987247	1.06449	0.954272	1.09124	0.908973	0.986443	0.0198184	17
87.5	0.958886	1.01255	1.00698	1.13875	0.97499	0.953324	0.965366	0.955697	1.01173	0.768824	1.02582	0.987206	1.01378	1.07494	0.972333	1.10018	0.893707	0.989122	0.0198727	17
90	0.973466	1.01053	0.998401	1.13573	0.963107	0.945544	0.956572	0.955385	1.01666	0.752838	1.01809	1.0165	0.97512	1.06909	0.956525	1.12686	0.911977	0.9872	0.0208061	17
92.5	0.979184	1.01043	1.00105	1.13965	0.954972	0.955681	0.978563	0.970787	1.00885	0.7666	0.995034	1.00847	0.96824	1.07253	0.962462	1.09432	0.906827	0.986686	0.0193879	17
95	0.979418	1.00882	1.00726	1.13257	0.957767	0.95563	0.972707	0.95747	1.01716	0.738228	0.994178	0.998236	0.961594	1.06456	0.945923	1.09086	0.901234	0.98139	0.0204707	17
97.5	1.01297	1.02929	0.993571	1.12735	0.984867	0.955741	0.969038	0.975867	1.02599	0.725084	0.987878	0.981322	1.00277	1.0779	0.951454	1.08086	0.893163	0.986771	0.0211065	17
100	0.999467	1.02681	1.00063	1.1408	0.992092	0.938764	0.966823	0.947814	1.0324	0.744326	0.970329	0.979235	1.01693	1.07318	0.968229	1.10993	0.885551	0.987842	0.0214573	17
102.5	0.997128	1.0237	1.00073	1.12974	0.988837	0.938469	0.966186	0.957964	1.02433	0.72586	0.97342	0.998855	1.00055	1.05275	0.950908	1.10548	0.893315	0.984013	0.0213543	17
105	0.9916	1.02189	0.992487	1.13006	1.00772	0.956164	0.955096	0.947397	1.02225	0.747497	0.984487	0.98922	1.02785	1.08126	0.958773	1.11228	0.894184	0.989425	0.0209936	17
107.5	0.991546	1.02898	0.985816	1.13419	1.00519	0.95918	0.963096	0.950306	1.03525	0.755919	0.965897	0.990549	0.994428	1.092	0.977784	1.0701	0.902658	0.988405	0.0199085	17
110	1.00801	1.03322	0.987807	1.1246	1.01279	0.947994	0.980936	0.930135	1.02842	0.730593	0.993619	0.993738	1.02228	1.07378	0.978457	1.0935	0.905215	0.990888	0.0211038	17
112.5	1.00843	1.03042	0.981588	1.12596	1.01735	0.939311	0.991732	0.94296	1.02267	0.767855	0.990839	0.971488	1.00004	1.08018	0.980415	1.1054	0.922394	0.992884	0.0194494	17
115	0.992832	1.02285	0.979829	1.0959	1.00805	0.942707	0.991459	0.945585	1.01365	0.761173	0.989894	0.987173	1.0201	1.10305	0.972914	1.07454	0.907742	0.988791	0.018956	17
117.5	0.994316	1.02576	0.971509	1.1247	1.01302	0.947051	0.995963	0.936067	1.00234	0.761339	0.994952	0.998524	0.995516	1.09143	0.967606	1.08029	0.915744	0.989184	0.0193756	17
120	0.999842	1.02032	0.964733	1.12303	1.01478	0.951497	1.00556	0.936109	0.992507	0.749926	0.988604	0.968987	0.982873	1.12522	0.97415	1.02731	0.902255	0.983982	0.0200862	17
122.5	0.989553	1.01638	0.973592	1.10975	1.02083	0.94292	1.00067	0.930452	0.991561	0.754863	0.996534	0.997733	0.987432	1.08732	0.963272	1.02454	0.927479	0.983228	0.0183951	17
125	1.00594	1.02147	0.968568	1.10257	1.04378	0.950882	0.999175	0.919411	0.987542	0.762198	0.990807	0.974915	0.966179	1.09845	1.01974	1.03708	0.923988	0.98663	0.0187464	17
127.5	1.0082	1.01809	0.972637	1.10021	1.02382	0.945283	0.983316	0.922402	0.987558	0.76216	1.00442	0.969672	0.975947	1.12364	1.00077	1.00097	0.901729	0.982402	0.0190751	17
130	1.00542	1.02191	0.966399	1.11553	1.03062	0.941264	0.996781	0.936749	0.987288	0.792372	0.984016	0.993415	0.985061	1.12119	1.00065	1.01413	0.920721	0.98903	0.0178128	17
132.5	1.01102	1.02053	0.963621	1.10035	1.02511	0.957693	0.985411	0.945969	0.992589	0.809386	1.01823	0.980138	0.960772	1.11143	0.986951	0.990562	0.949571	0.988784	0.015953	17
135	1.00617	1.02676	0.966233	1.08502	1.03362	0.958268	0.994918	0.916148	0.999065	0.788561	0.992971	0.961434	0.952525	1.12919	0.968828	0.985739	0.948606	0.98318	0.0174943	17
137.5	1.02321	1.02591	0.962441	1.08816	1.02907	0.952771	1.01084	0.910079	0.982795	0.820086	0.979124	0.971655	0.950122	1.13446	1.024	0.99654	0.920893	0.987186	0.017171	17
140	1.01054	1.03034	0.951566	1.10153	1.03973	0.949955	1.01401	0.913535	0.988098	0.823148	0.994111	0.953738	0.913874	1.10723	1.01108	1.01726	0.925535	0.985017	0.0171607	17
142.5	1.00857	1.02883	0.940947	1.08879	1.05463	0.95099	1.00965	0.926483	1.01806	0.827864	0.989693	0.987008	0.944118	1.0803	0.991876	1.02338	0.938645	0.988814	0.0154839	17
145	1.01518	1.03226	0.940902	1.1029	1.05378	0.952263	1.01387	0.911918	1.00388	0.863979	1.01477	0.959555	0.917961	1.12816	0.98199	0.996151	0.931904	0.989495	0.0166163	17
147.5	1.03339	1.03229	0.939209	1.10066	1.06177	0.962637	1.02231	0.90837	0.985995	0.887657	1.00301	0.984377	0.907783	1.1129	0.995304	1.02266	0.922314	0.993096	0.0160619	17
150	1.03137	1.03611	0.928572	1.09973	1.07051	0.952337	1.02838	0.900083	0.988041	0.906879	0.991688	0.978117	0.933192	1.10979	0.999912	1.01945	0.926403	0.99415	0.0156314	17
152.5	1.04314	1.03701	0.933587	1.0988	1.05526	0.938814	1.02841	0.910582	0.987427	0.903849	0.981444	0.950746	0.912884	1.12474	0.996331	1.01868	0.932305	0.991412	0.0162717	17
155	1.04183	1.0308	0.924833	1.10129	1.05904	0.944703	1.04908	0.907864	0.991166	0.930037	0.98237	0.988935	0.914156	1.16739	1.0027	1.02662	0.967403	1.00178	0.0169959	17
157.5	1.03445	1.02831	0.925469	1.08018	1.04945	0.947195	1.04882	0.900411	0.988546	0.961802	1.01949	1.01152	0.922901	1.17511	0.993949	1.01424	0.9403	1.00248	0.0164849	17
160	1.03641	1.01918	0.928493	1.07056	1.02942	0.937083	1.04081	0.907865	0.991544	0.922911	0.995868	0.979233	0.907448	1.13018	0.992241	0.995473	0.922752	0.988676	0.0151716	17
162.5	1.02302	1.01711	0.924589	1.07746	1.0353	0.946588	1.05977	0.906469	1.0021	0.924701	1.00884	0.961609	0.91752	1.11989	1.01518	1.01198	0.926995	0.99289	0.0151192	17
165	1.00616	1.01637	0.9276	1.08794	1.04259	0.946468	1.05534	0.917497	1.00292	0.928705	1.00383	0.997165	0.923212	1.11969	1.01175	1.00106	0.928134	0.995086	0.0146103	17
167.5	1.01024	1.02088	0.934722	1.07697	1.04494	0.934659	1.04938	0.901292	1.01215	0.963293	0.977666	0.970965	0.924116	1.11308	0.980283	1.00529	0.928528	0.991086	0.0141882	17
170	1.00468	1.01892	0.93265	1.06451	1.0399	0.928157	1.05114	0.888941	1.01034	0.959619	1.00138	0.955944	0.904479	1.15017	1.01246	1.02899	0.914245	0.99215	0.0164317	17
172.5	1.00651	1.02016	0.936459	1.06189	1.04972	0.934322	1.02993	0.896308	0.998421	0.969402	1.00394	0.978708	0.903935	1.10859	0.996184	1.00417	0.923235	0.989523	0.0139901	17
175	1.0203	1.0232	0.928201	1.0752	1.03424	0.938485	1.01186	0.925353	1.01387	0.995594	1.0048	0.952889	0.924202	1.17717	1.00879	1.03097	0.924437	0.999387	0.0158996	17
177.5	1.03755	1.02585	0.943951	1.07776	1.02568	0.935447	1.02135	0.923431	1.01055	1.02913	1.02446	0.952548	0.917923	1.15924	0.953178	1.04455	0.905832	0.999319	0.0161962	17
180	1.01166	1.03191	0.936306	1.07353	1.02013	0.945556	1.01803	0.908043	1.00327	1.01922	1.01226	0.954633	0.922632	1.21383	0.972477	1.03316	0.925865	1.00015	0.0176172	17
182.5	1.0161	1.02941	0.942458	1.07627	0.996628	0.943697	1.01104	0.911641	1.01242	1.02974	1.02266	0.943216	0.918788	1.20412	0.986457	1.04602	0.918106	1.00052	0.0175107	17
185	1.00117	1.03118	0.938472	1.07582	0.991101	0.939591	1.01577	0.906804	1.01028	1.03769	1.04535	0.98204	0.912347	1.20514	1.03636	1.0257	0.935151	1.00529	0.0174216	17
187.5	1.01677	1.03329	0.940467	1.05052	0.976307	0.932736	1.02766	0.906039	0.99406	1.03678	1.03241	0.947958	0.948084	1.2093	1.02076	1.00967	0.932026	1.00087	0.0170364	17
190	0.98107	1.03323	0.934007	1.03553	0.977156	0.929609	1.03178	0.90832	1.00114	1.03291	1.03803	0.973393	0.92447	1.18886	1.02894	1.03264	0.95332	1.00026	0.0161183	17
192.5	0.976714	1.03421	0.939914	1.03611	0.967133	0.942132	1.03396	0.897289	0.992592	1.05162	1.03453	0.9569	0.92132	1.20544	1.05917	1.01728	0.942359	1.00051	0.0175778	17
195	0.950253	1.03667	0.942218	1.02743	0.952389	0.950858	1.03207	0.899797	1.00709	1.05708	1.03828	0.96149	0.937139	1.22653	1.0582	1.00774	0.964428	1.00292	0.018165	17
197.5	0.969795	1.04108	0.941828	1.01609	0.950967	0.953681	1.01704	0.899236	1.01611	1.05912	1.03711	0.969262	0.885911	1.21039	1.07589	1.0342	0.958679	1.00214	0.0185057	17
200	0.993083	1.03573	0.933763	1.01138	0.962514	0.967383	0.998947	0.897373	1.01217	1.07177	1.02758	0.951018	0.90468	1.22609	1.00752	1.02914	0.947094	0.998661	0.018309	17
202.5	0.991682	1.03055	0.932872	0.995682	0.939219	0.967308	1.00577	0.9067	1.02742	1.06011	1.06056	0.977236	0.88341	1.22318	1.03116	1.01162	0.97546	1.00117	0.0184575	17
205	0.979583	1.02986	0.939748	0.992963	0.918269	0.977709	1.00031	0.920592	1.01278	1.07536	1.02951	0.963947	0.920912	1.22258	1.01912	1.00377	0.956151	0.997833	0.0176261	17
207.5	0.97945	1.03053	0.932678	0.997267	0.920921	0.97836	0.998417	0.914096	1.02979	1.09827	1.0372	0.959454	0.940976	1.22073	1.00114	1.01052	0.981117	1.00182	0.0178009	17
210	0.971002	1.03182	0.937384	1.00447	0.94126	0.987775	0.992268	0.915984	1.02677	1.07972	1.06022	0.968152	0.901749	1.23913	0.978279	1.01158	0.98615	1.00198	0.0187663	17
212.5	0.966892	1.03148	0.93142	0.987447	0.924134	0.986346	0.976877	0.892033	1.036	1.0911	1.06572	0.945022	0.885422	1.23578	0.985869	1.02044	0.976448	0.996378	0.0202636	17
215	0.957337	1.02869	0.932157	0.957088	0.917591	0.996806	0.98685	0.885319	1.04098	1.08116	1.05412	0.976327	0.900504	1.23509	0.972616	1.01474	0.992943	0.995902	0.0198218	17
217.5	0.950256	1.02685	0.92845	0.942762	0.915667	1.01058	0.989742	0.90752	1.04414	1.0895	1.04355	0.96521	0.912404	1.22717	0.977127	1.05347	0.996381	0.998869	0.0194775	17
220	0.966265	1.02642	0.927482	0.93032	0.889809	1.00363	0.998498	0.896104	1.05557	1.07403	1.04228	0.963103	0.941152	1.20625	0.978243	1.04442	0.991201	0.996164	0.0186784	17
222.5	0.961697	1.02903	0.934867	0.943878	0.882827	0.999813	0.995646	0.893606	1.04352	1.08725	1.08236	0.980704	0.952238	1.21029	0.9849	1.04953	1.00062	1.00193	0.0192272	17
225	0.9547	1.02895	0.942138	0.945875	0.875592	1.00376	0.999059	0.882877	1.03823	1.08893	1.08317	0.971906	0.949843	1.26539	0.949873	1.02684	0.994275	1.00008	0.0220014	17
227.5	0.942127	1.04185	0.932901	0.947759	0.885399	1.00733	0.984235	0.877154	1.04358	1.07407	1.07636	0.963639	0.925714	1.21929	0.959423	1.02797	1.02115	0.995879	0.0202547	17
230	0.935483	1.03566	0.927948	0.935263	0.880738	1.0074	0.995214	0.898597	1.03168	1.07589	1.05354	0.981323	0.951652	1.2138	0.973591	1.04588	1.00409	0.996927	0.0191825	17
232.5	0.939392	1.04354	0.924988	0.933791	0.873467	1.01373	0.967412	0.890832	1.03444	1.07154	1.09827	0.953686	0.908161	1.20068	0.930287	1.03184	1.01188	0.989878	0.0206373	17
235	0.948766	1.04771	0.918305	0.928207	0.861258	1.02456	0.962334	0.86851	1.03179	1.06205	1.12086	0.966763	0.95619	1.23623	0.957571	1.05382	1.00245	0.996905	0.022535	17
237.5	0.948461	1.04302	0.923066	0.922977	0.866923	1.02844	0.963825	0.882936	1.03646	1.04807	1.1134	1.00365	0.912037	1.21989	0.963321	1.0516	1.00664	0.996161	0.0215481	17
240	0.941347	1.04554	0.937275	0.912539	0.863179	1.02853	0.941099	0.878924	1.03807	1.04741	1.08705	0.998823	0.940781	1.19496	0.93065	1.05645	0.994135	0.990398	0.0204737	17
242.5	0.948769	1.04158	0.932399	0.905715	0.846974	1.02632	0.948041	0.885828	1.05143	1.06314	1.10091	0.976769	0.966284	1.2251	0.926029	1.0233	1.02662	0.993836	0.022104	17
245	0.961344	1.04768	0.93783	0.890352	0.847371	1.02727	0.941908	0.881757	1.0606	1.0266	1.07583	0.99071	0.934056	1.2274	0.941798	1.06294	1.01909	0.992621	0.0222054	17
247.5	0.965961	1.04697	0.93895	0.87551	0.841868	1.02582	0.940553	0.891085	1.0643	1.03591	1.07833	1.00462	0.951928	1.20939	0.964211	1.05616	1.031	0.995445	0.0215604	17
250	0.989377	1.04797	0.942944	0.880805	0.850173	1.02015	0.948927	0.886801	1.08602	1.0365	1.09771	1.00175	0.961525	1.23192	0.934016	1.02704	1.02325	0.998052	0.0224644	17
252.5	0.969095	1.04898	0.946219	0.891136	0.847669	1.03418	0.95712	0.891283	1.07164	1.0098	1.08934	0.967503	0.95506	1.21263	0.95484	1.0391	1.01875	0.994373	0.0210923	17
255	0.972684	1.04998	0.949495	0.890045	0.860361	1.02872	0.96068	0.891099	1.08076	1.02488	1.08892	0.969229	0.94312	1.22779	0.974873	0.9906	1.01746	0.995335	0.0212985	17
257.5	0.964351	1.05099	0.95277	0.884284	0.847817	1.0453	0.958978	0.872875	1.07572	1.00945	1.10022	0.974305	0.925679	1.19175	0.926289	0.995424	1.04583	0.989531	0.021613	17
260	0.983454	1.05199	0.956046	0.876636	0.845178	1.04086	0.957765	0.867714	1.07651	0.98009	1.08009	0.998024	0.913899	1.21602	0.930854	1.03102	1.02599	0.990127	0.0224067	17
262.5	0.986436	1.053	0.959321	0.881568	0.832585	1.05361	0.95775	0.853274	1.07198	1.03751	1.07947	1.00592	0.93695	1.23033	0.93555	1.01318	1.02819	0.995096	0.0232924	17
265	0.961895	1.054	0.962597	0.872701	0.842277	1.06791	0.975415	0.870371	1.08535	1.02932	1.06958	0.996977	0.946186	1.19647	0.930911	1.01459	1.03128	0.994578	0.0217627	17
267.5	0.989418	1.05501	0.965872	0.876232	0.83731	1.06104	0.958776	0.866295	1.09273	1.00128	1.08628	0.963351	0.925306	1.19383	0.931403	1.00913	1.03163	0.990875	0.0222205	17
270	0.992401	1.05601	0.969148	0.880477	0.835582	1.06219	0.976879	0.864542	1.07947	1.01919	1.102	0.99441	0.92783	1.17515	0.939024	1.02939	1.03155	0.996191	0.0215702	17
272.5	0.995383	1.05702	0.972423	0.869271	0.823234	1.07033	0.961362	0.853242	1.07273	0.981781	1.10856	0.996256	0.949278	1.19267	0.931382	1.01757	1.02002	0.9925	0.0228424	17
275	0.998366	1.05802	0.975699	0.868594	0.805412	1.05804	0.959976	0.848745	1.07783	1.0169	1.09452	1.01899	0.981161	1.18849	0.919184	1.01887	1.01385	0.994274	0.0230874	17
277.5	1.00135	1.05903	0.978974	0.873926	0.788833	1.06899	0.946051	0.864599	1.10462	0.958583	1.1054	0.985383	0.949967	1.17539	0.946166	1.02699	1.01603	0.991193	0.0235016	17
280	1.00433	1.06003	0.98225	0.867937	0.796272	1.06456	0.949823	0.85873	1.10059	0.980854	1.0794	0.983166	0.95373	1.20174	0.937268	1.02781	1.01625	0.992043	0.0237428	17
282.5	1.00731	1.06103	0.985525	0.866229	0.781189	1.07258	0.947086	0.853919	1.08961	0.956827	1.09395	0.982125	0.947377	1.18049	0.912509	1.04244	0.99839	0.986976	0.0242632	17
285	1.0103	1.06204	0.988801	0.862213	0.776523	1.09869	0.934393	0.858716	1.09923	0.954222	1.09825	0.981371	0.968009	1.2164	0.947508	1.02919	1.01581	0.994215	0.0257315	17
287.5	1.01328	1.06304	0.992076	0.867704	0.776342	1.09569	0.935308	0.856546	1.09641	0.942984	1.09143	0.985197	0.969047	1.16221	0.915872	1.02786	1.00625	0.988073	0.0242178	17
290	1.01626	1.06405	0.995352	0.862938	0.772424	1.0991	0.937748	0.861879	1.09529	0.933639	1.08024	1.00162	0.958296	1.19603	0.919399	1.02898	1.00315	0.989788	0.0252491	17
292.5	1.01924	1.06505	0.998627	0.866781	0.762525	1.08738	0.935208	0.8717	1.10787	0.957482	1.05349	0.960194	0.937628	1.14984	0.955916	1.05022	0.989073	0.986366	0.0236935	17
295	1.02222	1.06606	1.0019	0.858531	0.754092	1.09316	0.94839	0.873449	1.08849	0.959226	1.10735	0.966909	0.940942	1.17719	0.942471	1.0437	0.990122	0.990248	0.0252488	17
297.5	1.02521	1.06706	1.00518	0.86573	0.764156	1.09287	0.951042	0.852633	1.08412	0.954698	1.08977	0.972701	0.969927	1.16065	0.953928	1.03808	0.996756	0.990854	0.0241287	17
300	1.02819	1.06807	1.00845	0.855372	0.765649	1.09072	0.954726	0.850431	1.09028	0.946132	1.07288	0.987553	0.938268	1.16998	0.913096	1.04129	0.99691	0.986941	0.0249689	17
302.5	1.03117	1.06907	1.01173	0.855557	0.761872	1.09531	0.966242	0.859772	1.08142	0.942544	1.11026	0.996352	0.931049	1.1969	0.934633	1.03567	1.00309	0.993097	0.0259883	17
305	1.03415	1.07008	1.015	0.844323	0.780075	1.09986	0.9707	0.878928	1.10041	0.925484	1.11325	0.954085	0.945773	1.17886	0.931642	1.06024	1.01761	0.995322	0.025591	17
307.5	1.03714	1.07108	1.01828	0.84052	0.783079	1.08403	0.954178	0.868408	1.07111	0.92861	1.09922	0.939597	0.97512	1.16557	0.920005	1.03438	1.00337	0.987865	0.0244423	17
310	1.04012	1.07209	1.02156	0.848526	0.797769	1.08478	0.972306	0.87735	1.07347	0.923456	1.1076	0.954215	0.96111	1.15947	0.913791	1.05481	1.00581	0.992249	0.023905	17
312.5	1.0431	1.07309	1.02483	0.841543	0.783826	1.08012	0.981104	0.880906	1.07662	0.926514	1.08465	0.96065	0.993545	1.1989	0.921521	1.05883	0.985665	0.995025	0.0249712	17
315	1.04608	1.0741	1.02811	0.819831	0.768423	1.07249	0.980876	0.872882	1.08235	0.942435	1.09111	0.940083	0.95121	1.14538	0.914061	1.04397	1.00084	0.986719	0.0248595	17
