# Supplementary material for: Optimized Vivid-derived Magnets photodimerizers for subcellular optogenetics in mammalian cells
Source: eLife. 2020 Nov 11;9:e63230. doi: 10.7554/eLife.63230 (PMC7735757; doi:10.7554/eLife.63230)
Supplement: Figure 4—source data 1. [file elife-63230-fig4-data1.xlsx]

## Sheet: Wt + MSP
PI4P Removal from Golgi
HeLa Wt + MSP domain
Experiments:
200214_Optogenetics
190912_OptoVAPB_Mito
190905_OptoVAPB+ITZ
190801_Opto_MSPVAPBrecruitment
See Material and Methods for detals on analysis
Measure: (FROI-FBkg)/(FWholeCell-FBkg) Normalized for F measured at t1
Time	Cell1	Cell2	Cell3	Cell4	Cell5	Cell6	Cell7	Cell8	Cell9	Cell10	Cell11	Cell12	Cell13	Cell14	Cell15	Cell16	Cell17	Cell18	Cell19	Cell20	Cell21	Cell22	Cell23	Cell24	Average	ES	N
0	1	1	1	1	1	1	1	1	1	1	1	1	1	1	1	1	1	1	1	1	1	1	1	1	1	0	24
2.5	1.01244	0.981577	0.982635	0.957385	1.00696	0.998375	0.99603	0.983537	1.01714	1.00837	1.00404	0.98469	1.01061	1.00617	0.996895	0.992753	1.01218	0.980948	1.02548	1.01607	1.02346	1.0028	1.01021	0.96801	0.999116	0.00352611	24
5	1.00452	0.970464	1.00589	0.985774	1.01682	0.991393	1.00394	1.01138	1.02523	0.965836	0.995565	1.01209	1.00899	1.00955	0.995068	0.991452	1.01881	0.97566	1.01038	1.01457	1.05627	0.987943	0.994813	0.933384	0.999409	0.00483526	24
7.5	1.00379	0.971769	1.00605	0.966214	1.00677	0.994444	1.02044	1.01894	1.01024	0.952964	0.990446	1.01223	1.013	1.00721	1.00081	0.990354	1.01017	0.979213	0.984346	1.00421	0.984532	0.986565	1.0062	0.956074	0.994874	0.00387089	24
10	1.00145	0.960245	1.02492	0.949056	1.03621	0.978585	1.02279	0.99537	1.00476	0.947925	0.975403	1.01664	1.00103	1.01692	0.992411	0.9987	1.03123	1.01255	1.05051	1.01517	0.959856	0.991002	0.975851	0.967542	0.996922	0.00572438	24
12.5	1.00646	0.952237	1.02719	0.962533	1.0312	0.978064	1.02894	1.01482	1.00867	0.967223	0.999759	1.03132	0.994619	1.01588	0.995236	1.00287	1.02772	0.996685	1.04415	1.03322	1.0473	0.981726	0.987557	0.931264	1.00278	0.0060968	24
15	1.00514	0.961604	1.03855	0.943528	1.01947	0.992495	1.03036	1.03626	1.01494	0.982911	1.01728	1.02849	0.998108	1.0266	0.990613	1.01123	1.02616	0.999022	1.00518	1.01487	1.04027	0.955701	0.983859	0.945009	1.00282	0.00586841	24
17.5	0.995486	0.988443	1.02776	0.983266	1.02717	1.01482	1.00499	1.02911	1.01061	0.946421	1.0135	1.03659	1.0069	1.01248	0.987875	1.03149	1.03307	1.00136	1.02548	1.01607	1.02346	1.0028	1.01021	0.94388	1.00722	0.00493543	24
20	0.993183	0.970811	1.03645	0.954131	1.03418	0.990172	1.02859	1.02808	1.03931	0.968391	0.989321	1.02661	1.00512	1.01446	0.986293	1.02788	1.03658	1.0037	1.01038	1.01457	1.05627	0.987943	0.994813	0.976344	1.00723	0.00539796	24
22.5	1.00082	0.958974	1.02968	0.991056	1.02652	1.00202	0.988668	1.01739	1.03413	0.940065	0.976108	1.02667	1.02061	1.02289	0.993714	1.00594	1.03738	1.00603	0.984346	1.00421	0.984532	0.986565	1.0062	0.955101	0.999984	0.00521567	24
25	0.998968	0.973701	1.01838	0.956167	1.0257	1.0154	0.976799	1.01663	1.01726	0.949156	0.971275	1.019	1.01963	1.03668	0.991844	1.01862	1.04625	1.00837	1.05051	1.01517	0.959856	0.991002	0.975851	0.960421	1.00053	0.00597455	24
27.5	1.00585	0.976264	1.04264	0.95637	1.02848	0.997098	0.98802	1.0409	1.04259	0.952026	0.954054	1.0335	1.05252	1.07404	0.986982	1.02216	1.03959	1.01071	1.04415	1.03322	1.0473	0.981726	0.987557	0.963576	1.01089	0.00726645	24
30	0.993759	0.954433	1.04918	0.993216	1.03564	1.00224	0.985711	1.0107	1.01599	0.92473	0.955445	1.03122	1.04406	1.05109	0.984418	1.01981	1.0539	1.01304	1.00518	1.01487	1.04027	0.955701	0.983859	0.968162	1.00361	0.00713627	24
32.5	0.99691	0.97137	1.0434	0.984775	1.01158	1.00372	0.976734	0.993103	1.04272	0.934413	0.956565	1.01647	1.04355	1.05402	0.982353	1.02209	1.03862	1.01538	0.984346	1.01607	0.984532	0.986565	1.0062	0.946596	1.0005	0.00647113	24
35	0.990405	0.942639	1.04216	0.967493	1.02146	1.0175	1.01454	1.00965	1.05104	0.985959	0.950849	1.02039	1.03207	1.05447	0.985216	1.01558	1.03816	1.01772	1.05051	1.01457	0.959856	0.991002	0.975851	0.935216	1.00351	0.0071334	24
37.5	0.985893	0.959936	1.03316	0.992891	1.01715	1.01827	1.00306	1.03068	1.03694	0.942317	0.953732	1.01692	1.05106	1.03888	0.986212	1.02645	1.03716	1.02005	1.04415	1.00421	1.0473	0.981726	0.987557	0.897279	1.00471	0.00775026	24
40	1.00315	0.939904	1.02752	0.995611	1.0453	1.00863	0.984952	1.03482	1.08192	0.918801	0.961609	1.02534	1.01129	1.04902	0.989148	1.01594	1.01929	1.02239	1.00518	1.01517	1.04027	0.955701	0.983859	0.874486	1.00039	0.00922838	24
42.5	1.00981	0.943408	1.05216	0.982026	1.04445	1.01175	0.972279	1.03626	1.10605	0.911366	0.944831	1.02146	0.965877	1.02756	0.971755	1.01379	1.01365	0.975308	0.953323	1.00242	1.06529	0.952301	0.967648	0.854023	0.991616	0.0109548	24
45	0.982445	0.923363	1.04979	0.983506	1.02491	0.995994	0.930564	1.01071	1.06705	0.858623	0.957151	1.00963	0.973689	1.0123	0.971633	1.0005	0.999532	0.927828	0.972376	0.993616	1.03419	0.920018	0.992278	0.851507	0.9768	0.0108795	24
47.5	0.949739	0.920352	1.03027	1.00764	0.978866	0.960256	0.872866	1.00848	1.01565	0.825612	0.941198	1.00059	0.972105	1.00092	0.957039	0.973579	0.984904	0.872059	0.883568	0.914547	0.975249	0.878293	0.97434	0.81563	0.946406	0.0123461	24
50	0.9212	0.90577	0.981321	0.971535	0.957327	0.928191	0.84597	1.00356	0.988019	0.796468	0.925442	1.00045	0.942031	0.984539	0.936179	0.947482	0.937807	0.819881	0.851501	0.871776	0.925984	0.810397	0.923063	0.735104	0.912958	0.0144345	24
52.5	0.880592	0.856706	0.952434	0.981379	0.908172	0.901059	0.817813	0.987827	0.964421	0.742503	0.894969	0.97315	0.933027	0.949395	0.916818	0.926816	0.911137	0.754787	0.820955	0.802223	0.898171	0.752273	0.896315	0.693883	0.879868	0.0168454	24
55	0.849362	0.834663	0.913396	0.970223	0.889627	0.877475	0.787892	0.963663	0.903894	0.752279	0.858895	0.952655	0.910138	0.919706	0.89703	0.897962	0.8719	0.700243	0.765817	0.731904	0.794763	0.69712	0.872103	0.640763	0.843895	0.0184355	24
57.5	0.81545	0.794261	0.895087	0.943051	0.853814	0.859519	0.764322	0.956108	0.899343	0.720294	0.841226	0.929505	0.8795	0.898386	0.878308	0.875177	0.831965	0.641789	0.746688	0.684888	0.761695	0.646562	0.863198	0.588175	0.815346	0.02062	24
60	0.777798	0.768042	0.869324	0.941495	0.846285	0.830981	0.76379	0.942486	0.875046	0.709032	0.820317	0.898699	0.859131	0.87252	0.863415	0.851312	0.804509	0.601861	0.75289	0.611601	0.743743	0.586372	0.796838	0.545164	0.78886	0.0224535	24
62.5	0.747607	0.759168	0.864675	0.959548	0.833728	0.814955	0.781765	0.931994	0.852219	0.733553	0.806374	0.874717	0.843969	0.860587	0.849986	0.832726	0.769088	0.59915	0.718243	0.569146	0.728564	0.547046	0.788512	0.499394	0.773613	0.0240491	24
65	0.705641	0.73863	0.861385	0.947489	0.825933	0.813106	0.749889	0.942229	0.868171	0.723962	0.79448	0.847018	0.822402	0.837104	0.847642	0.811873	0.747367	0.603216	0.663466	0.513202	0.700563	0.507745	0.744684	0.46571	0.753455	0.0262112	24
67.5	0.685321	0.720435	0.861274	0.920028	0.821185	0.793718	0.757791	0.943784	0.857033	0.717537	0.772633	0.820221	0.793554	0.799976	0.829627	0.807086	0.718006	0.569446	0.697806	0.484156	0.734451	0.488094	0.712748	0.442675	0.739524	0.0266468	24
70	0.668537	0.709271	0.848035	0.8984	0.819038	0.793113	0.781387	0.926629	0.838614	0.697709	0.749832	0.800207	0.79053	0.786345	0.821116	0.792702	0.69775	0.55869	0.659826	0.455263	0.660533	0.462041	0.680531	0.425269	0.721724	0.0275191	24
72.5	0.642428	0.695109	0.85601	0.909121	0.818706	0.774061	0.7905	0.919693	0.825703	0.716608	0.742771	0.76811	0.778259	0.759941	0.820782	0.785209	0.679123	0.546999	0.660675	0.442757	0.680844	0.444397	0.656393	0.419667	0.713911	0.0280612	24
75	0.63285	0.682975	0.867879	0.898372	0.817215	0.779305	0.77666	0.936061	0.822403	0.715476	0.724349	0.743142	0.754384	0.746122	0.811377	0.782162	0.670236	0.540339	0.627928	0.433432	0.61131	0.434798	0.638229	0.40481	0.702159	0.0291034	24
77.5	0.612514	0.683763	0.842237	0.890268	0.815371	0.775804	0.807804	0.951006	0.807138	0.708756	0.712548	0.7334	0.741962	0.733131	0.804085	0.782981	0.655291	0.529771	0.66286	0.432012	0.645164	0.421324	0.609627	0.401134	0.698331	0.0292943	24
80	0.614231	0.680178	0.857843	0.891998	0.805787	0.767517	0.791237	0.939953	0.832215	0.710853	0.701908	0.705672	0.742194	0.730494	0.801643	0.775903	0.656133	0.55112	0.646931	0.413764	0.608461	0.41474	0.583336	0.406294	0.692934	0.0296379	24
82.5	0.609532	0.679399	0.865025	0.918716	0.81761	0.768216	0.779225	0.920795	0.807988	0.73901	0.676003	0.702353	0.746614	0.724155	0.800047	0.776203	0.638557	0.525298	0.652412	0.41337	0.630165	0.413314	0.573476	0.411024	0.691188	0.0298839	24
85	0.604705	0.677192	0.859574	0.888464	0.832384	0.766659	0.787318	0.942088	0.800608	0.749903	0.666835	0.695204	0.727668	0.706735	0.801657	0.7731	0.63956	0.527648	0.639632	0.412888	0.607518	0.397043	0.564214	0.412121	0.686697	0.0302718	24
87.5	0.600922	0.664405	0.849295	0.910943	0.81945	0.774209	0.797381	0.930049	0.794172	0.775002	0.674768	0.681155	0.718658	0.699266	0.796279	0.764561	0.628798	0.515294	0.633768	0.401195	0.648981	0.399429	0.558046	0.406634	0.685111	0.0305748	24
90	0.593758	0.668072	0.863535	0.911069	0.818042	0.763207	0.819327	0.93616	0.771868	0.783008	0.645697	0.677501	0.723237	0.695645	0.799872	0.758633	0.623895	0.528817	0.631933	0.411246	0.667019	0.399474	0.562844	0.411255	0.686046	0.0304865	24
92.5	0.595501	0.671927	0.864158	0.87395	0.810855	0.759082	0.810982	0.94348	0.780784	0.794245	0.631751	0.658977	0.71147	0.691607	0.803185	0.759077	0.618167	0.518551	0.629835	0.394925	0.677127	0.396258	0.543906	0.415044	0.681452	0.0306951	24
95	0.588262	0.662587	0.864863	0.871464	0.819588	0.783038	0.832775	0.938492	0.772345	0.78719	0.631397	0.665218	0.712423	0.709234	0.802443	0.759438	0.617592	0.53158	0.64824	0.401769	0.680911	0.392213	0.543102	0.411925	0.684504	0.0307781	24
97.5	0.591765	0.667389	0.887205	0.899565	0.813067	0.774985	0.788565	0.941374	0.762377	0.769562	0.630203	0.657808	0.707489	0.714545	0.808639	0.752335	0.616759	0.550733	0.624504	0.398886	0.631201	0.391341	0.486431	0.553935	0.684194	0.0297601	24
100	0.597089	0.670067	0.893604	0.889235	0.822015	0.797126	0.792183	0.950196	0.77684	0.805792	0.641516	0.656269	0.692	0.71511	0.812872	0.756415	0.627558	0.524799	0.638313	0.400285	0.680483	0.391059	0.481791	0.576609	0.691218	0.0302536	24
102.5	0.589544	0.669491	0.890238	0.910584	0.830502	0.791323	0.817054	0.976344	0.779226	0.784035	0.658	0.670132	0.690956	0.709921	0.812045	0.767165	0.631552	0.501417	0.609783	0.396343	0.710876	0.391468	0.491261	0.594707	0.694749	0.0311646	24
105	0.604542	0.678011	0.909249	0.892262	0.822961	0.796772	0.831518	0.960381	0.787013	0.786842	0.666413	0.647347	0.69152	0.713444	0.815963	0.762677	0.641747	0.520756	0.629945	0.396404	0.632341	0.393467	0.491509	0.617104	0.695424	0.0306199	24
107.5	0.598399	0.667721	0.897645	0.904167	0.833218	0.800719	0.842616	0.961705	0.76976	0.809095	0.669024	0.648884	0.696947	0.716003	0.816345	0.765125	0.640181	0.509942	0.601711	0.406848	0.70926	0.399494	0.495291	0.617943	0.699085	0.0307375	24
110	0.610814	0.673359	0.901229	0.934605	0.850188	0.796494	0.852406	0.969342	0.772071	0.840379	0.677045	0.653552	0.699049	0.721506	0.821339	0.775559	0.64626	0.523869	0.616269	0.401712	0.674103	0.392916	0.493349	0.656353	0.706407	0.0315313	24
112.5	0.614973	0.683837	0.901684	0.877667	0.845828	0.81642	0.879894	0.979212	0.769882	0.851351	0.711972	0.650114	0.709305	0.726745	0.82546	0.774513	0.65939	0.497264	0.598875	0.409771	0.699041	0.400109	0.502986	0.690362	0.711527	0.0312845	24
115	0.619123	0.68601	0.882106	0.904706	0.859841	0.800697	0.861781	0.961785	0.782221	0.828052	0.716179	0.655333	0.677351	0.722116	0.827683	0.781402	0.668308	0.523041	0.64638	0.408841	0.66571	0.396495	0.514895	0.692305	0.711765	0.0302706	24
117.5	0.62148	0.692275	0.907184	0.909752	0.844121	0.807744	0.893262	0.976544	0.774607	0.834328	0.709648	0.658413	0.682917	0.7324	0.828328	0.797247	0.660185	0.493503	0.647804	0.420595	0.732288	0.404263	0.516011	0.720215	0.71938	0.0310101	24
120	0.634056	0.676908	0.929686	0.880391	0.863366	0.814188	0.896765	1.00306	0.758414	0.852749	0.720517	0.657366	0.689736	0.727058	0.831473	0.798242	0.676967	0.529101	0.646042	0.420223	0.739436	0.404687	0.507913	0.724039	0.724266	0.0312845	24
122.5	0.632887	0.68078	0.927568	0.927914	0.865836	0.824749	0.917341	0.985408	0.772438	0.849955	0.722082	0.665693	0.697699	0.727061	0.834051	0.804127	0.687639	0.510902	0.624511	0.427066	0.701468	0.408392	0.521642	0.741512	0.727447	0.0317345	24
125	0.637446	0.674346	0.910861	0.952692	0.870972	0.822939	0.891103	1.01726	0.814541	0.851592	0.731181	0.663923	0.702457	0.72717	0.844496	0.812653	0.697387	0.522274	0.6294	0.441125	0.768055	0.406681	0.53395	0.748205	0.736363	0.0318374	24
127.5	0.647139	0.690152	0.934391	0.924838	0.870671	0.821129	0.925875	1.02077	0.810351	0.864927	0.742629	0.660853	0.698975	0.73252	0.844218	0.820569	0.704958	0.536331	0.624739	0.44673	0.756014	0.411196	0.542521	0.76026	0.741365	0.0317301	24
130	0.655871	0.688773	0.925369	0.931638	0.865994	0.82734	0.936222	0.983733	0.806309	0.854681	0.745856	0.672077	0.707062	0.72545	0.849849	0.831099	0.699857	0.548918	0.633246	0.448229	0.788021	0.420878	0.541259	0.796548	0.745178	0.0308956	24
132.5	0.654775	0.692706	0.948582	0.930741	0.89777	0.824388	0.887177	1.01962	0.7884	0.866268	0.74717	0.673266	0.706687	0.715176	0.860491	0.834242	0.710657	0.560811	0.628444	0.44758	0.761495	0.429566	0.552163	0.789145	0.746972	0.031087	24
135	0.668225	0.69747	0.936579	0.916344	0.886596	0.832264	0.907732	1.00906	0.822322	0.896173	0.75611	0.689344	0.713933	0.724364	0.8624	0.839788	0.724414	0.560936	0.631825	0.459108	0.863033	0.42986	0.572173	0.809279	0.758722	0.0308653	24
137.5	0.663815	0.70493	0.947233	0.94074	0.895347	0.832601	0.941435	0.995857	0.821111	0.907782	0.754278	0.70356	0.72377	0.721522	0.867053	0.842547	0.728647	0.572296	0.644208	0.465534	0.775734	0.437785	0.5735	0.823088	0.761849	0.0307246	24
140	0.673394	0.715643	0.940862	0.931642	0.872027	0.84941	0.913566	1.01649	0.831563	0.852827	0.761034	0.704236	0.740228	0.714599	0.870873	0.850275	0.724443	0.567593	0.653516	0.469246	0.795915	0.452468	0.574572	0.819386	0.762325	0.0297668	24
142.5	0.674236	0.722624	0.966612	0.936009	0.901837	0.850952	0.87253	0.999701	0.843274	0.886512	0.775037	0.707539	0.731953	0.707018	0.885267	0.854598	0.743293	0.57396	0.659128	0.482299	0.826713	0.454353	0.584029	0.85474	0.770592	0.0298664	24
145	0.694409	0.724217	0.958992	0.933019	0.90718	0.848813	0.883849	1.03253	0.842195	0.875247	0.77614	0.718673	0.751251	0.722092	0.885605	0.863038	0.746771	0.584181	0.65972	0.482043	0.83288	0.460595	0.592914	0.825859	0.775092	0.0296214	24
147.5	0.69853	0.732396	0.951722	0.912937	0.895806	0.847043	0.902678	1.04002	0.867792	0.874285	0.776637	0.742383	0.742309	0.708216	0.888514	0.868356	0.741569	0.614469	0.706201	0.49022	0.832871	0.462598	0.606024	0.837482	0.780878	0.028748	24
150	0.708978	0.73213	0.954342	0.937838	0.906716	0.846034	0.894675	1.039	0.887581	0.841548	0.783559	0.719157	0.753909	0.725159	0.896365	0.871874	0.750993	0.626987	0.692248	0.505037	0.835946	0.48308	0.636315	0.836326	0.786075	0.0279045	24
152.5	0.704506	0.73899	0.963153	0.928515	0.908616	0.850588	0.900728	1.03232	0.895362	0.870839	0.787899	0.720585	0.737304	0.719559	0.897767	0.882881	0.751459	0.635043	0.714742	0.50465	0.844652	0.486957	0.65642	0.838177	0.790488	0.0277738	24
155	0.714376	0.740614	0.966832	0.945954	0.923355	0.842823	0.927529	1.03255	0.906752	0.887237	0.789642	0.719448	0.73802	0.723299	0.904922	0.89327	0.754989	0.640048	0.701812	0.514394	0.848829	0.488944	0.650089	0.863374	0.796629	0.028444	24
157.5	0.715488	0.745262	0.97254	0.969355	0.92116	0.864905	0.889416	1.05939	0.940631	0.860746	0.798242	0.714826	0.737893	0.730232	0.913645	0.882742	0.750088	0.626163	0.752403	0.536899	0.845202	0.49706	0.660955	0.85519	0.801685	0.0283065	24
160	0.72527	0.7452	0.95663	0.983553	0.934155	0.854203	0.918132	1.03717	0.946195	0.917851	0.796161	0.713073	0.742194	0.721694	0.914262	0.882563	0.741567	0.660501	0.750083	0.536806	0.873336	0.516477	0.671764	0.850027	0.807869	0.0278451	24
162.5	0.731883	0.747482	0.940881	0.96718	0.92011	0.868049	0.924008	0.998513	0.935918	0.865954	0.813789	0.715917	0.754414	0.745179	0.923649	0.88734	0.75327	0.69897	0.761623	0.544096	0.826395	0.515694	0.679017	0.848272	0.806983	0.0256719	24
165	0.746493	0.767719	0.947308	0.983875	0.942241	0.874643	0.948693	1.02571	0.966851	0.873299	0.804088	0.71724	0.742368	0.746035	0.930159	0.885265	0.738871	0.727112	0.736454	0.555038	0.923853	0.522382	0.681664	0.870609	0.819082	0.0270718	24
167.5	0.745632	0.746989	0.951199	1.00069	0.946002	0.874761	0.897272	1.04029	0.975984	0.846105	0.818238	0.711562	0.742056	0.749956	0.928067	0.896836	0.747424	0.722158	0.769724	0.550287	0.862857	0.527618	0.682668	0.851064	0.81606	0.0267952	24
170	0.757398	0.765466	0.93167	0.99099	0.929373	0.860732	0.913204	1.03362	0.980724	0.853637	0.820427	0.712184	0.767224	0.764397	0.938861	0.900137	0.727754	0.727007	0.783924	0.566482	0.961651	0.531777	0.704521	0.875596	0.824948	0.02635	24
172.5	0.760469	0.77634	0.937892	0.998042	0.939277	0.868206	0.891556	1.00928	0.995619	0.828808	0.821624	0.709307	0.759849	0.76251	0.944786	0.900594	0.727475	0.715823	0.780562	0.565215	0.887966	0.538042	0.718003	0.882219	0.821644	0.0257118	24
175	0.765163	0.761109	0.968763	0.991709	0.929803	0.872356	0.9059	1.05325	0.98201	0.843599	0.824249	0.711247	0.773345	0.770504	0.958239	0.907493	0.734535	0.744544	0.795499	0.569583	0.936017	0.547544	0.728658	0.855251	0.830432	0.0260882	24
177.5	0.758336	0.766581	0.961842	0.967576	0.918237	0.873621	0.860797	1.03214	0.992709	0.878252	0.839774	0.712297	0.759859	0.7856	0.959756	0.90361	0.723836	0.806163	0.790447	0.579706	0.910942	0.553639	0.747411	0.872246	0.831474	0.0246862	24
180	0.78039	0.767301	0.978433	0.988648	0.940652	0.881139	0.853118	1.05586	1.00951	0.860495	0.830108	0.687451	0.764063	0.789863	0.969716	0.904598	0.715132	0.765637	0.844731	0.583564	0.905272	0.569833	0.761949	0.889176	0.83736	0.0256435	24
182.5	0.784475	0.767142	0.9674	1.00206	0.93203	0.884371	0.913893	1.04832	1.01517	0.857228	0.84353	0.682866	0.762233	0.805018	0.970902	0.902767	0.71476	0.801482	0.81672	0.579669	0.921468	0.570796	0.782398	0.908367	0.843128	0.0257693	24
185	0.804574	0.771186	0.998729	1.01956	0.92164	0.879014	0.879409	1.0464	1.03438	0.863463	0.834715	0.669366	0.761071	0.819911	0.974614	0.905368	0.724143	0.828108	0.805598	0.596041	0.957285	0.575276	0.789711	0.910364	0.848747	0.0260996	24
187.5	0.812839	0.769737	1.01973	0.995918	0.934716	0.8904	0.900256	1.02561	1.03385	0.90253	0.832707	0.663234	0.769642	0.810232	0.985715	0.905356	0.706784	0.825404	0.838368	0.588158	0.916497	0.577411	0.789743	0.934382	0.851218	0.0262587	24
190	0.81159	0.760328	0.987865	0.990676	0.941518	0.884025	0.860983	1.02997	1.03465	0.87171	0.827755	0.661023	0.766215	0.823951	0.997242	0.899845	0.722481	0.85967	0.834229	0.594223	0.947025	0.580132	0.797591	0.93035	0.850627	0.0257655	24
192.5	0.821683	0.761649	0.996766	0.985938	0.945433	0.879232	0.88667	1.05466	1.04606	0.84645	0.839786	0.662119	0.771982	0.851461	0.995798	0.90457	0.724505	0.835956	0.873377	0.589191	0.882991	0.582853	0.808424	0.955764	0.854305	0.0260795	24
195	0.834302	0.764103	0.998237	1.01582	0.955829	0.912336	0.890468	1.0444	1.02985	0.854332	0.841922	0.667671	0.77373	0.860708	1.00257	0.90778	0.735873	0.878984	0.864506	0.592855	0.920231	0.585575	0.817656	0.95546	0.862717	0.0260007	24
197.5	0.848087	0.775131	0.990624	0.999011	0.941083	0.901286	0.886806	1.03577	1.01115	0.869243	0.841935	0.67379	0.772037	0.865762	1.00732	0.919241	0.723816	0.904597	0.860686	0.603889	0.8847	0.588296	0.809124	0.940494	0.860578	0.0249696	24
200	0.850501	0.775043	1.0137	0.998954	0.938774	0.919134	0.931753	1.05161	1.04524	0.875723	0.847131	0.668203	0.768708	0.890636	1.01556	0.915613	0.732846	0.911023	0.880087	0.600354	0.884419	0.591017	0.82238	0.939031	0.869477	0.0260617	24
202.5	0.858184	0.782112	1.01648	1.00486	0.933635	0.913587	0.935249	1.04443	1.04066	0.879587	0.837431	0.671851	0.774341	0.895129	1.02246	0.919582	0.739747	0.910795	0.864614	0.601787	0.828803	0.593739	0.819681	0.945121	0.868078	0.0258853	24
205	0.877016	0.782928	1.04355	1.00815	0.925117	0.90826	0.898921	1.05188	1.06256	0.849468	0.826032	0.670314	0.774807	0.901562	1.02617	0.919841	0.726809	0.888122	0.864891	0.59373	0.865183	0.59646	0.822921	0.950438	0.868131	0.026653	24
207.5	0.868101	0.791911	1.01835	0.987453	0.93989	0.902271	0.873717	1.04407	1.04093	0.849875	0.833754	0.675228	0.767387	0.916302	1.02784	0.92609	0.719085	0.924832	0.932944	0.60565	0.874527	0.599182	0.829476	0.956864	0.871072	0.0258864	24
210	0.897482	0.793753	1.01102	1.00564	0.934542	0.91397	0.87846	1.03361	1.03456	0.894848	0.843705	0.681302	0.787027	0.924512	1.0292	0.926278	0.726687	0.878707	0.903082	0.610446	0.904451	0.601903	0.831161	0.981274	0.876151	0.0253697	24
212.5	0.906796	0.801805	1.06035	0.984933	0.942056	0.925463	0.864518	1.03973	1.04342	0.896328	0.849567	0.685009	0.797952	0.939025	1.03585	0.932072	0.723478	0.888024	0.948195	0.60831	0.871635	0.604624	0.835114	0.987949	0.882175	0.0261567	24
215	0.901828	0.795348	1.03312	0.987773	0.941486	0.915242	0.887553	1.01816	1.03091	0.890782	0.845396	0.703529	0.799232	0.918383	1.03174	0.929462	0.720353	0.95412	0.920783	0.612542	0.880131	0.607346	0.834135	0.963227	0.880107	0.0249316	24
217.5	0.925515	0.802737	1.02449	0.999114	0.94729	0.931227	0.912135	1.0482	1.05094	0.879647	0.853786	0.708155	0.811571	0.940396	1.03677	0.931729	0.730578	0.924744	0.924483	0.613013	0.831963	0.610067	0.833702	0.994573	0.886118	0.0255992	24
220	0.924221	0.817832	1.04314	0.97102	0.946644	0.931524	0.881356	1.04687	1.03071	0.886032	0.857352	0.7138	0.81924	0.93837	1.0411	0.932675	0.726	0.923328	0.926567	0.626972	0.826217	0.612788	0.861381	1.01956	0.887696	0.0250672	24
222.5	0.921157	0.819758	1.06726	0.994858	0.948345	0.931296	0.921318	1.05454	1.03533	0.94251	0.859183	0.71713	0.819642	0.948474	1.04387	0.936678	0.736791	0.902692	0.936327	0.622873	0.882167	0.61551	0.828053	1.04122	0.896957	0.0258376	24
225	0.93143	0.816294	1.04682	0.974646	0.955712	0.932484	0.907927	1.05623	1.03851	0.890326	0.866972	0.731499	0.819955	0.946502	1.04518	0.934372	0.730297	0.881608	0.96849	0.631845	0.886028	0.618231	0.831505	1.02392	0.89445	0.0251076	24
227.5	0.942181	0.83199	1.07874	0.960415	0.93652	0.931197	0.945768	1.05902	1.02984	0.900591	0.862982	0.735643	0.827341	0.973588	1.04705	0.940627	0.722979	0.855776	0.906803	0.602324	0.911275	0.620952	0.835543	1.03898	0.895755	0.0260254	24
230	0.945788	0.832944	1.072	1.00964	0.937999	0.934822	0.93186	1.05746	1.03627	0.930687	0.852818	0.741116	0.825744	0.999854	1.04716	0.936796	0.72723	0.852504	0.923127	0.618029	0.870982	0.623674	0.848535	1.04237	0.899975	0.0260434	24
232.5	0.967713	0.852475	1.07289	0.975797	0.950083	0.94219	0.935419	1.08502	1.04778	0.934583	0.861509	0.74447	0.835798	0.977537	1.05817	0.937275	0.7282	0.855484	0.959879	0.613195	0.868916	0.626395	0.83211	1.04747	0.904598	0.0264615	24
235	0.947489	0.839236	1.0737	0.98677	0.951023	0.951181	0.940751	1.07063	1.01914	0.944768	0.873899	0.754221	0.834861	0.996125	1.05988	0.934527	0.723823	0.913594	0.970778	0.624587	0.9415	0.629116	0.825511	1.05525	0.910931	0.0259591	24
237.5	0.956401	0.846358	1.06777	0.972573	0.96917	0.959746	0.955965	1.05097	1.00967	0.948409	0.874419	0.760314	0.84759	0.991555	1.06321	0.943191	0.726576	0.93343	0.934743	0.630421	0.860198	0.631838	0.828977	1.00375	0.906969	0.0248595	24
240	0.953253	0.86635	1.09206	0.99392	0.962425	0.968247	0.984179	1.0506	1.00545	0.963597	0.88894	0.762827	0.860413	0.997433	1.0698	0.931377	0.739899	0.978993	0.947428	0.619167	0.865141	0.634559	0.859426	1.02634	0.917576	0.0254608	24
242.5	0.965097	0.860427	1.07114	0.986972	0.938306	0.952421	0.973916	1.057	1.00848	0.93506	0.898122	0.760919	0.87061	1.00188	1.06966	0.936962	0.72579	0.980022	0.963828	0.622765	0.892135	0.637281	0.847194	1.04324	0.916634	0.0253296	24
245	0.959605	0.852667	1.07652	0.983882	0.975598	0.952167	0.972239	1.04027	0.997306	0.939104	0.906312	0.775438	0.883356	0.997885	1.0747	0.933748	0.723639	0.944121	0.941416	0.636393	0.886469	0.640002	0.820525	1.06044	0.915575	0.0249514	24
247.5	0.943342	0.858238	1.0841	1.00405	0.961279	0.959614	0.991028	1.05575	0.998469	0.969142	0.901474	0.773754	0.872931	1.01954	1.0776	0.94323	0.733871	0.962513	0.93066	0.634251	0.924368	0.642723	0.812316	1.06051	0.921448	0.0255132	24
250	0.95262	0.86249	1.08187	0.977363	0.97763	0.953653	0.958112	1.05911	0.997424	0.98172	0.905751	0.773325	0.896129	1.00552	1.08773	0.942062	0.728609	0.947865	0.945943	0.642622	0.933224	0.645445	0.831161	1.0221	0.921228	0.0246717	24
252.5	0.947317	0.866356	1.08923	0.976696	0.962698	0.968566	0.972756	1.06784	0.985441	0.953528	0.926595	0.78793	0.893576	1.0287	1.08415	0.953936	0.743509	0.96966	0.892659	0.648365	0.949341	0.648166	0.835114	1.01146	0.923483	0.0243013	24
255	0.930949	0.866661	1.07412	1.00603	0.950836	0.970418	0.978182	1.05417	0.988289	0.941536	0.924241	0.784689	0.899876	1.02777	1.08729	0.958498	0.729045	0.978511	0.913414	0.654109	0.965458	0.650887	0.834135	1.02016	0.924553	0.0243005	24
257.5	0.917184	0.880493	1.07689	0.983661	0.963538	0.971744	0.994601	1.06153	1.00207	0.971901	0.924786	0.791009	0.903375	1.02416	1.08595	0.965099	0.749784	0.981335	0.851514	0.659852	0.981575	0.653609	0.833702	0.99854	0.926163	0.0240681	24
260	0.904562	0.870025	1.0789	0.979073	0.963947	0.960651	0.962318	1.07061	0.998158	0.960235	0.957959	0.795438	0.91104	1.03134	1.08572	0.971272	0.748585	0.955347	0.937003	0.665595	0.997691	0.65633	0.861381	1.00401	0.9303	0.0235422	24
262.5	0.897371	0.875331	1.0626	0.981705	0.961028	0.978884	0.949772	1.06303	0.969115	0.952254	0.956984	0.807787	0.893333	1.06072	1.0855	0.972742	0.736635	0.966697	0.90873	0.671338	1.01381	0.659051	0.828053	1.03022	0.928445	0.0238804	24
265	0.902664	0.886487	1.05244	0.992947	0.96987	0.969993	1.00218	1.08427	0.959574	0.988783	0.973843	0.797559	0.914036	1.04053	1.08528	0.975676	0.732554	0.95585	0.887195	0.677081	1.02992	0.661773	0.831505	1.04409	0.934005	0.0243009	24
267.5	0.906929	0.890555	1.06352	0.971128	0.949406	0.980156	0.995642	1.09465	0.97248	0.973785	0.986983	0.805512	0.930642	1.04832	1.08506	0.988803	0.73324	0.877146	0.923441	0.682824	1.04604	0.664494	0.835543	1.01807	0.934349	0.0241791	24
270	0.89021	0.881803	1.03208	0.982416	0.94686	0.953774	0.966495	1.09671	0.97496	0.939879	1.00012	0.808798	0.934356	1.03347	1.08484	0.989518	0.739516	0.966697	0.937003	0.688567	1.06216	0.667215	0.848535	1.05163	0.936567	0.0236942	24
272.5	0.903116	0.889917	1.05178	1.0109	0.983542	0.951173	1.00044	1.08296	0.973448	0.991349	1.01326	0.822528	0.954167	1.01574	1.08462	0.995805	0.734742	0.95585	0.945943	0.69431	1.01381	0.669937	0.831161	1.02188	0.941349	0.023315	24
275	0.896835	0.879158	1.0164	0.983457	0.968349	0.968493	0.942207	1.09562	0.981757	0.981229	1.0264	0.837289	0.957392	1.03266	1.0844	1.00101	0.742152	0.962513	0.957965	0.700053	1.02992	0.672658	0.835114	1.00315	0.93984	0.0227677	24
277.5	0.895234	0.897248	1.03061	1.01907	0.979178	0.968432	0.932372	1.0722	0.966848	0.990067	1.03954	0.841432	0.965876	1.02404	1.08417	1.01139	0.745258	0.947865	0.969216	0.705796	1.04604	0.675379	0.834135	0.961263	0.941778	0.0225696	24
280	0.880218	0.888811	1.03169	0.967011	0.977184	0.946876	0.955753	1.0884	0.937922	0.956141	1.05268	0.84751	0.972102	0.989851	1.08395	1.00837	0.750159	0.96966	0.980467	0.711539	1.06216	0.678101	0.833702	0.978125	0.939516	0.0223798	24
282.5	0.882007	0.894246	1.03854	0.987291	0.966236	0.959708	0.94798	1.10725	0.928115	0.951462	1.06582	0.86171	0.978354	1.04832	1.08373	1.01758	0.753968	0.978511	0.991718	0.717282	1.01381	0.680822	0.861381	1.00305	0.94662	0.0224708	24
285	0.883326	0.897991	1.0272	0.994176	0.96364	0.956122	0.96791	1.1193	0.935675	0.907618	1.07896	0.873915	0.997294	1.03347	1.08351	1.03186	0.757288	0.981335	1.00297	0.723025	1.02992	0.683544	0.828053	0.979207	0.947388	0.0228342	24
287.5	0.879257	0.895649	1.02807	0.999091	0.995811	0.955687	0.956642	1.12315	0.930042	0.905418	1.0921	0.877092	0.960328	1.01574	1.08329	1.04394	0.766237	0.955347	1.01422	0.728768	1.04604	0.686265	0.831505	0.958052	0.946989	0.0228046	24
290	0.87166	0.893206	1.02785	1.01016	0.993871	0.959185	0.952335	1.1254	0.93435	0.908619	1.10524	0.886348	1.00319	1.03266	1.08307	1.04338	0.762723	0.966697	1.02547	0.734511	1.06216	0.688986	0.835543	0.933777	0.951683	0.0232934	24
292.5	0.868374	0.901585	1.03793	1.00779	0.983179	0.962978	0.915329	1.0997	0.927795	0.89135	1.11838	0.898429	1.00372	1.01637	1.08285	1.04475	0.772793	0.95585	1.03672	0.740254	1.01381	0.691708	0.848535	0.960735	0.949205	0.0224397	24
295	0.863048	0.904887	1.0197	0.999927	1.00004	0.967959	0.917766	1.09435	0.928995	0.887738	1.13152	0.926476	0.999861	1.0099	1.08262	1.04233	0.781917	0.877146	1.04797	0.745998	1.02992	0.694429	0.831161	0.93829	0.946832	0.0226088	24
297.5	0.854877	0.896645	1.01873	1.00248	0.975314	0.959627	0.957575	1.0991	0.911288	0.922352	1.14466	0.934984	0.996381	1.00342	1.0824	1.03788	0.787578	0.966697	1.05923	0.751741	1.04604	0.69715	0.835114	0.911248	0.952188	0.0224688	24
300	0.863359	0.896446	1.00317	1.0136	0.996317	0.964387	0.941715	1.08825	0.885955	0.887029	1.1578	0.943842	1.00447	0.996953	1.08218	1.03131	0.791945	0.95585	1.07048	0.757484	1.06216	0.699872	0.834135	0.901692	0.951267	0.0227931	24
302.5	0.86525	0.87973	1.01178	1.0019	1.00818	0.95572	0.934285	1.09352	0.873716	0.872391	1.17094	0.94571	1.02889	0.990481	1.08196	1.01977	0.78921	0.962513	1.08173	0.763227	1.01381	0.702593	0.833702	0.969063	0.952086	0.0229613	24
305	0.862754	0.890297	0.997161	1.00377	0.987449	0.972081	0.912264	1.10447	0.93789	0.930154	1.18408	0.953775	1.03264	0.98401	1.08174	1.01404	0.803303	0.947865	1.09298	0.76897	1.02992	0.705314	0.861381	0.936967	0.958137	0.0223482	24
307.5	0.87919	0.893569	1.00128	0.979427	0.995332	0.962897	0.926561	1.10929	0.938524	0.865512	1.19722	0.952365	1.02525	0.977539	1.08152	1.0186	0.792883	0.96966	1.10423	0.774713	1.04604	0.708036	0.828053	0.891118	0.954951	0.023381	24
310	0.851264	0.901085	1.0185	0.993676	0.966423	0.964437	0.920243	1.10821	0.941536	0.874593	1.21036	0.969026	1.02921	0.971068	1.0813	1.02825	0.796599	0.978511	1.11548	0.780456	1.06216	0.710757	0.831505	0.902721	0.95864	0.0238466	24
312.5	0.860648	0.89955	1.027	1.01026	0.996729	0.960018	0.933303	1.12085	0.939046	0.868006	1.2235	0.960254	1.02371	0.964596	1.08107	1.03522	0.797236	0.981335	1.12673	0.786199	1.01381	0.713478	0.835543	0.916303	0.961433	0.0239709	24
315	0.863087	0.896996	1.00565	1.0275	0.989645	0.974271	0.931544	1.11709	0.927395	0.876374	1.23665	0.977635	1.04647	0.958125	1.08085	1.0285	0.812743	0.955347	1.13798	0.791942	1.02992	0.7162	0.848535	0.921388	0.964661	0.0239868	24

## Sheet: Wt + MSP+ITZ
PI4P Removal from Golgi
HeLa Wt + MSP domain + ITZ
Experiments:
200214_Optogenetics
200313_PI4POpto
Measure: (FROI-FBkg)/(FWholeCell-FBkg) Normalized for F measured at t1
Time	Cell1	Cell2	Cell3	Cell4	Cell5	Cell6	Cell7	Cell8	Cell9	Cell10	Cell11	Cell12	Cell13	Cell14	Cell15	Cell16	Average	ES	N
0	1	1	1	1	1	1	1	1	1	1	1	1	1	1	1	1	1	0	16
2.5	1.01157	0.985959	1.01083	0.992348	1.01762	1.00982	0.9948	1.01606	0.980516	0.981086	1.01081	0.990701	0.964591	0.987637	1.01853	0.966736	0.996226	0.00445721	16
5	0.998482	0.9888	1.05986	1.03708	1.04154	0.996854	0.998985	0.998157	0.993554	0.992332	1.02709	1.00223	1.01272	0.994097	1.02146	0.999768	1.01019	0.00526826	16
7.5	0.997201	0.986273	1.02392	0.998856	1.01458	0.992938	1.00321	0.993392	0.996241	0.975875	1.02175	0.987449	0.979681	1.00382	0.994836	0.980417	0.996903	0.00353394	16
10	0.982726	0.983904	1.06631	0.99443	1.02087	1.01678	0.993861	0.997167	0.996474	0.977539	1.05093	1.00871	1.03938	1.00426	0.997763	0.992832	1.00775	0.00632448	16
12.5	0.980605	0.978388	1.0541	0.995147	1.02115	1.00313	0.998078	0.991369	0.988312	0.984144	1.05907	1.03105	1.03625	1.00112	1.00202	0.996227	1.00751	0.00632527	16
15	0.993422	0.971521	1.04542	0.990235	1.03257	1.00869	0.997998	1.00227	0.975462	0.976036	1.06008	1.02538	1.01522	1.00403	1.01616	0.960145	1.00467	0.00687304	16
17.5	0.983613	0.979042	1.06744	0.982176	1.03005	1.02206	1.00825	1.00157	0.974488	0.985703	1.03426	0.994983	0.970177	1.00947	0.996215	1.00943	1.00306	0.00646179	16
20	0.968817	0.9659	1.03278	0.976193	1.02587	1.01296	1.00252	0.990103	0.961945	0.993723	1.06262	0.98466	1.00878	1.02257	1.03771	1.02373	1.00443	0.00725172	16
22.5	0.980841	0.980691	1.00755	0.960229	1.02311	1.02193	1.01021	0.988525	0.974469	0.989875	1.02899	0.979057	1.00962	1.00303	1.00256	0.970844	0.995721	0.005135	16
25	0.970882	0.96699	1.06286	0.98056	1.07752	1.00831	1.01047	0.98486	0.981653	0.989008	1.04877	0.963652	1.02889	1.01517	1.03845	1.0005	1.00803	0.00874425	16
27.5	0.963472	0.972408	1.02856	0.980684	1.09342	1.01464	1.00603	0.966714	0.961454	1.00286	1.05042	0.924629	1.03121	1.00172	1.01611	0.98704	1.00009	0.0101018	16
30	0.958348	0.956465	0.972394	0.985013	1.0701	0.998525	0.998793	0.984927	0.972098	1.00458	1.05986	0.945235	1.06393	1.00706	1.03367	0.993443	1.00028	0.00967287	16
32.5	0.959481	0.958832	1.01515	0.960084	1.08941	1.01223	1.02259	0.974519	0.990328	0.983898	1.05915	0.956985	1.03907	0.992445	1.01635	1.00755	1.00238	0.00957027	16
35	0.967025	0.966239	1.06936	0.994789	1.11883	1.0553	1.02527	0.972092	0.946326	1.00128	1.06382	0.965307	1.0387	0.998339	1.03566	1.02934	1.01548	0.0118355	16
37.5	0.960724	0.962645	1.00353	0.954881	1.12562	1.0097	1.0198	0.972936	0.977214	1.00251	1.04786	0.944889	1.04212	1.00128	1.02409	1.00295	1.0033	0.0111858	16
40	0.959951	0.967488	1.06295	0.960101	1.11678	1.01828	1.01481	0.97923	0.957988	0.972202	1.05524	0.912694	1.0563	0.994079	1.02486	1.02886	1.00511	0.0129562	16
42.5	0.955554	0.963238	1.04362	0.956704	1.11355	1.038	1.0301	0.968895	0.950316	0.965146	1.09475	0.909044	1.05815	1.01168	1.04583	1.08631	1.01193	0.0151437	16
45	0.962103	0.956786	1.06562	0.93202	1.15422	1.04396	1.03492	0.957865	0.975887	0.963151	1.06301	0.910791	1.09158	0.989561	1.06061	1.10352	1.0166	0.0174747	16
47.5	0.953678	0.94478	1.07551	0.93872	1.18166	1.04313	1.0137	0.967685	0.972653	0.968964	1.08769	0.92752	1.08849	1.01597	1.05866	1.11059	1.02184	0.0184305	16
50	0.960035	0.952102	1.0696	0.93771	1.13376	1.03131	1.02341	0.961089	0.993009	0.985109	1.1056	0.900705	1.08182	1.00709	1.08349	1.06602	1.01824	0.0167806	16
52.5	0.927901	0.938795	1.05196	0.919358	1.13149	1.00704	0.994389	0.952139	0.985217	0.99642	1.07762	0.953057	1.08678	0.998485	1.07052	1.10172	1.01206	0.0166827	16
55	0.922358	0.929579	1.0302	0.885864	1.13532	1.01841	1.00724	0.953303	0.969377	0.97866	1.10361	0.925752	1.11263	1.0167	1.06901	1.08802	1.00913	0.0191042	16
57.5	0.90461	0.920302	1.12845	0.906692	1.15161	1.04388	1.0182	0.949493	0.979759	0.988739	1.11325	0.964533	1.09407	1.01121	1.09387	1.14767	1.02602	0.0215859	16
60	0.901009	0.910294	1.06097	0.919492	1.13569	1.00435	1.01389	0.934036	0.993986	0.973451	1.10611	0.946855	1.05234	1.01811	1.09627	1.09471	1.0101	0.0188768	16
62.5	0.901557	0.913929	1.05397	0.894094	1.12202	1.00571	1.02216	0.941043	0.988554	0.942303	1.08092	0.922786	1.05857	1.02695	1.13677	1.09942	1.00692	0.0202142	16
65	0.886583	0.898654	1.06755	0.885834	1.14585	1.00179	1.02995	0.940393	1.00348	0.932488	1.09841	0.96366	1.06562	0.995702	1.1082	1.12328	1.00922	0.021593	16
67.5	0.871906	0.897951	1.06941	0.876082	1.12176	0.996014	1.02132	0.920628	1.01402	0.933288	1.07568	0.999226	1.05745	1.01431	1.09828	1.05458	1.00137	0.0199041	16
70	0.870269	0.889215	1.05737	0.888784	1.14168	1.01662	1.03755	0.926015	1.01198	0.927765	1.06783	0.978028	1.07942	1.00386	1.0991	1.08106	1.00478	0.0208953	16
72.5	0.84783	0.880917	1.06178	0.874483	1.15055	0.988767	1.03388	0.920572	0.98937	0.935409	1.08694	0.958545	1.10571	1.00579	1.11765	1.07525	1.00209	0.0233952	16
75	0.854456	0.875769	1.05496	0.858991	1.1695	1.01603	1.04065	0.926498	1.0118	0.973112	1.09291	0.958896	1.0869	1.00041	1.11352	1.00491	1.00246	0.0230139	16
77.5	0.83923	0.873991	1.08086	0.858933	1.19236	1.0213	1.04171	0.920503	0.996564	0.94722	1.11038	0.983879	1.0869	1.02813	1.12702	1.03895	1.00925	0.0252938	16
80	0.833994	0.868492	1.08873	0.870942	1.17642	1.00719	1.03298	0.924042	0.997265	0.928904	1.11176	0.969701	1.0606	1.01104	1.11855	1.02129	1.00137	0.0245082	16
82.5	0.809332	0.88031	1.08864	0.867893	1.13768	0.974824	1.03505	0.941992	1.01327	0.945479	1.10431	0.984441	1.0577	1.04525	1.13698	1.01724	1.00252	0.0240468	16
85	0.809445	0.871256	1.05494	0.864433	1.15435	1.02834	1.03857	0.928106	1.01229	0.929833	1.10318	0.993813	1.0294	1.0319	1.14498	0.99248	0.999207	0.024518	16
87.5	0.800726	0.878211	1.05482	0.855573	1.17303	0.978257	1.04684	0.918376	1.00989	0.905297	1.12181	0.975098	1.03906	1.01854	1.12012	0.991725	0.992961	0.0256395	16
90	0.798775	0.878405	1.04964	0.862869	1.17207	0.973347	1.03271	0.929949	0.996781	0.916021	1.12292	0.981324	1.05185	1.03382	1.15516	0.994368	0.996876	0.0260727	16
92.5	0.796671	0.878277	1.06584	0.847488	1.18778	0.939985	1.06707	0.938756	1.00677	0.900207	1.15076	0.979688	1.03563	1.02272	1.13641	0.952112	0.994135	0.0278499	16
95	0.794544	0.862635	1.09342	0.847679	1.16792	0.943338	1.05645	0.926894	1.03445	0.892246	1.11778	0.981595	0.997322	1.0105	1.1551	0.958341	0.990013	0.0277091	16
97.5	0.747209	0.819767	1.07111	0.845798	1.15935	1.03751	1.06242	0.928278	1.03777	0.902476	1.14407	0.97849	1.03177	1.03701	1.15017	0.989409	0.996413	0.0301423	16
100	0.747639	0.826358	1.09238	0.836504	1.16562	1.06598	1.04018	0.937044	1.02822	0.908162	1.13994	0.976261	1.01789	1.00651	1.1329	0.927786	0.990587	0.0301154	16
102.5	0.766435	0.833266	1.06642	0.824147	1.17377	1.07812	1.05701	0.935254	1.04163	0.907041	1.12661	0.996008	1.02973	1.00772	1.13839	0.954317	0.995992	0.0295647	16
105	0.75829	0.830776	1.06202	0.832785	1.12454	1.06781	1.05199	0.936956	1.01965	0.914669	1.13671	0.959972	0.979924	0.999436	1.10722	0.940782	0.98272	0.0277068	16
107.5	0.762438	0.831997	1.05913	0.809809	1.15645	1.06009	1.06698	0.933005	1.04882	0.910815	1.12827	1.01772	0.973587	0.991236	1.12934	0.940747	0.988776	0.0294033	16
110	0.764773	0.835163	1.06602	0.829866	1.12322	1.07743	1.07989	0.946152	1.02783	0.904916	1.14143	1.01283	0.976025	1.02308	1.13454	0.968788	0.994497	0.0285736	16
112.5	0.767989	0.849051	1.0768	0.842728	1.10608	1.0458	1.0711	0.938297	1.02635	0.914556	1.12625	1.00379	0.980619	1.00656	1.15496	0.96668	0.99235	0.0272346	16
115	0.778718	0.849849	1.06004	0.824766	1.07535	1.08354	1.05921	0.946679	1.02018	0.915958	1.13241	1.00865	0.978545	1.02078	1.12473	0.941971	0.988836	0.026436	16
117.5	0.780517	0.861147	1.06642	0.833091	1.07962	1.08075	1.09003	0.948059	1.03048	0.918158	1.1279	1.00425	0.955183	1.01119	1.14227	0.959869	0.993059	0.0266618	16
120	0.793781	0.869812	1.04792	0.829402	1.09688	1.08609	1.08083	0.949004	1.02984	0.912789	1.13044	1.01798	0.957044	1.03372	1.13121	0.962984	0.995608	0.0261327	16
122.5	0.796719	0.871996	1.02164	0.826871	1.0825	1.10316	1.0819	0.950117	1.01926	0.910134	1.11705	1.01206	0.980901	1.0336	1.14769	0.962514	0.994882	0.0259308	16
125	0.807195	0.885133	1.09707	0.811881	1.08757	1.12239	1.07861	0.955813	1.04671	0.931325	1.10609	1.01213	0.985151	1.02999	1.11745	0.999287	1.00461	0.0257257	16
127.5	0.818692	0.894419	1.0495	0.831112	1.09672	1.12542	1.08577	0.93439	1.05057	0.928781	1.08553	1.00021	0.970848	1.04464	1.14013	0.989688	1.0029	0.0249278	16
130	0.827488	0.89422	1.05561	0.833191	1.09401	1.11464	1.08673	0.930104	1.04943	0.917575	1.08938	0.992545	0.964265	1.02307	1.12825	0.970925	0.998214	0.0243744	16
132.5	0.837528	0.899316	1.02357	0.827849	1.07846	1.10812	1.07107	0.941231	1.02972	0.931632	1.08003	0.979614	0.962966	1.01616	1.12249	0.973538	0.992705	0.0225406	16
135	0.828333	0.902065	1.02744	0.836123	1.07743	1.10652	1.06873	0.952477	1.04283	0.937815	1.08023	0.987563	0.955723	1.03464	1.12774	0.987426	0.997068	0.0226188	16
137.5	0.84895	0.90467	1.02811	0.833865	1.08922	1.10827	1.06858	0.946042	1.03515	0.923987	1.08836	0.983772	0.970286	1.01313	1.15466	0.979402	0.998528	0.0230976	16
140	0.857521	0.910607	1.04027	0.862194	1.06134	1.08802	1.06902	0.939227	1.0178	0.934036	1.08857	0.993168	0.970133	1.03196	1.11185	1.00012	0.99849	0.0199807	16
142.5	0.858713	0.911648	1.04258	0.833805	1.09187	1.11587	1.07902	0.955167	1.01219	0.917482	1.07397	0.967246	0.956477	1.01562	1.12296	1.00895	0.997722	0.0221808	16
145	0.863381	0.916508	1.04302	0.826329	1.06119	1.11701	1.07663	0.949005	1.02264	0.940573	1.08912	0.960222	1.00445	1.01042	1.10507	0.999995	0.999097	0.0212407	16
147.5	0.868244	0.923125	1.03453	0.815529	1.06052	1.1166	1.08737	0.958206	1.05216	0.941654	1.07926	0.949837	0.93543	1.00355	1.10658	1.00592	0.996158	0.0219274	16
150	0.866701	0.926975	1.03021	0.827302	1.06898	1.10286	1.06385	0.957903	1.03771	0.946005	1.06163	0.95819	0.928222	1.02824	1.11075	1.00885	0.995273	0.0207007	16
152.5	0.877229	0.91778	1.04884	0.819266	1.06226	1.12612	1.06039	0.945396	1.05489	0.928348	1.08177	0.978911	0.927461	1.01737	1.08536	1.00886	0.996266	0.0215327	16
155	0.896155	0.919928	1.00221	0.81826	1.0621	1.06916	1.06878	0.950964	1.04414	0.930039	1.08449	0.946705	0.936234	1.00763	1.08774	1.04822	0.992047	0.019996	16
157.5	0.906695	0.906747	1.03553	0.8246	1.03978	1.1199	1.06768	0.94559	1.03913	0.886829	1.08317	0.967083	0.964738	1.04006	1.09789	1.09652	1.00137	0.022078	16
160	0.904906	0.918106	0.987529	0.811068	1.04625	1.06854	1.05701	0.953557	1.06453	0.868263	1.05627	0.93289	0.939993	1.02539	1.08274	1.09231	0.988085	0.0214452	16
162.5	0.898677	0.917892	1.02917	0.801419	1.0654	1.11408	1.06905	0.967941	1.05322	0.913488	1.05828	0.925189	0.986618	1.03378	1.08292	1.11826	1.00221	0.0225271	16
165	0.907743	0.923683	1.00899	0.813588	1.0504	1.06914	1.08229	0.95776	1.04279	0.904796	1.09371	0.956913	0.967625	1.0749	1.0869	1.10622	1.00296	0.0215953	16
167.5	0.921952	0.916352	1.02702	0.80713	1.06232	1.12944	1.08013	0.95133	1.07498	0.898774	1.07942	0.941257	1.00206	1.0593	1.03627	1.07532	1.00394	0.0220165	16
170	0.908907	0.918295	1.00611	0.804519	1.06107	1.11813	1.08444	0.948485	1.04478	0.886565	1.0608	0.9215	1.01067	1.04895	1.04416	1.07422	0.996351	0.0219071	16
172.5	0.904439	0.914846	1.01362	0.805318	1.04395	1.0839	1.07596	0.95365	1.05031	0.892426	1.07579	0.935471	0.975279	1.05443	1.04436	1.08778	0.99447	0.0212257	16
175	0.908883	0.916895	1.02145	0.819333	1.06099	1.07273	1.07326	0.945756	1.04888	0.904524	1.05088	0.935057	0.98728	1.06103	1.05211	1.11404	0.998319	0.0207667	16
177.5	0.917934	0.912202	1.0104	0.821946	1.08721	1.06625	1.07719	0.958143	1.01828	0.899881	1.06908	0.947178	0.969139	1.04436	1.0752	1.14369	1.00113	0.0217064	16
180	0.909149	0.906651	1.00544	0.835474	1.09823	1.1025	1.08014	0.946622	1.04482	0.893037	1.07566	0.923011	1.00486	1.0536	1.08832	1.14537	1.00706	0.0232404	16
182.5	0.905675	0.901302	0.983705	0.822907	1.06448	1.06224	1.0798	0.955191	1.03944	0.915375	1.08054	0.914473	0.997298	1.04817	1.07294	1.09663	0.996261	0.0210113	16
185	0.901683	0.905657	0.963426	0.828368	1.07208	1.07211	1.08702	0.948811	1.03499	0.866003	1.07827	0.888189	0.983347	1.00075	1.07015	1.10819	0.988065	0.0225816	16
187.5	0.914712	0.904725	0.967974	0.838596	1.07522	1.01993	1.06986	0.95138	1.03366	0.862952	1.06042	0.879909	1.01298	0.998393	1.05132	1.1122	0.98464	0.021049	16
190	0.905028	0.895424	0.960094	0.815404	1.04952	1.00157	1.06552	0.941663	1.03	0.88568	1.05202	0.878799	1.01396	1.01258	1.0633	1.14712	0.982355	0.0221888	16
192.5	0.921292	0.899582	0.947158	0.826031	1.05898	1.05121	1.06197	0.944711	1.04241	0.870957	1.06207	0.886163	1.01427	0.968748	1.05932	1.16591	0.986299	0.0229871	16
195	0.902067	0.891391	0.957994	0.835106	1.06802	1.02293	1.0634	0.935683	1.03817	0.871952	1.05294	0.890183	0.994914	0.998913	1.03816	1.12723	0.980565	0.0212125	16
197.5	0.907664	0.89844	0.963404	0.844706	1.04938	1.00733	1.05339	0.95115	1.01626	0.872925	1.07391	0.894231	0.96784	0.983657	1.06296	1.21652	0.985236	0.0236069	16
200	0.916854	0.898022	0.948992	0.835922	1.0588	0.99253	1.05728	0.949825	1.05293	0.87902	1.05913	0.895091	0.95485	0.97792	1.07045	1.19524	0.983928	0.0232346	16
202.5	0.911954	0.885053	0.949263	0.833069	1.05271	1.01535	1.06297	0.939269	1.02565	0.880432	1.06049	0.89068	1.00495	1.02418	1.06561	1.17834	0.986249	0.022943	16
205	0.916842	0.897147	0.932211	0.827676	1.03143	1.01061	1.04429	0.941052	1.02703	0.856277	1.04488	0.877763	0.999395	0.966533	1.08327	1.15874	0.975947	0.0224222	16
207.5	0.917179	0.89342	0.969453	0.855314	1.0488	0.98542	1.03434	0.949912	1.03337	0.851773	1.04289	0.857558	0.959978	0.990936	1.07022	1.15051	0.975692	0.0215441	16
210	0.921764	0.884598	0.937995	0.835445	1.05074	1.02683	1.04329	0.953521	1.04394	0.868771	1.05371	0.866904	0.943784	0.972647	1.03826	1.14845	0.974416	0.0218306	16
212.5	0.914381	0.88495	0.954518	0.827753	1.03733	1.00122	1.0392	0.953368	1.03327	0.849506	1.05724	0.894662	0.95477	0.976671	1.06099	1.15114	0.974436	0.021817	16
215	0.917264	0.893376	0.939207	0.840151	1.04991	0.980488	1.04317	0.95548	1.03343	0.849626	1.05726	0.904129	1.00459	0.965728	1.05742	1.18121	0.979527	0.0224537	16
217.5	0.912352	0.898245	0.955837	0.841209	1.06605	0.996919	1.05341	0.962322	1.0257	0.853129	1.06464	0.876957	1.01863	0.99809	1.04406	1.14994	0.982342	0.0219069	16
220	0.912294	0.897757	0.964423	0.849775	1.06592	1.00721	1.04433	0.942642	1.01117	0.834524	1.0544	0.853627	1.02706	0.970848	1.0364	1.22064	0.980814	0.0249352	16
222.5	0.908554	0.905439	0.962664	0.849496	1.03786	0.994377	1.04916	0.937767	1.01185	0.821363	1.07967	0.9078	1.02524	0.981267	1.02498	1.15766	0.978447	0.0218936	16
225	0.91288	0.906584	0.926196	0.83784	1.02306	1.01124	1.04324	0.942803	1.02206	0.825407	1.06943	0.914538	1.02002	0.987786	1.0436	1.24533	0.983251	0.0254215	16
227.5	0.914238	0.904471	0.942189	0.85892	1.01781	1.02104	1.05547	0.918061	1.00853	0.845911	1.07145	0.904405	1.01966	0.993797	1.03858	1.19089	0.981589	0.0224785	16
230	0.901866	0.90573	0.915299	0.864693	1.02445	1.03343	1.04823	0.925364	0.984673	0.840949	1.07226	0.894699	1.03626	0.984071	1.02852	1.1597	0.976262	0.0218252	16
232.5	0.91792	0.908219	0.955589	0.85833	1.04184	1.01289	1.04058	0.93162	1.00388	0.844811	1.04577	0.891531	1.06841	0.98539	1.05948	1.19021	0.984779	0.0227583	16
235	0.918359	0.901898	0.923613	0.861231	1.03448	1.04794	1.05659	0.934398	1.02093	0.824021	1.05166	0.890737	1.02663	0.993156	1.02472	1.18611	0.981029	0.023151	16
237.5	0.919866	0.901605	0.947383	0.868966	1.04595	1.03797	1.06691	0.924894	0.988416	0.816714	1.06964	0.917214	1.03153	0.993534	1.02734	1.18424	0.983886	0.0229779	16
240	0.913668	0.900326	0.933196	0.858975	1.06446	1.03755	1.07113	0.928455	0.997572	0.818871	1.07772	0.909272	1.02625	1.00434	1.03342	1.18829	0.985219	0.0240095	16
242.5	0.908147	0.901566	0.939266	0.863385	1.06399	1.04556	1.06809	0.911081	1.01743	0.836844	1.07478	0.889121	1.05373	1.00172	1.01725	1.1724	0.985272	0.0235795	16
245	0.929082	0.902645	0.907333	0.878504	1.02975	1.03008	1.05427	0.926041	1.01831	0.824838	1.0866	0.893222	1.02965	0.980203	1.01112	1.19525	0.981056	0.0234301	16
247.5	0.905629	0.91045	0.950948	0.867883	1.04604	1.03491	1.05259	0.934491	1.03355	0.819596	1.11633	0.917525	1.01763	1.00015	1.01524	1.2026	0.989099	0.024228	16
250	0.925116	0.9014	0.929765	0.835054	1.04704	1.04933	1.06101	0.930934	1.02148	0.820732	1.07914	0.890733	1.02245	1.00174	1.00023	1.21322	0.983086	0.0252324	16
252.5	0.929236	0.916496	0.921041	0.83847	1.02892	1.06289	1.05558	0.915812	1.02213	0.828267	1.06587	0.907171	1.00719	1.0144	1.01443	1.20602	0.983371	0.0242128	16
255	0.932313	0.907992	0.934374	0.842741	1.01283	1.06244	1.05468	0.925834	1.02114	0.817116	1.06693	0.933856	1.02894	0.987919	1.0071	1.14346	0.979979	0.021659	16
257.5	0.931426	0.906953	0.931636	0.844053	1.03512	1.0935	1.06118	0.932473	1.0323	0.81791	1.0773	0.935856	1.01197	1.00135	1.0214	1.18601	0.988777	0.0239886	16
260	0.94582	0.903099	0.931802	0.834465	1.03969	1.09203	1.06325	0.933787	1.04347	0.813808	1.07928	0.949994	1.03409	0.995265	1.01174	1.18474	0.99102	0.0243509	16
262.5	0.952256	0.91483	0.917915	0.829905	1.00775	1.07635	1.06713	0.9292	1.04548	0.803202	1.08505	0.948618	1.07352	1.00172	0.986667	1.20227	0.990116	0.0255129	16
265	0.947045	0.919288	0.900901	0.830965	0.994613	1.08933	1.07581	0.932897	1.04182	0.821424	1.06898	0.944123	1.0661	0.988167	0.984152	1.15213	0.984859	0.0234276	16
267.5	0.949208	0.915875	0.896697	0.843228	1.00439	1.07452	1.07151	0.932421	1.05568	0.81337	1.08306	0.937302	1.07273	1.01331	0.998085	1.23347	0.993429	0.0264741	16
270	0.939906	0.922893	0.905742	0.854526	0.997783	1.06018	1.06664	0.94345	1.03368	0.836092	1.0744	0.937687	1.03409	1.01191	0.992115	1.19916	0.98814	0.0230097	16
272.5	0.952879	0.923569	0.886354	0.836946	0.97279	1.07481	1.06596	0.930675	1.0312	0.834871	1.06207	0.969386	1.05635	1.01791	0.995536	1.16819	0.986218	0.0228083	16
275	0.949843	0.92916	0.869533	0.846619	0.957775	1.04974	1.07859	0.93267	1.03144	0.846733	1.09091	0.946838	1.09871	0.984526	0.977312	1.22247	0.988304	0.0255296	16
277.5	0.953627	0.911169	0.879692	0.846247	0.983147	1.02913	1.06275	0.9308	1.03705	0.843313	1.10034	0.936276	1.09915	1.02847	0.980312	1.20971	0.989449	0.0251076	16
280	0.964518	0.910185	0.893009	0.842506	0.984708	1.09317	1.07139	0.936962	1.01453	0.836342	1.0876	0.940708	1.07624	0.995573	0.982816	1.19555	0.989113	0.0245133	16
282.5	0.964045	0.910762	0.882077	0.832058	0.976946	1.05084	1.07177	0.935466	0.998705	0.846893	1.08915	0.959629	1.1147	1.00278	0.981182	1.15876	0.985985	0.0234875	16
285	0.95584	0.911851	0.872117	0.823226	0.944077	1.0872	1.06844	0.927935	1.02003	0.839841	1.06323	0.957782	1.13509	1.01598	1.00009	1.21287	0.989725	0.0267623	16
287.5	0.986254	0.903219	0.87796	0.817122	0.965014	1.09587	1.07078	0.941874	1.02709	0.833839	1.07829	0.95766	1.11162	0.999573	0.97406	1.16502	0.987828	0.0250795	16
290	0.961469	0.908581	0.872059	0.827494	0.934571	1.07717	1.06789	0.942829	1.0304	0.853601	1.06538	0.94874	1.10207	1.02772	0.967569	1.19874	0.986642	0.0251845	16
292.5	0.970235	0.906235	0.902905	0.839247	0.943208	1.07456	1.06546	0.951562	1.0146	0.848728	1.07634	0.953231	1.12017	1.00617	0.965031	1.15763	0.987207	0.0232204	16
295	0.955914	0.907523	0.880927	0.839462	0.946327	1.07705	1.068	0.945881	1.04114	0.832575	1.05937	0.971773	1.12649	1.0019	0.972233	1.18943	0.988501	0.0251169	16
297.5	0.969458	0.916763	0.894147	0.835355	0.939808	1.10317	1.06753	0.950321	1.04025	0.853148	1.07976	0.954622	1.14585	1.023	0.963394	1.17786	0.994653	0.0252814	16
300	0.970499	0.914455	0.872334	0.820923	0.922894	1.07934	1.06738	0.940881	1.05435	0.850263	1.08782	0.978111	1.17502	1.02507	0.999591	1.22512	0.999003	0.0283078	16
302.5	0.96892	0.905475	0.877866	0.822598	0.933904	1.10452	1.07027	0.938188	1.0538	0.838435	1.07786	0.965982	1.16829	1.02776	0.987993	1.19949	0.996335	0.0277923	16
305	0.96061	0.903602	0.908684	0.82528	0.937156	1.08543	1.06332	0.947637	1.04097	0.857884	1.07162	0.962235	1.14075	1.04196	0.984342	1.15592	0.992963	0.0242793	16
307.5	0.96411	0.907414	0.886625	0.815834	0.925358	1.08112	1.06554	0.946401	1.02082	0.852585	1.06849	0.974043	1.15036	1.02907	0.988557	1.17275	0.990567	0.025453	16
310	0.973984	0.913485	0.891754	0.824888	0.912992	1.0643	1.06881	0.955875	1.05867	0.865236	1.03955	0.958084	1.14442	1.03164	0.9674	1.13983	0.988182	0.0236371	16
312.5	0.957004	0.907506	0.890408	0.814666	0.912733	1.07219	1.07107	0.954579	1.04039	0.88124	1.05745	1.01356	1.13159	1.04729	0.964696	1.17042	0.992925	0.0245768	16
315	0.970463	0.915222	0.874675	0.818364	0.91537	1.07484	1.0757	0.949374	1.06229	0.86691	1.05306	0.984846	1.0962	1.00858	0.9754	1.16263	0.987746	0.0238428	16

## Sheet: VAPDKO + MSP
PI4P Removal from Golgi
HeLa VAPB DKO + MSP domain
Experiments:
200313_PI4POpto
200206_Optogenetics
191011_MSPrecruitment
190905_OptoVAPB+ITZ
Measure: (FROI-FBkg)/(FWholeCell-FBkg) Normalized for F measured at t1
Time	Cell1	Cell2	Cell3	Cell4	Cell5	Cell6	Cell7	Cell8	Cell9	Cell10	Cell11	Cell12	Cell13	Cell14	Cell15	Cell16	Cell17	Cell18	Cell19	Cell20	Average	ES	N
0	1	1	1	1	1	1	1	1	1	1	1	1	1	1	1	1	1	1	1	1	1	0	20
2.5	0.994771	0.990639	0.985223	0.972066	1.00899	0.977495	0.986824	0.993661	0.9838	1.03016	0.984048	1.102	0.999968	0.989392	1.02791	0.997464	0.99158	1.00204	0.991521	1.00318	1.00064	0.00623906	20
5	0.989178	1.00955	0.998447	0.97143	1.01008	0.938305	1.00495	0.985118	1.0168	0.999842	0.955178	1.02656	0.991187	0.991541	1.04349	1.05625	0.993208	1.00326	0.96713	1.00279	0.997714	0.00616057	20
7.5	1.00904	1.00752	0.989591	0.985338	0.993497	0.907536	1.0039	0.995206	1.02577	0.976479	0.982296	1.01801	1.0231	0.968561	1.11241	1.05144	0.983378	1.00276	0.955059	0.998136	0.999451	0.00889298	20
10	1.01196	1.01343	0.989968	0.968398	0.992067	0.923486	1.01091	0.986236	1.04007	0.973076	0.995395	1.003	0.999235	0.970486	1.09409	1.05723	0.970995	1.00505	0.932144	0.99581	0.996652	0.0086258	20
12.5	1.0206	1.01603	1.0032	0.955803	0.987064	0.925478	1.01407	1.02827	0.992693	0.974204	0.998343	0.97859	1.02923	0.932977	1.04861	1.05056	0.979349	1.01106	0.925896	1.00527	0.993865	0.00829128	20
15	1.02287	0.997105	0.996114	0.968967	0.967262	0.926083	1.01934	1.01731	0.924224	0.977614	0.97467	0.984345	1.01819	0.933031	0.99488	1.07156	0.969289	0.998134	0.909195	0.993888	0.983203	0.00879549	20
17.5	1.02779	1.00259	1.00163	0.955584	0.945254	0.914346	1.02455	1.06242	0.875052	0.965745	0.99221	1.06303	1.02008	0.935599	1.0347	1.04311	0.954555	1.00872	0.895664	0.994036	0.985833	0.0120381	20
20	1.03885	1.02406	1.02529	0.961399	0.945698	0.872162	1.0158	1.03895	0.87302	0.971883	1.00304	1.0075	1.01172	0.952852	1.01874	1.08116	0.942973	1.00192	0.871851	0.990791	0.982484	0.013097	20
22.5	1.02774	1.01661	1.04582	0.924348	0.941439	0.889834	1.02735	1.09869	0.937439	0.946944	0.993479	0.999212	1.04253	0.933011	1.01658	1.07726	0.93879	0.996839	0.864334	1.01703	0.986764	0.0138776	20
25	1.04949	0.999592	1.0121	0.944975	0.928698	0.9161	1.03768	1.06023	0.916895	0.944239	0.991439	1.00729	1.03655	0.930441	1.05534	1.09592	0.915738	1.0095	0.841525	0.987044	0.984039	0.0143957	20
27.5	1.03466	1.0249	1.04095	0.938971	0.925069	0.906593	1.06489	1.07513	0.899048	0.950851	1.01634	1.04402	1.01021	0.921567	1.00817	1.08155	0.893403	1.01151	0.79918	1.00555	0.982628	0.0166245	20
30	1.02192	1.01917	1.00996	0.948598	0.910002	0.917654	1.04511	1.07795	0.882408	0.945807	1.03388	1.10692	1.05023	0.948586	0.724898	1.05861	0.993208	1.00326	0.96713	1.00279	0.983404	0.0189073	20
32.5	1.01962	1.02604	1.02706	0.920711	0.921702	0.886545	1.04314	1.11369	0.878098	0.949028	1.02243	1.05531	0.99151	0.92406	0.70907	1.05335	0.983378	1.00276	0.955059	0.998136	0.974035	0.0195368	20
35	1.02467	1.00456	1.00106	0.925689	0.914558	0.902415	1.04386	1.14566	0.916212	0.961203	0.998905	1.06545	1.02946	0.925352	0.913869	1.0421	0.970995	1.00505	0.932144	0.99581	0.985951	0.0141513	20
37.5	1.01978	1.00837	1.01498	0.917287	0.907592	0.905244	1.04111	1.13496	0.879946	0.951821	1.05933	1.02162	0.995728	0.905532	0.841015	1.05096	0.979349	1.01106	0.925896	1.00527	0.978843	0.01619	20
40	1.00864	1.02607	1.02974	0.899998	0.905513	0.895801	1.07379	1.18126	0.990628	0.940275	1.04917	1.0893	0.993761	0.970446	0.988474	1.01234	0.969289	0.998134	0.909195	0.993888	0.996285	0.0157214	20
42.5	1.01884	1.00071	1.00989	0.865741	0.913196	0.886047	1.06177	1.18783	0.867266	0.959473	1.03388	1.05751	1.03404	0.970508	0.861486	0.99856	0.893784	0.996562	0.790038	0.986491	0.969681	0.0205325	20
45	1.03518	0.965207	0.990068	0.842346	0.903915	0.858066	1.0239	1.16196	0.831859	0.930613	1.05323	1.04056	0.988587	0.979683	0.85003	0.988652	0.857525	1.00375	0.770525	0.994918	0.953529	0.0214056	20
47.5	1.01004	0.95135	0.955429	0.820817	0.871467	0.801634	0.969449	1.05661	0.811195	0.920744	1.0221	1.04173	0.979392	0.937253	0.867145	0.948515	0.829773	0.982712	0.761307	0.954346	0.92465	0.0192061	20
50	0.994245	0.904988	0.91386	0.793248	0.836386	0.714723	0.919515	0.984243	0.748384	0.939271	0.983516	0.841587	0.911452	0.871559	0.777039	0.926289	0.807673	0.96116	0.732488	0.947746	0.875469	0.0197739	20
52.5	0.986509	0.868348	0.866282	0.732367	0.816736	0.674293	0.882165	0.926102	0.73196	0.921561	0.933305	0.856098	0.87007	0.776334	0.774975	0.878354	0.774424	0.936819	0.699535	0.916005	0.841112	0.0197909	20
55	0.95238	0.811597	0.802687	0.717095	0.776466	0.642571	0.83668	0.841185	0.724092	0.928865	0.916322	0.789052	0.842217	0.72067	0.727982	0.850407	0.750191	0.906407	0.687709	0.883642	0.805411	0.0194164	20
57.5	0.946659	0.780306	0.746203	0.722914	0.752012	0.61567	0.799818	0.854739	0.716509	0.934354	0.894544	0.749879	0.7926	0.662092	0.72277	0.816901	0.739944	0.88598	0.674418	0.868868	0.783859	0.0203979	20
60	0.920422	0.759911	0.712377	0.674329	0.725769	0.604947	0.800302	0.808051	0.68068	0.920193	0.866285	0.693375	0.735926	0.57671	0.792589	0.793623	0.723077	0.884808	0.655086	0.85603	0.759225	0.0221063	20
62.5	0.899705	0.731673	0.678265	0.63984	0.703725	0.595731	0.783139	0.790901	0.696559	0.910292	0.853642	0.705581	0.685383	0.541872	0.775895	0.762534	0.709288	0.86749	0.648497	0.836654	0.740833	0.0223558	20
65	0.886725	0.74151	0.666983	0.630626	0.677458	0.573805	0.753319	0.803843	0.671824	0.912829	0.81624	0.6381	0.678957	0.5079	0.739151	0.760991	0.697214	0.846026	0.636282	0.805125	0.722245	0.0232339	20
67.5	0.885586	0.728432	0.642279	0.612691	0.671624	0.590466	0.766062	0.775346	0.662346	0.891431	0.816316	0.696399	0.660491	0.480742	0.728234	0.726405	0.699831	0.84821	0.617315	0.768557	0.713438	0.0230375	20
70	0.870874	0.698718	0.620723	0.61847	0.658118	0.567892	0.758862	0.772364	0.662185	0.878775	0.801871	0.670955	0.635559	0.459791	0.711038	0.735773	0.692342	0.839716	0.603242	0.773632	0.701545	0.0236321	20
72.5	0.863871	0.689139	0.617895	0.618843	0.658881	0.58175	0.748976	0.766718	0.650913	0.877584	0.82463	0.664841	0.628363	0.443073	0.765877	0.706268	0.689543	0.833444	0.593651	0.770156	0.699721	0.024236	20
75	0.862723	0.685297	0.615833	0.613172	0.634326	0.575852	0.755522	0.762265	0.601446	0.900373	0.794944	0.691909	0.617628	0.442534	0.731126	0.700218	0.692427	0.828712	0.589614	0.752988	0.692445	0.0246803	20
77.5	0.860202	0.686892	0.6288	0.563578	0.646787	0.571583	0.722526	0.753016	0.631932	0.893587	0.798164	0.676179	0.611186	0.430421	0.721185	0.67543	0.679161	0.826741	0.575187	0.74068	0.684662	0.0248738	20
80	0.84072	0.684461	0.610477	0.597561	0.633504	0.58834	0.733979	0.750642	0.657739	0.856838	0.802572	0.731608	0.611063	0.430332	0.719291	0.657983	0.682804	0.822895	0.550703	0.75389	0.68587	0.0238654	20
82.5	0.847021	0.679183	0.615646	0.607022	0.639745	0.586363	0.71877	0.718207	0.677455	0.86104	0.779307	0.659052	0.603077	0.439475	0.718589	0.674973	0.680236	0.822341	0.552386	0.752652	0.681627	0.0229905	20
85	0.828186	0.675934	0.609346	0.606178	0.648978	0.575839	0.711994	0.736201	0.68641	0.874694	0.757093	0.647595	0.615108	0.431528	0.691329	0.647924	0.677377	0.817006	0.544656	0.733781	0.675858	0.0229475	20
87.5	0.827614	0.678226	0.62433	0.59572	0.654203	0.594883	0.691192	0.72396	0.695176	0.871603	0.76302	0.701683	0.589091	0.429369	0.719828	0.642139	0.677374	0.817309	0.546141	0.726746	0.67848	0.0229006	20
90	0.827459	0.667648	0.611083	0.607051	0.650386	0.601211	0.692694	0.735455	0.689615	0.868543	0.740853	0.712561	0.585698	0.416224	0.684609	0.655938	0.671342	0.819406	0.54348	0.734692	0.675797	0.0230873	20
92.5	0.820125	0.662142	0.619516	0.606545	0.655829	0.596205	0.671593	0.693567	0.727973	0.868642	0.757837	0.613763	0.580975	0.421314	0.713433	0.670062	0.685488	0.825884	0.541852	0.737809	0.673528	0.0232856	20
95	0.816233	0.656813	0.633968	0.593821	0.665959	0.599226	0.685241	0.69282	0.738198	0.859957	0.738088	0.662046	0.584518	0.418347	0.710968	0.671171	0.680268	0.834342	0.537629	0.724205	0.675191	0.022897	20
97.5	0.822744	0.660804	0.634932	0.60521	0.68226	0.606926	0.686079	0.696679	0.729631	0.843119	0.741067	0.683679	0.605781	0.415503	0.712115	0.648584	0.67851	0.826597	0.533363	0.739731	0.677666	0.0224067	20
100	0.814852	0.654079	0.630533	0.601848	0.679868	0.611822	0.676672	0.711753	0.708059	0.859878	0.753671	0.641787	0.606325	0.420365	0.720546	0.66118	0.683638	0.826577	0.533413	0.734653	0.676576	0.0225765	20
102.5	0.814793	0.668764	0.654919	0.598977	0.697418	0.610993	0.669248	0.730096	0.729138	0.852163	0.744536	0.667835	0.605321	0.431151	0.733755	0.669681	0.683757	0.8318	0.539442	0.736842	0.683531	0.0221146	20
105	0.817215	0.676415	0.655694	0.608948	0.680416	0.607254	0.681875	0.723128	0.729965	0.871531	0.749149	0.656697	0.59252	0.435356	0.724572	0.662258	0.694063	0.821704	0.534014	0.733146	0.682796	0.0223726	20
107.5	0.820591	0.674978	0.660066	0.61433	0.694481	0.613513	0.699229	0.721406	0.724615	0.87494	0.751586	0.775846	0.61099	0.427925	0.711775	0.667083	0.6968	0.81328	0.532566	0.740881	0.691344	0.022706	20
110	0.822135	0.678732	0.656566	0.61751	0.701271	0.62449	0.695453	0.733946	0.703925	0.881498	0.769361	0.696298	0.615265	0.438171	0.734741	0.6726	0.692769	0.817836	0.542285	0.740114	0.691748	0.0220925	20
112.5	0.82085	0.679541	0.653645	0.621034	0.712891	0.638199	0.690289	0.723237	0.728011	0.86559	0.759055	0.667046	0.603069	0.449213	0.733723	0.693897	0.706489	0.816787	0.534922	0.743051	0.692027	0.0215079	20
115	0.822726	0.681297	0.673089	0.635499	0.721964	0.642987	0.708281	0.744732	0.707462	0.873492	0.755757	0.724377	0.603609	0.463069	0.721097	0.6829	0.717093	0.810435	0.537429	0.734139	0.698072	0.020909	20
117.5	0.823107	0.696117	0.682646	0.641297	0.737033	0.647863	0.706277	0.779742	0.748864	0.875163	0.769663	0.688626	0.605199	0.463797	0.731576	0.714847	0.721227	0.814933	0.564135	0.746552	0.707933	0.0209311	20
120	0.833769	0.690033	0.682011	0.638028	0.735622	0.646893	0.725331	0.780151	0.755037	0.871114	0.78332	0.651361	0.626608	0.472437	0.733872	0.70907	0.723788	0.809302	0.578391	0.737618	0.709188	0.0205426	20
122.5	0.829411	0.703152	0.692639	0.651529	0.746085	0.67078	0.719435	0.80483	0.737674	0.847911	0.783893	0.706214	0.624881	0.477377	0.709334	0.700398	0.725901	0.806642	0.578691	0.744329	0.713055	0.0194994	20
125	0.842229	0.705304	0.697164	0.652574	0.753751	0.672812	0.747389	0.781776	0.740167	0.870869	0.793146	0.733483	0.626889	0.48646	0.737506	0.705822	0.739698	0.81546	0.603395	0.745233	0.722556	0.0194786	20
127.5	0.841137	0.707593	0.710698	0.665194	0.755007	0.704511	0.735125	0.799884	0.749072	0.879817	0.806256	0.659664	0.614951	0.477784	0.711552	0.702417	0.751182	0.823472	0.610705	0.741011	0.722352	0.0203587	20
130	0.84914	0.730065	0.732916	0.678122	0.787646	0.701777	0.760846	0.805965	0.752907	0.872991	0.807233	0.698553	0.636145	0.505542	0.730071	0.714988	0.756526	0.828645	0.620974	0.754898	0.736298	0.0190031	20
132.5	0.850928	0.712752	0.715387	0.675223	0.776404	0.713099	0.760583	0.821902	0.726237	0.870227	0.828547	0.759293	0.654615	0.508584	0.692399	0.71044	0.764273	0.831451	0.632414	0.766982	0.738587	0.0190284	20
135	0.858217	0.729004	0.726975	0.675665	0.772636	0.726209	0.780368	0.824212	0.743769	0.87598	0.836247	0.726341	0.661246	0.50348	0.717392	0.724212	0.777016	0.834368	0.652579	0.776676	0.74613	0.0190396	20
137.5	0.860475	0.738432	0.734211	0.700922	0.800349	0.717767	0.766193	0.815467	0.75975	0.904966	0.842111	0.764475	0.637168	0.506543	0.711498	0.717826	0.790447	0.833597	0.665639	0.780868	0.752435	0.0196695	20
140	0.859159	0.743282	0.750908	0.680682	0.804006	0.726967	0.797812	0.858397	0.777992	0.890324	0.847084	0.740799	0.666043	0.524722	0.704594	0.736355	0.800769	0.831553	0.674972	0.778276	0.759735	0.0190596	20
142.5	0.85706	0.768952	0.784626	0.693529	0.789136	0.735529	0.80452	0.830481	0.757807	0.892924	0.851589	0.725079	0.671942	0.515563	0.725995	0.754191	0.805694	0.83944	0.692682	0.800391	0.764856	0.0187075	20
145	0.869912	0.761164	0.769077	0.671228	0.791281	0.731105	0.810043	0.885049	0.780978	0.884438	0.865057	0.783919	0.667943	0.541012	0.716063	0.728298	0.820733	0.847865	0.706216	0.817246	0.772431	0.0192892	20
147.5	0.854397	0.792071	0.79423	0.677405	0.797837	0.75173	0.826241	0.857393	0.791651	0.889512	0.865473	0.725864	0.666281	0.547897	0.733645	0.733619	0.823008	0.854881	0.712956	0.828035	0.776206	0.0187149	20
150	0.89591	0.801244	0.802187	0.694278	0.801509	0.754771	0.829303	0.853597	0.762336	0.90018	0.89689	0.746901	0.681626	0.535035	0.706271	0.718609	0.828138	0.846503	0.723063	0.869137	0.782374	0.0203193	20
152.5	0.880226	0.795162	0.800019	0.698769	0.817949	0.758946	0.838513	0.866454	0.748158	0.924291	0.872673	0.75812	0.660905	0.545195	0.706075	0.725523	0.835882	0.849608	0.743115	0.832846	0.782921	0.0199114	20
155	0.91007	0.788089	0.79689	0.694238	0.806032	0.759296	0.874441	0.902031	0.77552	0.921811	0.884309	0.786635	0.696757	0.546838	0.735166	0.740174	0.846063	0.859312	0.751598	0.860645	0.796796	0.0203786	20
157.5	0.899757	0.811904	0.823088	0.716961	0.806711	0.772908	0.886041	0.899587	0.778253	0.915983	0.875781	0.728304	0.681513	0.545431	0.693671	0.739353	0.85275	0.850704	0.768143	0.865521	0.795618	0.0208084	20
160	0.89796	0.7961	0.804454	0.736955	0.810081	0.804941	0.887407	0.928468	0.763471	0.926816	0.87921	0.753077	0.692762	0.551371	0.727506	0.74297	0.859332	0.863099	0.776577	0.881274	0.804192	0.020513	20
162.5	0.903388	0.802859	0.800866	0.716865	0.813917	0.805587	0.893635	0.937419	0.779415	0.921853	0.890653	0.739644	0.69267	0.55408	0.713475	0.746679	0.862842	0.863199	0.782249	0.888384	0.805484	0.0211768	20
165	0.911519	0.825085	0.827607	0.71225	0.809672	0.806653	0.887356	0.943796	0.799738	0.944628	0.892196	0.813974	0.707069	0.570561	0.726918	0.740498	0.871569	0.865994	0.799086	0.883143	0.816966	0.020544	20
167.5	0.916268	0.816519	0.825051	0.726836	0.802695	0.792054	0.916111	0.939217	0.783976	0.914554	0.881517	0.84127	0.724237	0.560807	0.74449	0.741522	0.89264	0.866662	0.808844	0.899266	0.819727	0.0204594	20
170	0.926759	0.828601	0.840323	0.726501	0.820688	0.822061	0.904181	0.97405	0.791152	0.933407	0.886426	0.827537	0.701878	0.575944	0.762436	0.754158	0.904569	0.873918	0.833862	0.914059	0.830126	0.0210153	20
172.5	0.921708	0.832168	0.846319	0.737382	0.822627	0.808294	0.924023	0.960281	0.782208	0.959064	0.890404	0.756536	0.692092	0.578272	0.740721	0.752792	0.909548	0.879213	0.825141	0.915281	0.826704	0.0219888	20
175	0.940025	0.819539	0.831183	0.722312	0.820498	0.82198	0.9187	0.9771	0.782325	0.954796	0.894761	0.781488	0.701948	0.574409	0.73986	0.756279	0.920028	0.893808	0.863114	0.92849	0.832132	0.022713	20
177.5	0.943057	0.820998	0.837509	0.728883	0.810707	0.817294	0.939471	0.9754	0.786414	0.958085	0.864937	0.794789	0.670362	0.591129	0.741592	0.747744	0.917529	0.889603	0.87167	0.929128	0.831815	0.0227923	20
180	0.95113	0.829984	0.857279	0.724091	0.82058	0.835659	0.961945	0.981875	0.781065	0.940119	0.882764	0.898496	0.719239	0.616132	0.709895	0.766493	0.922628	0.89096	0.864912	0.925855	0.844055	0.0220313	20
182.5	0.932561	0.844051	0.882578	0.754958	0.815999	0.82654	0.926982	1.02313	0.814783	0.932143	0.90939	0.871491	0.718338	0.625565	0.712617	0.754808	0.937411	0.897495	0.869912	0.950947	0.850085	0.0219242	20
185	0.962054	0.847778	0.901667	0.756586	0.807019	0.828711	0.942643	0.996318	0.859138	0.953631	0.90574	0.853222	0.72624	0.621611	0.721491	0.747823	0.940103	0.892282	0.863099	0.954831	0.854099	0.0220856	20
187.5	0.966366	0.854309	0.880629	0.75451	0.78964	0.855071	0.942799	1.04599	0.854965	0.930012	0.911449	0.897793	0.718278	0.633276	0.755423	0.753616	0.958287	0.892051	0.873676	0.971223	0.861968	0.0226667	20
190	0.963263	0.841625	0.846969	0.75802	0.796265	0.832727	0.948486	1.01614	0.884502	0.926122	0.911511	0.896522	0.730638	0.649538	0.727994	0.722367	0.956426	0.896652	0.87963	0.995705	0.859055	0.0226161	20
192.5	0.977119	0.844733	0.856262	0.783215	0.802156	0.83363	0.972576	1.02116	0.878799	0.932991	0.929845	0.937546	0.72983	0.652506	0.710437	0.742275	0.956887	0.891674	0.894284	0.998921	0.867342	0.0232342	20
195	0.980933	0.856277	0.869401	0.792134	0.804963	0.867202	0.961572	1.02449	0.914098	0.918173	0.917439	0.875738	0.738267	0.654917	0.712586	0.728811	0.959246	0.896066	0.877102	1.01165	0.868053	0.0228615	20
197.5	0.972655	0.86644	0.8646	0.788275	0.81084	0.851846	0.991539	1.04314	0.919626	0.920621	0.926738	0.851	0.733981	0.652342	0.700047	0.735246	0.976253	0.89883	0.896773	1.03555	0.871817	0.0244702	20
200	0.977333	0.847835	0.86845	0.81409	0.818598	0.832947	0.969706	1.06732	0.91853	0.92178	0.902839	0.870717	0.716428	0.645083	0.692293	0.732297	0.982392	0.897891	0.900815	1.02202	0.869968	0.0249384	20
202.5	0.980851	0.875079	0.897389	0.827551	0.819033	0.828853	0.984685	1.04913	0.895772	0.925384	0.924538	0.890117	0.716863	0.671779	0.714728	0.734243	0.994479	0.897394	0.887452	1.03176	0.877354	0.0239748	20
205	0.994311	0.855576	0.891677	0.833212	0.7756	0.836571	0.972985	1.07246	0.878106	0.899624	0.900867	0.878153	0.71253	0.687166	0.67221	0.722086	1.00456	0.905324	0.871443	1.0581	0.871128	0.0259053	20
207.5	0.996238	0.871364	0.903098	0.837063	0.820806	0.830085	0.988655	1.09552	0.927837	0.918646	0.920568	0.812558	0.706249	0.675272	0.676213	0.732583	1.02378	0.889422	0.889736	1.08058	0.879814	0.027465	20
210	0.99433	0.870329	0.902811	0.837251	0.806683	0.84121	0.965732	1.05459	0.911398	0.91106	0.900806	0.874142	0.743121	0.706998	0.693294	0.734738	1.02821	0.88344	0.874983	1.07169	0.880341	0.024388	20
212.5	1.00964	0.876347	0.909888	0.844254	0.807062	0.829607	0.98033	1.05928	0.923086	0.888942	0.928927	0.850663	0.734108	0.7077	0.657994	0.724686	1.05336	0.881293	0.874976	1.08361	0.881288	0.0266623	20
215	1.05011	0.88802	0.91854	0.858189	0.798852	0.842191	0.991649	1.06133	0.928603	0.931721	0.923088	0.863427	0.74179	0.721403	0.668819	0.729399	1.0561	0.876046	0.853795	1.09003	0.889655	0.0269984	20
217.5	1.07075	0.883802	0.91974	0.881582	0.811787	0.853925	1.00773	1.08311	0.874039	0.918586	0.918605	0.898029	0.714235	0.709917	0.708603	0.730124	1.06114	0.873246	0.854168	1.07718	0.892514	0.027229	20
220	1.06977	0.874657	0.911323	0.893016	0.815232	0.840231	0.997481	1.07028	0.832229	0.947611	0.929866	0.872464	0.768457	0.723626	0.709451	0.744129	1.07448	0.886872	0.840243	1.07722	0.893932	0.0262219	20
222.5	1.07789	0.868082	0.918051	0.91315	0.832045	0.86067	0.979059	1.07919	0.898988	0.925825	0.916033	0.879982	0.72331	0.72748	0.764969	0.726696	1.07187	0.891108	0.836098	1.07919	0.898484	0.0258552	20
225	1.06211	0.884951	0.934621	0.927225	0.837405	0.855906	0.993953	1.08946	0.929893	0.930595	0.917382	0.885488	0.728489	0.730739	0.769908	0.746232	1.09	0.886826	0.833773	1.11247	0.907371	0.0263939	20
227.5	1.06734	0.867241	0.923052	0.950546	0.828734	0.857539	0.990122	1.07568	0.927505	0.913313	0.9296	0.884145	0.75073	0.722038	0.7669	0.711984	1.10189	0.896866	0.829037	1.11035	0.905231	0.0269802	20
230	1.05718	0.880974	0.941753	0.948968	0.838095	0.856379	0.972679	1.0597	0.943283	0.918515	0.93349	0.874668	0.754614	0.754153	0.73688	0.729554	1.10698	0.88889	0.834923	1.12588	0.907878	0.0263957	20
232.5	1.06107	0.852449	0.918401	0.9391	0.85064	0.855313	0.979993	1.09649	0.922762	0.938007	0.935784	0.893198	0.735729	0.732267	0.744617	0.735704	1.11283	0.887294	0.842914	1.14606	0.909032	0.0279424	20
235	1.07873	0.853924	0.904282	0.952306	0.86221	0.838397	0.960751	1.11573	0.941148	0.958078	0.973053	0.833327	0.740535	0.756854	0.752891	0.684508	1.12518	0.887446	0.828797	1.13347	0.909081	0.029465	20
237.5	1.07766	0.869636	0.936406	0.961735	0.862065	0.840406	0.957062	1.06442	0.934359	0.938534	0.92766	0.842917	0.756137	0.752875	0.759631	0.70501	1.12916	0.886261	0.822594	1.14123	0.908288	0.0278704	20
240	1.08113	0.869274	0.936601	0.929994	0.864755	0.871923	0.952855	1.12634	0.953794	0.947332	0.975853	0.912786	0.745831	0.759345	0.777712	0.713748	1.1485	0.894407	0.826191	1.13226	0.921031	0.0284984	20
242.5	1.07019	0.851783	0.945014	0.941234	0.877716	0.848756	0.946413	1.0817	0.93943	0.941027	0.950815	0.859346	0.721457	0.776956	0.74521	0.69791	1.14889	0.892961	0.824489	1.1599	0.91106	0.0292628	20
245	1.07783	0.859101	0.944404	0.940691	0.858097	0.868066	0.943918	1.06548	0.911227	0.941942	0.961567	0.840183	0.744132	0.781267	0.741952	0.709706	1.16309	0.892869	0.815642	1.15608	0.910862	0.0289033	20
247.5	1.09248	0.87019	0.944857	0.944337	0.884839	0.879955	0.925024	1.027	0.962568	0.93523	0.969036	0.891697	0.714796	0.754489	0.761471	0.678879	1.17114	0.899965	0.794483	1.11932	0.911088	0.0291613	20
250	1.10015	0.857084	0.942583	0.946873	0.876823	0.884604	0.911962	1.02368	0.965396	0.932014	0.950285	0.856895	0.729476	0.77311	0.733232	0.695733	1.15719	0.885126	0.804317	1.1223	0.907442	0.0285788	20
252.5	1.0874	0.871191	0.951008	0.965123	0.906821	0.851096	0.912423	1.01934	0.937932	0.950529	0.99152	0.849824	0.723225	0.78204	0.739276	0.685543	1.16824	0.886117	0.805285	1.12545	0.910469	0.0290758	20
255	1.08578	0.85772	0.950698	0.968525	0.899042	0.846624	0.920975	1.04429	0.926209	0.941423	0.987073	0.827466	0.728607	0.796825	0.737827	0.685516	1.17188	0.881108	0.813809	1.12549	0.909844	0.0292834	20
257.5	1.08324	0.865864	0.935257	0.961624	0.92387	0.846556	0.938887	0.995294	0.94636	0.933167	0.974069	0.817651	0.70355	0.769847	0.75164	0.684063	1.1754	0.890952	0.81955	1.14764	0.908224	0.0297296	20
260	1.09118	0.863384	0.950433	0.969454	0.902043	0.861216	0.903172	1.03408	0.95785	0.955899	0.968805	0.866719	0.757074	0.774268	0.700836	0.674251	1.1912	0.879882	0.817913	1.16875	0.914421	0.0309475	20
262.5	1.10141	0.839102	0.925759	0.969754	0.880834	0.881082	0.923328	1.01743	0.946051	0.949722	0.977834	0.868424	0.753369	0.765287	0.716485	0.674451	1.20611	0.885114	0.79902	1.1716	0.912608	0.0314315	20
265	1.08955	0.871019	0.958686	0.96559	0.888931	0.88033	0.919435	1.02285	0.938007	0.959171	1.01943	0.860165	0.738832	0.777662	0.705446	0.678294	1.21548	0.880838	0.82289	1.17445	0.918353	0.0317749	20
267.5	1.08795	0.860973	0.94603	0.969583	0.905915	0.887033	0.917583	0.979185	0.945766	0.949908	0.984197	0.880486	0.72991	0.761239	0.703047	0.663299	1.219	0.877919	0.824949	1.1773	0.913564	0.0319022	20
270	1.11181	0.86784	0.951376	0.960477	0.903469	0.87704	0.914207	0.975934	0.934674	0.932169	1.03452	0.857431	0.741334	0.760555	0.705856	0.674826	1.21215	0.875408	0.827007	1.18015	0.914912	0.0320882	20
272.5	1.09928	0.874282	0.953999	0.95438	0.907477	0.874576	0.904605	0.972472	0.929354	0.939614	0.98	0.923455	0.753273	0.773621	0.720289	0.66185	1.22201	0.872897	0.829066	1.183	0.916475	0.0312981	20
275	1.11073	0.873919	0.938596	0.946035	0.92234	0.887637	0.915092	0.986524	0.95624	0.957061	0.997373	0.885975	0.754999	0.754484	0.708209	0.661986	1.218	0.870386	0.831125	1.18585	0.918128	0.0320639	20
277.5	1.09352	0.856082	0.932141	0.964385	0.917412	0.875727	0.923372	0.957225	0.962737	0.951645	1.01806	0.870191	0.744306	0.766824	0.701071	0.675206	1.22719	0.867875	0.833184	1.1887	0.916343	0.0321729	20
280	1.10889	0.863235	0.939542	0.953667	0.898336	0.852924	0.88357	0.99977	0.942721	0.97336	0.999078	0.877426	0.720902	0.772604	0.699943	0.66246	1.21232	0.865364	0.835242	1.19155	0.912645	0.0328034	20
282.5	1.10244	0.862469	0.940313	0.938246	0.915889	0.87373	0.909999	0.974583	0.960242	0.947284	1.00004	0.820107	0.73648	0.73772	0.726815	0.672233	1.22804	0.862853	0.837301	1.1944	0.912059	0.0326854	20
285	1.1044	0.853314	0.9184	0.932084	0.917973	0.916345	0.884217	0.970843	0.982489	0.962336	0.987248	0.758315	0.70591	0.763549	0.715649	0.678983	1.21463	0.860342	0.83936	1.19725	0.908182	0.0332434	20
287.5	1.11272	0.855685	0.91293	0.928036	0.922327	0.910039	0.902661	0.972613	0.955558	0.986465	1.00588	0.812429	0.723529	0.753509	0.719602	0.661093	1.21238	0.857831	0.841418	1.20011	0.912341	0.0330677	20
290	1.11172	0.862382	0.917339	0.941425	0.941559	0.928548	0.904435	0.923341	0.961347	0.958861	0.986403	0.869127	0.73231	0.76542	0.730445	0.652554	1.21308	0.85532	0.843477	1.20296	0.915103	0.0321859	20
292.5	1.12311	0.862015	0.937201	0.922146	0.926236	0.880017	0.914914	0.92951	0.985607	0.958352	1.00419	0.83506	0.733141	0.751389	0.698644	0.649896	1.21791	0.852809	0.845536	1.20581	0.911674	0.0336842	20
295	1.13605	0.850831	0.947761	0.927475	0.924168	0.886739	0.925208	0.957253	0.971248	0.980522	1.00091	0.822436	0.725799	0.750456	0.713381	0.671056	1.21446	0.850298	0.847594	1.20866	0.915615	0.0335627	20
297.5	1.14767	0.856581	0.944565	0.931618	0.930051	0.892101	0.927922	0.960779	0.934949	0.982207	1.01769	0.832843	0.725923	0.766458	0.751344	0.679626	1.21508	0.847787	0.849653	1.21151	0.920318	0.0328517	20
300	1.14807	0.867504	0.965264	0.925702	0.93115	0.900528	0.898103	0.980478	0.927538	0.991632	1.02043	0.866411	0.709789	0.756886	0.719791	0.671477	1.22464	0.845276	0.851712	1.21436	0.920837	0.034104	20
302.5	1.13589	0.858773	0.955226	0.925829	0.945689	0.917751	0.895282	0.981939	0.928101	0.991922	1.04575	0.817454	0.710865	0.744216	0.730016	0.706437	1.22196	0.842765	0.85377	1.21721	0.921343	0.0338139	20
305	1.14488	0.851009	0.956512	0.935529	0.950892	0.899994	0.904886	0.949218	0.937947	0.988346	1.03776	0.797259	0.726191	0.747559	0.750129	0.700407	1.21471	0.840253	0.855829	1.22006	0.920469	0.0334431	20
307.5	1.15286	0.837483	0.961793	0.943588	0.974908	0.887741	0.901705	0.933795	0.899164	0.990387	1.04038	0.868749	0.713841	0.749577	0.733781	0.684711	1.19461	0.837742	0.857888	1.22291	0.919381	0.0336308	20
310	1.14671	0.83687	0.960305	0.926266	0.94036	0.910447	0.937347	0.975077	0.959438	1.01263	1.0756	0.821259	0.705762	0.734321	0.731349	0.687743	1.19125	0.835231	0.859946	1.22576	0.923684	0.0346183	20
312.5	1.13936	0.844984	0.964683	0.931282	0.921985	0.888977	0.921396	0.942085	0.938713	1.02485	1.08861	0.843513	0.711811	0.728768	0.748408	0.688603	1.19273	0.83272	0.862005	1.22861	0.922205	0.0342728	20
315	1.14086	0.860545	0.953796	0.923005	0.920372	0.896192	0.921729	0.940512	0.968629	1.02373	1.08959	0.822697	0.702024	0.734556	0.730485	0.681463	1.19035	0.830209	0.864064	1.23146	0.921314	0.0348599	20

## Sheet: VAPDKO+MSP+ITZ
PI4P Removal from Golgi
HeLa VAPB DKO + MSP domain + ITZ
Experiments:
200206_Optogenetics
190905_OptoVAPB+ITZ
200313_PI4POpto
Measure: (FROI-FBkg)/(FWholeCell-FBkg) Normalized for F measured at t1
Time	Cell1	Cell2	Cell3	Cell4	Cell5	Cell6	Cell7	Cell8	Cell9	Cell10	Cell11	Cell12	Cell13	Cell14	Cell15	Cell16	Average	ES	N
0	1	1	1	1	1	1	1	1	1	1	1	1	1	1	1	1	1	0	16
2.5	1.05128	1.00147	1.00966	0.993952	1.02346	0.981446	0.958607	0.980658	0.983452	1.01448	0.991884	0.98071	0.962406	0.995641	1.00817	0.959413	0.993543	0.00617282	16
5	1.01665	0.991073	1.01951	0.995462	1.00153	0.995618	0.998179	0.957731	0.98954	1.01463	0.967289	1.00671	0.976846	1.03078	1.00053	0.958357	0.995027	0.00533481	16
7.5	1.0374	0.982861	1.02882	1.00596	1.01266	0.958356	0.963105	0.971445	0.979176	1.05504	0.917299	1.00788	0.966265	1.01989	0.976696	0.969501	0.990772	0.00881256	16
10	1.04646	1.01174	0.998617	0.994274	0.995808	1.00998	0.939277	0.959518	1.00282	1.06426	0.9508	1.03534	0.99786	0.994834	0.979428	0.941008	0.995126	0.00892912	16
12.5	1.02419	1.00138	1.02103	0.987967	1.01539	0.981639	0.913899	0.922534	0.983543	1.06475	0.918479	1.03495	0.992779	1.02989	0.98043	0.949757	0.988913	0.0110641	16
15	1.04612	0.987323	1.0207	0.980371	1.03355	0.979437	0.925694	0.960794	0.965488	1.08281	0.962016	1.01617	0.960662	1.00255	0.96823	0.934012	0.989121	0.0105051	16
17.5	1.01579	0.97886	0.995797	0.977086	0.99715	1.00787	0.919931	0.922063	0.973292	1.06547	0.93453	1.01683	0.974075	1.02033	0.983331	0.947848	0.983141	0.00976796	16
20	1.03591	0.986807	1.02742	0.986106	1.0085	0.975625	0.943188	0.960166	0.995486	1.06982	0.955938	1.03997	0.985484	1.0208	0.975448	0.961907	0.995535	0.00882744	16
22.5	1.03371	1.01487	1.02211	1.00122	1.01707	1.02379	0.92768	0.949255	0.99203	1.07531	0.934852	1.01121	0.982796	0.999986	0.966622	0.947158	0.99373	0.0100394	16
25	1.06094	1.04228	1.02728	0.990047	1.03523	0.992879	0.964648	0.921453	0.976257	1.11524	0.930648	1.01623	0.969473	1.02728	0.971655	0.946903	0.999278	0.0127905	16
27.5	1.01071	0.99396	1.01806	0.991425	1.00216	0.999375	0.92752	0.917456	0.977439	1.10555	0.905938	1.06037	0.985065	1.04872	0.962832	0.945139	0.990732	0.0132881	16
30	1.0352	1.00702	1.01444	0.97933	0.98708	0.983217	0.962845	0.953673	0.97925	1.11894	0.873994	1.03979	0.98549	1.01118	0.94378	0.992208	0.991714	0.0129735	16
32.5	1.00643	0.983724	1.0111	0.984855	1.01452	0.931865	0.979368	0.913699	0.969909	1.13928	0.904336	1.06365	1.00652	1.05933	0.963625	0.954994	0.99295	0.0148618	16
35	0.97909	1.01155	0.986368	0.981605	1.00683	0.950451	0.963994	0.888035	0.974264	1.19487	0.88467	1.05569	0.976503	1.03716	0.962554	1.03912	0.993298	0.0178671	16
37.5	1.02483	0.986403	1.02013	0.979901	0.998866	0.948951	0.919371	0.880598	0.971652	1.19628	0.869291	1.0911	0.952811	1.02662	0.961978	0.988383	0.988572	0.0195912	16
40	1.04014	0.985715	1.001	0.973213	1.01074	0.992657	0.907483	0.886736	1.0011	1.16457	0.898126	1.04527	1.01219	1.05444	0.939528	0.976777	0.993106	0.0170968	16
42.5	0.98479	1.00144	1.0187	0.985534	1.02801	1.00849	0.917479	0.904645	0.959835	1.20629	0.885361	1.04315	1.00032	1.04862	0.944501	0.967516	0.994043	0.0185579	16
45	1.02133	1.00593	1.01435	0.965977	1.01779	1.02157	0.932669	0.910775	0.965643	1.20692	0.900932	1.04892	0.950707	1.03098	0.920398	1.01215	0.99544	0.0183571	16
47.5	0.964079	0.980079	0.984996	0.986172	1.00745	0.977561	0.917548	0.905329	0.963256	1.20384	0.871457	1.05013	0.950453	1.05519	0.921911	1.06335	0.987676	0.0197424	16
50	1.02678	1.00319	0.994561	0.971451	1.00707	0.91052	0.980851	0.926702	0.98986	1.18212	0.901799	1.07334	0.993809	1.01905	0.932922	0.999603	0.994602	0.0168444	16
52.5	1.01123	0.975718	1.01941	0.977689	1.00765	1.01619	1.00914	0.886207	0.97085	1.2267	0.887516	1.05959	0.978301	1.03915	0.925886	1.00175	0.999561	0.0194599	16
55	1.03828	0.997419	1.00226	0.9466	0.999286	0.994665	0.950725	0.906883	0.943265	1.21945	0.837874	1.02582	0.99715	1.04709	0.930902	1.02434	0.991376	0.0204315	16
57.5	0.989972	1.00048	0.992211	0.969645	1.01579	1.01665	0.981642	0.897002	0.975899	1.22533	0.872061	1.02437	1.02226	1.02592	0.925176	1.00567	0.996255	0.019088	16
60	1.03366	0.985763	1.00991	0.965328	1.0165	0.987033	0.9893	0.892544	0.968191	1.23735	0.830489	1.03903	0.976699	1.02455	0.940962	1.00039	0.993606	0.0210477	16
62.5	0.993736	1.02579	1.00226	0.975114	1.00426	0.956806	0.960701	0.893474	0.940385	1.23263	0.824807	1.00519	1.00045	1.00835	0.904845	1.01831	0.984194	0.0214047	16
65	1.00774	0.990086	1.02245	0.955951	1.02511	0.992058	0.932665	0.874962	0.958529	1.2692	0.811841	1.07925	0.961582	1.00797	0.908739	1.00923	0.987961	0.0247462	16
67.5	0.976118	0.968685	1.02612	0.946203	0.997974	0.988065	0.984009	0.853241	0.959896	1.27463	0.8564	1.09509	0.945884	1.01665	0.887527	0.976805	0.984582	0.0246942	16
70	1.04208	1.00571	0.993842	0.944205	0.986073	0.952686	0.92946	0.860147	0.923909	1.27595	0.841747	1.09583	0.968952	0.995466	0.878826	0.982776	0.979854	0.0256219	16
72.5	1.02447	1.02297	1.01789	0.961984	1.01276	1.00978	0.934334	0.873731	0.930773	1.24849	0.847078	1.0527	0.92767	1.00908	0.859512	0.973243	0.981655	0.0238476	16
75	1.03284	1.01383	1.02619	0.963805	0.995589	0.996443	0.99317	0.875571	0.935219	1.28201	0.862833	1.05783	0.950413	0.995796	0.87581	0.983065	0.990026	0.0242648	16
77.5	1.00236	1.00654	1.0181	0.952093	0.991451	0.970474	0.911816	0.869977	0.93751	1.24485	0.861919	1.0551	0.953641	0.973332	0.859187	0.94697	0.972207	0.0230396	16
80	1.00474	0.98451	0.999078	0.939623	0.986512	1.01123	0.938872	0.849765	0.920513	1.28572	0.862515	1.11316	0.957497	0.99454	0.862137	0.955323	0.979109	0.0263028	16
82.5	1.05558	1.01371	1.01756	0.96817	1.01111	0.972071	0.962374	0.864566	0.925675	1.29725	0.855359	1.09904	0.981942	1.005	0.874777	0.945499	0.990605	0.026415	16
85	0.991086	1.0197	1.00032	0.972724	1.02065	1.04921	0.931707	0.851303	0.940437	1.30489	0.861641	1.06596	1.00032	1.00126	0.847416	0.971015	0.989353	0.0268595	16
87.5	1.01809	0.986193	1.02297	0.975778	1.02652	0.924172	0.93972	0.872505	0.923548	1.31064	0.893317	1.05173	0.995048	0.962654	0.862639	0.963433	0.983061	0.0259331	16
90	0.976195	1.01857	0.989357	0.955933	1.01423	1.00082	0.913231	0.871507	0.916594	1.29103	0.871052	1.07091	0.96497	0.983111	0.834113	0.94238	0.975875	0.0261054	16
92.5	1.00398	0.981026	1.00867	0.960964	1.00353	0.987774	0.943562	0.831185	0.930257	1.3029	0.928957	1.05663	0.95377	0.951206	0.838513	0.95466	0.977349	0.0260711	16
95	0.971907	0.991339	1.02009	0.958738	1.02354	0.972643	0.930953	0.850988	0.902493	1.34145	0.904037	1.04249	0.966773	0.955205	0.825154	0.987688	0.977843	0.0284556	16
97.5	0.997309	0.980844	1.02003	0.953895	1.02288	1.0225	0.938449	0.835497	0.904921	1.32575	0.922476	1.07574	0.925713	0.940402	0.830485	0.973992	0.97943	0.0283865	16
100	1.02551	0.985141	1.03057	0.974765	1.00102	0.968692	0.963687	0.857253	0.898485	1.30441	0.893737	1.06196	0.978664	0.949913	0.804668	0.999492	0.981123	0.0272822	16
102.5	0.995125	0.972358	1.00727	0.950445	1.02677	1.00392	0.929583	0.846441	0.922325	1.31199	0.94509	1.06474	0.933259	0.961098	0.849792	0.98127	0.981342	0.0263357	16
105	0.990196	0.992032	1.01999	0.946846	1.02087	0.977254	0.929789	0.837697	0.905323	1.28973	0.922856	1.06129	0.952727	0.952874	0.835547	0.997745	0.977048	0.0259246	16
107.5	0.997794	0.983921	1.00843	0.956478	1.0038	0.991046	0.921112	0.835258	0.88686	1.30721	0.894771	1.06856	0.97982	0.979436	0.851795	0.993892	0.978762	0.0269454	16
110	1.02744	1.00022	1.00799	0.929218	1.00753	0.928911	0.936311	0.82373	0.909478	1.34123	0.888045	1.02467	0.925234	0.959359	0.825221	0.99585	0.970652	0.0294295	16
112.5	1.00558	0.979162	1.01588	0.942228	0.998169	0.958654	0.954109	0.812166	0.899902	1.32857	0.882018	0.983713	0.938594	0.969179	0.83223	0.992185	0.968271	0.0282945	16
115	0.966116	1.02332	1.01812	0.940473	0.993839	0.933505	0.953465	0.843084	0.894609	1.31968	0.871821	0.986321	0.95897	0.956423	0.844916	0.993028	0.968606	0.0272828	16
117.5	1.00705	0.982864	1.01966	0.960968	0.996631	0.913859	0.949047	0.85431	0.88585	1.35439	0.915595	1.00566	0.972071	0.965809	0.835994	1.02036	0.977508	0.0289004	16
120	0.960811	1.02546	1.01534	0.947941	0.996036	0.955065	0.956233	0.828583	0.894956	1.36193	0.919285	0.96909	0.942612	0.952272	0.839619	1.02101	0.974139	0.0295095	16
122.5	1.01557	0.978618	1.01304	0.937025	0.991804	0.870767	0.947894	0.839289	0.886635	1.37152	0.921532	0.993965	0.949378	0.93283	0.84585	0.972945	0.966792	0.0303552	16
125	1.00152	0.970831	1.0083	0.937694	0.980649	0.930387	0.917403	0.85453	0.906159	1.37738	0.95673	0.970729	0.984106	0.967567	0.813751	0.974325	0.972004	0.0300046	16
127.5	0.962194	0.979737	1.01195	0.940279	0.979432	0.947191	0.957804	0.808072	0.900921	1.38786	0.960106	0.980401	1.00535	0.949688	0.831337	0.985994	0.97427	0.0309714	16
130	1.00502	0.9823	1.00598	0.940528	0.994256	0.981392	0.927627	0.875424	0.908459	1.3731	0.937785	0.999703	0.979369	0.936862	0.826549	0.984044	0.978649	0.0291516	16
132.5	0.991225	0.987139	0.997914	0.958055	0.984364	0.959918	0.969218	0.832753	0.906704	1.40511	0.939591	0.989941	0.960069	0.929861	0.812181	0.97833	0.975148	0.0317358	16
135	1.00059	0.959772	1.01037	0.938235	0.98285	0.948856	0.929506	0.827629	0.905637	1.37333	0.952044	1.01909	0.942379	0.926775	0.819658	0.979672	0.969775	0.0303508	16
137.5	1.02183	0.985354	0.995356	0.949133	0.991135	0.974155	0.978001	0.849667	0.907879	1.41354	0.951655	0.997024	0.923334	0.916623	0.805434	0.998306	0.978651	0.0324276	16
140	0.996952	0.989609	1.01579	0.941775	0.998607	0.996315	0.919078	0.842452	0.912551	1.36469	0.949903	1.03413	0.919792	0.926322	0.825389	0.979395	0.975797	0.0297815	16
142.5	1.01018	0.993646	1.02499	0.927105	0.965928	1.00746	0.933492	0.812041	0.905298	1.37751	0.961404	1.00707	0.910674	0.938475	0.841717	0.958152	0.973447	0.0307789	16
145	0.97394	0.980565	0.997018	0.935842	0.991642	0.976805	0.942042	0.854361	0.909063	1.38298	0.98238	1.03376	0.942202	0.967437	0.829589	0.952233	0.978241	0.0299236	16
147.5	1.01257	0.975041	1.01472	0.928404	0.989189	0.937523	0.94462	0.852279	0.88923	1.39823	0.927887	1.03625	0.920673	0.945115	0.81446	0.95228	0.971155	0.031957	16
150	0.992349	0.993559	0.999581	0.941867	0.995389	0.910045	0.914218	0.83167	0.919364	1.40495	0.981525	0.999437	0.948831	0.927801	0.811485	0.962936	0.970938	0.0322325	16
152.5	0.99963	0.991106	1.03112	0.937002	0.985078	0.98895	0.933061	0.830455	0.93062	1.41875	0.941481	1.01923	0.91233	0.948604	0.82743	0.947275	0.977633	0.0327508	16
155	0.966528	0.982947	1.01058	0.937168	0.987974	0.964845	0.956571	0.832354	0.91416	1.41404	0.96241	0.970046	0.93781	0.958891	0.814135	0.928112	0.97116	0.032269	16
157.5	0.984124	0.988301	1.02487	0.936467	0.999306	1.00278	0.92869	0.819118	0.914098	1.39506	0.935096	0.978382	0.934052	0.977947	0.820636	0.963043	0.975123	0.0315869	16
160	0.983223	0.970971	1.01718	0.925301	0.978516	0.917391	0.887348	0.824043	0.913516	1.38334	0.97214	0.998529	0.906512	0.94771	0.819014	0.945483	0.961889	0.0314317	16
162.5	0.992474	0.973517	0.996896	0.923914	0.966965	0.886155	0.956514	0.828834	0.904728	1.4014	0.970619	0.98534	0.937374	0.955732	0.83033	0.959133	0.96687	0.0317448	16
165	1.02753	1.00443	1.02138	0.922009	0.983234	0.943895	0.961366	0.812992	0.89552	1.39087	0.928075	0.997894	0.9348	0.947389	0.816422	0.955543	0.97146	0.0319993	16
167.5	0.967941	0.996923	1.01684	0.918533	0.997012	0.982866	0.930363	0.82311	0.911773	1.38296	0.940716	1.02205	0.950983	0.949995	0.818939	0.957543	0.973034	0.0310036	16
170	0.946512	0.990459	0.998932	0.932731	0.973349	0.981812	0.914016	0.838178	0.898642	1.38712	0.926994	1.02629	0.934574	0.932023	0.806572	0.968987	0.966075	0.0314326	16
172.5	0.980623	0.977397	1.01274	0.945396	0.996031	0.917965	0.879895	0.830641	0.920957	1.37453	0.937032	1.02983	0.967598	0.959201	0.841218	0.927622	0.968667	0.0304628	16
175	0.965338	0.971434	0.999215	0.918752	0.986561	0.930247	0.929567	0.859131	0.903493	1.34642	0.980833	1.051	0.970214	0.97298	0.839621	0.946677	0.973218	0.028097	16
177.5	0.998749	0.994869	1.00733	0.930363	1.00356	0.922723	0.995125	0.818808	0.896976	1.35466	0.98065	1.01114	0.928017	0.950139	0.832867	0.940971	0.972934	0.0294415	16
180	0.955398	0.979601	0.996698	0.936477	0.99378	0.852316	0.910509	0.828242	0.896337	1.31051	0.976897	1.04475	0.933627	0.970759	0.819153	0.972571	0.961101	0.0281379	16
182.5	0.940672	0.98025	0.998939	0.938509	0.988037	0.953602	0.962073	0.846183	0.900954	1.2944	0.966261	1.0489	0.930504	0.981963	0.813333	0.971362	0.969746	0.0259221	16
185	1.00402	0.985653	1.02076	0.920552	0.974625	0.995676	0.957323	0.813552	0.905111	1.32001	0.989243	1.05334	0.929013	0.956663	0.839717	0.979429	0.977793	0.0276679	16
187.5	0.997051	0.965984	1.00258	0.93062	0.993753	1.00335	0.891167	0.83374	0.914503	1.34097	0.962811	1.05114	0.917221	0.971485	0.849869	1.00671	0.97706	0.0284985	16
190	0.975438	1.00412	0.998139	0.933347	0.988281	0.927835	0.951292	0.846919	0.886046	1.31188	0.996796	1.04291	0.922582	0.967377	0.811444	0.988992	0.972087	0.0272786	16
192.5	0.982601	0.987487	0.987834	0.933443	1.0021	0.942445	0.937854	0.824127	0.90244	1.32462	0.972326	1.07395	0.928562	0.972454	0.847539	0.966533	0.974144	0.0276741	16
195	0.986127	0.962885	0.992192	0.931917	0.992237	0.9013	0.893161	0.850017	0.886504	1.29302	0.989546	1.02922	0.909861	0.953699	0.840847	1.00773	0.963766	0.0261674	16
197.5	0.939944	0.965225	0.991067	0.919373	0.974205	0.984006	0.941436	0.841056	0.884464	1.32217	0.991817	1.06356	0.919751	0.970279	0.842899	1.02015	0.973213	0.0276279	16
200	0.942185	0.945103	0.983695	0.937705	0.973033	0.900912	0.920007	0.85161	0.894154	1.31451	0.952715	1.03817	0.902128	0.975742	0.845577	1.03057	0.962988	0.0271037	16
202.5	0.938374	0.973769	0.992497	0.933725	0.974031	0.90711	0.896042	0.850109	0.91167	1.29366	0.970769	1.02904	0.909177	0.973587	0.850392	1.01708	0.963814	0.0256512	16
205	0.975365	0.955398	0.99779	0.916616	0.965916	0.936909	0.883202	0.843877	0.919567	1.3244	1.00228	1.04752	0.901801	0.949247	0.815089	1.01651	0.965718	0.0284722	16
207.5	0.962283	0.986255	1.00056	0.917669	0.957043	0.9671	0.946397	0.827605	0.897393	1.31939	1.02069	1.03954	0.903715	0.942224	0.838944	1.05703	0.97399	0.0280934	16
210	1.00895	0.949582	1.01271	0.924179	0.959794	0.855876	0.923576	0.853149	0.90621	1.32284	1.01395	1.07355	0.919032	0.948065	0.819601	1.0486	0.971229	0.0294298	16
212.5	0.960825	0.965598	0.971946	0.919008	0.960159	0.929692	0.917252	0.846116	0.899208	1.32259	1.02661	1.07515	0.873372	0.942611	0.809255	1.05973	0.967445	0.0295822	16
215	0.987455	0.975734	1.0123	0.930153	0.987557	0.935751	0.929005	0.855596	0.898942	1.36293	0.985212	1.08106	0.892272	0.950787	0.837135	1.09293	0.982177	0.0308748	16
217.5	0.955735	0.970868	0.99511	0.93184	0.983788	0.888142	0.890534	0.849107	0.883259	1.36359	0.992083	1.09124	0.884557	0.947613	0.81616	1.07238	0.96975	0.0322542	16
220	0.994122	0.980074	0.991697	0.92471	0.98624	0.952098	0.881044	0.847111	0.900043	1.34664	1.04222	1.07043	0.896689	0.942715	0.801037	1.04564	0.975157	0.0308778	16
222.5	0.961124	0.973797	0.999855	0.933633	0.96928	0.891353	0.887481	0.829181	0.904506	1.35003	1.05118	1.0916	0.888555	0.955136	0.824296	1.06808	0.973693	0.0318007	16
225	1.022	0.975699	0.991225	0.925569	0.966127	0.926011	0.920029	0.83894	0.884405	1.29455	1.06036	1.10941	0.871638	0.939496	0.806445	1.0838	0.975981	0.0300539	16
227.5	0.959759	0.959999	0.970778	0.929137	0.980499	0.941008	0.903462	0.838321	0.887925	1.31448	1.08565	1.03937	0.902496	0.957595	0.825033	1.0405	0.971	0.0287851	16
230	0.960414	0.9715	0.978647	0.930174	0.969527	0.939922	0.898883	0.845181	0.905044	1.30717	1.0792	1.1126	0.891913	0.965008	0.834889	1.08721	0.979831	0.0295827	16
232.5	0.947484	0.983702	0.983257	0.905293	0.992531	0.854771	0.88642	0.824105	0.884098	1.30606	1.11624	1.05772	0.896585	0.965348	0.845557	1.05539	0.969035	0.0305972	16
235	0.957692	0.950272	0.959673	0.911198	0.986056	0.863307	0.890189	0.843627	0.896182	1.26887	1.06111	1.07787	0.926298	0.94385	0.828696	1.07717	0.965129	0.0278735	16
237.5	0.945971	0.972111	0.989277	0.916359	0.973725	0.920693	0.897564	0.842167	0.876183	1.28752	1.09921	1.05398	0.895649	0.932795	0.836741	1.06942	0.969336	0.0285615	16
240	0.951054	0.969687	0.980865	0.899095	0.970758	0.912326	0.8803	0.841963	0.92077	1.30056	1.108	1.06784	0.862512	0.963505	0.836834	1.0736	0.971229	0.029834	16
242.5	0.975399	0.958463	0.998347	0.91553	0.979128	0.882468	0.925187	0.868068	0.909381	1.26642	1.15082	1.05273	0.879094	0.92037	0.826793	1.08924	0.97484	0.0288846	16
245	0.926235	0.99048	0.98411	0.915947	0.977405	0.914785	0.897444	0.856604	0.89118	1.27066	1.08446	1.06824	0.893596	0.921882	0.820804	1.07581	0.968102	0.0279577	16
247.5	0.977781	0.966913	0.990358	0.927545	0.97119	0.881298	0.874191	0.842743	0.900064	1.31476	1.13906	1.04781	0.871608	0.940459	0.828487	1.0726	0.971679	0.0312901	16
250	0.976825	0.988991	1.01179	0.923714	0.964224	0.842324	0.89281	0.845744	0.89807	1.31325	1.1341	1.07572	0.871458	0.907418	0.830328	1.11829	0.974691	0.0327811	16
252.5	0.957438	0.946951	0.972837	0.924155	0.972314	0.917732	0.892023	0.854405	0.895597	1.30288	1.09547	1.05385	0.88339	0.930676	0.829788	1.08282	0.96952	0.0292636	16
255	0.96788	0.976508	0.990467	0.922525	0.97347	0.935742	0.858409	0.847431	0.867726	1.33325	1.13146	1.06531	0.834304	0.929336	0.819424	1.06983	0.970191	0.0330181	16
257.5	0.941581	0.984693	0.964993	0.898152	0.959199	0.918173	0.8795	0.842253	0.914934	1.29928	1.11856	1.08016	0.835567	0.94281	0.816431	1.08065	0.967308	0.0312054	16
260	0.888053	0.96111	0.963728	0.92241	0.969842	0.944439	0.851789	0.874919	0.880121	1.29169	1.11011	1.10412	0.85422	0.938719	0.830839	1.10176	0.967992	0.0311579	16
262.5	0.964376	0.978118	0.976386	0.934367	0.980729	0.906452	0.868888	0.848885	0.904864	1.31035	1.15263	1.09428	0.840399	0.909889	0.809525	1.1187	0.974927	0.0333678	16
265	0.9411	0.970001	0.978361	0.921904	0.967491	0.93732	0.847781	0.855041	0.893228	1.2898	1.14007	1.06625	0.8526	0.931576	0.846587	1.1139	0.972063	0.0309523	16
267.5	0.928442	0.957247	0.990434	0.926029	0.948543	0.893388	0.871294	0.845114	0.904649	1.27681	1.17025	1.08096	0.829299	0.928231	0.808864	1.09903	0.966161	0.0323163	16
270	0.95622	0.971818	0.973326	0.907531	0.983529	0.902958	0.888216	0.856437	0.901045	1.27814	1.11354	1.06288	0.81146	0.91859	0.829233	1.08032	0.964702	0.0300428	16
272.5	0.957443	0.964711	0.983752	0.919575	0.950598	0.87905	0.891826	0.850641	0.887254	1.26761	1.15321	1.08822	0.82439	0.939357	0.822684	1.05503	0.96471	0.0306535	16
275	0.997756	0.955457	0.974321	0.921235	0.962796	0.946043	0.861976	0.879462	0.895059	1.26887	1.10227	1.08704	0.829937	0.93381	0.824785	1.0635	0.96902	0.0289214	16
277.5	1.00742	0.952631	0.978525	0.922032	0.936092	0.874879	0.858447	0.851602	0.875037	1.2398	1.1315	1.07024	0.787436	0.927004	0.820932	1.02768	0.953827	0.0299453	16
280	0.928463	0.965153	0.9795	0.906755	0.959134	0.963231	0.872532	0.85362	0.900526	1.25195	1.12569	1.08297	0.809715	0.922129	0.836024	1.02932	0.961669	0.0287743	16
282.5	0.966828	0.952893	0.958143	0.927353	0.957327	0.924905	0.905748	0.855484	0.886747	1.24155	1.11167	1.0604	0.815688	0.903153	0.844769	1.05426	0.960432	0.027402	16
285	0.994966	0.972967	0.971231	0.909235	0.954441	0.959563	0.893166	0.84591	0.897371	1.22939	1.1236	1.13116	0.813812	0.927401	0.834042	1.03244	0.968169	0.0286242	16
287.5	0.971614	0.976936	0.990026	0.914507	0.978035	0.880342	0.907704	0.843697	0.89081	1.21992	1.18442	1.10374	0.797014	0.90189	0.84849	1.03358	0.96517	0.0300733	16
290	0.945708	0.956714	0.977275	0.923204	0.961422	0.889686	0.891147	0.825564	0.902655	1.21615	1.12254	1.10126	0.823607	0.922253	0.846239	1.04469	0.959382	0.0277668	16
292.5	0.977801	0.969392	1.01007	0.912682	0.936932	0.918348	0.84544	0.832288	0.878908	1.23757	1.13465	1.09543	0.792173	0.937559	0.830627	1.03697	0.959178	0.0303205	16
295	0.969485	0.940076	0.968461	0.920871	0.942036	0.93257	0.921543	0.837246	0.886165	1.21924	1.11813	1.1285	0.801138	0.932499	0.838921	1.02057	0.961091	0.0281418	16
297.5	0.995142	0.981234	0.965172	0.901971	0.970177	0.88895	0.866176	0.834462	0.879935	1.2286	1.13789	1.09612	0.812402	0.94583	0.830356	1.00218	0.958537	0.0291592	16
300	0.965716	0.958611	0.984272	0.907455	0.95023	0.86508	0.868175	0.808828	0.889899	1.21976	1.09928	1.0801	0.829425	0.929622	0.806304	1.04993	0.950793	0.0287456	16
302.5	0.956398	0.935495	0.985281	0.91587	0.954525	0.901354	0.872993	0.815405	0.881246	1.18301	1.09329	1.12345	0.810311	0.922324	0.813981	1.09286	0.953612	0.028702	16
305	0.977025	0.949196	0.970265	0.917453	0.951448	0.925074	0.86584	0.790827	0.867517	1.18501	1.09621	1.0837	0.807142	0.928412	0.808141	1.03972	0.947686	0.0278005	16
307.5	0.957246	0.982633	0.98007	0.90724	0.938557	0.948789	0.889234	0.801754	0.876595	1.15371	1.07853	1.0894	0.801144	0.916998	0.808239	1.06438	0.949658	0.0265296	16
310	0.9547	0.961157	0.985257	0.913855	0.950914	0.904191	0.89306	0.812709	0.860996	1.14225	1.12667	1.08298	0.82428	0.947055	0.805873	1.09447	0.953776	0.0272255	16
312.5	0.930568	0.944661	0.962238	0.904033	0.966149	0.887704	0.885866	0.79429	0.883566	1.18182	1.11859	1.11643	0.807314	0.936341	0.790019	1.05932	0.948057	0.0294023	16
315	0.914286	0.93624	0.967282	0.918632	0.959966	0.942551	0.843981	0.785952	0.909095	1.17894	1.13775	1.08738	0.79624	0.935308	0.797632	1.07564	0.94918	0.029729	16
